# Supplementary material
Source: Research Square preprint supplement (doi:10.21203/rs.3.rs-9225422/v1)
Supplement: Supplementary file 1 [file 03d166705aa152105affd58c.xlsx]

## Sheet: US_LP_Env
Model	unknown
	Variables:
	x	:	Size=13,	Index=I
	Key	:	Lower	:	Value	:	Upper	:	Fixed	:	Stale	:	Domain
	1	:	0	:	19495	:	None	:	False	:	False	:	NonNegativeReals
	2	:	0	:	1653.88	:	None	:	False	:	False	:	NonNegativeReals
	3	:	0	:	4647.06	:	None	:	False	:	False	:	NonNegativeReals
	4	:	0	:	704.101	:	None	:	False	:	False	:	NonNegativeReals
	5	:	0	:	6931.68	:	None	:	False	:	False	:	NonNegativeReals
	6	:	0	:	3557.79	:	None	:	False	:	False	:	NonNegativeReals
	7	:	0	:	176.227	:	None	:	False	:	False	:	NonNegativeReals
	8	:	0	:	1730.51	:	None	:	False	:	False	:	NonNegativeReals
	9	:	0	:	9174.04	:	None	:	False	:	False	:	NonNegativeReals
	10	:	0	:	792.819	:	None	:	False	:	False	:	NonNegativeReals
	11	:	0	:	1850.46	:	None	:	False	:	False	:	NonNegativeReals
	12	:	0	:	14197.7	:	None	:	False	:	False	:	NonNegativeReals
	13	:	0	:	1079.03	:	None	:	False	:	False	:	NonNegativeReals
	y	:	Size=11,	Index=J
	Key	:	Lower	:	Value	:	Upper	:	Fixed	:	Stale	:	Domain
	1	:	0	:	10100.4	:	None	:	False	:	False	:	NonNegativeReals
	2	:	0	:	0	:	None	:	False	:	False	:	NonNegativeReals
	3	:	0	:	3.22581	:	None	:	False	:	False	:	NonNegativeReals
	4	:	0	:	0	:	None	:	False	:	False	:	NonNegativeReals
	5	:	0	:	283	:	None	:	False	:	False	:	NonNegativeReals
	6	:	0	:	63	:	None	:	False	:	False	:	NonNegativeReals
	7	:	0	:	0.382514	:	None	:	False	:	False	:	NonNegativeReals
	8	:	0	:	0	:	None	:	False	:	False	:	NonNegativeReals
	9	:	0	:	62.272	:	None	:	False	:	False	:	NonNegativeReals
	10	:	0	:	482	:	None	:	False	:	False	:	NonNegativeReals
	11	:	0	:	0	:	None	:	False	:	False	:	NonNegativeReals
	w	:	Size=143,	Index=I*J
	Key	:	Lower	:	Value	:	Upper	:	Fixed	:	Stale	:	Domain
	(1,	1)	:	0	:	19495	:	None	:	False	:	False	:	NonNegativeReals
	(1,	2)	:	0	:	0	:	None	:	False	:	False	:	NonNegativeReals
	(1,	3)	:	0	:	0	:	None	:	False	:	False	:	NonNegativeReals
	(1,	4)	:	0	:	0	:	None	:	False	:	False	:	NonNegativeReals
	(1,	5)	:	0	:	0	:	None	:	False	:	False	:	NonNegativeReals
	(1,	6)	:	0	:	0	:	None	:	False	:	False	:	NonNegativeReals
	(1,	7)	:	0	:	0	:	None	:	False	:	False	:	NonNegativeReals
	(1,	8)	:	0	:	0	:	None	:	False	:	False	:	NonNegativeReals
	(1,	9)	:	0	:	0	:	None	:	False	:	False	:	NonNegativeReals
	(1,	10)	:	0	:	0	:	None	:	False	:	False	:	NonNegativeReals
	(1,	11)	:	0	:	0	:	None	:	False	:	False	:	NonNegativeReals
	(2,	1)	:	0	:	1653.88	:	None	:	False	:	False	:	NonNegativeReals
	(2,	2)	:	0	:	0	:	None	:	False	:	False	:	NonNegativeReals
	(2,	3)	:	0	:	0	:	None	:	False	:	False	:	NonNegativeReals
	(2,	4)	:	0	:	0	:	None	:	False	:	False	:	NonNegativeReals
	(2,	5)	:	0	:	0	:	None	:	False	:	False	:	NonNegativeReals
	(2,	6)	:	0	:	0	:	None	:	False	:	False	:	NonNegativeReals
	(2,	7)	:	0	:	0	:	None	:	False	:	False	:	NonNegativeReals
	(2,	8)	:	0	:	0	:	None	:	False	:	False	:	NonNegativeReals
	(2,	9)	:	0	:	0	:	None	:	False	:	False	:	NonNegativeReals
	(2,	10)	:	0	:	0	:	None	:	False	:	False	:	NonNegativeReals
	(2,	11)	:	0	:	0	:	None	:	False	:	False	:	NonNegativeReals
	(3,	1)	:	0	:	4647.06	:	None	:	False	:	False	:	NonNegativeReals
	(3,	2)	:	0	:	0	:	None	:	False	:	False	:	NonNegativeReals
	(3,	3)	:	0	:	0	:	None	:	False	:	False	:	NonNegativeReals
	(3,	4)	:	0	:	0	:	None	:	False	:	False	:	NonNegativeReals
	(3,	5)	:	0	:	0	:	None	:	False	:	False	:	NonNegativeReals
	(3,	6)	:	0	:	0	:	None	:	False	:	False	:	NonNegativeReals
	(3,	7)	:	0	:	0	:	None	:	False	:	False	:	NonNegativeReals
	(3,	8)	:	0	:	0	:	None	:	False	:	False	:	NonNegativeReals
	(3,	9)	:	0	:	0	:	None	:	False	:	False	:	NonNegativeReals
	(3,	10)	:	0	:	0	:	None	:	False	:	False	:	NonNegativeReals
	(3,	11)	:	0	:	0	:	None	:	False	:	False	:	NonNegativeReals
	(4,	1)	:	0	:	704.101	:	None	:	False	:	False	:	NonNegativeReals
	(4,	2)	:	0	:	0	:	None	:	False	:	False	:	NonNegativeReals
	(4,	3)	:	0	:	0	:	None	:	False	:	False	:	NonNegativeReals
	(4,	4)	:	0	:	0	:	None	:	False	:	False	:	NonNegativeReals
	(4,	5)	:	0	:	0	:	None	:	False	:	False	:	NonNegativeReals
	(4,	6)	:	0	:	0	:	None	:	False	:	False	:	NonNegativeReals
	(4,	7)	:	0	:	0	:	None	:	False	:	False	:	NonNegativeReals
	(4,	8)	:	0	:	0	:	None	:	False	:	False	:	NonNegativeReals
	(4,	9)	:	0	:	0	:	None	:	False	:	False	:	NonNegativeReals
	(4,	10)	:	0	:	0	:	None	:	False	:	False	:	NonNegativeReals
	(4,	11)	:	0	:	0	:	None	:	False	:	False	:	NonNegativeReals
	(5,	1)	:	0	:	6931.68	:	None	:	False	:	False	:	NonNegativeReals
	(5,	2)	:	0	:	0	:	None	:	False	:	False	:	NonNegativeReals
	(5,	3)	:	0	:	0	:	None	:	False	:	False	:	NonNegativeReals
	(5,	4)	:	0	:	0	:	None	:	False	:	False	:	NonNegativeReals
	(5,	5)	:	0	:	0	:	None	:	False	:	False	:	NonNegativeReals
	(5,	6)	:	0	:	0	:	None	:	False	:	False	:	NonNegativeReals
	(5,	7)	:	0	:	0	:	None	:	False	:	False	:	NonNegativeReals
	(5,	8)	:	0	:	0	:	None	:	False	:	False	:	NonNegativeReals
	(5,	9)	:	0	:	0	:	None	:	False	:	False	:	NonNegativeReals
	(5,	10)	:	0	:	0	:	None	:	False	:	False	:	NonNegativeReals
	(5,	11)	:	0	:	0	:	None	:	False	:	False	:	NonNegativeReals
	(6,	1)	:	0	:	3557.79	:	None	:	False	:	False	:	NonNegativeReals
	(6,	2)	:	0	:	0	:	None	:	False	:	False	:	NonNegativeReals
	(6,	3)	:	0	:	0	:	None	:	False	:	False	:	NonNegativeReals
	(6,	4)	:	0	:	0	:	None	:	False	:	False	:	NonNegativeReals
	(6,	5)	:	0	:	0	:	None	:	False	:	False	:	NonNegativeReals
	(6,	6)	:	0	:	0	:	None	:	False	:	False	:	NonNegativeReals
	(6,	7)	:	0	:	0	:	None	:	False	:	False	:	NonNegativeReals
	(6,	8)	:	0	:	0	:	None	:	False	:	False	:	NonNegativeReals
	(6,	9)	:	0	:	0	:	None	:	False	:	False	:	NonNegativeReals
	(6,	10)	:	0	:	0	:	None	:	False	:	False	:	NonNegativeReals
	(6,	11)	:	0	:	0	:	None	:	False	:	False	:	NonNegativeReals
	(7,	1)	:	0	:	176.227	:	None	:	False	:	False	:	NonNegativeReals
	(7,	2)	:	0	:	0	:	None	:	False	:	False	:	NonNegativeReals
	(7,	3)	:	0	:	0	:	None	:	False	:	False	:	NonNegativeReals
	(7,	4)	:	0	:	0	:	None	:	False	:	False	:	NonNegativeReals
	(7,	5)	:	0	:	0	:	None	:	False	:	False	:	NonNegativeReals
	(7,	6)	:	0	:	0	:	None	:	False	:	False	:	NonNegativeReals
	(7,	7)	:	0	:	0	:	None	:	False	:	False	:	NonNegativeReals
	(7,	8)	:	0	:	0	:	None	:	False	:	False	:	NonNegativeReals
	(7,	9)	:	0	:	0	:	None	:	False	:	False	:	NonNegativeReals
	(7,	10)	:	0	:	0	:	None	:	False	:	False	:	NonNegativeReals
	(7,	11)	:	0	:	0	:	None	:	False	:	False	:	NonNegativeReals
	(8,	1)	:	0	:	1725.94	:	None	:	False	:	False	:	NonNegativeReals
	(8,	2)	:	0	:	0	:	None	:	False	:	False	:	NonNegativeReals
	(8,	3)	:	0	:	4.56267	:	None	:	False	:	False	:	NonNegativeReals
	(8,	4)	:	0	:	0	:	None	:	False	:	False	:	NonNegativeReals
	(8,	5)	:	0	:	0	:	None	:	False	:	False	:	NonNegativeReals
	(8,	6)	:	0	:	0	:	None	:	False	:	False	:	NonNegativeReals
	(8,	7)	:	0	:	0	:	None	:	False	:	False	:	NonNegativeReals
	(8,	8)	:	0	:	0	:	None	:	False	:	False	:	NonNegativeReals
	(8,	9)	:	0	:	0	:	None	:	False	:	False	:	NonNegativeReals
	(8,	10)	:	0	:	0	:	None	:	False	:	False	:	NonNegativeReals
	(8,	11)	:	0	:	0	:	None	:	False	:	False	:	NonNegativeReals
	(9,	1)	:	0	:	9174.04	:	None	:	False	:	False	:	NonNegativeReals
	(9,	2)	:	0	:	0	:	None	:	False	:	False	:	NonNegativeReals
	(9,	3)	:	0	:	0	:	None	:	False	:	False	:	NonNegativeReals
	(9,	4)	:	0	:	0	:	None	:	False	:	False	:	NonNegativeReals
	(9,	5)	:	0	:	0	:	None	:	False	:	False	:	NonNegativeReals
	(9,	6)	:	0	:	0	:	None	:	False	:	False	:	NonNegativeReals
	(9,	7)	:	0	:	0	:	None	:	False	:	False	:	NonNegativeReals
	(9,	8)	:	0	:	0	:	None	:	False	:	False	:	NonNegativeReals
	(9,	9)	:	0	:	0	:	None	:	False	:	False	:	NonNegativeReals
	(9,	10)	:	0	:	0	:	None	:	False	:	False	:	NonNegativeReals
	(9,	11)	:	0	:	0	:	None	:	False	:	False	:	NonNegativeReals
	(10,	1)	:	0	:	666.258	:	None	:	False	:	False	:	NonNegativeReals
	(10,	2)	:	0	:	0	:	None	:	False	:	False	:	NonNegativeReals
	(10,	3)	:	0	:	0	:	None	:	False	:	False	:	NonNegativeReals
	(10,	4)	:	0	:	0	:	None	:	False	:	False	:	NonNegativeReals
	(10,	5)	:	0	:	0	:	None	:	False	:	False	:	NonNegativeReals
	(10,	6)	:	0	:	0	:	None	:	False	:	False	:	NonNegativeReals
	(10,	7)	:	0	:	0	:	None	:	False	:	False	:	NonNegativeReals
	(10,	8)	:	0	:	0	:	None	:	False	:	False	:	NonNegativeReals
	(10,	9)	:	0	:	126.56	:	None	:	False	:	False	:	NonNegativeReals
	(10,	10)	:	0	:	0	:	None	:	False	:	False	:	NonNegativeReals
	(10,	11)	:	0	:	0	:	None	:	False	:	False	:	NonNegativeReals
	(11,	1)	:	0	:	1850.46	:	None	:	False	:	False	:	NonNegativeReals
	(11,	2)	:	0	:	0	:	None	:	False	:	False	:	NonNegativeReals
	(11,	3)	:	0	:	0	:	None	:	False	:	False	:	NonNegativeReals
	(11,	4)	:	0	:	0	:	None	:	False	:	False	:	NonNegativeReals
	(11,	5)	:	0	:	0	:	None	:	False	:	False	:	NonNegativeReals
	(11,	6)	:	0	:	0	:	None	:	False	:	False	:	NonNegativeReals
	(11,	7)	:	0	:	0	:	None	:	False	:	False	:	NonNegativeReals
	(11,	8)	:	0	:	0	:	None	:	False	:	False	:	NonNegativeReals
	(11,	9)	:	0	:	0	:	None	:	False	:	False	:	NonNegativeReals
	(11,	10)	:	0	:	0	:	None	:	False	:	False	:	NonNegativeReals
	(11,	11)	:	0	:	0	:	None	:	False	:	False	:	NonNegativeReals
	(12,	1)	:	0	:	2139.22	:	None	:	False	:	False	:	NonNegativeReals
	(12,	2)	:	0	:	0	:	None	:	False	:	False	:	NonNegativeReals
	(12,	3)	:	0	:	0	:	None	:	False	:	False	:	NonNegativeReals
	(12,	4)	:	0	:	0	:	None	:	False	:	False	:	NonNegativeReals
	(12,	5)	:	0	:	9594.77	:	None	:	False	:	False	:	NonNegativeReals
	(12,	6)	:	0	:	188.018	:	None	:	False	:	False	:	NonNegativeReals
	(12,	7)	:	0	:	7.16805	:	None	:	False	:	False	:	NonNegativeReals
	(12,	8)	:	0	:	0	:	None	:	False	:	False	:	NonNegativeReals
	(12,	9)	:	0	:	0	:	None	:	False	:	False	:	NonNegativeReals
	(12,	10)	:	0	:	2268.53	:	None	:	False	:	False	:	NonNegativeReals
	(12,	11)	:	0	:	0	:	None	:	False	:	False	:	NonNegativeReals
	(13,	1)	:	0	:	1079.03	:	None	:	False	:	False	:	NonNegativeReals
	(13,	2)	:	0	:	0	:	None	:	False	:	False	:	NonNegativeReals
	(13,	3)	:	0	:	0	:	None	:	False	:	False	:	NonNegativeReals
	(13,	4)	:	0	:	0	:	None	:	False	:	False	:	NonNegativeReals
	(13,	5)	:	0	:	0	:	None	:	False	:	False	:	NonNegativeReals
	(13,	6)	:	0	:	0	:	None	:	False	:	False	:	NonNegativeReals
	(13,	7)	:	0	:	0	:	None	:	False	:	False	:	NonNegativeReals
	(13,	8)	:	0	:	0	:	None	:	False	:	False	:	NonNegativeReals
	(13,	9)	:	0	:	0	:	None	:	False	:	False	:	NonNegativeReals
	(13,	10)	:	0	:	0	:	None	:	False	:	False	:	NonNegativeReals
	(13,	11)	:	0	:	0	:	None	:	False	:	False	:	NonNegativeReals
	Objectives:
	obj	:	Size=1,	Index=None,	Active=True
	Key	:	Active	:	GWP	profit
	None	:	True	:	1.80528e+10	3.36685e+10
	Constraints:
	x_constraint	:	Size=13
	Key	:	Lower	:	Body	:	Upper
	1	:	0	:	0	:	0
	2	:	0	:	0	:	0
	3	:	0	:	0	:	0
	4	:	0	:	0	:	0
	5	:	0	:	0	:	0
	6	:	0	:	0	:	0
	7	:	0	:	0	:	0
	8	:	0	:	-1.59162e-12	:	0
	9	:	0	:	0	:	0
	10	:	0	:	0	:	0
	11	:	0	:	0	:	0
	12	:	0	:	-1.81899e-12	:	0
	13	:	0	:	0	:	0
	y_constraint	:	Size=11
	Key	:	Lower	:	Body	:	Upper
	1	:	0	:	-2.54659e-11	:	0
	2	:	0	:	0	:	0
	3	:	0	:	-3.9968e-15	:	0
	4	:	0	:	0	:	0
	5	:	0	:	-5.68434e-14	:	0
	6	:	0	:	5.68434e-14	:	0
	7	:	0	:	1.11022e-16	:	0
	8	:	0	:	0	:	0
	9	:	0	:	-1.35003e-13	:	0
	10	:	0	:	-6.25278e-13	:	0
	11	:	0	:	0	:	0
	y_demand_constraint	:	Size=11
	Key	:	Lower	:	Produced (1000t)	:	Demand (1000t)	percentage	profit (USD/Kiloton)	tot profit
ETHANOL	1	:	None	:	10100.4	:	45995	0.219598	749049	7.56569e+09
FURFURAL	2	:	None	:	0	:	22.2	0	1.44633e+07	0
HMF	3	:	None	:	3.22581	:	3.22581	1	7109070000	2.29325e+10
FDCA	4	:	None	:	0	:	150.572	0	844480000	0
ISOPRENE	5	:	None	:	283	:	283	1	457500	1.29472e+08
SUCCINIC ACID	6	:	None	:	63	:	63	1	1457000	91791000
3HP	7	:	None	:	0.382514	:	0.382514	1	7038170000	2.6922e+09
LEVULINIC ACID	8	:	None	:	0	:	1.50717	0	20340000	0
LACTIC ACID	9	:	None	:	62.272	:	62.272	1	410000	25531520
SORBITOL	10	:	None	:	482	:	482	1	480000	231360000
XYLITOL	11	:	None	:	0	:	40.625	0	6250000	0
	x_fleet_constraint	:	Size=13
	Key	:	Lower	:	Used (1000t)	:	Available (1000t)	percentage
corn	1	:	None	:	19495	:	19495	1
whole wheat	2	:	None	:	1653.88	:	1653.88	1
wheat bran	3	:	None	:	4647.06	:	4647.06	1
wheat germ	4	:	None	:	704.101	:	704.101	1
potato	5	:	None	:	6931.68	:	6931.68	1
tomato	6	:	None	:	3557.79	:	3557.79	1
tomato Pomace	7	:	None	:	176.227	:	176.227	1
sugarcane	8	:	None	:	1730.51	:	1730.51	1
sugarcane bagasse	9	:	None	:	9174.04	:	9174.04	1
sugarcane molasses	10	:	None	:	792.819	:	792.819	1
sugar beet	11	:	None	:	1850.46	:	1850.46	1
sugar beet pulp	12	:	None	:	14197.7	:	14197.7	1
sugar beet molasses	13	:	None	:	1079.03	:	1079.03	1

## Sheet: US_LP_Env_FL80
Model	unknown
	Variables:
	x	:	Size=13,	Index=I
	Key	:	Lower	:	Value	:	Upper	:	Fixed	:	Stale	:	Domain
	1	:	0	:	15596	:	None	:	FALSE	:	FALSE	:	NonNegativeReals
	2	:	0	:	1323.1	:	None	:	FALSE	:	FALSE	:	NonNegativeReals
	3	:	0	:	3717.65	:	None	:	FALSE	:	FALSE	:	NonNegativeReals
	4	:	0	:	563.28	:	None	:	FALSE	:	FALSE	:	NonNegativeReals
	5	:	0	:	5545.34	:	None	:	FALSE	:	FALSE	:	NonNegativeReals
	6	:	0	:	2846.23	:	None	:	FALSE	:	FALSE	:	NonNegativeReals
	7	:	0	:	140.982	:	None	:	FALSE	:	FALSE	:	NonNegativeReals
	8	:	0	:	1384.41	:	None	:	FALSE	:	FALSE	:	NonNegativeReals
	9	:	0	:	7339.23	:	None	:	FALSE	:	FALSE	:	NonNegativeReals
	10	:	0	:	634.255	:	None	:	FALSE	:	FALSE	:	NonNegativeReals
	11	:	0	:	1480.37	:	None	:	FALSE	:	FALSE	:	NonNegativeReals
	12	:	0	:	11358.2	:	None	:	FALSE	:	FALSE	:	NonNegativeReals
	13	:	0	:	863.22	:	None	:	FALSE	:	FALSE	:	NonNegativeReals
	y	:	Size=11,	Index=J
	Key	:	Lower	:	Value	:	Upper	:	Fixed	:	Stale	:	Domain
	1	:	0	:	7926.23	:	None	:	FALSE	:	FALSE	:	NonNegativeReals
	2	:	0	:	0	:	None	:	FALSE	:	FALSE	:	NonNegativeReals
	3	:	0	:	3.22581	:	None	:	FALSE	:	FALSE	:	NonNegativeReals
	4	:	0	:	0	:	None	:	FALSE	:	FALSE	:	NonNegativeReals
	5	:	0	:	283	:	None	:	FALSE	:	FALSE	:	NonNegativeReals
	6	:	0	:	63	:	None	:	FALSE	:	FALSE	:	NonNegativeReals
	7	:	0	:	0	:	None	:	FALSE	:	FALSE	:	NonNegativeReals
	8	:	0	:	0	:	None	:	FALSE	:	FALSE	:	NonNegativeReals
	9	:	0	:	62.272	:	None	:	FALSE	:	FALSE	:	NonNegativeReals
	10	:	0	:	482	:	None	:	FALSE	:	FALSE	:	NonNegativeReals
	11	:	0	:	0	:	None	:	FALSE	:	FALSE	:	NonNegativeReals
	w	:	Size=143,	Index=I*J
	Key	:	Lower	:	Value	:	Upper	:	Fixed	:	Stale	:	Domain
	(1,	1)	:	0	:	15596	:	None	:	FALSE	:	FALSE	:	NonNegativeReals
	(1,	2)	:	0	:	0	:	None	:	FALSE	:	FALSE	:	NonNegativeReals
	(1,	3)	:	0	:	0	:	None	:	FALSE	:	FALSE	:	NonNegativeReals
	(1,	4)	:	0	:	0	:	None	:	FALSE	:	FALSE	:	NonNegativeReals
	(1,	5)	:	0	:	0	:	None	:	FALSE	:	FALSE	:	NonNegativeReals
	(1,	6)	:	0	:	0	:	None	:	FALSE	:	FALSE	:	NonNegativeReals
	(1,	7)	:	0	:	0	:	None	:	FALSE	:	FALSE	:	NonNegativeReals
	(1,	8)	:	0	:	0	:	None	:	FALSE	:	FALSE	:	NonNegativeReals
	(1,	9)	:	0	:	0	:	None	:	FALSE	:	FALSE	:	NonNegativeReals
	(1,	10)	:	0	:	0	:	None	:	FALSE	:	FALSE	:	NonNegativeReals
	(1,	11)	:	0	:	0	:	None	:	FALSE	:	FALSE	:	NonNegativeReals
	(2,	1)	:	0	:	1323.1	:	None	:	FALSE	:	FALSE	:	NonNegativeReals
	(2,	2)	:	0	:	0	:	None	:	FALSE	:	FALSE	:	NonNegativeReals
	(2,	3)	:	0	:	0	:	None	:	FALSE	:	FALSE	:	NonNegativeReals
	(2,	4)	:	0	:	0	:	None	:	FALSE	:	FALSE	:	NonNegativeReals
	(2,	5)	:	0	:	0	:	None	:	FALSE	:	FALSE	:	NonNegativeReals
	(2,	6)	:	0	:	0	:	None	:	FALSE	:	FALSE	:	NonNegativeReals
	(2,	7)	:	0	:	0	:	None	:	FALSE	:	FALSE	:	NonNegativeReals
	(2,	8)	:	0	:	0	:	None	:	FALSE	:	FALSE	:	NonNegativeReals
	(2,	9)	:	0	:	0	:	None	:	FALSE	:	FALSE	:	NonNegativeReals
	(2,	10)	:	0	:	0	:	None	:	FALSE	:	FALSE	:	NonNegativeReals
	(2,	11)	:	0	:	0	:	None	:	FALSE	:	FALSE	:	NonNegativeReals
	(3,	1)	:	0	:	3717.65	:	None	:	FALSE	:	FALSE	:	NonNegativeReals
	(3,	2)	:	0	:	0	:	None	:	FALSE	:	FALSE	:	NonNegativeReals
	(3,	3)	:	0	:	0	:	None	:	FALSE	:	FALSE	:	NonNegativeReals
	(3,	4)	:	0	:	0	:	None	:	FALSE	:	FALSE	:	NonNegativeReals
	(3,	5)	:	0	:	0	:	None	:	FALSE	:	FALSE	:	NonNegativeReals
	(3,	6)	:	0	:	0	:	None	:	FALSE	:	FALSE	:	NonNegativeReals
	(3,	7)	:	0	:	0	:	None	:	FALSE	:	FALSE	:	NonNegativeReals
	(3,	8)	:	0	:	0	:	None	:	FALSE	:	FALSE	:	NonNegativeReals
	(3,	9)	:	0	:	0	:	None	:	FALSE	:	FALSE	:	NonNegativeReals
	(3,	10)	:	0	:	0	:	None	:	FALSE	:	FALSE	:	NonNegativeReals
	(3,	11)	:	0	:	0	:	None	:	FALSE	:	FALSE	:	NonNegativeReals
	(4,	1)	:	0	:	143.94	:	None	:	FALSE	:	FALSE	:	NonNegativeReals
	(4,	2)	:	0	:	0	:	None	:	FALSE	:	FALSE	:	NonNegativeReals
	(4,	3)	:	0	:	0	:	None	:	FALSE	:	FALSE	:	NonNegativeReals
	(4,	4)	:	0	:	0	:	None	:	FALSE	:	FALSE	:	NonNegativeReals
	(4,	5)	:	0	:	419.34	:	None	:	FALSE	:	FALSE	:	NonNegativeReals
	(4,	6)	:	0	:	0	:	None	:	FALSE	:	FALSE	:	NonNegativeReals
	(4,	7)	:	0	:	0	:	None	:	FALSE	:	FALSE	:	NonNegativeReals
	(4,	8)	:	0	:	0	:	None	:	FALSE	:	FALSE	:	NonNegativeReals
	(4,	9)	:	0	:	0	:	None	:	FALSE	:	FALSE	:	NonNegativeReals
	(4,	10)	:	0	:	0	:	None	:	FALSE	:	FALSE	:	NonNegativeReals
	(4,	11)	:	0	:	0	:	None	:	FALSE	:	FALSE	:	NonNegativeReals
	(5,	1)	:	0	:	5545.34	:	None	:	FALSE	:	FALSE	:	NonNegativeReals
	(5,	2)	:	0	:	0	:	None	:	FALSE	:	FALSE	:	NonNegativeReals
	(5,	3)	:	0	:	0	:	None	:	FALSE	:	FALSE	:	NonNegativeReals
	(5,	4)	:	0	:	0	:	None	:	FALSE	:	FALSE	:	NonNegativeReals
	(5,	5)	:	0	:	0	:	None	:	FALSE	:	FALSE	:	NonNegativeReals
	(5,	6)	:	0	:	0	:	None	:	FALSE	:	FALSE	:	NonNegativeReals
	(5,	7)	:	0	:	0	:	None	:	FALSE	:	FALSE	:	NonNegativeReals
	(5,	8)	:	0	:	0	:	None	:	FALSE	:	FALSE	:	NonNegativeReals
	(5,	9)	:	0	:	0	:	None	:	FALSE	:	FALSE	:	NonNegativeReals
	(5,	10)	:	0	:	0	:	None	:	FALSE	:	FALSE	:	NonNegativeReals
	(5,	11)	:	0	:	0	:	None	:	FALSE	:	FALSE	:	NonNegativeReals
	(6,	1)	:	0	:	2846.23	:	None	:	FALSE	:	FALSE	:	NonNegativeReals
	(6,	2)	:	0	:	0	:	None	:	FALSE	:	FALSE	:	NonNegativeReals
	(6,	3)	:	0	:	0	:	None	:	FALSE	:	FALSE	:	NonNegativeReals
	(6,	4)	:	0	:	0	:	None	:	FALSE	:	FALSE	:	NonNegativeReals
	(6,	5)	:	0	:	0	:	None	:	FALSE	:	FALSE	:	NonNegativeReals
	(6,	6)	:	0	:	0	:	None	:	FALSE	:	FALSE	:	NonNegativeReals
	(6,	7)	:	0	:	0	:	None	:	FALSE	:	FALSE	:	NonNegativeReals
	(6,	8)	:	0	:	0	:	None	:	FALSE	:	FALSE	:	NonNegativeReals
	(6,	9)	:	0	:	0	:	None	:	FALSE	:	FALSE	:	NonNegativeReals
	(6,	10)	:	0	:	0	:	None	:	FALSE	:	FALSE	:	NonNegativeReals
	(6,	11)	:	0	:	0	:	None	:	FALSE	:	FALSE	:	NonNegativeReals
	(7,	1)	:	0	:	140.982	:	None	:	FALSE	:	FALSE	:	NonNegativeReals
	(7,	2)	:	0	:	0	:	None	:	FALSE	:	FALSE	:	NonNegativeReals
	(7,	3)	:	0	:	0	:	None	:	FALSE	:	FALSE	:	NonNegativeReals
	(7,	4)	:	0	:	0	:	None	:	FALSE	:	FALSE	:	NonNegativeReals
	(7,	5)	:	0	:	0	:	None	:	FALSE	:	FALSE	:	NonNegativeReals
	(7,	6)	:	0	:	0	:	None	:	FALSE	:	FALSE	:	NonNegativeReals
	(7,	7)	:	0	:	0	:	None	:	FALSE	:	FALSE	:	NonNegativeReals
	(7,	8)	:	0	:	0	:	None	:	FALSE	:	FALSE	:	NonNegativeReals
	(7,	9)	:	0	:	0	:	None	:	FALSE	:	FALSE	:	NonNegativeReals
	(7,	10)	:	0	:	0	:	None	:	FALSE	:	FALSE	:	NonNegativeReals
	(7,	11)	:	0	:	0	:	None	:	FALSE	:	FALSE	:	NonNegativeReals
	(8,	1)	:	0	:	1379.84	:	None	:	FALSE	:	FALSE	:	NonNegativeReals
	(8,	2)	:	0	:	0	:	None	:	FALSE	:	FALSE	:	NonNegativeReals
	(8,	3)	:	0	:	4.56267	:	None	:	FALSE	:	FALSE	:	NonNegativeReals
	(8,	4)	:	0	:	0	:	None	:	FALSE	:	FALSE	:	NonNegativeReals
	(8,	5)	:	0	:	0	:	None	:	FALSE	:	FALSE	:	NonNegativeReals
	(8,	6)	:	0	:	0	:	None	:	FALSE	:	FALSE	:	NonNegativeReals
	(8,	7)	:	0	:	0	:	None	:	FALSE	:	FALSE	:	NonNegativeReals
	(8,	8)	:	0	:	0	:	None	:	FALSE	:	FALSE	:	NonNegativeReals
	(8,	9)	:	0	:	0	:	None	:	FALSE	:	FALSE	:	NonNegativeReals
	(8,	10)	:	0	:	0	:	None	:	FALSE	:	FALSE	:	NonNegativeReals
	(8,	11)	:	0	:	0	:	None	:	FALSE	:	FALSE	:	NonNegativeReals
	(9,	1)	:	0	:	7339.23	:	None	:	FALSE	:	FALSE	:	NonNegativeReals
	(9,	2)	:	0	:	0	:	None	:	FALSE	:	FALSE	:	NonNegativeReals
	(9,	3)	:	0	:	0	:	None	:	FALSE	:	FALSE	:	NonNegativeReals
	(9,	4)	:	0	:	0	:	None	:	FALSE	:	FALSE	:	NonNegativeReals
	(9,	5)	:	0	:	0	:	None	:	FALSE	:	FALSE	:	NonNegativeReals
	(9,	6)	:	0	:	0	:	None	:	FALSE	:	FALSE	:	NonNegativeReals
	(9,	7)	:	0	:	0	:	None	:	FALSE	:	FALSE	:	NonNegativeReals
	(9,	8)	:	0	:	0	:	None	:	FALSE	:	FALSE	:	NonNegativeReals
	(9,	9)	:	0	:	0	:	None	:	FALSE	:	FALSE	:	NonNegativeReals
	(9,	10)	:	0	:	0	:	None	:	FALSE	:	FALSE	:	NonNegativeReals
	(9,	11)	:	0	:	0	:	None	:	FALSE	:	FALSE	:	NonNegativeReals
	(10,	1)	:	0	:	355.048	:	None	:	FALSE	:	FALSE	:	NonNegativeReals
	(10,	2)	:	0	:	0	:	None	:	FALSE	:	FALSE	:	NonNegativeReals
	(10,	3)	:	0	:	0	:	None	:	FALSE	:	FALSE	:	NonNegativeReals
	(10,	4)	:	0	:	0	:	None	:	FALSE	:	FALSE	:	NonNegativeReals
	(10,	5)	:	0	:	0	:	None	:	FALSE	:	FALSE	:	NonNegativeReals
	(10,	6)	:	0	:	152.647	:	None	:	FALSE	:	FALSE	:	NonNegativeReals
	(10,	7)	:	0	:	0	:	None	:	FALSE	:	FALSE	:	NonNegativeReals
	(10,	8)	:	0	:	0	:	None	:	FALSE	:	FALSE	:	NonNegativeReals
	(10,	9)	:	0	:	126.56	:	None	:	FALSE	:	FALSE	:	NonNegativeReals
	(10,	10)	:	0	:	0	:	None	:	FALSE	:	FALSE	:	NonNegativeReals
	(10,	11)	:	0	:	0	:	None	:	FALSE	:	FALSE	:	NonNegativeReals
	(11,	1)	:	0	:	1480.37	:	None	:	FALSE	:	FALSE	:	NonNegativeReals
	(11,	2)	:	0	:	0	:	None	:	FALSE	:	FALSE	:	NonNegativeReals
	(11,	3)	:	0	:	0	:	None	:	FALSE	:	FALSE	:	NonNegativeReals
	(11,	4)	:	0	:	0	:	None	:	FALSE	:	FALSE	:	NonNegativeReals
	(11,	5)	:	0	:	0	:	None	:	FALSE	:	FALSE	:	NonNegativeReals
	(11,	6)	:	0	:	0	:	None	:	FALSE	:	FALSE	:	NonNegativeReals
	(11,	7)	:	0	:	0	:	None	:	FALSE	:	FALSE	:	NonNegativeReals
	(11,	8)	:	0	:	0	:	None	:	FALSE	:	FALSE	:	NonNegativeReals
	(11,	9)	:	0	:	0	:	None	:	FALSE	:	FALSE	:	NonNegativeReals
	(11,	10)	:	0	:	0	:	None	:	FALSE	:	FALSE	:	NonNegativeReals
	(11,	11)	:	0	:	0	:	None	:	FALSE	:	FALSE	:	NonNegativeReals
	(12,	1)	:	0	:	0	:	None	:	FALSE	:	FALSE	:	NonNegativeReals
	(12,	2)	:	0	:	0	:	None	:	FALSE	:	FALSE	:	NonNegativeReals
	(12,	3)	:	0	:	0	:	None	:	FALSE	:	FALSE	:	NonNegativeReals
	(12,	4)	:	0	:	0	:	None	:	FALSE	:	FALSE	:	NonNegativeReals
	(12,	5)	:	0	:	9089.63	:	None	:	FALSE	:	FALSE	:	NonNegativeReals
	(12,	6)	:	0	:	0	:	None	:	FALSE	:	FALSE	:	NonNegativeReals
	(12,	7)	:	0	:	0	:	None	:	FALSE	:	FALSE	:	NonNegativeReals
	(12,	8)	:	0	:	0	:	None	:	FALSE	:	FALSE	:	NonNegativeReals
	(12,	9)	:	0	:	0	:	None	:	FALSE	:	FALSE	:	NonNegativeReals
	(12,	10)	:	0	:	2268.53	:	None	:	FALSE	:	FALSE	:	NonNegativeReals
	(12,	11)	:	0	:	0	:	None	:	FALSE	:	FALSE	:	NonNegativeReals
	(13,	1)	:	0	:	863.22	:	None	:	FALSE	:	FALSE	:	NonNegativeReals
	(13,	2)	:	0	:	0	:	None	:	FALSE	:	FALSE	:	NonNegativeReals
	(13,	3)	:	0	:	0	:	None	:	FALSE	:	FALSE	:	NonNegativeReals
	(13,	4)	:	0	:	0	:	None	:	FALSE	:	FALSE	:	NonNegativeReals
	(13,	5)	:	0	:	0	:	None	:	FALSE	:	FALSE	:	NonNegativeReals
	(13,	6)	:	0	:	0	:	None	:	FALSE	:	FALSE	:	NonNegativeReals
	(13,	7)	:	0	:	0	:	None	:	FALSE	:	FALSE	:	NonNegativeReals
	(13,	8)	:	0	:	0	:	None	:	FALSE	:	FALSE	:	NonNegativeReals
	(13,	9)	:	0	:	0	:	None	:	FALSE	:	FALSE	:	NonNegativeReals
	(13,	10)	:	0	:	0	:	None	:	FALSE	:	FALSE	:	NonNegativeReals
	(13,	11)	:	0	:	0	:	None	:	FALSE	:	FALSE	:	NonNegativeReals
	Objectives:
	obj	:	Size=1,	Index=None,	Active=True
	Key	:	Active	:	GWP	profit
	None	:	TRUE	:	1.49587e+10	2.93478e+10
	Constraints:
	x_constraint	:	Size=13
	Key	:	Lower	:	Body	:	Upper
	1	:	0	:	0	:	0
	2	:	0	:	0	:	0
	3	:	0	:	0	:	0
	4	:	0	:	-1.02318e-12	:	0
	5	:	0	:	0	:	0
	6	:	0	:	0	:	0
	7	:	0	:	0	:	0
	8	:	0	:	-1.81899e-12	:	0
	9	:	0	:	0	:	0
	10	:	0	:	-1.02318e-12	:	0
	11	:	0	:	0	:	0
	12	:	0	:	-1.09139e-11	:	0
	13	:	0	:	0	:	0
	y_constraint	:	Size=11
	Key	:	Lower	:	Body	:	Upper
	1	:	0	:	4.54747e-12	:	0
	2	:	0	:	0	:	0
	3	:	0	:	-3.9968e-15	:	0
	4	:	0	:	0	:	0
	5	:	0	:	-1.7053e-13	:	0
	6	:	0	:	-5.68434e-14	:	0
	7	:	0	:	0	:	0
	8	:	0	:	0	:	0
	9	:	0	:	-1.35003e-13	:	0
	10	:	0	:	-6.25278e-13	:	0
	11	:	0	:	0	:	0
	y_demand_constraint	:	Size=11
	Key	:	Lower	:	Body	:	Upper	percentage	profit (USD/Kiloton)	tot profit
	1	:	None	:	7926.23	:	45995	0.172328	749049	5.93714e+09
	2	:	None	:	0	:	22.2	0	1.44633e+07	0
	3	:	None	:	3.22581	:	3.22581	1	7109070000	2.29325e+10
	4	:	None	:	0	:	150.572	0	844480000	0
	5	:	None	:	283	:	283	1	457500	1.29472e+08
	6	:	None	:	63	:	63	1	1457000	91791000
	7	:	None	:	0	:	0.382514	0	7038170000	0
	8	:	None	:	0	:	1.50717	0	20340000	0
	9	:	None	:	62.272	:	62.272	1	410000	25531520
	10	:	None	:	482	:	482	1	480000	231360000
	11	:	None	:	0	:	40.625	0	6250000	0
	x_fleet_constraint	:	Size=13
	Key	:	Lower	:	Body	:	Upper
	1	:	None	:	15596	:	15596
	2	:	None	:	1323.1	:	1323.1
	3	:	None	:	3717.65	:	3717.65
	4	:	None	:	563.28	:	563.28
	5	:	None	:	5545.34	:	5545.34
	6	:	None	:	2846.23	:	2846.23
	7	:	None	:	140.982	:	140.982
	8	:	None	:	1384.41	:	1384.41
	9	:	None	:	7339.23	:	7339.23
	10	:	None	:	634.255	:	634.255
	11	:	None	:	1480.37	:	1480.37
	12	:	None	:	11358.2	:	11358.2
	13	:	None	:	863.22	:	863.22

## Sheet: US_LP_Env_FL120
Model	unknown
	Variables:
	x	:	Size=13,	Index=I
	Key	:	Lower	:	Value	:	Upper	:	Fixed	:	Stale	:	Domain
	1	:	0	:	23394.1	:	None	:	FALSE	:	FALSE	:	NonNegativeReals
	2	:	0	:	1984.65	:	None	:	FALSE	:	FALSE	:	NonNegativeReals
	3	:	0	:	5576.48	:	None	:	FALSE	:	FALSE	:	NonNegativeReals
	4	:	0	:	844.921	:	None	:	FALSE	:	FALSE	:	NonNegativeReals
	5	:	0	:	8318.02	:	None	:	FALSE	:	FALSE	:	NonNegativeReals
	6	:	0	:	4269.35	:	None	:	FALSE	:	FALSE	:	NonNegativeReals
	7	:	0	:	211.473	:	None	:	FALSE	:	FALSE	:	NonNegativeReals
	8	:	0	:	2076.61	:	None	:	FALSE	:	FALSE	:	NonNegativeReals
	9	:	0	:	11008.9	:	None	:	FALSE	:	FALSE	:	NonNegativeReals
	10	:	0	:	951.382	:	None	:	FALSE	:	FALSE	:	NonNegativeReals
	11	:	0	:	2220.55	:	None	:	FALSE	:	FALSE	:	NonNegativeReals
	12	:	0	:	17037.2	:	None	:	FALSE	:	FALSE	:	NonNegativeReals
	13	:	0	:	1294.83	:	None	:	FALSE	:	FALSE	:	NonNegativeReals
	y	:	Size=11,	Index=J
	Key	:	Lower	:	Value	:	Upper	:	Fixed	:	Stale	:	Domain
	1	:	0	:	12252.1	:	None	:	FALSE	:	FALSE	:	NonNegativeReals
	2	:	0	:	0	:	None	:	FALSE	:	FALSE	:	NonNegativeReals
	3	:	0	:	3.22581	:	None	:	FALSE	:	FALSE	:	NonNegativeReals
	4	:	0	:	0	:	None	:	FALSE	:	FALSE	:	NonNegativeReals
	5	:	0	:	283	:	None	:	FALSE	:	FALSE	:	NonNegativeReals
	6	:	0	:	63	:	None	:	FALSE	:	FALSE	:	NonNegativeReals
	7	:	0	:	0.382514	:	None	:	FALSE	:	FALSE	:	NonNegativeReals
	8	:	0	:	0	:	None	:	FALSE	:	FALSE	:	NonNegativeReals
	9	:	0	:	62.272	:	None	:	FALSE	:	FALSE	:	NonNegativeReals
	10	:	0	:	482	:	None	:	FALSE	:	FALSE	:	NonNegativeReals
	11	:	0	:	0	:	None	:	FALSE	:	FALSE	:	NonNegativeReals
	w	:	Size=143,	Index=I*J
	Key	:	Lower	:	Value	:	Upper	:	Fixed	:	Stale	:	Domain
	(1,	1)	:	0	:	23394.1	:	None	:	FALSE	:	FALSE	:	NonNegativeReals
	(1,	2)	:	0	:	0	:	None	:	FALSE	:	FALSE	:	NonNegativeReals
	(1,	3)	:	0	:	0	:	None	:	FALSE	:	FALSE	:	NonNegativeReals
	(1,	4)	:	0	:	0	:	None	:	FALSE	:	FALSE	:	NonNegativeReals
	(1,	5)	:	0	:	0	:	None	:	FALSE	:	FALSE	:	NonNegativeReals
	(1,	6)	:	0	:	0	:	None	:	FALSE	:	FALSE	:	NonNegativeReals
	(1,	7)	:	0	:	0	:	None	:	FALSE	:	FALSE	:	NonNegativeReals
	(1,	8)	:	0	:	0	:	None	:	FALSE	:	FALSE	:	NonNegativeReals
	(1,	9)	:	0	:	0	:	None	:	FALSE	:	FALSE	:	NonNegativeReals
	(1,	10)	:	0	:	0	:	None	:	FALSE	:	FALSE	:	NonNegativeReals
	(1,	11)	:	0	:	0	:	None	:	FALSE	:	FALSE	:	NonNegativeReals
	(2,	1)	:	0	:	1984.65	:	None	:	FALSE	:	FALSE	:	NonNegativeReals
	(2,	2)	:	0	:	0	:	None	:	FALSE	:	FALSE	:	NonNegativeReals
	(2,	3)	:	0	:	0	:	None	:	FALSE	:	FALSE	:	NonNegativeReals
	(2,	4)	:	0	:	0	:	None	:	FALSE	:	FALSE	:	NonNegativeReals
	(2,	5)	:	0	:	0	:	None	:	FALSE	:	FALSE	:	NonNegativeReals
	(2,	6)	:	0	:	0	:	None	:	FALSE	:	FALSE	:	NonNegativeReals
	(2,	7)	:	0	:	0	:	None	:	FALSE	:	FALSE	:	NonNegativeReals
	(2,	8)	:	0	:	0	:	None	:	FALSE	:	FALSE	:	NonNegativeReals
	(2,	9)	:	0	:	0	:	None	:	FALSE	:	FALSE	:	NonNegativeReals
	(2,	10)	:	0	:	0	:	None	:	FALSE	:	FALSE	:	NonNegativeReals
	(2,	11)	:	0	:	0	:	None	:	FALSE	:	FALSE	:	NonNegativeReals
	(3,	1)	:	0	:	5576.48	:	None	:	FALSE	:	FALSE	:	NonNegativeReals
	(3,	2)	:	0	:	0	:	None	:	FALSE	:	FALSE	:	NonNegativeReals
	(3,	3)	:	0	:	0	:	None	:	FALSE	:	FALSE	:	NonNegativeReals
	(3,	4)	:	0	:	0	:	None	:	FALSE	:	FALSE	:	NonNegativeReals
	(3,	5)	:	0	:	0	:	None	:	FALSE	:	FALSE	:	NonNegativeReals
	(3,	6)	:	0	:	0	:	None	:	FALSE	:	FALSE	:	NonNegativeReals
	(3,	7)	:	0	:	0	:	None	:	FALSE	:	FALSE	:	NonNegativeReals
	(3,	8)	:	0	:	0	:	None	:	FALSE	:	FALSE	:	NonNegativeReals
	(3,	9)	:	0	:	0	:	None	:	FALSE	:	FALSE	:	NonNegativeReals
	(3,	10)	:	0	:	0	:	None	:	FALSE	:	FALSE	:	NonNegativeReals
	(3,	11)	:	0	:	0	:	None	:	FALSE	:	FALSE	:	NonNegativeReals
	(4,	1)	:	0	:	844.921	:	None	:	FALSE	:	FALSE	:	NonNegativeReals
	(4,	2)	:	0	:	0	:	None	:	FALSE	:	FALSE	:	NonNegativeReals
	(4,	3)	:	0	:	0	:	None	:	FALSE	:	FALSE	:	NonNegativeReals
	(4,	4)	:	0	:	0	:	None	:	FALSE	:	FALSE	:	NonNegativeReals
	(4,	5)	:	0	:	0	:	None	:	FALSE	:	FALSE	:	NonNegativeReals
	(4,	6)	:	0	:	0	:	None	:	FALSE	:	FALSE	:	NonNegativeReals
	(4,	7)	:	0	:	0	:	None	:	FALSE	:	FALSE	:	NonNegativeReals
	(4,	8)	:	0	:	0	:	None	:	FALSE	:	FALSE	:	NonNegativeReals
	(4,	9)	:	0	:	0	:	None	:	FALSE	:	FALSE	:	NonNegativeReals
	(4,	10)	:	0	:	0	:	None	:	FALSE	:	FALSE	:	NonNegativeReals
	(4,	11)	:	0	:	0	:	None	:	FALSE	:	FALSE	:	NonNegativeReals
	(5,	1)	:	0	:	8318.02	:	None	:	FALSE	:	FALSE	:	NonNegativeReals
	(5,	2)	:	0	:	0	:	None	:	FALSE	:	FALSE	:	NonNegativeReals
	(5,	3)	:	0	:	0	:	None	:	FALSE	:	FALSE	:	NonNegativeReals
	(5,	4)	:	0	:	0	:	None	:	FALSE	:	FALSE	:	NonNegativeReals
	(5,	5)	:	0	:	0	:	None	:	FALSE	:	FALSE	:	NonNegativeReals
	(5,	6)	:	0	:	0	:	None	:	FALSE	:	FALSE	:	NonNegativeReals
	(5,	7)	:	0	:	0	:	None	:	FALSE	:	FALSE	:	NonNegativeReals
	(5,	8)	:	0	:	0	:	None	:	FALSE	:	FALSE	:	NonNegativeReals
	(5,	9)	:	0	:	0	:	None	:	FALSE	:	FALSE	:	NonNegativeReals
	(5,	10)	:	0	:	0	:	None	:	FALSE	:	FALSE	:	NonNegativeReals
	(5,	11)	:	0	:	0	:	None	:	FALSE	:	FALSE	:	NonNegativeReals
	(6,	1)	:	0	:	4269.35	:	None	:	FALSE	:	FALSE	:	NonNegativeReals
	(6,	2)	:	0	:	0	:	None	:	FALSE	:	FALSE	:	NonNegativeReals
	(6,	3)	:	0	:	0	:	None	:	FALSE	:	FALSE	:	NonNegativeReals
	(6,	4)	:	0	:	0	:	None	:	FALSE	:	FALSE	:	NonNegativeReals
	(6,	5)	:	0	:	0	:	None	:	FALSE	:	FALSE	:	NonNegativeReals
	(6,	6)	:	0	:	0	:	None	:	FALSE	:	FALSE	:	NonNegativeReals
	(6,	7)	:	0	:	0	:	None	:	FALSE	:	FALSE	:	NonNegativeReals
	(6,	8)	:	0	:	0	:	None	:	FALSE	:	FALSE	:	NonNegativeReals
	(6,	9)	:	0	:	0	:	None	:	FALSE	:	FALSE	:	NonNegativeReals
	(6,	10)	:	0	:	0	:	None	:	FALSE	:	FALSE	:	NonNegativeReals
	(6,	11)	:	0	:	0	:	None	:	FALSE	:	FALSE	:	NonNegativeReals
	(7,	1)	:	0	:	211.473	:	None	:	FALSE	:	FALSE	:	NonNegativeReals
	(7,	2)	:	0	:	0	:	None	:	FALSE	:	FALSE	:	NonNegativeReals
	(7,	3)	:	0	:	0	:	None	:	FALSE	:	FALSE	:	NonNegativeReals
	(7,	4)	:	0	:	0	:	None	:	FALSE	:	FALSE	:	NonNegativeReals
	(7,	5)	:	0	:	0	:	None	:	FALSE	:	FALSE	:	NonNegativeReals
	(7,	6)	:	0	:	0	:	None	:	FALSE	:	FALSE	:	NonNegativeReals
	(7,	7)	:	0	:	0	:	None	:	FALSE	:	FALSE	:	NonNegativeReals
	(7,	8)	:	0	:	0	:	None	:	FALSE	:	FALSE	:	NonNegativeReals
	(7,	9)	:	0	:	0	:	None	:	FALSE	:	FALSE	:	NonNegativeReals
	(7,	10)	:	0	:	0	:	None	:	FALSE	:	FALSE	:	NonNegativeReals
	(7,	11)	:	0	:	0	:	None	:	FALSE	:	FALSE	:	NonNegativeReals
	(8,	1)	:	0	:	2072.05	:	None	:	FALSE	:	FALSE	:	NonNegativeReals
	(8,	2)	:	0	:	0	:	None	:	FALSE	:	FALSE	:	NonNegativeReals
	(8,	3)	:	0	:	4.56267	:	None	:	FALSE	:	FALSE	:	NonNegativeReals
	(8,	4)	:	0	:	0	:	None	:	FALSE	:	FALSE	:	NonNegativeReals
	(8,	5)	:	0	:	0	:	None	:	FALSE	:	FALSE	:	NonNegativeReals
	(8,	6)	:	0	:	0	:	None	:	FALSE	:	FALSE	:	NonNegativeReals
	(8,	7)	:	0	:	0	:	None	:	FALSE	:	FALSE	:	NonNegativeReals
	(8,	8)	:	0	:	0	:	None	:	FALSE	:	FALSE	:	NonNegativeReals
	(8,	9)	:	0	:	0	:	None	:	FALSE	:	FALSE	:	NonNegativeReals
	(8,	10)	:	0	:	0	:	None	:	FALSE	:	FALSE	:	NonNegativeReals
	(8,	11)	:	0	:	0	:	None	:	FALSE	:	FALSE	:	NonNegativeReals
	(9,	1)	:	0	:	11008.9	:	None	:	FALSE	:	FALSE	:	NonNegativeReals
	(9,	2)	:	0	:	0	:	None	:	FALSE	:	FALSE	:	NonNegativeReals
	(9,	3)	:	0	:	0	:	None	:	FALSE	:	FALSE	:	NonNegativeReals
	(9,	4)	:	0	:	0	:	None	:	FALSE	:	FALSE	:	NonNegativeReals
	(9,	5)	:	0	:	0	:	None	:	FALSE	:	FALSE	:	NonNegativeReals
	(9,	6)	:	0	:	0	:	None	:	FALSE	:	FALSE	:	NonNegativeReals
	(9,	7)	:	0	:	0	:	None	:	FALSE	:	FALSE	:	NonNegativeReals
	(9,	8)	:	0	:	0	:	None	:	FALSE	:	FALSE	:	NonNegativeReals
	(9,	9)	:	0	:	0	:	None	:	FALSE	:	FALSE	:	NonNegativeReals
	(9,	10)	:	0	:	0	:	None	:	FALSE	:	FALSE	:	NonNegativeReals
	(9,	11)	:	0	:	0	:	None	:	FALSE	:	FALSE	:	NonNegativeReals
	(10,	1)	:	0	:	824.822	:	None	:	FALSE	:	FALSE	:	NonNegativeReals
	(10,	2)	:	0	:	0	:	None	:	FALSE	:	FALSE	:	NonNegativeReals
	(10,	3)	:	0	:	0	:	None	:	FALSE	:	FALSE	:	NonNegativeReals
	(10,	4)	:	0	:	0	:	None	:	FALSE	:	FALSE	:	NonNegativeReals
	(10,	5)	:	0	:	0	:	None	:	FALSE	:	FALSE	:	NonNegativeReals
	(10,	6)	:	0	:	0	:	None	:	FALSE	:	FALSE	:	NonNegativeReals
	(10,	7)	:	0	:	0	:	None	:	FALSE	:	FALSE	:	NonNegativeReals
	(10,	8)	:	0	:	0	:	None	:	FALSE	:	FALSE	:	NonNegativeReals
	(10,	9)	:	0	:	126.56	:	None	:	FALSE	:	FALSE	:	NonNegativeReals
	(10,	10)	:	0	:	0	:	None	:	FALSE	:	FALSE	:	NonNegativeReals
	(10,	11)	:	0	:	0	:	None	:	FALSE	:	FALSE	:	NonNegativeReals
	(11,	1)	:	0	:	2220.55	:	None	:	FALSE	:	FALSE	:	NonNegativeReals
	(11,	2)	:	0	:	0	:	None	:	FALSE	:	FALSE	:	NonNegativeReals
	(11,	3)	:	0	:	0	:	None	:	FALSE	:	FALSE	:	NonNegativeReals
	(11,	4)	:	0	:	0	:	None	:	FALSE	:	FALSE	:	NonNegativeReals
	(11,	5)	:	0	:	0	:	None	:	FALSE	:	FALSE	:	NonNegativeReals
	(11,	6)	:	0	:	0	:	None	:	FALSE	:	FALSE	:	NonNegativeReals
	(11,	7)	:	0	:	0	:	None	:	FALSE	:	FALSE	:	NonNegativeReals
	(11,	8)	:	0	:	0	:	None	:	FALSE	:	FALSE	:	NonNegativeReals
	(11,	9)	:	0	:	0	:	None	:	FALSE	:	FALSE	:	NonNegativeReals
	(11,	10)	:	0	:	0	:	None	:	FALSE	:	FALSE	:	NonNegativeReals
	(11,	11)	:	0	:	0	:	None	:	FALSE	:	FALSE	:	NonNegativeReals
	(12,	1)	:	0	:	4978.76	:	None	:	FALSE	:	FALSE	:	NonNegativeReals
	(12,	2)	:	0	:	0	:	None	:	FALSE	:	FALSE	:	NonNegativeReals
	(12,	3)	:	0	:	0	:	None	:	FALSE	:	FALSE	:	NonNegativeReals
	(12,	4)	:	0	:	0	:	None	:	FALSE	:	FALSE	:	NonNegativeReals
	(12,	5)	:	0	:	9594.77	:	None	:	FALSE	:	FALSE	:	NonNegativeReals
	(12,	6)	:	0	:	188.018	:	None	:	FALSE	:	FALSE	:	NonNegativeReals
	(12,	7)	:	0	:	7.16805	:	None	:	FALSE	:	FALSE	:	NonNegativeReals
	(12,	8)	:	0	:	0	:	None	:	FALSE	:	FALSE	:	NonNegativeReals
	(12,	9)	:	0	:	0	:	None	:	FALSE	:	FALSE	:	NonNegativeReals
	(12,	10)	:	0	:	2268.53	:	None	:	FALSE	:	FALSE	:	NonNegativeReals
	(12,	11)	:	0	:	0	:	None	:	FALSE	:	FALSE	:	NonNegativeReals
	(13,	1)	:	0	:	1294.83	:	None	:	FALSE	:	FALSE	:	NonNegativeReals
	(13,	2)	:	0	:	0	:	None	:	FALSE	:	FALSE	:	NonNegativeReals
	(13,	3)	:	0	:	0	:	None	:	FALSE	:	FALSE	:	NonNegativeReals
	(13,	4)	:	0	:	0	:	None	:	FALSE	:	FALSE	:	NonNegativeReals
	(13,	5)	:	0	:	0	:	None	:	FALSE	:	FALSE	:	NonNegativeReals
	(13,	6)	:	0	:	0	:	None	:	FALSE	:	FALSE	:	NonNegativeReals
	(13,	7)	:	0	:	0	:	None	:	FALSE	:	FALSE	:	NonNegativeReals
	(13,	8)	:	0	:	0	:	None	:	FALSE	:	FALSE	:	NonNegativeReals
	(13,	9)	:	0	:	0	:	None	:	FALSE	:	FALSE	:	NonNegativeReals
	(13,	10)	:	0	:	0	:	None	:	FALSE	:	FALSE	:	NonNegativeReals
	(13,	11)	:	0	:	0	:	None	:	FALSE	:	FALSE	:	NonNegativeReals
	Objectives:
	obj	:	Size=1,	Index=None,	Active=True
	Key	:	Active	:	GWP	profit
	None	:	TRUE	:	2.11145e+10	3.52803e+10
	Constraints:
	x_constraint	:	Size=13
	Key	:	Lower	:	Body	:	Upper
	1	:	0	:	0	:	0
	2	:	0	:	0	:	0
	3	:	0	:	0	:	0
	4	:	0	:	0	:	0
	5	:	0	:	0	:	0
	6	:	0	:	0	:	0
	7	:	0	:	0	:	0
	8	:	0	:	8.18545e-12	:	0
	9	:	0	:	0	:	0
	10	:	0	:	0	:	0
	11	:	0	:	0	:	0
	12	:	0	:	-3.63798e-12	:	0
	13	:	0	:	0	:	0
	y_constraint	:	Size=11
	Key	:	Lower	:	Body	:	Upper
	1	:	0	:	2.54659e-11	:	0
	2	:	0	:	0	:	0
	3	:	0	:	-3.9968e-15	:	0
	4	:	0	:	0	:	0
	5	:	0	:	-5.68434e-14	:	0
	6	:	0	:	5.68434e-14	:	0
	7	:	0	:	1.11022e-16	:	0
	8	:	0	:	0	:	0
	9	:	0	:	-1.35003e-13	:	0
	10	:	0	:	-6.25278e-13	:	0
	11	:	0	:	0	:	0
	y_demand_constraint	:	Size=11
	Key	:	Lower	:	Body	:	Upper	percentage	profit (USD/Kiloton)	tot profit
	1	:	None	:	12252.1	:	45995	0.266379	749049	9.17744e+09
	2	:	None	:	0	:	22.2	0	1.44633e+07	0
	3	:	None	:	3.22581	:	3.22581	1	7109070000	2.29325e+10
	4	:	None	:	0	:	150.572	0	844480000	0
	5	:	None	:	283	:	283	1	457500	1.29472e+08
	6	:	None	:	63	:	63	1	1457000	91791000
	7	:	None	:	0.382514	:	0.382514	1	7038170000	2.6922e+09
	8	:	None	:	0	:	1.50717	0	20340000	0
	9	:	None	:	62.272	:	62.272	1	410000	25531520
	10	:	None	:	482	:	482	1	480000	231360000
	11	:	None	:	0	:	40.625	0	6250000	0
	x_fleet_constraint	:	Size=13
	Key	:	Lower	:	Body	:	Upper
	1	:	None	:	23394.1	:	23394.1
	2	:	None	:	1984.65	:	1984.65
	3	:	None	:	5576.48	:	5576.48
	4	:	None	:	844.921	:	844.921
	5	:	None	:	8318.02	:	8318.02
	6	:	None	:	4269.35	:	4269.35
	7	:	None	:	211.473	:	211.473
	8	:	None	:	2076.61	:	2076.61
	9	:	None	:	11008.9	:	11008.9
	10	:	None	:	951.382	:	951.382
	11	:	None	:	2220.55	:	2220.55
	12	:	None	:	17037.2	:	17037.2
	13	:	None	:	1294.83	:	1294.83

## Sheet: US_LP_Env_eta120
Model	unknown
	Variables:
	x	:	Size=13,	Index=I
	Key	:	Lower	:	Value	:	Upper	:	Fixed	:	Stale	:	Domain
	1	:	0	:	19495	:	None	:	FALSE	:	FALSE	:	NonNegativeReals
	2	:	0	:	1653.88	:	None	:	FALSE	:	FALSE	:	NonNegativeReals
	3	:	0	:	4647.06	:	None	:	FALSE	:	FALSE	:	NonNegativeReals
	4	:	0	:	704.101	:	None	:	FALSE	:	FALSE	:	NonNegativeReals
	5	:	0	:	6931.68	:	None	:	FALSE	:	FALSE	:	NonNegativeReals
	6	:	0	:	3557.79	:	None	:	FALSE	:	FALSE	:	NonNegativeReals
	7	:	0	:	176.227	:	None	:	FALSE	:	FALSE	:	NonNegativeReals
	8	:	0	:	1730.51	:	None	:	FALSE	:	FALSE	:	NonNegativeReals
	9	:	0	:	9174.04	:	None	:	FALSE	:	FALSE	:	NonNegativeReals
	10	:	0	:	792.819	:	None	:	FALSE	:	FALSE	:	NonNegativeReals
	11	:	0	:	1850.46	:	None	:	FALSE	:	FALSE	:	NonNegativeReals
	12	:	0	:	14197.7	:	None	:	FALSE	:	FALSE	:	NonNegativeReals
	13	:	0	:	1079.03	:	None	:	FALSE	:	FALSE	:	NonNegativeReals
	y	:	Size=11,	Index=J
	Key	:	Lower	:	Value	:	Upper	:	Fixed	:	Stale	:	Domain
	1	:	0	:	12252.1	:	None	:	FALSE	:	FALSE	:	NonNegativeReals
	2	:	0	:	0	:	None	:	FALSE	:	FALSE	:	NonNegativeReals
	3	:	0	:	3.22581	:	None	:	FALSE	:	FALSE	:	NonNegativeReals
	4	:	0	:	0	:	None	:	FALSE	:	FALSE	:	NonNegativeReals
	5	:	0	:	283	:	None	:	FALSE	:	FALSE	:	NonNegativeReals
	6	:	0	:	63	:	None	:	FALSE	:	FALSE	:	NonNegativeReals
	7	:	0	:	0.382514	:	None	:	FALSE	:	FALSE	:	NonNegativeReals
	8	:	0	:	0	:	None	:	FALSE	:	FALSE	:	NonNegativeReals
	9	:	0	:	62.272	:	None	:	FALSE	:	FALSE	:	NonNegativeReals
	10	:	0	:	482	:	None	:	FALSE	:	FALSE	:	NonNegativeReals
	11	:	0	:	0	:	None	:	FALSE	:	FALSE	:	NonNegativeReals
	w	:	Size=143,	Index=I*J
	Key	:	Lower	:	Value	:	Upper	:	Fixed	:	Stale	:	Domain
	(1,	1)	:	0	:	19495	:	None	:	FALSE	:	FALSE	:	NonNegativeReals
	(1,	2)	:	0	:	0	:	None	:	FALSE	:	FALSE	:	NonNegativeReals
	(1,	3)	:	0	:	0	:	None	:	FALSE	:	FALSE	:	NonNegativeReals
	(1,	4)	:	0	:	0	:	None	:	FALSE	:	FALSE	:	NonNegativeReals
	(1,	5)	:	0	:	0	:	None	:	FALSE	:	FALSE	:	NonNegativeReals
	(1,	6)	:	0	:	0	:	None	:	FALSE	:	FALSE	:	NonNegativeReals
	(1,	7)	:	0	:	0	:	None	:	FALSE	:	FALSE	:	NonNegativeReals
	(1,	8)	:	0	:	0	:	None	:	FALSE	:	FALSE	:	NonNegativeReals
	(1,	9)	:	0	:	0	:	None	:	FALSE	:	FALSE	:	NonNegativeReals
	(1,	10)	:	0	:	0	:	None	:	FALSE	:	FALSE	:	NonNegativeReals
	(1,	11)	:	0	:	0	:	None	:	FALSE	:	FALSE	:	NonNegativeReals
	(2,	1)	:	0	:	1653.88	:	None	:	FALSE	:	FALSE	:	NonNegativeReals
	(2,	2)	:	0	:	0	:	None	:	FALSE	:	FALSE	:	NonNegativeReals
	(2,	3)	:	0	:	0	:	None	:	FALSE	:	FALSE	:	NonNegativeReals
	(2,	4)	:	0	:	0	:	None	:	FALSE	:	FALSE	:	NonNegativeReals
	(2,	5)	:	0	:	0	:	None	:	FALSE	:	FALSE	:	NonNegativeReals
	(2,	6)	:	0	:	0	:	None	:	FALSE	:	FALSE	:	NonNegativeReals
	(2,	7)	:	0	:	0	:	None	:	FALSE	:	FALSE	:	NonNegativeReals
	(2,	8)	:	0	:	0	:	None	:	FALSE	:	FALSE	:	NonNegativeReals
	(2,	9)	:	0	:	0	:	None	:	FALSE	:	FALSE	:	NonNegativeReals
	(2,	10)	:	0	:	0	:	None	:	FALSE	:	FALSE	:	NonNegativeReals
	(2,	11)	:	0	:	0	:	None	:	FALSE	:	FALSE	:	NonNegativeReals
	(3,	1)	:	0	:	4647.06	:	None	:	FALSE	:	FALSE	:	NonNegativeReals
	(3,	2)	:	0	:	0	:	None	:	FALSE	:	FALSE	:	NonNegativeReals
	(3,	3)	:	0	:	0	:	None	:	FALSE	:	FALSE	:	NonNegativeReals
	(3,	4)	:	0	:	0	:	None	:	FALSE	:	FALSE	:	NonNegativeReals
	(3,	5)	:	0	:	0	:	None	:	FALSE	:	FALSE	:	NonNegativeReals
	(3,	6)	:	0	:	0	:	None	:	FALSE	:	FALSE	:	NonNegativeReals
	(3,	7)	:	0	:	0	:	None	:	FALSE	:	FALSE	:	NonNegativeReals
	(3,	8)	:	0	:	0	:	None	:	FALSE	:	FALSE	:	NonNegativeReals
	(3,	9)	:	0	:	0	:	None	:	FALSE	:	FALSE	:	NonNegativeReals
	(3,	10)	:	0	:	0	:	None	:	FALSE	:	FALSE	:	NonNegativeReals
	(3,	11)	:	0	:	0	:	None	:	FALSE	:	FALSE	:	NonNegativeReals
	(4,	1)	:	0	:	704.101	:	None	:	FALSE	:	FALSE	:	NonNegativeReals
	(4,	2)	:	0	:	0	:	None	:	FALSE	:	FALSE	:	NonNegativeReals
	(4,	3)	:	0	:	0	:	None	:	FALSE	:	FALSE	:	NonNegativeReals
	(4,	4)	:	0	:	0	:	None	:	FALSE	:	FALSE	:	NonNegativeReals
	(4,	5)	:	0	:	0	:	None	:	FALSE	:	FALSE	:	NonNegativeReals
	(4,	6)	:	0	:	0	:	None	:	FALSE	:	FALSE	:	NonNegativeReals
	(4,	7)	:	0	:	0	:	None	:	FALSE	:	FALSE	:	NonNegativeReals
	(4,	8)	:	0	:	0	:	None	:	FALSE	:	FALSE	:	NonNegativeReals
	(4,	9)	:	0	:	0	:	None	:	FALSE	:	FALSE	:	NonNegativeReals
	(4,	10)	:	0	:	0	:	None	:	FALSE	:	FALSE	:	NonNegativeReals
	(4,	11)	:	0	:	0	:	None	:	FALSE	:	FALSE	:	NonNegativeReals
	(5,	1)	:	0	:	6931.68	:	None	:	FALSE	:	FALSE	:	NonNegativeReals
	(5,	2)	:	0	:	0	:	None	:	FALSE	:	FALSE	:	NonNegativeReals
	(5,	3)	:	0	:	0	:	None	:	FALSE	:	FALSE	:	NonNegativeReals
	(5,	4)	:	0	:	0	:	None	:	FALSE	:	FALSE	:	NonNegativeReals
	(5,	5)	:	0	:	0	:	None	:	FALSE	:	FALSE	:	NonNegativeReals
	(5,	6)	:	0	:	0	:	None	:	FALSE	:	FALSE	:	NonNegativeReals
	(5,	7)	:	0	:	0	:	None	:	FALSE	:	FALSE	:	NonNegativeReals
	(5,	8)	:	0	:	0	:	None	:	FALSE	:	FALSE	:	NonNegativeReals
	(5,	9)	:	0	:	0	:	None	:	FALSE	:	FALSE	:	NonNegativeReals
	(5,	10)	:	0	:	0	:	None	:	FALSE	:	FALSE	:	NonNegativeReals
	(5,	11)	:	0	:	0	:	None	:	FALSE	:	FALSE	:	NonNegativeReals
	(6,	1)	:	0	:	3557.79	:	None	:	FALSE	:	FALSE	:	NonNegativeReals
	(6,	2)	:	0	:	0	:	None	:	FALSE	:	FALSE	:	NonNegativeReals
	(6,	3)	:	0	:	0	:	None	:	FALSE	:	FALSE	:	NonNegativeReals
	(6,	4)	:	0	:	0	:	None	:	FALSE	:	FALSE	:	NonNegativeReals
	(6,	5)	:	0	:	0	:	None	:	FALSE	:	FALSE	:	NonNegativeReals
	(6,	6)	:	0	:	0	:	None	:	FALSE	:	FALSE	:	NonNegativeReals
	(6,	7)	:	0	:	0	:	None	:	FALSE	:	FALSE	:	NonNegativeReals
	(6,	8)	:	0	:	0	:	None	:	FALSE	:	FALSE	:	NonNegativeReals
	(6,	9)	:	0	:	0	:	None	:	FALSE	:	FALSE	:	NonNegativeReals
	(6,	10)	:	0	:	0	:	None	:	FALSE	:	FALSE	:	NonNegativeReals
	(6,	11)	:	0	:	0	:	None	:	FALSE	:	FALSE	:	NonNegativeReals
	(7,	1)	:	0	:	176.227	:	None	:	FALSE	:	FALSE	:	NonNegativeReals
	(7,	2)	:	0	:	0	:	None	:	FALSE	:	FALSE	:	NonNegativeReals
	(7,	3)	:	0	:	0	:	None	:	FALSE	:	FALSE	:	NonNegativeReals
	(7,	4)	:	0	:	0	:	None	:	FALSE	:	FALSE	:	NonNegativeReals
	(7,	5)	:	0	:	0	:	None	:	FALSE	:	FALSE	:	NonNegativeReals
	(7,	6)	:	0	:	0	:	None	:	FALSE	:	FALSE	:	NonNegativeReals
	(7,	7)	:	0	:	0	:	None	:	FALSE	:	FALSE	:	NonNegativeReals
	(7,	8)	:	0	:	0	:	None	:	FALSE	:	FALSE	:	NonNegativeReals
	(7,	9)	:	0	:	0	:	None	:	FALSE	:	FALSE	:	NonNegativeReals
	(7,	10)	:	0	:	0	:	None	:	FALSE	:	FALSE	:	NonNegativeReals
	(7,	11)	:	0	:	0	:	None	:	FALSE	:	FALSE	:	NonNegativeReals
	(8,	1)	:	0	:	1726.7	:	None	:	FALSE	:	FALSE	:	NonNegativeReals
	(8,	2)	:	0	:	0	:	None	:	FALSE	:	FALSE	:	NonNegativeReals
	(8,	3)	:	0	:	3.80222	:	None	:	FALSE	:	FALSE	:	NonNegativeReals
	(8,	4)	:	0	:	0	:	None	:	FALSE	:	FALSE	:	NonNegativeReals
	(8,	5)	:	0	:	0	:	None	:	FALSE	:	FALSE	:	NonNegativeReals
	(8,	6)	:	0	:	0	:	None	:	FALSE	:	FALSE	:	NonNegativeReals
	(8,	7)	:	0	:	0	:	None	:	FALSE	:	FALSE	:	NonNegativeReals
	(8,	8)	:	0	:	0	:	None	:	FALSE	:	FALSE	:	NonNegativeReals
	(8,	9)	:	0	:	0	:	None	:	FALSE	:	FALSE	:	NonNegativeReals
	(8,	10)	:	0	:	0	:	None	:	FALSE	:	FALSE	:	NonNegativeReals
	(8,	11)	:	0	:	0	:	None	:	FALSE	:	FALSE	:	NonNegativeReals
	(9,	1)	:	0	:	9174.04	:	None	:	FALSE	:	FALSE	:	NonNegativeReals
	(9,	2)	:	0	:	0	:	None	:	FALSE	:	FALSE	:	NonNegativeReals
	(9,	3)	:	0	:	0	:	None	:	FALSE	:	FALSE	:	NonNegativeReals
	(9,	4)	:	0	:	0	:	None	:	FALSE	:	FALSE	:	NonNegativeReals
	(9,	5)	:	0	:	0	:	None	:	FALSE	:	FALSE	:	NonNegativeReals
	(9,	6)	:	0	:	0	:	None	:	FALSE	:	FALSE	:	NonNegativeReals
	(9,	7)	:	0	:	0	:	None	:	FALSE	:	FALSE	:	NonNegativeReals
	(9,	8)	:	0	:	0	:	None	:	FALSE	:	FALSE	:	NonNegativeReals
	(9,	9)	:	0	:	0	:	None	:	FALSE	:	FALSE	:	NonNegativeReals
	(9,	10)	:	0	:	0	:	None	:	FALSE	:	FALSE	:	NonNegativeReals
	(9,	11)	:	0	:	0	:	None	:	FALSE	:	FALSE	:	NonNegativeReals
	(10,	1)	:	0	:	687.352	:	None	:	FALSE	:	FALSE	:	NonNegativeReals
	(10,	2)	:	0	:	0	:	None	:	FALSE	:	FALSE	:	NonNegativeReals
	(10,	3)	:	0	:	0	:	None	:	FALSE	:	FALSE	:	NonNegativeReals
	(10,	4)	:	0	:	0	:	None	:	FALSE	:	FALSE	:	NonNegativeReals
	(10,	5)	:	0	:	0	:	None	:	FALSE	:	FALSE	:	NonNegativeReals
	(10,	6)	:	0	:	0	:	None	:	FALSE	:	FALSE	:	NonNegativeReals
	(10,	7)	:	0	:	0	:	None	:	FALSE	:	FALSE	:	NonNegativeReals
	(10,	8)	:	0	:	0	:	None	:	FALSE	:	FALSE	:	NonNegativeReals
	(10,	9)	:	0	:	105.467	:	None	:	FALSE	:	FALSE	:	NonNegativeReals
	(10,	10)	:	0	:	0	:	None	:	FALSE	:	FALSE	:	NonNegativeReals
	(10,	11)	:	0	:	0	:	None	:	FALSE	:	FALSE	:	NonNegativeReals
	(11,	1)	:	0	:	1850.46	:	None	:	FALSE	:	FALSE	:	NonNegativeReals
	(11,	2)	:	0	:	0	:	None	:	FALSE	:	FALSE	:	NonNegativeReals
	(11,	3)	:	0	:	0	:	None	:	FALSE	:	FALSE	:	NonNegativeReals
	(11,	4)	:	0	:	0	:	None	:	FALSE	:	FALSE	:	NonNegativeReals
	(11,	5)	:	0	:	0	:	None	:	FALSE	:	FALSE	:	NonNegativeReals
	(11,	6)	:	0	:	0	:	None	:	FALSE	:	FALSE	:	NonNegativeReals
	(11,	7)	:	0	:	0	:	None	:	FALSE	:	FALSE	:	NonNegativeReals
	(11,	8)	:	0	:	0	:	None	:	FALSE	:	FALSE	:	NonNegativeReals
	(11,	9)	:	0	:	0	:	None	:	FALSE	:	FALSE	:	NonNegativeReals
	(11,	10)	:	0	:	0	:	None	:	FALSE	:	FALSE	:	NonNegativeReals
	(11,	11)	:	0	:	0	:	None	:	FALSE	:	FALSE	:	NonNegativeReals
	(12,	1)	:	0	:	4148.96	:	None	:	FALSE	:	FALSE	:	NonNegativeReals
	(12,	2)	:	0	:	0	:	None	:	FALSE	:	FALSE	:	NonNegativeReals
	(12,	3)	:	0	:	0	:	None	:	FALSE	:	FALSE	:	NonNegativeReals
	(12,	4)	:	0	:	0	:	None	:	FALSE	:	FALSE	:	NonNegativeReals
	(12,	5)	:	0	:	7995.64	:	None	:	FALSE	:	FALSE	:	NonNegativeReals
	(12,	6)	:	0	:	156.682	:	None	:	FALSE	:	FALSE	:	NonNegativeReals
	(12,	7)	:	0	:	5.97338	:	None	:	FALSE	:	FALSE	:	NonNegativeReals
	(12,	8)	:	0	:	0	:	None	:	FALSE	:	FALSE	:	NonNegativeReals
	(12,	9)	:	0	:	0	:	None	:	FALSE	:	FALSE	:	NonNegativeReals
	(12,	10)	:	0	:	1890.44	:	None	:	FALSE	:	FALSE	:	NonNegativeReals
	(12,	11)	:	0	:	0	:	None	:	FALSE	:	FALSE	:	NonNegativeReals
	(13,	1)	:	0	:	1079.03	:	None	:	FALSE	:	FALSE	:	NonNegativeReals
	(13,	2)	:	0	:	0	:	None	:	FALSE	:	FALSE	:	NonNegativeReals
	(13,	3)	:	0	:	0	:	None	:	FALSE	:	FALSE	:	NonNegativeReals
	(13,	4)	:	0	:	0	:	None	:	FALSE	:	FALSE	:	NonNegativeReals
	(13,	5)	:	0	:	0	:	None	:	FALSE	:	FALSE	:	NonNegativeReals
	(13,	6)	:	0	:	0	:	None	:	FALSE	:	FALSE	:	NonNegativeReals
	(13,	7)	:	0	:	0	:	None	:	FALSE	:	FALSE	:	NonNegativeReals
	(13,	8)	:	0	:	0	:	None	:	FALSE	:	FALSE	:	NonNegativeReals
	(13,	9)	:	0	:	0	:	None	:	FALSE	:	FALSE	:	NonNegativeReals
	(13,	10)	:	0	:	0	:	None	:	FALSE	:	FALSE	:	NonNegativeReals
	(13,	11)	:	0	:	0	:	None	:	FALSE	:	FALSE	:	NonNegativeReals
	Objectives:
	obj	:	Size=1,	Index=None,	Active=True
	Key	:	Active	:	Value	profit
	None	:	TRUE	:	2.11145e+10	3.52803e+10
	Constraints:
	x_constraint	:	Size=13
	Key	:	Lower	:	Body	:	Upper
	1	:	0	:	0	:	0
	2	:	0	:	0	:	0
	3	:	0	:	0	:	0
	4	:	0	:	0	:	0
	5	:	0	:	0	:	0
	6	:	0	:	0	:	0
	7	:	0	:	0	:	0
	8	:	0	:	3.63798e-12	:	0
	9	:	0	:	0	:	0
	10	:	0	:	-1.13687e-13	:	0
	11	:	0	:	0	:	0
	12	:	0	:	-1.81899e-12	:	0
	13	:	0	:	0	:	0
	y_constraint	:	Size=11
	Key	:	Lower	:	Body	:	Upper
	1	:	0	:	2.00089e-11	:	0
	2	:	0	:	0	:	0
	3	:	0	:	-1.33227e-15	:	0
	4	:	0	:	0	:	0
	5	:	0	:	1.13687e-13	:	0
	6	:	0	:	-1.42109e-13	:	0
	7	:	0	:	1.66533e-16	:	0
	8	:	0	:	0	:	0
	9	:	0	:	-3.55271e-14	:	0
	10	:	0	:	-1.7053e-13	:	0
	11	:	0	:	0	:	0
	y_demand_constraint	:	Size=11
	Key	:	Lower	:	Body	:	Upper	percentage	profit (USD/Kiloton)	tot profit
	1	:	None	:	12252.1	:	45995	0.266379	749049	9.17744e+09
	2	:	None	:	0	:	22.2	0	1.44633e+07	0
	3	:	None	:	3.22581	:	3.22581	1	7109070000	2.29325e+10
	4	:	None	:	0	:	150.572	0	844480000	0
	5	:	None	:	283	:	283	1	457500	1.29472e+08
	6	:	None	:	63	:	63	1	1457000	91791000
	7	:	None	:	0.382514	:	0.382514	1	7038170000	2.6922e+09
	8	:	None	:	0	:	1.50717	0	20340000	0
	9	:	None	:	62.272	:	62.272	1	410000	25531520
	10	:	None	:	482	:	482	1	480000	231360000
	11	:	None	:	0	:	40.625	0	6250000	0
	x_fleet_constraint	:	Size=13
	Key	:	Lower	:	Body	:	Upper
	1	:	None	:	19495	:	19495
	2	:	None	:	1653.88	:	1653.88
	3	:	None	:	4647.06	:	4647.06
	4	:	None	:	704.101	:	704.101
	5	:	None	:	6931.68	:	6931.68
	6	:	None	:	3557.79	:	3557.79
	7	:	None	:	176.227	:	176.227
	8	:	None	:	1730.51	:	1730.51
	9	:	None	:	9174.04	:	9174.04
	10	:	None	:	792.819	:	792.819
	11	:	None	:	1850.46	:	1850.46
	12	:	None	:	14197.7	:	14197.7
	13	:	None	:	1079.03	:	1079.03

## Sheet: US_LP_Env_eta80
Model	unknown
	Variables:
	x	:	Size=13,	Index=I
	Key	:	Lower	:	Value	:	Upper	:	Fixed	:	Stale	:	Domain
	1	:	0	:	19495	:	None	:	FALSE	:	FALSE	:	NonNegativeReals
	2	:	0	:	1653.88	:	None	:	FALSE	:	FALSE	:	NonNegativeReals
	3	:	0	:	4647.06	:	None	:	FALSE	:	FALSE	:	NonNegativeReals
	4	:	0	:	704.101	:	None	:	FALSE	:	FALSE	:	NonNegativeReals
	5	:	0	:	6931.68	:	None	:	FALSE	:	FALSE	:	NonNegativeReals
	6	:	0	:	3557.79	:	None	:	FALSE	:	FALSE	:	NonNegativeReals
	7	:	0	:	176.227	:	None	:	FALSE	:	FALSE	:	NonNegativeReals
	8	:	0	:	1730.51	:	None	:	FALSE	:	FALSE	:	NonNegativeReals
	9	:	0	:	9174.04	:	None	:	FALSE	:	FALSE	:	NonNegativeReals
	10	:	0	:	792.819	:	None	:	FALSE	:	FALSE	:	NonNegativeReals
	11	:	0	:	1850.46	:	None	:	FALSE	:	FALSE	:	NonNegativeReals
	12	:	0	:	14197.7	:	None	:	FALSE	:	FALSE	:	NonNegativeReals
	13	:	0	:	1079.03	:	None	:	FALSE	:	FALSE	:	NonNegativeReals
	y	:	Size=11,	Index=J
	Key	:	Lower	:	Value	:	Upper	:	Fixed	:	Stale	:	Domain
	1	:	0	:	7926.23	:	None	:	FALSE	:	FALSE	:	NonNegativeReals
	2	:	0	:	0	:	None	:	FALSE	:	FALSE	:	NonNegativeReals
	3	:	0	:	3.22581	:	None	:	FALSE	:	FALSE	:	NonNegativeReals
	4	:	0	:	0	:	None	:	FALSE	:	FALSE	:	NonNegativeReals
	5	:	0	:	283	:	None	:	FALSE	:	FALSE	:	NonNegativeReals
	6	:	0	:	63	:	None	:	FALSE	:	FALSE	:	NonNegativeReals
	7	:	0	:	0	:	None	:	FALSE	:	FALSE	:	NonNegativeReals
	8	:	0	:	0	:	None	:	FALSE	:	FALSE	:	NonNegativeReals
	9	:	0	:	62.272	:	None	:	FALSE	:	FALSE	:	NonNegativeReals
	10	:	0	:	482	:	None	:	FALSE	:	FALSE	:	NonNegativeReals
	11	:	0	:	0	:	None	:	FALSE	:	FALSE	:	NonNegativeReals
	w	:	Size=143,	Index=I*J
	Key	:	Lower	:	Value	:	Upper	:	Fixed	:	Stale	:	Domain
	(1,	1)	:	0	:	19495	:	None	:	FALSE	:	FALSE	:	NonNegativeReals
	(1,	2)	:	0	:	0	:	None	:	FALSE	:	FALSE	:	NonNegativeReals
	(1,	3)	:	0	:	0	:	None	:	FALSE	:	FALSE	:	NonNegativeReals
	(1,	4)	:	0	:	0	:	None	:	FALSE	:	FALSE	:	NonNegativeReals
	(1,	5)	:	0	:	0	:	None	:	FALSE	:	FALSE	:	NonNegativeReals
	(1,	6)	:	0	:	0	:	None	:	FALSE	:	FALSE	:	NonNegativeReals
	(1,	7)	:	0	:	0	:	None	:	FALSE	:	FALSE	:	NonNegativeReals
	(1,	8)	:	0	:	0	:	None	:	FALSE	:	FALSE	:	NonNegativeReals
	(1,	9)	:	0	:	0	:	None	:	FALSE	:	FALSE	:	NonNegativeReals
	(1,	10)	:	0	:	0	:	None	:	FALSE	:	FALSE	:	NonNegativeReals
	(1,	11)	:	0	:	0	:	None	:	FALSE	:	FALSE	:	NonNegativeReals
	(2,	1)	:	0	:	1653.88	:	None	:	FALSE	:	FALSE	:	NonNegativeReals
	(2,	2)	:	0	:	0	:	None	:	FALSE	:	FALSE	:	NonNegativeReals
	(2,	3)	:	0	:	0	:	None	:	FALSE	:	FALSE	:	NonNegativeReals
	(2,	4)	:	0	:	0	:	None	:	FALSE	:	FALSE	:	NonNegativeReals
	(2,	5)	:	0	:	0	:	None	:	FALSE	:	FALSE	:	NonNegativeReals
	(2,	6)	:	0	:	0	:	None	:	FALSE	:	FALSE	:	NonNegativeReals
	(2,	7)	:	0	:	0	:	None	:	FALSE	:	FALSE	:	NonNegativeReals
	(2,	8)	:	0	:	0	:	None	:	FALSE	:	FALSE	:	NonNegativeReals
	(2,	9)	:	0	:	0	:	None	:	FALSE	:	FALSE	:	NonNegativeReals
	(2,	10)	:	0	:	0	:	None	:	FALSE	:	FALSE	:	NonNegativeReals
	(2,	11)	:	0	:	0	:	None	:	FALSE	:	FALSE	:	NonNegativeReals
	(3,	1)	:	0	:	4647.06	:	None	:	FALSE	:	FALSE	:	NonNegativeReals
	(3,	2)	:	0	:	0	:	None	:	FALSE	:	FALSE	:	NonNegativeReals
	(3,	3)	:	0	:	0	:	None	:	FALSE	:	FALSE	:	NonNegativeReals
	(3,	4)	:	0	:	0	:	None	:	FALSE	:	FALSE	:	NonNegativeReals
	(3,	5)	:	0	:	0	:	None	:	FALSE	:	FALSE	:	NonNegativeReals
	(3,	6)	:	0	:	0	:	None	:	FALSE	:	FALSE	:	NonNegativeReals
	(3,	7)	:	0	:	0	:	None	:	FALSE	:	FALSE	:	NonNegativeReals
	(3,	8)	:	0	:	0	:	None	:	FALSE	:	FALSE	:	NonNegativeReals
	(3,	9)	:	0	:	0	:	None	:	FALSE	:	FALSE	:	NonNegativeReals
	(3,	10)	:	0	:	0	:	None	:	FALSE	:	FALSE	:	NonNegativeReals
	(3,	11)	:	0	:	0	:	None	:	FALSE	:	FALSE	:	NonNegativeReals
	(4,	1)	:	0	:	179.925	:	None	:	FALSE	:	FALSE	:	NonNegativeReals
	(4,	2)	:	0	:	0	:	None	:	FALSE	:	FALSE	:	NonNegativeReals
	(4,	3)	:	0	:	0	:	None	:	FALSE	:	FALSE	:	NonNegativeReals
	(4,	4)	:	0	:	0	:	None	:	FALSE	:	FALSE	:	NonNegativeReals
	(4,	5)	:	0	:	524.175	:	None	:	FALSE	:	FALSE	:	NonNegativeReals
	(4,	6)	:	0	:	0	:	None	:	FALSE	:	FALSE	:	NonNegativeReals
	(4,	7)	:	0	:	0	:	None	:	FALSE	:	FALSE	:	NonNegativeReals
	(4,	8)	:	0	:	0	:	None	:	FALSE	:	FALSE	:	NonNegativeReals
	(4,	9)	:	0	:	0	:	None	:	FALSE	:	FALSE	:	NonNegativeReals
	(4,	10)	:	0	:	0	:	None	:	FALSE	:	FALSE	:	NonNegativeReals
	(4,	11)	:	0	:	0	:	None	:	FALSE	:	FALSE	:	NonNegativeReals
	(5,	1)	:	0	:	6931.68	:	None	:	FALSE	:	FALSE	:	NonNegativeReals
	(5,	2)	:	0	:	0	:	None	:	FALSE	:	FALSE	:	NonNegativeReals
	(5,	3)	:	0	:	0	:	None	:	FALSE	:	FALSE	:	NonNegativeReals
	(5,	4)	:	0	:	0	:	None	:	FALSE	:	FALSE	:	NonNegativeReals
	(5,	5)	:	0	:	0	:	None	:	FALSE	:	FALSE	:	NonNegativeReals
	(5,	6)	:	0	:	0	:	None	:	FALSE	:	FALSE	:	NonNegativeReals
	(5,	7)	:	0	:	0	:	None	:	FALSE	:	FALSE	:	NonNegativeReals
	(5,	8)	:	0	:	0	:	None	:	FALSE	:	FALSE	:	NonNegativeReals
	(5,	9)	:	0	:	0	:	None	:	FALSE	:	FALSE	:	NonNegativeReals
	(5,	10)	:	0	:	0	:	None	:	FALSE	:	FALSE	:	NonNegativeReals
	(5,	11)	:	0	:	0	:	None	:	FALSE	:	FALSE	:	NonNegativeReals
	(6,	1)	:	0	:	3557.79	:	None	:	FALSE	:	FALSE	:	NonNegativeReals
	(6,	2)	:	0	:	0	:	None	:	FALSE	:	FALSE	:	NonNegativeReals
	(6,	3)	:	0	:	0	:	None	:	FALSE	:	FALSE	:	NonNegativeReals
	(6,	4)	:	0	:	0	:	None	:	FALSE	:	FALSE	:	NonNegativeReals
	(6,	5)	:	0	:	0	:	None	:	FALSE	:	FALSE	:	NonNegativeReals
	(6,	6)	:	0	:	0	:	None	:	FALSE	:	FALSE	:	NonNegativeReals
	(6,	7)	:	0	:	0	:	None	:	FALSE	:	FALSE	:	NonNegativeReals
	(6,	8)	:	0	:	0	:	None	:	FALSE	:	FALSE	:	NonNegativeReals
	(6,	9)	:	0	:	0	:	None	:	FALSE	:	FALSE	:	NonNegativeReals
	(6,	10)	:	0	:	0	:	None	:	FALSE	:	FALSE	:	NonNegativeReals
	(6,	11)	:	0	:	0	:	None	:	FALSE	:	FALSE	:	NonNegativeReals
	(7,	1)	:	0	:	176.227	:	None	:	FALSE	:	FALSE	:	NonNegativeReals
	(7,	2)	:	0	:	0	:	None	:	FALSE	:	FALSE	:	NonNegativeReals
	(7,	3)	:	0	:	0	:	None	:	FALSE	:	FALSE	:	NonNegativeReals
	(7,	4)	:	0	:	0	:	None	:	FALSE	:	FALSE	:	NonNegativeReals
	(7,	5)	:	0	:	0	:	None	:	FALSE	:	FALSE	:	NonNegativeReals
	(7,	6)	:	0	:	0	:	None	:	FALSE	:	FALSE	:	NonNegativeReals
	(7,	7)	:	0	:	0	:	None	:	FALSE	:	FALSE	:	NonNegativeReals
	(7,	8)	:	0	:	0	:	None	:	FALSE	:	FALSE	:	NonNegativeReals
	(7,	9)	:	0	:	0	:	None	:	FALSE	:	FALSE	:	NonNegativeReals
	(7,	10)	:	0	:	0	:	None	:	FALSE	:	FALSE	:	NonNegativeReals
	(7,	11)	:	0	:	0	:	None	:	FALSE	:	FALSE	:	NonNegativeReals
	(8,	1)	:	0	:	1724.8	:	None	:	FALSE	:	FALSE	:	NonNegativeReals
	(8,	2)	:	0	:	0	:	None	:	FALSE	:	FALSE	:	NonNegativeReals
	(8,	3)	:	0	:	5.70334	:	None	:	FALSE	:	FALSE	:	NonNegativeReals
	(8,	4)	:	0	:	0	:	None	:	FALSE	:	FALSE	:	NonNegativeReals
	(8,	5)	:	0	:	0	:	None	:	FALSE	:	FALSE	:	NonNegativeReals
	(8,	6)	:	0	:	0	:	None	:	FALSE	:	FALSE	:	NonNegativeReals
	(8,	7)	:	0	:	0	:	None	:	FALSE	:	FALSE	:	NonNegativeReals
	(8,	8)	:	0	:	0	:	None	:	FALSE	:	FALSE	:	NonNegativeReals
	(8,	9)	:	0	:	0	:	None	:	FALSE	:	FALSE	:	NonNegativeReals
	(8,	10)	:	0	:	0	:	None	:	FALSE	:	FALSE	:	NonNegativeReals
	(8,	11)	:	0	:	0	:	None	:	FALSE	:	FALSE	:	NonNegativeReals
	(9,	1)	:	0	:	9174.04	:	None	:	FALSE	:	FALSE	:	NonNegativeReals
	(9,	2)	:	0	:	0	:	None	:	FALSE	:	FALSE	:	NonNegativeReals
	(9,	3)	:	0	:	0	:	None	:	FALSE	:	FALSE	:	NonNegativeReals
	(9,	4)	:	0	:	0	:	None	:	FALSE	:	FALSE	:	NonNegativeReals
	(9,	5)	:	0	:	0	:	None	:	FALSE	:	FALSE	:	NonNegativeReals
	(9,	6)	:	0	:	0	:	None	:	FALSE	:	FALSE	:	NonNegativeReals
	(9,	7)	:	0	:	0	:	None	:	FALSE	:	FALSE	:	NonNegativeReals
	(9,	8)	:	0	:	0	:	None	:	FALSE	:	FALSE	:	NonNegativeReals
	(9,	9)	:	0	:	0	:	None	:	FALSE	:	FALSE	:	NonNegativeReals
	(9,	10)	:	0	:	0	:	None	:	FALSE	:	FALSE	:	NonNegativeReals
	(9,	11)	:	0	:	0	:	None	:	FALSE	:	FALSE	:	NonNegativeReals
	(10,	1)	:	0	:	443.81	:	None	:	FALSE	:	FALSE	:	NonNegativeReals
	(10,	2)	:	0	:	0	:	None	:	FALSE	:	FALSE	:	NonNegativeReals
	(10,	3)	:	0	:	0	:	None	:	FALSE	:	FALSE	:	NonNegativeReals
	(10,	4)	:	0	:	0	:	None	:	FALSE	:	FALSE	:	NonNegativeReals
	(10,	5)	:	0	:	0	:	None	:	FALSE	:	FALSE	:	NonNegativeReals
	(10,	6)	:	0	:	190.808	:	None	:	FALSE	:	FALSE	:	NonNegativeReals
	(10,	7)	:	0	:	0	:	None	:	FALSE	:	FALSE	:	NonNegativeReals
	(10,	8)	:	0	:	0	:	None	:	FALSE	:	FALSE	:	NonNegativeReals
	(10,	9)	:	0	:	158.2	:	None	:	FALSE	:	FALSE	:	NonNegativeReals
	(10,	10)	:	0	:	0	:	None	:	FALSE	:	FALSE	:	NonNegativeReals
	(10,	11)	:	0	:	0	:	None	:	FALSE	:	FALSE	:	NonNegativeReals
	(11,	1)	:	0	:	1850.46	:	None	:	FALSE	:	FALSE	:	NonNegativeReals
	(11,	2)	:	0	:	0	:	None	:	FALSE	:	FALSE	:	NonNegativeReals
	(11,	3)	:	0	:	0	:	None	:	FALSE	:	FALSE	:	NonNegativeReals
	(11,	4)	:	0	:	0	:	None	:	FALSE	:	FALSE	:	NonNegativeReals
	(11,	5)	:	0	:	0	:	None	:	FALSE	:	FALSE	:	NonNegativeReals
	(11,	6)	:	0	:	0	:	None	:	FALSE	:	FALSE	:	NonNegativeReals
	(11,	7)	:	0	:	0	:	None	:	FALSE	:	FALSE	:	NonNegativeReals
	(11,	8)	:	0	:	0	:	None	:	FALSE	:	FALSE	:	NonNegativeReals
	(11,	9)	:	0	:	0	:	None	:	FALSE	:	FALSE	:	NonNegativeReals
	(11,	10)	:	0	:	0	:	None	:	FALSE	:	FALSE	:	NonNegativeReals
	(11,	11)	:	0	:	0	:	None	:	FALSE	:	FALSE	:	NonNegativeReals
	(12,	1)	:	0	:	0	:	None	:	FALSE	:	FALSE	:	NonNegativeReals
	(12,	2)	:	0	:	0	:	None	:	FALSE	:	FALSE	:	NonNegativeReals
	(12,	3)	:	0	:	0	:	None	:	FALSE	:	FALSE	:	NonNegativeReals
	(12,	4)	:	0	:	0	:	None	:	FALSE	:	FALSE	:	NonNegativeReals
	(12,	5)	:	0	:	11362	:	None	:	FALSE	:	FALSE	:	NonNegativeReals
	(12,	6)	:	0	:	0	:	None	:	FALSE	:	FALSE	:	NonNegativeReals
	(12,	7)	:	0	:	0	:	None	:	FALSE	:	FALSE	:	NonNegativeReals
	(12,	8)	:	0	:	0	:	None	:	FALSE	:	FALSE	:	NonNegativeReals
	(12,	9)	:	0	:	0	:	None	:	FALSE	:	FALSE	:	NonNegativeReals
	(12,	10)	:	0	:	2835.66	:	None	:	FALSE	:	FALSE	:	NonNegativeReals
	(12,	11)	:	0	:	0	:	None	:	FALSE	:	FALSE	:	NonNegativeReals
	(13,	1)	:	0	:	1079.03	:	None	:	FALSE	:	FALSE	:	NonNegativeReals
	(13,	2)	:	0	:	0	:	None	:	FALSE	:	FALSE	:	NonNegativeReals
	(13,	3)	:	0	:	0	:	None	:	FALSE	:	FALSE	:	NonNegativeReals
	(13,	4)	:	0	:	0	:	None	:	FALSE	:	FALSE	:	NonNegativeReals
	(13,	5)	:	0	:	0	:	None	:	FALSE	:	FALSE	:	NonNegativeReals
	(13,	6)	:	0	:	0	:	None	:	FALSE	:	FALSE	:	NonNegativeReals
	(13,	7)	:	0	:	0	:	None	:	FALSE	:	FALSE	:	NonNegativeReals
	(13,	8)	:	0	:	0	:	None	:	FALSE	:	FALSE	:	NonNegativeReals
	(13,	9)	:	0	:	0	:	None	:	FALSE	:	FALSE	:	NonNegativeReals
	(13,	10)	:	0	:	0	:	None	:	FALSE	:	FALSE	:	NonNegativeReals
	(13,	11)	:	0	:	0	:	None	:	FALSE	:	FALSE	:	NonNegativeReals
	Objectives:
	obj	:	Size=1,	Index=None,	Active=True
	Key	:	Active	:	GWP	profit
	None	:	TRUE	:	1.49587e+10	2.93478e+10
	Constraints:
	x_constraint	:	Size=13
	Key	:	Lower	:	Body	:	Upper
	1	:	0	:	0	:	0
	2	:	0	:	0	:	0
	3	:	0	:	0	:	0
	4	:	0	:	-1.02318e-12	:	0
	5	:	0	:	0	:	0
	6	:	0	:	0	:	0
	7	:	0	:	0	:	0
	8	:	0	:	4.54747e-13	:	0
	9	:	0	:	0	:	0
	10	:	0	:	9.09495e-13	:	0
	11	:	0	:	0	:	0
	12	:	0	:	2.18279e-11	:	0
	13	:	0	:	0	:	0
	y_constraint	:	Size=11
	Key	:	Lower	:	Body	:	Upper
	1	:	0	:	-1.18234e-11	:	0
	2	:	0	:	0	:	0
	3	:	0	:	-1.33227e-15	:	0
	4	:	0	:	0	:	0
	5	:	0	:	4.54747e-13	:	0
	6	:	0	:	2.84217e-14	:	0
	7	:	0	:	0	:	0
	8	:	0	:	0	:	0
	9	:	0	:	1.56319e-13	:	0
	10	:	0	:	5.68434e-13	:	0
	11	:	0	:	0	:	0
	y_demand_constraint	:	Size=11
	Key	:	Lower	:	Body	:	Upper	percentage	profit (USD/Kiloton)	tot profit
	1	:	None	:	7926.23	:	45995	0.172328	749049	5.93714e+09
	2	:	None	:	0	:	22.2	0	1.44633e+07	0
	3	:	None	:	3.22581	:	3.22581	1	7109070000	2.29325e+10
	4	:	None	:	0	:	150.572	0	844480000	0
	5	:	None	:	283	:	283	1	457500	1.29472e+08
	6	:	None	:	63	:	63	1	1457000	91791000
	7	:	None	:	0	:	0.382514	0	7038170000	0
	8	:	None	:	0	:	1.50717	0	20340000	0
	9	:	None	:	62.272	:	62.272	1	410000	25531520
	10	:	None	:	482	:	482	1	480000	231360000
	11	:	None	:	0	:	40.625	0	6250000	0
	x_fleet_constraint	:	Size=13
	Key	:	Lower	:	Body	:	Upper	percentage
	1	:	None	:	19495	:	19495	1
	2	:	None	:	1653.88	:	1653.88	1
	3	:	None	:	4647.06	:	4647.06	1
	4	:	None	:	704.101	:	704.101	1
	5	:	None	:	6931.68	:	6931.68	1
	6	:	None	:	3557.79	:	3557.79	1
	7	:	None	:	176.227	:	176.227	1
	8	:	None	:	1730.51	:	1730.51	1
	9	:	None	:	9174.04	:	9174.04	1
	10	:	None	:	792.819	:	792.819	1
	11	:	None	:	1850.46	:	1850.46	1
	12	:	None	:	14197.7	:	14197.7	1
	13	:	None	:	1079.03	:	1079.03	1

## Sheet: CN_LP_Env
Model	unknown
	Variables:
	x	:	Size=22,	Index=I
	Key	:	Lower	:	Value	:	Upper	:	Fixed	:	Stale	:	Domain
	1	:	0	:	7125.63	:	None	:	False	:	False	:	NonNegativeReals
	2	:	0	:	0	:	None	:	False	:	False	:	NonNegativeReals
	3	:	0	:	0	:	None	:	False	:	False	:	NonNegativeReals
	4	:	0	:	0	:	None	:	False	:	False	:	NonNegativeReals
	5	:	0	:	7749.54	:	None	:	False	:	False	:	NonNegativeReals
	6	:	0	:	0	:	None	:	False	:	False	:	NonNegativeReals
	7	:	0	:	5.42237	:	None	:	False	:	False	:	NonNegativeReals
	8	:	0	:	4.56267	:	None	:	False	:	False	:	NonNegativeReals
	9	:	0	:	495.635	:	None	:	False	:	False	:	NonNegativeReals
	10	:	0	:	0	:	None	:	False	:	False	:	NonNegativeReals
	11	:	0	:	1113.66	:	None	:	False	:	False	:	NonNegativeReals
	12	:	0	:	385.5	:	None	:	False	:	False	:	NonNegativeReals
	13	:	0	:	0	:	None	:	False	:	False	:	NonNegativeReals
	14	:	0	:	0	:	None	:	False	:	False	:	NonNegativeReals
	15	:	0	:	9236.69	:	None	:	False	:	False	:	NonNegativeReals
	16	:	0	:	0	:	None	:	False	:	False	:	NonNegativeReals
	17	:	0	:	3808.23	:	None	:	False	:	False	:	NonNegativeReals
	18	:	0	:	947.105	:	None	:	False	:	False	:	NonNegativeReals
	19	:	0	:	0	:	None	:	False	:	False	:	NonNegativeReals
	20	:	0	:	0	:	None	:	False	:	False	:	NonNegativeReals
	21	:	0	:	0	:	None	:	False	:	False	:	NonNegativeReals
	22	:	0	:	0	:	None	:	False	:	False	:	NonNegativeReals
	y	:	Size=11,	Index=J
	Key	:	Lower	:	Value	:	Upper	:	Fixed	:	Stale	:	Domain
	1	:	0	:	2747.75	:	None	:	False	:	False	:	NonNegativeReals
	2	:	0	:	0	:	None	:	False	:	False	:	NonNegativeReals
	3	:	0	:	3.22581	:	None	:	False	:	False	:	NonNegativeReals
	4	:	0	:	0	:	None	:	False	:	False	:	NonNegativeReals
	5	:	0	:	466.214	:	None	:	False	:	False	:	NonNegativeReals
	6	:	0	:	139.09	:	None	:	False	:	False	:	NonNegativeReals
	7	:	0	:	0.26802	:	None	:	False	:	False	:	NonNegativeReals
	8	:	0	:	0	:	None	:	False	:	False	:	NonNegativeReals
	9	:	0	:	253.953	:	None	:	False	:	False	:	NonNegativeReals
	10	:	0	:	866	:	None	:	False	:	False	:	NonNegativeReals
	11	:	0	:	33.25	:	None	:	False	:	False	:	NonNegativeReals
	w	:	Size=242,	Index=I*J
	Key	:	Lower	:	Value	:	Upper	:	Fixed	:	Stale	:	Domain
	(1,	1)	:	0	:	4664.6	:	None	:	False	:	False	:	NonNegativeReals
	(1,	2)	:	0	:	0	:	None	:	False	:	False	:	NonNegativeReals
	(1,	3)	:	0	:	0	:	None	:	False	:	False	:	NonNegativeReals
	(1,	4)	:	0	:	0	:	None	:	False	:	False	:	NonNegativeReals
	(1,	5)	:	0	:	0	:	None	:	False	:	False	:	NonNegativeReals
	(1,	6)	:	0	:	0	:	None	:	False	:	False	:	NonNegativeReals
	(1,	7)	:	0	:	0	:	None	:	False	:	False	:	NonNegativeReals
	(1,	8)	:	0	:	0	:	None	:	False	:	False	:	NonNegativeReals
	(1,	9)	:	0	:	394.257	:	None	:	False	:	False	:	NonNegativeReals
	(1,	10)	:	0	:	2066.78	:	None	:	False	:	False	:	NonNegativeReals
	(1,	11)	:	0	:	0	:	None	:	False	:	False	:	NonNegativeReals
	(2,	1)	:	0	:	0	:	None	:	False	:	False	:	NonNegativeReals
	(2,	2)	:	0	:	0	:	None	:	False	:	False	:	NonNegativeReals
	(2,	3)	:	0	:	0	:	None	:	False	:	False	:	NonNegativeReals
	(2,	4)	:	0	:	0	:	None	:	False	:	False	:	NonNegativeReals
	(2,	5)	:	0	:	0	:	None	:	False	:	False	:	NonNegativeReals
	(2,	6)	:	0	:	0	:	None	:	False	:	False	:	NonNegativeReals
	(2,	7)	:	0	:	0	:	None	:	False	:	False	:	NonNegativeReals
	(2,	8)	:	0	:	0	:	None	:	False	:	False	:	NonNegativeReals
	(2,	9)	:	0	:	0	:	None	:	False	:	False	:	NonNegativeReals
	(2,	10)	:	0	:	0	:	None	:	False	:	False	:	NonNegativeReals
	(2,	11)	:	0	:	0	:	None	:	False	:	False	:	NonNegativeReals
	(3,	1)	:	0	:	0	:	None	:	False	:	False	:	NonNegativeReals
	(3,	2)	:	0	:	0	:	None	:	False	:	False	:	NonNegativeReals
	(3,	3)	:	0	:	0	:	None	:	False	:	False	:	NonNegativeReals
	(3,	4)	:	0	:	0	:	None	:	False	:	False	:	NonNegativeReals
	(3,	5)	:	0	:	0	:	None	:	False	:	False	:	NonNegativeReals
	(3,	6)	:	0	:	0	:	None	:	False	:	False	:	NonNegativeReals
	(3,	7)	:	0	:	0	:	None	:	False	:	False	:	NonNegativeReals
	(3,	8)	:	0	:	0	:	None	:	False	:	False	:	NonNegativeReals
	(3,	9)	:	0	:	0	:	None	:	False	:	False	:	NonNegativeReals
	(3,	10)	:	0	:	0	:	None	:	False	:	False	:	NonNegativeReals
	(3,	11)	:	0	:	0	:	None	:	False	:	False	:	NonNegativeReals
	(4,	1)	:	0	:	0	:	None	:	False	:	False	:	NonNegativeReals
	(4,	2)	:	0	:	0	:	None	:	False	:	False	:	NonNegativeReals
	(4,	3)	:	0	:	0	:	None	:	False	:	False	:	NonNegativeReals
	(4,	4)	:	0	:	0	:	None	:	False	:	False	:	NonNegativeReals
	(4,	5)	:	0	:	0	:	None	:	False	:	False	:	NonNegativeReals
	(4,	6)	:	0	:	0	:	None	:	False	:	False	:	NonNegativeReals
	(4,	7)	:	0	:	0	:	None	:	False	:	False	:	NonNegativeReals
	(4,	8)	:	0	:	0	:	None	:	False	:	False	:	NonNegativeReals
	(4,	9)	:	0	:	0	:	None	:	False	:	False	:	NonNegativeReals
	(4,	10)	:	0	:	0	:	None	:	False	:	False	:	NonNegativeReals
	(4,	11)	:	0	:	0	:	None	:	False	:	False	:	NonNegativeReals
	(5,	1)	:	0	:	0	:	None	:	False	:	False	:	NonNegativeReals
	(5,	2)	:	0	:	0	:	None	:	False	:	False	:	NonNegativeReals
	(5,	3)	:	0	:	0	:	None	:	False	:	False	:	NonNegativeReals
	(5,	4)	:	0	:	0	:	None	:	False	:	False	:	NonNegativeReals
	(5,	5)	:	0	:	7749.54	:	None	:	False	:	False	:	NonNegativeReals
	(5,	6)	:	0	:	0	:	None	:	False	:	False	:	NonNegativeReals
	(5,	7)	:	0	:	0	:	None	:	False	:	False	:	NonNegativeReals
	(5,	8)	:	0	:	0	:	None	:	False	:	False	:	NonNegativeReals
	(5,	9)	:	0	:	0	:	None	:	False	:	False	:	NonNegativeReals
	(5,	10)	:	0	:	0	:	None	:	False	:	False	:	NonNegativeReals
	(5,	11)	:	0	:	0	:	None	:	False	:	False	:	NonNegativeReals
	(6,	1)	:	0	:	0	:	None	:	False	:	False	:	NonNegativeReals
	(6,	2)	:	0	:	0	:	None	:	False	:	False	:	NonNegativeReals
	(6,	3)	:	0	:	0	:	None	:	False	:	False	:	NonNegativeReals
	(6,	4)	:	0	:	0	:	None	:	False	:	False	:	NonNegativeReals
	(6,	5)	:	0	:	0	:	None	:	False	:	False	:	NonNegativeReals
	(6,	6)	:	0	:	0	:	None	:	False	:	False	:	NonNegativeReals
	(6,	7)	:	0	:	0	:	None	:	False	:	False	:	NonNegativeReals
	(6,	8)	:	0	:	0	:	None	:	False	:	False	:	NonNegativeReals
	(6,	9)	:	0	:	0	:	None	:	False	:	False	:	NonNegativeReals
	(6,	10)	:	0	:	0	:	None	:	False	:	False	:	NonNegativeReals
	(6,	11)	:	0	:	0	:	None	:	False	:	False	:	NonNegativeReals
	(7,	1)	:	0	:	0	:	None	:	False	:	False	:	NonNegativeReals
	(7,	2)	:	0	:	0	:	None	:	False	:	False	:	NonNegativeReals
	(7,	3)	:	0	:	0	:	None	:	False	:	False	:	NonNegativeReals
	(7,	4)	:	0	:	0	:	None	:	False	:	False	:	NonNegativeReals
	(7,	5)	:	0	:	0	:	None	:	False	:	False	:	NonNegativeReals
	(7,	6)	:	0	:	0	:	None	:	False	:	False	:	NonNegativeReals
	(7,	7)	:	0	:	5.42237	:	None	:	False	:	False	:	NonNegativeReals
	(7,	8)	:	0	:	0	:	None	:	False	:	False	:	NonNegativeReals
	(7,	9)	:	0	:	0	:	None	:	False	:	False	:	NonNegativeReals
	(7,	10)	:	0	:	0	:	None	:	False	:	False	:	NonNegativeReals
	(7,	11)	:	0	:	0	:	None	:	False	:	False	:	NonNegativeReals
	(8,	1)	:	0	:	0	:	None	:	False	:	False	:	NonNegativeReals
	(8,	2)	:	0	:	0	:	None	:	False	:	False	:	NonNegativeReals
	(8,	3)	:	0	:	4.56267	:	None	:	False	:	False	:	NonNegativeReals
	(8,	4)	:	0	:	0	:	None	:	False	:	False	:	NonNegativeReals
	(8,	5)	:	0	:	0	:	None	:	False	:	False	:	NonNegativeReals
	(8,	6)	:	0	:	0	:	None	:	False	:	False	:	NonNegativeReals
	(8,	7)	:	0	:	0	:	None	:	False	:	False	:	NonNegativeReals
	(8,	8)	:	0	:	0	:	None	:	False	:	False	:	NonNegativeReals
	(8,	9)	:	0	:	0	:	None	:	False	:	False	:	NonNegativeReals
	(8,	10)	:	0	:	0	:	None	:	False	:	False	:	NonNegativeReals
	(8,	11)	:	0	:	0	:	None	:	False	:	False	:	NonNegativeReals
	(9,	1)	:	0	:	0	:	None	:	False	:	False	:	NonNegativeReals
	(9,	2)	:	0	:	0	:	None	:	False	:	False	:	NonNegativeReals
	(9,	3)	:	0	:	0	:	None	:	False	:	False	:	NonNegativeReals
	(9,	4)	:	0	:	0	:	None	:	False	:	False	:	NonNegativeReals
	(9,	5)	:	0	:	0	:	None	:	False	:	False	:	NonNegativeReals
	(9,	6)	:	0	:	0	:	None	:	False	:	False	:	NonNegativeReals
	(9,	7)	:	0	:	0	:	None	:	False	:	False	:	NonNegativeReals
	(9,	8)	:	0	:	0	:	None	:	False	:	False	:	NonNegativeReals
	(9,	9)	:	0	:	0	:	None	:	False	:	False	:	NonNegativeReals
	(9,	10)	:	0	:	0	:	None	:	False	:	False	:	NonNegativeReals
	(9,	11)	:	0	:	495.635	:	None	:	False	:	False	:	NonNegativeReals
	(10,	1)	:	0	:	0	:	None	:	False	:	False	:	NonNegativeReals
	(10,	2)	:	0	:	0	:	None	:	False	:	False	:	NonNegativeReals
	(10,	3)	:	0	:	0	:	None	:	False	:	False	:	NonNegativeReals
	(10,	4)	:	0	:	0	:	None	:	False	:	False	:	NonNegativeReals
	(10,	5)	:	0	:	0	:	None	:	False	:	False	:	NonNegativeReals
	(10,	6)	:	0	:	0	:	None	:	False	:	False	:	NonNegativeReals
	(10,	7)	:	0	:	0	:	None	:	False	:	False	:	NonNegativeReals
	(10,	8)	:	0	:	0	:	None	:	False	:	False	:	NonNegativeReals
	(10,	9)	:	0	:	0	:	None	:	False	:	False	:	NonNegativeReals
	(10,	10)	:	0	:	0	:	None	:	False	:	False	:	NonNegativeReals
	(10,	11)	:	0	:	0	:	None	:	False	:	False	:	NonNegativeReals
	(11,	1)	:	0	:	0	:	None	:	False	:	False	:	NonNegativeReals
	(11,	2)	:	0	:	0	:	None	:	False	:	False	:	NonNegativeReals
	(11,	3)	:	0	:	0	:	None	:	False	:	False	:	NonNegativeReals
	(11,	4)	:	0	:	0	:	None	:	False	:	False	:	NonNegativeReals
	(11,	5)	:	0	:	0	:	None	:	False	:	False	:	NonNegativeReals
	(11,	6)	:	0	:	1113.66	:	None	:	False	:	False	:	NonNegativeReals
	(11,	7)	:	0	:	0	:	None	:	False	:	False	:	NonNegativeReals
	(11,	8)	:	0	:	0	:	None	:	False	:	False	:	NonNegativeReals
	(11,	9)	:	0	:	0	:	None	:	False	:	False	:	NonNegativeReals
	(11,	10)	:	0	:	0	:	None	:	False	:	False	:	NonNegativeReals
	(11,	11)	:	0	:	0	:	None	:	False	:	False	:	NonNegativeReals
	(12,	1)	:	0	:	385.5	:	None	:	False	:	False	:	NonNegativeReals
	(12,	2)	:	0	:	0	:	None	:	False	:	False	:	NonNegativeReals
	(12,	3)	:	0	:	0	:	None	:	False	:	False	:	NonNegativeReals
	(12,	4)	:	0	:	0	:	None	:	False	:	False	:	NonNegativeReals
	(12,	5)	:	0	:	0	:	None	:	False	:	False	:	NonNegativeReals
	(12,	6)	:	0	:	0	:	None	:	False	:	False	:	NonNegativeReals
	(12,	7)	:	0	:	0	:	None	:	False	:	False	:	NonNegativeReals
	(12,	8)	:	0	:	0	:	None	:	False	:	False	:	NonNegativeReals
	(12,	9)	:	0	:	0	:	None	:	False	:	False	:	NonNegativeReals
	(12,	10)	:	0	:	0	:	None	:	False	:	False	:	NonNegativeReals
	(12,	11)	:	0	:	0	:	None	:	False	:	False	:	NonNegativeReals
	(13,	1)	:	0	:	0	:	None	:	False	:	False	:	NonNegativeReals
	(13,	2)	:	0	:	0	:	None	:	False	:	False	:	NonNegativeReals
	(13,	3)	:	0	:	0	:	None	:	False	:	False	:	NonNegativeReals
	(13,	4)	:	0	:	0	:	None	:	False	:	False	:	NonNegativeReals
	(13,	5)	:	0	:	0	:	None	:	False	:	False	:	NonNegativeReals
	(13,	6)	:	0	:	0	:	None	:	False	:	False	:	NonNegativeReals
	(13,	7)	:	0	:	0	:	None	:	False	:	False	:	NonNegativeReals
	(13,	8)	:	0	:	0	:	None	:	False	:	False	:	NonNegativeReals
	(13,	9)	:	0	:	0	:	None	:	False	:	False	:	NonNegativeReals
	(13,	10)	:	0	:	0	:	None	:	False	:	False	:	NonNegativeReals
	(13,	11)	:	0	:	0	:	None	:	False	:	False	:	NonNegativeReals
	(14,	1)	:	0	:	0	:	None	:	False	:	False	:	NonNegativeReals
	(14,	2)	:	0	:	0	:	None	:	False	:	False	:	NonNegativeReals
	(14,	3)	:	0	:	0	:	None	:	False	:	False	:	NonNegativeReals
	(14,	4)	:	0	:	0	:	None	:	False	:	False	:	NonNegativeReals
	(14,	5)	:	0	:	0	:	None	:	False	:	False	:	NonNegativeReals
	(14,	6)	:	0	:	0	:	None	:	False	:	False	:	NonNegativeReals
	(14,	7)	:	0	:	0	:	None	:	False	:	False	:	NonNegativeReals
	(14,	8)	:	0	:	0	:	None	:	False	:	False	:	NonNegativeReals
	(14,	9)	:	0	:	0	:	None	:	False	:	False	:	NonNegativeReals
	(14,	10)	:	0	:	0	:	None	:	False	:	False	:	NonNegativeReals
	(14,	11)	:	0	:	0	:	None	:	False	:	False	:	NonNegativeReals
	(15,	1)	:	0	:	9236.69	:	None	:	False	:	False	:	NonNegativeReals
	(15,	2)	:	0	:	0	:	None	:	False	:	False	:	NonNegativeReals
	(15,	3)	:	0	:	0	:	None	:	False	:	False	:	NonNegativeReals
	(15,	4)	:	0	:	0	:	None	:	False	:	False	:	NonNegativeReals
	(15,	5)	:	0	:	0	:	None	:	False	:	False	:	NonNegativeReals
	(15,	6)	:	0	:	0	:	None	:	False	:	False	:	NonNegativeReals
	(15,	7)	:	0	:	0	:	None	:	False	:	False	:	NonNegativeReals
	(15,	8)	:	0	:	0	:	None	:	False	:	False	:	NonNegativeReals
	(15,	9)	:	0	:	0	:	None	:	False	:	False	:	NonNegativeReals
	(15,	10)	:	0	:	0	:	None	:	False	:	False	:	NonNegativeReals
	(15,	11)	:	0	:	0	:	None	:	False	:	False	:	NonNegativeReals
	(16,	1)	:	0	:	0	:	None	:	False	:	False	:	NonNegativeReals
	(16,	2)	:	0	:	0	:	None	:	False	:	False	:	NonNegativeReals
	(16,	3)	:	0	:	0	:	None	:	False	:	False	:	NonNegativeReals
	(16,	4)	:	0	:	0	:	None	:	False	:	False	:	NonNegativeReals
	(16,	5)	:	0	:	0	:	None	:	False	:	False	:	NonNegativeReals
	(16,	6)	:	0	:	0	:	None	:	False	:	False	:	NonNegativeReals
	(16,	7)	:	0	:	0	:	None	:	False	:	False	:	NonNegativeReals
	(16,	8)	:	0	:	0	:	None	:	False	:	False	:	NonNegativeReals
	(16,	9)	:	0	:	0	:	None	:	False	:	False	:	NonNegativeReals
	(16,	10)	:	0	:	0	:	None	:	False	:	False	:	NonNegativeReals
	(16,	11)	:	0	:	0	:	None	:	False	:	False	:	NonNegativeReals
	(17,	1)	:	0	:	3808.23	:	None	:	False	:	False	:	NonNegativeReals
	(17,	2)	:	0	:	0	:	None	:	False	:	False	:	NonNegativeReals
	(17,	3)	:	0	:	0	:	None	:	False	:	False	:	NonNegativeReals
	(17,	4)	:	0	:	0	:	None	:	False	:	False	:	NonNegativeReals
	(17,	5)	:	0	:	0	:	None	:	False	:	False	:	NonNegativeReals
	(17,	6)	:	0	:	0	:	None	:	False	:	False	:	NonNegativeReals
	(17,	7)	:	0	:	0	:	None	:	False	:	False	:	NonNegativeReals
	(17,	8)	:	0	:	0	:	None	:	False	:	False	:	NonNegativeReals
	(17,	9)	:	0	:	0	:	None	:	False	:	False	:	NonNegativeReals
	(17,	10)	:	0	:	0	:	None	:	False	:	False	:	NonNegativeReals
	(17,	11)	:	0	:	0	:	None	:	False	:	False	:	NonNegativeReals
	(18,	1)	:	0	:	947.105	:	None	:	False	:	False	:	NonNegativeReals
	(18,	2)	:	0	:	0	:	None	:	False	:	False	:	NonNegativeReals
	(18,	3)	:	0	:	0	:	None	:	False	:	False	:	NonNegativeReals
	(18,	4)	:	0	:	0	:	None	:	False	:	False	:	NonNegativeReals
	(18,	5)	:	0	:	0	:	None	:	False	:	False	:	NonNegativeReals
	(18,	6)	:	0	:	0	:	None	:	False	:	False	:	NonNegativeReals
	(18,	7)	:	0	:	0	:	None	:	False	:	False	:	NonNegativeReals
	(18,	8)	:	0	:	0	:	None	:	False	:	False	:	NonNegativeReals
	(18,	9)	:	0	:	0	:	None	:	False	:	False	:	NonNegativeReals
	(18,	10)	:	0	:	0	:	None	:	False	:	False	:	NonNegativeReals
	(18,	11)	:	0	:	0	:	None	:	False	:	False	:	NonNegativeReals
	(19,	1)	:	0	:	0	:	None	:	False	:	False	:	NonNegativeReals
	(19,	2)	:	0	:	0	:	None	:	False	:	False	:	NonNegativeReals
	(19,	3)	:	0	:	0	:	None	:	False	:	False	:	NonNegativeReals
	(19,	4)	:	0	:	0	:	None	:	False	:	False	:	NonNegativeReals
	(19,	5)	:	0	:	0	:	None	:	False	:	False	:	NonNegativeReals
	(19,	6)	:	0	:	0	:	None	:	False	:	False	:	NonNegativeReals
	(19,	7)	:	0	:	0	:	None	:	False	:	False	:	NonNegativeReals
	(19,	8)	:	0	:	0	:	None	:	False	:	False	:	NonNegativeReals
	(19,	9)	:	0	:	0	:	None	:	False	:	False	:	NonNegativeReals
	(19,	10)	:	0	:	0	:	None	:	False	:	False	:	NonNegativeReals
	(19,	11)	:	0	:	0	:	None	:	False	:	False	:	NonNegativeReals
	(20,	1)	:	0	:	0	:	None	:	False	:	False	:	NonNegativeReals
	(20,	2)	:	0	:	0	:	None	:	False	:	False	:	NonNegativeReals
	(20,	3)	:	0	:	0	:	None	:	False	:	False	:	NonNegativeReals
	(20,	4)	:	0	:	0	:	None	:	False	:	False	:	NonNegativeReals
	(20,	5)	:	0	:	0	:	None	:	False	:	False	:	NonNegativeReals
	(20,	6)	:	0	:	0	:	None	:	False	:	False	:	NonNegativeReals
	(20,	7)	:	0	:	0	:	None	:	False	:	False	:	NonNegativeReals
	(20,	8)	:	0	:	0	:	None	:	False	:	False	:	NonNegativeReals
	(20,	9)	:	0	:	0	:	None	:	False	:	False	:	NonNegativeReals
	(20,	10)	:	0	:	0	:	None	:	False	:	False	:	NonNegativeReals
	(20,	11)	:	0	:	0	:	None	:	False	:	False	:	NonNegativeReals
	(21,	1)	:	0	:	0	:	None	:	False	:	False	:	NonNegativeReals
	(21,	2)	:	0	:	0	:	None	:	False	:	False	:	NonNegativeReals
	(21,	3)	:	0	:	0	:	None	:	False	:	False	:	NonNegativeReals
	(21,	4)	:	0	:	0	:	None	:	False	:	False	:	NonNegativeReals
	(21,	5)	:	0	:	0	:	None	:	False	:	False	:	NonNegativeReals
	(21,	6)	:	0	:	0	:	None	:	False	:	False	:	NonNegativeReals
	(21,	7)	:	0	:	0	:	None	:	False	:	False	:	NonNegativeReals
	(21,	8)	:	0	:	0	:	None	:	False	:	False	:	NonNegativeReals
	(21,	9)	:	0	:	0	:	None	:	False	:	False	:	NonNegativeReals
	(21,	10)	:	0	:	0	:	None	:	False	:	False	:	NonNegativeReals
	(21,	11)	:	0	:	0	:	None	:	False	:	False	:	NonNegativeReals
	(22,	1)	:	0	:	0	:	None	:	False	:	False	:	NonNegativeReals
	(22,	2)	:	0	:	0	:	None	:	False	:	False	:	NonNegativeReals
	(22,	3)	:	0	:	0	:	None	:	False	:	False	:	NonNegativeReals
	(22,	4)	:	0	:	0	:	None	:	False	:	False	:	NonNegativeReals
	(22,	5)	:	0	:	0	:	None	:	False	:	False	:	NonNegativeReals
	(22,	6)	:	0	:	0	:	None	:	False	:	False	:	NonNegativeReals
	(22,	7)	:	0	:	0	:	None	:	False	:	False	:	NonNegativeReals
	(22,	8)	:	0	:	0	:	None	:	False	:	False	:	NonNegativeReals
	(22,	9)	:	0	:	0	:	None	:	False	:	False	:	NonNegativeReals
	(22,	10)	:	0	:	0	:	None	:	False	:	False	:	NonNegativeReals
	(22,	11)	:	0	:	0	:	None	:	False	:	False	:	NonNegativeReals
	Objectives:
	obj	:	Size=1,	Index=None,	Active=True
	Key	:	Active	:	GWP	profit
	None	:	True	:	1.09663e+10	4.97912e+09
	Constraints:
	x_constraint	:	Size=22
	Key	:	Lower	:	Body	:	Upper
	1	:	0	:	1.81899e-12	:	0
	2	:	0	:	0	:	0
	3	:	0	:	0	:	0
	4	:	0	:	0	:	0
	5	:	0	:	0	:	0
	6	:	0	:	0	:	0
	7	:	0	:	0	:	0
	8	:	0	:	0	:	0
	9	:	0	:	0	:	0
	10	:	0	:	0	:	0
	11	:	0	:	0	:	0
	12	:	0	:	0	:	0
	13	:	0	:	0	:	0
	14	:	0	:	0	:	0
	15	:	0	:	0	:	0
	16	:	0	:	0	:	0
	17	:	0	:	0	:	0
	18	:	0	:	0	:	0
	19	:	0	:	0	:	0
	20	:	0	:	0	:	0
	21	:	0	:	0	:	0
	22	:	0	:	0	:	0
	y_constraint	:	Size=11
	Key	:	Lower	:	Body	:	Upper
	1	:	0	:	-9.09495e-13	:	0
	2	:	0	:	0	:	0
	3	:	0	:	-3.9968e-15	:	0
	4	:	0	:	0	:	0
	5	:	0	:	2.27374e-13	:	0
	6	:	0	:	-2.84217e-14	:	0
	7	:	0	:	-6.66134e-16	:	0
	8	:	0	:	0	:	0
	9	:	0	:	-2.55795e-13	:	0
	10	:	0	:	1.7053e-12	:	0
	11	:	0	:	-7.10543e-15	:	0
	y_demand_constraint	:	Size=11
	Key	:	Lower	:	Produced (1000t)	:	Demand (1000t)	percentage	profit (USD/Kiloton)	Tot profit
ETHANOL	1	:	None	:	2747.75	:	2747.75	1	708909	1.94791e+09
FURFURAL	2	:	None	:	0	:	405.55	0	1.13273e+07	0
HMF	3	:	None	:	3.22581	:	3.22581	1	2.2307e+08	7.19581e+08
FDCA	4	:	None	:	0	:	83.901	0	2.0848e+08	0
ISOPRENE	5	:	None	:	466.214	:	466.214	1	157500	7.34287e+07
SUCCINIC ACID	6	:	None	:	139.09	:	139.09	1	1292000	179704280
3HP	7	:	None	:	0.26802	:	0.26802	1	4944370000	1.32519e+09
LEVULINIC ACID	8	:	None	:	0	:	1.41097	0	1.97e+07	0
LACTIC ACID	9	:	None	:	253.953	:	253.953	1	130000	33013890
SORBITOL	10	:	None	:	866	:	866	1	700000	606200000
XYLITOL	11	:	None	:	33.25	:	33.25	1	2830000	94097500
	x_fleet_constraint	:	Size=22
	Key	:	Lower	:	Used (1000t)	:	Available (1000t)	percentage
corn	1	:	None	:	7125.63	:	10144.2	0.702432
rice grain	2	:	None	:	0	:	15996.7	0
rice hull	3	:	None	:	0	:	38142.4	0
rice bran	4	:	None	:	0	:	19071.2	0
whole wheat	5	:	None	:	7749.54	:	8336.86	0.929552
wheat bran	6	:	None	:	0	:	17385.9	0
wheat germ	7	:	None	:	5.42237	:	2634.23	0.00205843
sugarcane	8	:	None	:	4.56267	:	15189.6	0.000300381
sugarcane bagasse	9	:	None	:	495.635	:	27000	0.0183569
sugarcane molasses	10	:	None	:	0	:	2333.33	0
potato	11	:	None	:	1113.66	:	17582.7	0.0633387
potato pulp	12	:	None	:	385.5	:	385.5	1
tomato	13	:	None	:	0	:	11944.7	0
tomato pomace	14	:	None	:	0	:	351	0
sweet potato	15	:	None	:	9236.69	:	9236.69	1
sweet potato pulp	16	:	None	:	0	:	180	0
apple	17	:	None	:	3808.23	:	3808.23	1
apple pomace	18	:	None	:	947.105	:	947.105	1
orange	19	:	None	:	0	:	1671.17	0
orange peel	20	:	None	:	0	:	490.651	0
banana	21	:	None	:	0	:	900.909	0
banana peel	22	:	None	:	0	:	510.299	0

## Sheet: CN_LP_Env_eta80
Model	unknown
	Variables:
	x	:	Size=22,	Index=I
	Key	:	Lower	:	Value	:	Upper	:	Fixed	:	Stale	:	Domain
	1	:	0	:	10144.2	:	None	:	FALSE	:	FALSE	:	NonNegativeReals
	2	:	0	:	8293.65	:	None	:	FALSE	:	FALSE	:	NonNegativeReals
	3	:	0	:	687.544	:	None	:	FALSE	:	FALSE	:	NonNegativeReals
	4	:	0	:	0	:	None	:	FALSE	:	FALSE	:	NonNegativeReals
	5	:	0	:	0	:	None	:	FALSE	:	FALSE	:	NonNegativeReals
	6	:	0	:	0	:	None	:	FALSE	:	FALSE	:	NonNegativeReals
	7	:	0	:	0	:	None	:	FALSE	:	FALSE	:	NonNegativeReals
	8	:	0	:	0	:	None	:	FALSE	:	FALSE	:	NonNegativeReals
	9	:	0	:	0	:	None	:	FALSE	:	FALSE	:	NonNegativeReals
	10	:	0	:	22.2563	:	None	:	FALSE	:	FALSE	:	NonNegativeReals
	11	:	0	:	3192.95	:	None	:	FALSE	:	FALSE	:	NonNegativeReals
	12	:	0	:	385.5	:	None	:	FALSE	:	FALSE	:	NonNegativeReals
	13	:	0	:	0	:	None	:	FALSE	:	FALSE	:	NonNegativeReals
	14	:	0	:	351	:	None	:	FALSE	:	FALSE	:	NonNegativeReals
	15	:	0	:	9236.69	:	None	:	FALSE	:	FALSE	:	NonNegativeReals
	16	:	0	:	0	:	None	:	FALSE	:	FALSE	:	NonNegativeReals
	17	:	0	:	3808.23	:	None	:	FALSE	:	FALSE	:	NonNegativeReals
	18	:	0	:	947.105	:	None	:	FALSE	:	FALSE	:	NonNegativeReals
	19	:	0	:	0	:	None	:	FALSE	:	FALSE	:	NonNegativeReals
	20	:	0	:	0	:	None	:	FALSE	:	FALSE	:	NonNegativeReals
	21	:	0	:	0	:	None	:	FALSE	:	FALSE	:	NonNegativeReals
	22	:	0	:	0	:	None	:	FALSE	:	FALSE	:	NonNegativeReals
	y	:	Size=11,	Index=J
	Key	:	Lower	:	Value	:	Upper	:	Fixed	:	Stale	:	Domain
	1	:	0	:	2747.75	:	None	:	FALSE	:	FALSE	:	NonNegativeReals
	2	:	0	:	0	:	None	:	FALSE	:	FALSE	:	NonNegativeReals
	3	:	0	:	3.22581	:	None	:	FALSE	:	FALSE	:	NonNegativeReals
	4	:	0	:	0	:	None	:	FALSE	:	FALSE	:	NonNegativeReals
	5	:	0	:	466.214	:	None	:	FALSE	:	FALSE	:	NonNegativeReals
	6	:	0	:	139.09	:	None	:	FALSE	:	FALSE	:	NonNegativeReals
	7	:	0	:	0.26802	:	None	:	FALSE	:	FALSE	:	NonNegativeReals
	8	:	0	:	0	:	None	:	FALSE	:	FALSE	:	NonNegativeReals
	9	:	0	:	253.953	:	None	:	FALSE	:	FALSE	:	NonNegativeReals
	10	:	0	:	866	:	None	:	FALSE	:	FALSE	:	NonNegativeReals
	11	:	0	:	33.25	:	None	:	FALSE	:	FALSE	:	NonNegativeReals
	w	:	Size=242,	Index=I*J
	Key	:	Lower	:	Value	:	Upper	:	Fixed	:	Stale	:	Domain
	(1,	1)	:	0	:	7067.94	:	None	:	FALSE	:	FALSE	:	NonNegativeReals
	(1,	2)	:	0	:	0	:	None	:	FALSE	:	FALSE	:	NonNegativeReals
	(1,	3)	:	0	:	0	:	None	:	FALSE	:	FALSE	:	NonNegativeReals
	(1,	4)	:	0	:	0	:	None	:	FALSE	:	FALSE	:	NonNegativeReals
	(1,	5)	:	0	:	0	:	None	:	FALSE	:	FALSE	:	NonNegativeReals
	(1,	6)	:	0	:	0	:	None	:	FALSE	:	FALSE	:	NonNegativeReals
	(1,	7)	:	0	:	0	:	None	:	FALSE	:	FALSE	:	NonNegativeReals
	(1,	8)	:	0	:	0	:	None	:	FALSE	:	FALSE	:	NonNegativeReals
	(1,	9)	:	0	:	492.821	:	None	:	FALSE	:	FALSE	:	NonNegativeReals
	(1,	10)	:	0	:	2583.47	:	None	:	FALSE	:	FALSE	:	NonNegativeReals
	(1,	11)	:	0	:	0	:	None	:	FALSE	:	FALSE	:	NonNegativeReals
	(2,	1)	:	0	:	0	:	None	:	FALSE	:	FALSE	:	NonNegativeReals
	(2,	2)	:	0	:	0	:	None	:	FALSE	:	FALSE	:	NonNegativeReals
	(2,	3)	:	0	:	0	:	None	:	FALSE	:	FALSE	:	NonNegativeReals
	(2,	4)	:	0	:	0	:	None	:	FALSE	:	FALSE	:	NonNegativeReals
	(2,	5)	:	0	:	8293.65	:	None	:	FALSE	:	FALSE	:	NonNegativeReals
	(2,	6)	:	0	:	0	:	None	:	FALSE	:	FALSE	:	NonNegativeReals
	(2,	7)	:	0	:	0	:	None	:	FALSE	:	FALSE	:	NonNegativeReals
	(2,	8)	:	0	:	0	:	None	:	FALSE	:	FALSE	:	NonNegativeReals
	(2,	9)	:	0	:	0	:	None	:	FALSE	:	FALSE	:	NonNegativeReals
	(2,	10)	:	0	:	0	:	None	:	FALSE	:	FALSE	:	NonNegativeReals
	(2,	11)	:	0	:	0	:	None	:	FALSE	:	FALSE	:	NonNegativeReals
	(3,	1)	:	0	:	0	:	None	:	FALSE	:	FALSE	:	NonNegativeReals
	(3,	2)	:	0	:	0	:	None	:	FALSE	:	FALSE	:	NonNegativeReals
	(3,	3)	:	0	:	0	:	None	:	FALSE	:	FALSE	:	NonNegativeReals
	(3,	4)	:	0	:	0	:	None	:	FALSE	:	FALSE	:	NonNegativeReals
	(3,	5)	:	0	:	0	:	None	:	FALSE	:	FALSE	:	NonNegativeReals
	(3,	6)	:	0	:	0	:	None	:	FALSE	:	FALSE	:	NonNegativeReals
	(3,	7)	:	0	:	2.6802	:	None	:	FALSE	:	FALSE	:	NonNegativeReals
	(3,	8)	:	0	:	0	:	None	:	FALSE	:	FALSE	:	NonNegativeReals
	(3,	9)	:	0	:	0	:	None	:	FALSE	:	FALSE	:	NonNegativeReals
	(3,	10)	:	0	:	0	:	None	:	FALSE	:	FALSE	:	NonNegativeReals
	(3,	11)	:	0	:	684.863	:	None	:	FALSE	:	FALSE	:	NonNegativeReals
	(4,	1)	:	0	:	0	:	None	:	FALSE	:	FALSE	:	NonNegativeReals
	(4,	2)	:	0	:	0	:	None	:	FALSE	:	FALSE	:	NonNegativeReals
	(4,	3)	:	0	:	0	:	None	:	FALSE	:	FALSE	:	NonNegativeReals
	(4,	4)	:	0	:	0	:	None	:	FALSE	:	FALSE	:	NonNegativeReals
	(4,	5)	:	0	:	0	:	None	:	FALSE	:	FALSE	:	NonNegativeReals
	(4,	6)	:	0	:	0	:	None	:	FALSE	:	FALSE	:	NonNegativeReals
	(4,	7)	:	0	:	0	:	None	:	FALSE	:	FALSE	:	NonNegativeReals
	(4,	8)	:	0	:	0	:	None	:	FALSE	:	FALSE	:	NonNegativeReals
	(4,	9)	:	0	:	0	:	None	:	FALSE	:	FALSE	:	NonNegativeReals
	(4,	10)	:	0	:	0	:	None	:	FALSE	:	FALSE	:	NonNegativeReals
	(4,	11)	:	0	:	0	:	None	:	FALSE	:	FALSE	:	NonNegativeReals
	(5,	1)	:	0	:	0	:	None	:	FALSE	:	FALSE	:	NonNegativeReals
	(5,	2)	:	0	:	0	:	None	:	FALSE	:	FALSE	:	NonNegativeReals
	(5,	3)	:	0	:	0	:	None	:	FALSE	:	FALSE	:	NonNegativeReals
	(5,	4)	:	0	:	0	:	None	:	FALSE	:	FALSE	:	NonNegativeReals
	(5,	5)	:	0	:	0	:	None	:	FALSE	:	FALSE	:	NonNegativeReals
	(5,	6)	:	0	:	0	:	None	:	FALSE	:	FALSE	:	NonNegativeReals
	(5,	7)	:	0	:	0	:	None	:	FALSE	:	FALSE	:	NonNegativeReals
	(5,	8)	:	0	:	0	:	None	:	FALSE	:	FALSE	:	NonNegativeReals
	(5,	9)	:	0	:	0	:	None	:	FALSE	:	FALSE	:	NonNegativeReals
	(5,	10)	:	0	:	0	:	None	:	FALSE	:	FALSE	:	NonNegativeReals
	(5,	11)	:	0	:	0	:	None	:	FALSE	:	FALSE	:	NonNegativeReals
	(6,	1)	:	0	:	0	:	None	:	FALSE	:	FALSE	:	NonNegativeReals
	(6,	2)	:	0	:	0	:	None	:	FALSE	:	FALSE	:	NonNegativeReals
	(6,	3)	:	0	:	0	:	None	:	FALSE	:	FALSE	:	NonNegativeReals
	(6,	4)	:	0	:	0	:	None	:	FALSE	:	FALSE	:	NonNegativeReals
	(6,	5)	:	0	:	0	:	None	:	FALSE	:	FALSE	:	NonNegativeReals
	(6,	6)	:	0	:	0	:	None	:	FALSE	:	FALSE	:	NonNegativeReals
	(6,	7)	:	0	:	0	:	None	:	FALSE	:	FALSE	:	NonNegativeReals
	(6,	8)	:	0	:	0	:	None	:	FALSE	:	FALSE	:	NonNegativeReals
	(6,	9)	:	0	:	0	:	None	:	FALSE	:	FALSE	:	NonNegativeReals
	(6,	10)	:	0	:	0	:	None	:	FALSE	:	FALSE	:	NonNegativeReals
	(6,	11)	:	0	:	0	:	None	:	FALSE	:	FALSE	:	NonNegativeReals
	(7,	1)	:	0	:	0	:	None	:	FALSE	:	FALSE	:	NonNegativeReals
	(7,	2)	:	0	:	0	:	None	:	FALSE	:	FALSE	:	NonNegativeReals
	(7,	3)	:	0	:	0	:	None	:	FALSE	:	FALSE	:	NonNegativeReals
	(7,	4)	:	0	:	0	:	None	:	FALSE	:	FALSE	:	NonNegativeReals
	(7,	5)	:	0	:	0	:	None	:	FALSE	:	FALSE	:	NonNegativeReals
	(7,	6)	:	0	:	0	:	None	:	FALSE	:	FALSE	:	NonNegativeReals
	(7,	7)	:	0	:	0	:	None	:	FALSE	:	FALSE	:	NonNegativeReals
	(7,	8)	:	0	:	0	:	None	:	FALSE	:	FALSE	:	NonNegativeReals
	(7,	9)	:	0	:	0	:	None	:	FALSE	:	FALSE	:	NonNegativeReals
	(7,	10)	:	0	:	0	:	None	:	FALSE	:	FALSE	:	NonNegativeReals
	(7,	11)	:	0	:	0	:	None	:	FALSE	:	FALSE	:	NonNegativeReals
	(8,	1)	:	0	:	0	:	None	:	FALSE	:	FALSE	:	NonNegativeReals
	(8,	2)	:	0	:	0	:	None	:	FALSE	:	FALSE	:	NonNegativeReals
	(8,	3)	:	0	:	0	:	None	:	FALSE	:	FALSE	:	NonNegativeReals
	(8,	4)	:	0	:	0	:	None	:	FALSE	:	FALSE	:	NonNegativeReals
	(8,	5)	:	0	:	0	:	None	:	FALSE	:	FALSE	:	NonNegativeReals
	(8,	6)	:	0	:	0	:	None	:	FALSE	:	FALSE	:	NonNegativeReals
	(8,	7)	:	0	:	0	:	None	:	FALSE	:	FALSE	:	NonNegativeReals
	(8,	8)	:	0	:	0	:	None	:	FALSE	:	FALSE	:	NonNegativeReals
	(8,	9)	:	0	:	0	:	None	:	FALSE	:	FALSE	:	NonNegativeReals
	(8,	10)	:	0	:	0	:	None	:	FALSE	:	FALSE	:	NonNegativeReals
	(8,	11)	:	0	:	0	:	None	:	FALSE	:	FALSE	:	NonNegativeReals
	(9,	1)	:	0	:	0	:	None	:	FALSE	:	FALSE	:	NonNegativeReals
	(9,	2)	:	0	:	0	:	None	:	FALSE	:	FALSE	:	NonNegativeReals
	(9,	3)	:	0	:	0	:	None	:	FALSE	:	FALSE	:	NonNegativeReals
	(9,	4)	:	0	:	0	:	None	:	FALSE	:	FALSE	:	NonNegativeReals
	(9,	5)	:	0	:	0	:	None	:	FALSE	:	FALSE	:	NonNegativeReals
	(9,	6)	:	0	:	0	:	None	:	FALSE	:	FALSE	:	NonNegativeReals
	(9,	7)	:	0	:	0	:	None	:	FALSE	:	FALSE	:	NonNegativeReals
	(9,	8)	:	0	:	0	:	None	:	FALSE	:	FALSE	:	NonNegativeReals
	(9,	9)	:	0	:	0	:	None	:	FALSE	:	FALSE	:	NonNegativeReals
	(9,	10)	:	0	:	0	:	None	:	FALSE	:	FALSE	:	NonNegativeReals
	(9,	11)	:	0	:	0	:	None	:	FALSE	:	FALSE	:	NonNegativeReals
	(10,	1)	:	0	:	0	:	None	:	FALSE	:	FALSE	:	NonNegativeReals
	(10,	2)	:	0	:	0	:	None	:	FALSE	:	FALSE	:	NonNegativeReals
	(10,	3)	:	0	:	22.2563	:	None	:	FALSE	:	FALSE	:	NonNegativeReals
	(10,	4)	:	0	:	0	:	None	:	FALSE	:	FALSE	:	NonNegativeReals
	(10,	5)	:	0	:	0	:	None	:	FALSE	:	FALSE	:	NonNegativeReals
	(10,	6)	:	0	:	0	:	None	:	FALSE	:	FALSE	:	NonNegativeReals
	(10,	7)	:	0	:	0	:	None	:	FALSE	:	FALSE	:	NonNegativeReals
	(10,	8)	:	0	:	0	:	None	:	FALSE	:	FALSE	:	NonNegativeReals
	(10,	9)	:	0	:	0	:	None	:	FALSE	:	FALSE	:	NonNegativeReals
	(10,	10)	:	0	:	0	:	None	:	FALSE	:	FALSE	:	NonNegativeReals
	(10,	11)	:	0	:	0	:	None	:	FALSE	:	FALSE	:	NonNegativeReals
	(11,	1)	:	0	:	3192.95	:	None	:	FALSE	:	FALSE	:	NonNegativeReals
	(11,	2)	:	0	:	0	:	None	:	FALSE	:	FALSE	:	NonNegativeReals
	(11,	3)	:	0	:	0	:	None	:	FALSE	:	FALSE	:	NonNegativeReals
	(11,	4)	:	0	:	0	:	None	:	FALSE	:	FALSE	:	NonNegativeReals
	(11,	5)	:	0	:	0	:	None	:	FALSE	:	FALSE	:	NonNegativeReals
	(11,	6)	:	0	:	0	:	None	:	FALSE	:	FALSE	:	NonNegativeReals
	(11,	7)	:	0	:	0	:	None	:	FALSE	:	FALSE	:	NonNegativeReals
	(11,	8)	:	0	:	0	:	None	:	FALSE	:	FALSE	:	NonNegativeReals
	(11,	9)	:	0	:	0	:	None	:	FALSE	:	FALSE	:	NonNegativeReals
	(11,	10)	:	0	:	0	:	None	:	FALSE	:	FALSE	:	NonNegativeReals
	(11,	11)	:	0	:	0	:	None	:	FALSE	:	FALSE	:	NonNegativeReals
	(12,	1)	:	0	:	385.5	:	None	:	FALSE	:	FALSE	:	NonNegativeReals
	(12,	2)	:	0	:	0	:	None	:	FALSE	:	FALSE	:	NonNegativeReals
	(12,	3)	:	0	:	0	:	None	:	FALSE	:	FALSE	:	NonNegativeReals
	(12,	4)	:	0	:	0	:	None	:	FALSE	:	FALSE	:	NonNegativeReals
	(12,	5)	:	0	:	0	:	None	:	FALSE	:	FALSE	:	NonNegativeReals
	(12,	6)	:	0	:	0	:	None	:	FALSE	:	FALSE	:	NonNegativeReals
	(12,	7)	:	0	:	0	:	None	:	FALSE	:	FALSE	:	NonNegativeReals
	(12,	8)	:	0	:	0	:	None	:	FALSE	:	FALSE	:	NonNegativeReals
	(12,	9)	:	0	:	0	:	None	:	FALSE	:	FALSE	:	NonNegativeReals
	(12,	10)	:	0	:	0	:	None	:	FALSE	:	FALSE	:	NonNegativeReals
	(12,	11)	:	0	:	0	:	None	:	FALSE	:	FALSE	:	NonNegativeReals
	(13,	1)	:	0	:	0	:	None	:	FALSE	:	FALSE	:	NonNegativeReals
	(13,	2)	:	0	:	0	:	None	:	FALSE	:	FALSE	:	NonNegativeReals
	(13,	3)	:	0	:	0	:	None	:	FALSE	:	FALSE	:	NonNegativeReals
	(13,	4)	:	0	:	0	:	None	:	FALSE	:	FALSE	:	NonNegativeReals
	(13,	5)	:	0	:	0	:	None	:	FALSE	:	FALSE	:	NonNegativeReals
	(13,	6)	:	0	:	0	:	None	:	FALSE	:	FALSE	:	NonNegativeReals
	(13,	7)	:	0	:	0	:	None	:	FALSE	:	FALSE	:	NonNegativeReals
	(13,	8)	:	0	:	0	:	None	:	FALSE	:	FALSE	:	NonNegativeReals
	(13,	9)	:	0	:	0	:	None	:	FALSE	:	FALSE	:	NonNegativeReals
	(13,	10)	:	0	:	0	:	None	:	FALSE	:	FALSE	:	NonNegativeReals
	(13,	11)	:	0	:	0	:	None	:	FALSE	:	FALSE	:	NonNegativeReals
	(14,	1)	:	0	:	351	:	None	:	FALSE	:	FALSE	:	NonNegativeReals
	(14,	2)	:	0	:	0	:	None	:	FALSE	:	FALSE	:	NonNegativeReals
	(14,	3)	:	0	:	0	:	None	:	FALSE	:	FALSE	:	NonNegativeReals
	(14,	4)	:	0	:	0	:	None	:	FALSE	:	FALSE	:	NonNegativeReals
	(14,	5)	:	0	:	0	:	None	:	FALSE	:	FALSE	:	NonNegativeReals
	(14,	6)	:	0	:	0	:	None	:	FALSE	:	FALSE	:	NonNegativeReals
	(14,	7)	:	0	:	0	:	None	:	FALSE	:	FALSE	:	NonNegativeReals
	(14,	8)	:	0	:	0	:	None	:	FALSE	:	FALSE	:	NonNegativeReals
	(14,	9)	:	0	:	0	:	None	:	FALSE	:	FALSE	:	NonNegativeReals
	(14,	10)	:	0	:	0	:	None	:	FALSE	:	FALSE	:	NonNegativeReals
	(14,	11)	:	0	:	0	:	None	:	FALSE	:	FALSE	:	NonNegativeReals
	(15,	1)	:	0	:	9236.69	:	None	:	FALSE	:	FALSE	:	NonNegativeReals
	(15,	2)	:	0	:	0	:	None	:	FALSE	:	FALSE	:	NonNegativeReals
	(15,	3)	:	0	:	0	:	None	:	FALSE	:	FALSE	:	NonNegativeReals
	(15,	4)	:	0	:	0	:	None	:	FALSE	:	FALSE	:	NonNegativeReals
	(15,	5)	:	0	:	0	:	None	:	FALSE	:	FALSE	:	NonNegativeReals
	(15,	6)	:	0	:	0	:	None	:	FALSE	:	FALSE	:	NonNegativeReals
	(15,	7)	:	0	:	0	:	None	:	FALSE	:	FALSE	:	NonNegativeReals
	(15,	8)	:	0	:	0	:	None	:	FALSE	:	FALSE	:	NonNegativeReals
	(15,	9)	:	0	:	0	:	None	:	FALSE	:	FALSE	:	NonNegativeReals
	(15,	10)	:	0	:	0	:	None	:	FALSE	:	FALSE	:	NonNegativeReals
	(15,	11)	:	0	:	0	:	None	:	FALSE	:	FALSE	:	NonNegativeReals
	(16,	1)	:	0	:	0	:	None	:	FALSE	:	FALSE	:	NonNegativeReals
	(16,	2)	:	0	:	0	:	None	:	FALSE	:	FALSE	:	NonNegativeReals
	(16,	3)	:	0	:	0	:	None	:	FALSE	:	FALSE	:	NonNegativeReals
	(16,	4)	:	0	:	0	:	None	:	FALSE	:	FALSE	:	NonNegativeReals
	(16,	5)	:	0	:	0	:	None	:	FALSE	:	FALSE	:	NonNegativeReals
	(16,	6)	:	0	:	0	:	None	:	FALSE	:	FALSE	:	NonNegativeReals
	(16,	7)	:	0	:	0	:	None	:	FALSE	:	FALSE	:	NonNegativeReals
	(16,	8)	:	0	:	0	:	None	:	FALSE	:	FALSE	:	NonNegativeReals
	(16,	9)	:	0	:	0	:	None	:	FALSE	:	FALSE	:	NonNegativeReals
	(16,	10)	:	0	:	0	:	None	:	FALSE	:	FALSE	:	NonNegativeReals
	(16,	11)	:	0	:	0	:	None	:	FALSE	:	FALSE	:	NonNegativeReals
	(17,	1)	:	0	:	77.0823	:	None	:	FALSE	:	FALSE	:	NonNegativeReals
	(17,	2)	:	0	:	0	:	None	:	FALSE	:	FALSE	:	NonNegativeReals
	(17,	3)	:	0	:	0	:	None	:	FALSE	:	FALSE	:	NonNegativeReals
	(17,	4)	:	0	:	0	:	None	:	FALSE	:	FALSE	:	NonNegativeReals
	(17,	5)	:	0	:	0	:	None	:	FALSE	:	FALSE	:	NonNegativeReals
	(17,	6)	:	0	:	3731.15	:	None	:	FALSE	:	FALSE	:	NonNegativeReals
	(17,	7)	:	0	:	0	:	None	:	FALSE	:	FALSE	:	NonNegativeReals
	(17,	8)	:	0	:	0	:	None	:	FALSE	:	FALSE	:	NonNegativeReals
	(17,	9)	:	0	:	0	:	None	:	FALSE	:	FALSE	:	NonNegativeReals
	(17,	10)	:	0	:	0	:	None	:	FALSE	:	FALSE	:	NonNegativeReals
	(17,	11)	:	0	:	0	:	None	:	FALSE	:	FALSE	:	NonNegativeReals
	(18,	1)	:	0	:	947.105	:	None	:	FALSE	:	FALSE	:	NonNegativeReals
	(18,	2)	:	0	:	0	:	None	:	FALSE	:	FALSE	:	NonNegativeReals
	(18,	3)	:	0	:	0	:	None	:	FALSE	:	FALSE	:	NonNegativeReals
	(18,	4)	:	0	:	0	:	None	:	FALSE	:	FALSE	:	NonNegativeReals
	(18,	5)	:	0	:	0	:	None	:	FALSE	:	FALSE	:	NonNegativeReals
	(18,	6)	:	0	:	0	:	None	:	FALSE	:	FALSE	:	NonNegativeReals
	(18,	7)	:	0	:	0	:	None	:	FALSE	:	FALSE	:	NonNegativeReals
	(18,	8)	:	0	:	0	:	None	:	FALSE	:	FALSE	:	NonNegativeReals
	(18,	9)	:	0	:	0	:	None	:	FALSE	:	FALSE	:	NonNegativeReals
	(18,	10)	:	0	:	0	:	None	:	FALSE	:	FALSE	:	NonNegativeReals
	(18,	11)	:	0	:	0	:	None	:	FALSE	:	FALSE	:	NonNegativeReals
	(19,	1)	:	0	:	0	:	None	:	FALSE	:	FALSE	:	NonNegativeReals
	(19,	2)	:	0	:	0	:	None	:	FALSE	:	FALSE	:	NonNegativeReals
	(19,	3)	:	0	:	0	:	None	:	FALSE	:	FALSE	:	NonNegativeReals
	(19,	4)	:	0	:	0	:	None	:	FALSE	:	FALSE	:	NonNegativeReals
	(19,	5)	:	0	:	0	:	None	:	FALSE	:	FALSE	:	NonNegativeReals
	(19,	6)	:	0	:	0	:	None	:	FALSE	:	FALSE	:	NonNegativeReals
	(19,	7)	:	0	:	0	:	None	:	FALSE	:	FALSE	:	NonNegativeReals
	(19,	8)	:	0	:	0	:	None	:	FALSE	:	FALSE	:	NonNegativeReals
	(19,	9)	:	0	:	0	:	None	:	FALSE	:	FALSE	:	NonNegativeReals
	(19,	10)	:	0	:	0	:	None	:	FALSE	:	FALSE	:	NonNegativeReals
	(19,	11)	:	0	:	0	:	None	:	FALSE	:	FALSE	:	NonNegativeReals
	(20,	1)	:	0	:	0.0	:	None	:	FALSE	:	FALSE	:	NonNegativeReals
	(20,	2)	:	0	:	0	:	None	:	FALSE	:	FALSE	:	NonNegativeReals
	(20,	3)	:	0	:	0	:	None	:	FALSE	:	FALSE	:	NonNegativeReals
	(20,	4)	:	0	:	0	:	None	:	FALSE	:	FALSE	:	NonNegativeReals
	(20,	5)	:	0	:	0	:	None	:	FALSE	:	FALSE	:	NonNegativeReals
	(20,	6)	:	0	:	0	:	None	:	FALSE	:	FALSE	:	NonNegativeReals
	(20,	7)	:	0	:	0	:	None	:	FALSE	:	FALSE	:	NonNegativeReals
	(20,	8)	:	0	:	0	:	None	:	FALSE	:	FALSE	:	NonNegativeReals
	(20,	9)	:	0	:	0	:	None	:	FALSE	:	FALSE	:	NonNegativeReals
	(20,	10)	:	0	:	0	:	None	:	FALSE	:	FALSE	:	NonNegativeReals
	(20,	11)	:	0	:	0	:	None	:	FALSE	:	FALSE	:	NonNegativeReals
	(21,	1)	:	0	:	0	:	None	:	FALSE	:	FALSE	:	NonNegativeReals
	(21,	2)	:	0	:	0	:	None	:	FALSE	:	FALSE	:	NonNegativeReals
	(21,	3)	:	0	:	0	:	None	:	FALSE	:	FALSE	:	NonNegativeReals
	(21,	4)	:	0	:	0	:	None	:	FALSE	:	FALSE	:	NonNegativeReals
	(21,	5)	:	0	:	0	:	None	:	FALSE	:	FALSE	:	NonNegativeReals
	(21,	6)	:	0	:	0	:	None	:	FALSE	:	FALSE	:	NonNegativeReals
	(21,	7)	:	0	:	0	:	None	:	FALSE	:	FALSE	:	NonNegativeReals
	(21,	8)	:	0	:	0	:	None	:	FALSE	:	FALSE	:	NonNegativeReals
	(21,	9)	:	0	:	0	:	None	:	FALSE	:	FALSE	:	NonNegativeReals
	(21,	10)	:	0	:	0	:	None	:	FALSE	:	FALSE	:	NonNegativeReals
	(21,	11)	:	0	:	0	:	None	:	FALSE	:	FALSE	:	NonNegativeReals
	(22,	1)	:	0	:	0	:	None	:	FALSE	:	FALSE	:	NonNegativeReals
	(22,	2)	:	0	:	0	:	None	:	FALSE	:	FALSE	:	NonNegativeReals
	(22,	3)	:	0	:	0	:	None	:	FALSE	:	FALSE	:	NonNegativeReals
	(22,	4)	:	0	:	0	:	None	:	FALSE	:	FALSE	:	NonNegativeReals
	(22,	5)	:	0	:	0	:	None	:	FALSE	:	FALSE	:	NonNegativeReals
	(22,	6)	:	0	:	0	:	None	:	FALSE	:	FALSE	:	NonNegativeReals
	(22,	7)	:	0	:	0	:	None	:	FALSE	:	FALSE	:	NonNegativeReals
	(22,	8)	:	0	:	0	:	None	:	FALSE	:	FALSE	:	NonNegativeReals
	(22,	9)	:	0	:	0	:	None	:	FALSE	:	FALSE	:	NonNegativeReals
	(22,	10)	:	0	:	0	:	None	:	FALSE	:	FALSE	:	NonNegativeReals
	(22,	11)	:	0	:	0	:	None	:	FALSE	:	FALSE	:	NonNegativeReals
	Objectives:
	obj	:	Size=1,	Index=None,	Active=True
	Key	:	Active	:	Value	profit
	None	:	TRUE	:	1.09663e+10	4.97912e+09
	Constraints:
	x_constraint	:	Size=22
	Key	:	Lower	:	Body	:	Upper
	1	:	0	:	3.81988e-11	:	0
	2	:	0	:	0	:	0
	3	:	0	:	1.13687e-13	:	0
	4	:	0	:	0	:	0
	5	:	0	:	0	:	0
	6	:	0	:	0	:	0
	7	:	0	:	0	:	0
	8	:	0	:	0	:	0
	9	:	0	:	0	:	0
	10	:	0	:	0	:	0
	11	:	0	:	0	:	0
	12	:	0	:	0	:	0
	13	:	0	:	0	:	0
	14	:	0	:	0	:	0
	15	:	0	:	0	:	0
	16	:	0	:	0	:	0
	17	:	0	:	-3.63798e-12	:	0
	18	:	0	:	0	:	0
	19	:	0	:	0	:	0
	20	:	0	:	0	:	0
	21	:	0	:	0	:	0
	22	:	0	:	0	:	0
	y_constraint	:	Size=11
	Key	:	Lower	:	Body	:	Upper
	1	:	0	:	4.54747e-13	:	0
	2	:	0	:	0	:	0
	3	:	0	:	4.44089e-16	:	0
	4	:	0	:	0	:	0
	5	:	0	:	5.68434e-14	:	0
	6	:	0	:	-1.42109e-13	:	0
	7	:	0	:	-5.55112e-17	:	0
	8	:	0	:	0	:	0
	9	:	0	:	1.42109e-13	:	0
	10	:	0	:	0	:	0
	11	:	0	:	-7.10543e-15	:	0
	y_demand_constraint	:	Size=11
	Key	:	Lower	:	Body	:	Upper	percentage	profit (USD/Kiloton)	Tot profit
	1	:	None	:	2747.75	:	2747.75	1	708909	1.94791e+09
	2	:	None	:	0	:	405.55	0	1.13273e+07	0
	3	:	None	:	3.22581	:	3.22581	1	2.2307e+08	7.19581e+08
	4	:	None	:	0	:	83.901	0	2.0848e+08	0
	5	:	None	:	466.214	:	466.214	1	157500	7.34287e+07
	6	:	None	:	139.09	:	139.09	1	1292000	179704280
	7	:	None	:	0.26802	:	0.26802	1	4944370000	1.32519e+09
	8	:	None	:	0	:	1.41097	0	1.97e+07	0
	9	:	None	:	253.953	:	253.953	1	130000	33013890
	10	:	None	:	866	:	866	1	700000	606200000
	11	:	None	:	33.25	:	33.25	1	2830000	94097500
	x_fleet_constraint	:	Size=22
	Key	:	Lower	:	Body	:	Upper
	1	:	None	:	10144.2	:	10144.2
	2	:	None	:	8293.65	:	15996.7
	3	:	None	:	687.544	:	38142.4
	4	:	None	:	0	:	19071.2
	5	:	None	:	0	:	8336.86
	6	:	None	:	0	:	17385.9
	7	:	None	:	0	:	2634.23
	8	:	None	:	0	:	15189.6
	9	:	None	:	0	:	27000
	10	:	None	:	22.2563	:	2333.33
	11	:	None	:	3192.95	:	17582.7
	12	:	None	:	385.5	:	385.5
	13	:	None	:	0	:	11944.7
	14	:	None	:	351	:	351
	15	:	None	:	9236.69	:	9236.69
	16	:	None	:	0	:	180
	17	:	None	:	3808.23	:	3808.23
	18	:	None	:	947.105	:	947.105
	19	:	None	:	0	:	1671.17
	20	:	None	:	0	:	490.651
	21	:	None	:	0	:	900.909
	22	:	None	:	0	:	510.299

## Sheet: CN_LP_Env_eta120
Model	unknown
	Variables:
	x	:	Size=22,	Index=I
	Key	:	Lower	:	Value	:	Upper	:	Fixed	:	Stale	:	Domain
	1	:	0	:	10144.2	:	None	:	FALSE	:	FALSE	:	NonNegativeReals
	2	:	0	:	4326.24	:	None	:	FALSE	:	FALSE	:	NonNegativeReals
	3	:	0	:	456.576	:	None	:	FALSE	:	FALSE	:	NonNegativeReals
	4	:	0	:	0	:	None	:	FALSE	:	FALSE	:	NonNegativeReals
	5	:	0	:	0	:	None	:	FALSE	:	FALSE	:	NonNegativeReals
	6	:	0	:	0	:	None	:	FALSE	:	FALSE	:	NonNegativeReals
	7	:	0	:	4.51864	:	None	:	FALSE	:	FALSE	:	NonNegativeReals
	8	:	0	:	3.80222	:	None	:	FALSE	:	FALSE	:	NonNegativeReals
	9	:	0	:	0	:	None	:	FALSE	:	FALSE	:	NonNegativeReals
	10	:	0	:	2333.33	:	None	:	FALSE	:	FALSE	:	NonNegativeReals
	11	:	0	:	0	:	None	:	FALSE	:	FALSE	:	NonNegativeReals
	12	:	0	:	385.5	:	None	:	FALSE	:	FALSE	:	NonNegativeReals
	13	:	0	:	4962.2	:	None	:	FALSE	:	FALSE	:	NonNegativeReals
	14	:	0	:	351	:	None	:	FALSE	:	FALSE	:	NonNegativeReals
	15	:	0	:	431.622	:	None	:	FALSE	:	FALSE	:	NonNegativeReals
	16	:	0	:	0	:	None	:	FALSE	:	FALSE	:	NonNegativeReals
	17	:	0	:	0	:	None	:	FALSE	:	FALSE	:	NonNegativeReals
	18	:	0	:	947.105	:	None	:	FALSE	:	FALSE	:	NonNegativeReals
	19	:	0	:	0	:	None	:	FALSE	:	FALSE	:	NonNegativeReals
	20	:	0	:	0	:	None	:	FALSE	:	FALSE	:	NonNegativeReals
	21	:	0	:	0	:	None	:	FALSE	:	FALSE	:	NonNegativeReals
	22	:	0	:	0	:	None	:	FALSE	:	FALSE	:	NonNegativeReals
	y	:	Size=11,	Index=J
	Key	:	Lower	:	Value	:	Upper	:	Fixed	:	Stale	:	Domain
	1	:	0	:	2747.75	:	None	:	FALSE	:	FALSE	:	NonNegativeReals
	2	:	0	:	0	:	None	:	FALSE	:	FALSE	:	NonNegativeReals
	3	:	0	:	3.22581	:	None	:	FALSE	:	FALSE	:	NonNegativeReals
	4	:	0	:	0	:	None	:	FALSE	:	FALSE	:	NonNegativeReals
	5	:	0	:	466.214	:	None	:	FALSE	:	FALSE	:	NonNegativeReals
	6	:	0	:	139.09	:	None	:	FALSE	:	FALSE	:	NonNegativeReals
	7	:	0	:	0.26802	:	None	:	FALSE	:	FALSE	:	NonNegativeReals
	8	:	0	:	0	:	None	:	FALSE	:	FALSE	:	NonNegativeReals
	9	:	0	:	253.953	:	None	:	FALSE	:	FALSE	:	NonNegativeReals
	10	:	0	:	866	:	None	:	FALSE	:	FALSE	:	NonNegativeReals
	11	:	0	:	33.25	:	None	:	FALSE	:	FALSE	:	NonNegativeReals
	w	:	Size=242,	Index=I*J
	Key	:	Lower	:	Value	:	Upper	:	Fixed	:	Stale	:	Domain
	(1,	1)	:	0	:	7976.86	:	None	:	FALSE	:	FALSE	:	NonNegativeReals
	(1,	2)	:	0	:	0	:	None	:	FALSE	:	FALSE	:	NonNegativeReals
	(1,	3)	:	0	:	0	:	None	:	FALSE	:	FALSE	:	NonNegativeReals
	(1,	4)	:	0	:	0	:	None	:	FALSE	:	FALSE	:	NonNegativeReals
	(1,	5)	:	0	:	0	:	None	:	FALSE	:	FALSE	:	NonNegativeReals
	(1,	6)	:	0	:	445.06	:	None	:	FALSE	:	FALSE	:	NonNegativeReals
	(1,	7)	:	0	:	0	:	None	:	FALSE	:	FALSE	:	NonNegativeReals
	(1,	8)	:	0	:	0	:	None	:	FALSE	:	FALSE	:	NonNegativeReals
	(1,	9)	:	0	:	0	:	None	:	FALSE	:	FALSE	:	NonNegativeReals
	(1,	10)	:	0	:	1722.32	:	None	:	FALSE	:	FALSE	:	NonNegativeReals
	(1,	11)	:	0	:	0	:	None	:	FALSE	:	FALSE	:	NonNegativeReals
	(2,	1)	:	0	:	0	:	None	:	FALSE	:	FALSE	:	NonNegativeReals
	(2,	2)	:	0	:	0	:	None	:	FALSE	:	FALSE	:	NonNegativeReals
	(2,	3)	:	0	:	0	:	None	:	FALSE	:	FALSE	:	NonNegativeReals
	(2,	4)	:	0	:	0	:	None	:	FALSE	:	FALSE	:	NonNegativeReals
	(2,	5)	:	0	:	4326.24	:	None	:	FALSE	:	FALSE	:	NonNegativeReals
	(2,	6)	:	0	:	0	:	None	:	FALSE	:	FALSE	:	NonNegativeReals
	(2,	7)	:	0	:	0	:	None	:	FALSE	:	FALSE	:	NonNegativeReals
	(2,	8)	:	0	:	0	:	None	:	FALSE	:	FALSE	:	NonNegativeReals
	(2,	9)	:	0	:	0	:	None	:	FALSE	:	FALSE	:	NonNegativeReals
	(2,	10)	:	0	:	0	:	None	:	FALSE	:	FALSE	:	NonNegativeReals
	(2,	11)	:	0	:	0	:	None	:	FALSE	:	FALSE	:	NonNegativeReals
	(3,	1)	:	0	:	0	:	None	:	FALSE	:	FALSE	:	NonNegativeReals
	(3,	2)	:	0	:	0	:	None	:	FALSE	:	FALSE	:	NonNegativeReals
	(3,	3)	:	0	:	0	:	None	:	FALSE	:	FALSE	:	NonNegativeReals
	(3,	4)	:	0	:	0	:	None	:	FALSE	:	FALSE	:	NonNegativeReals
	(3,	5)	:	0	:	0	:	None	:	FALSE	:	FALSE	:	NonNegativeReals
	(3,	6)	:	0	:	0	:	None	:	FALSE	:	FALSE	:	NonNegativeReals
	(3,	7)	:	0	:	0	:	None	:	FALSE	:	FALSE	:	NonNegativeReals
	(3,	8)	:	0	:	0	:	None	:	FALSE	:	FALSE	:	NonNegativeReals
	(3,	9)	:	0	:	0	:	None	:	FALSE	:	FALSE	:	NonNegativeReals
	(3,	10)	:	0	:	0	:	None	:	FALSE	:	FALSE	:	NonNegativeReals
	(3,	11)	:	0	:	456.576	:	None	:	FALSE	:	FALSE	:	NonNegativeReals
	(4,	1)	:	0	:	0	:	None	:	FALSE	:	FALSE	:	NonNegativeReals
	(4,	2)	:	0	:	0	:	None	:	FALSE	:	FALSE	:	NonNegativeReals
	(4,	3)	:	0	:	0	:	None	:	FALSE	:	FALSE	:	NonNegativeReals
	(4,	4)	:	0	:	0	:	None	:	FALSE	:	FALSE	:	NonNegativeReals
	(4,	5)	:	0	:	0	:	None	:	FALSE	:	FALSE	:	NonNegativeReals
	(4,	6)	:	0	:	0	:	None	:	FALSE	:	FALSE	:	NonNegativeReals
	(4,	7)	:	0	:	0	:	None	:	FALSE	:	FALSE	:	NonNegativeReals
	(4,	8)	:	0	:	0	:	None	:	FALSE	:	FALSE	:	NonNegativeReals
	(4,	9)	:	0	:	0	:	None	:	FALSE	:	FALSE	:	NonNegativeReals
	(4,	10)	:	0	:	0	:	None	:	FALSE	:	FALSE	:	NonNegativeReals
	(4,	11)	:	0	:	0	:	None	:	FALSE	:	FALSE	:	NonNegativeReals
	(5,	1)	:	0	:	0	:	None	:	FALSE	:	FALSE	:	NonNegativeReals
	(5,	2)	:	0	:	0	:	None	:	FALSE	:	FALSE	:	NonNegativeReals
	(5,	3)	:	0	:	0	:	None	:	FALSE	:	FALSE	:	NonNegativeReals
	(5,	4)	:	0	:	0	:	None	:	FALSE	:	FALSE	:	NonNegativeReals
	(5,	5)	:	0	:	0	:	None	:	FALSE	:	FALSE	:	NonNegativeReals
	(5,	6)	:	0	:	0	:	None	:	FALSE	:	FALSE	:	NonNegativeReals
	(5,	7)	:	0	:	0	:	None	:	FALSE	:	FALSE	:	NonNegativeReals
	(5,	8)	:	0	:	0	:	None	:	FALSE	:	FALSE	:	NonNegativeReals
	(5,	9)	:	0	:	0	:	None	:	FALSE	:	FALSE	:	NonNegativeReals
	(5,	10)	:	0	:	0	:	None	:	FALSE	:	FALSE	:	NonNegativeReals
	(5,	11)	:	0	:	0	:	None	:	FALSE	:	FALSE	:	NonNegativeReals
	(6,	1)	:	0	:	0	:	None	:	FALSE	:	FALSE	:	NonNegativeReals
	(6,	2)	:	0	:	0	:	None	:	FALSE	:	FALSE	:	NonNegativeReals
	(6,	3)	:	0	:	0	:	None	:	FALSE	:	FALSE	:	NonNegativeReals
	(6,	4)	:	0	:	0	:	None	:	FALSE	:	FALSE	:	NonNegativeReals
	(6,	5)	:	0	:	0	:	None	:	FALSE	:	FALSE	:	NonNegativeReals
	(6,	6)	:	0	:	0	:	None	:	FALSE	:	FALSE	:	NonNegativeReals
	(6,	7)	:	0	:	0	:	None	:	FALSE	:	FALSE	:	NonNegativeReals
	(6,	8)	:	0	:	0	:	None	:	FALSE	:	FALSE	:	NonNegativeReals
	(6,	9)	:	0	:	0	:	None	:	FALSE	:	FALSE	:	NonNegativeReals
	(6,	10)	:	0	:	0	:	None	:	FALSE	:	FALSE	:	NonNegativeReals
	(6,	11)	:	0	:	0	:	None	:	FALSE	:	FALSE	:	NonNegativeReals
	(7,	1)	:	0	:	0	:	None	:	FALSE	:	FALSE	:	NonNegativeReals
	(7,	2)	:	0	:	0	:	None	:	FALSE	:	FALSE	:	NonNegativeReals
	(7,	3)	:	0	:	0	:	None	:	FALSE	:	FALSE	:	NonNegativeReals
	(7,	4)	:	0	:	0	:	None	:	FALSE	:	FALSE	:	NonNegativeReals
	(7,	5)	:	0	:	0	:	None	:	FALSE	:	FALSE	:	NonNegativeReals
	(7,	6)	:	0	:	0	:	None	:	FALSE	:	FALSE	:	NonNegativeReals
	(7,	7)	:	0	:	4.51864	:	None	:	FALSE	:	FALSE	:	NonNegativeReals
	(7,	8)	:	0	:	0	:	None	:	FALSE	:	FALSE	:	NonNegativeReals
	(7,	9)	:	0	:	0	:	None	:	FALSE	:	FALSE	:	NonNegativeReals
	(7,	10)	:	0	:	0	:	None	:	FALSE	:	FALSE	:	NonNegativeReals
	(7,	11)	:	0	:	0	:	None	:	FALSE	:	FALSE	:	NonNegativeReals
	(8,	1)	:	0	:	0	:	None	:	FALSE	:	FALSE	:	NonNegativeReals
	(8,	2)	:	0	:	0	:	None	:	FALSE	:	FALSE	:	NonNegativeReals
	(8,	3)	:	0	:	3.80222	:	None	:	FALSE	:	FALSE	:	NonNegativeReals
	(8,	4)	:	0	:	0	:	None	:	FALSE	:	FALSE	:	NonNegativeReals
	(8,	5)	:	0	:	0	:	None	:	FALSE	:	FALSE	:	NonNegativeReals
	(8,	6)	:	0	:	0	:	None	:	FALSE	:	FALSE	:	NonNegativeReals
	(8,	7)	:	0	:	0	:	None	:	FALSE	:	FALSE	:	NonNegativeReals
	(8,	8)	:	0	:	0	:	None	:	FALSE	:	FALSE	:	NonNegativeReals
	(8,	9)	:	0	:	0	:	None	:	FALSE	:	FALSE	:	NonNegativeReals
	(8,	10)	:	0	:	0	:	None	:	FALSE	:	FALSE	:	NonNegativeReals
	(8,	11)	:	0	:	0	:	None	:	FALSE	:	FALSE	:	NonNegativeReals
	(9,	1)	:	0	:	0	:	None	:	FALSE	:	FALSE	:	NonNegativeReals
	(9,	2)	:	0	:	0	:	None	:	FALSE	:	FALSE	:	NonNegativeReals
	(9,	3)	:	0	:	0	:	None	:	FALSE	:	FALSE	:	NonNegativeReals
	(9,	4)	:	0	:	0	:	None	:	FALSE	:	FALSE	:	NonNegativeReals
	(9,	5)	:	0	:	0	:	None	:	FALSE	:	FALSE	:	NonNegativeReals
	(9,	6)	:	0	:	0	:	None	:	FALSE	:	FALSE	:	NonNegativeReals
	(9,	7)	:	0	:	0	:	None	:	FALSE	:	FALSE	:	NonNegativeReals
	(9,	8)	:	0	:	0	:	None	:	FALSE	:	FALSE	:	NonNegativeReals
	(9,	9)	:	0	:	0	:	None	:	FALSE	:	FALSE	:	NonNegativeReals
	(9,	10)	:	0	:	0	:	None	:	FALSE	:	FALSE	:	NonNegativeReals
	(9,	11)	:	0	:	0	:	None	:	FALSE	:	FALSE	:	NonNegativeReals
	(10,	1)	:	0	:	0	:	None	:	FALSE	:	FALSE	:	NonNegativeReals
	(10,	2)	:	0	:	0	:	None	:	FALSE	:	FALSE	:	NonNegativeReals
	(10,	3)	:	0	:	0	:	None	:	FALSE	:	FALSE	:	NonNegativeReals
	(10,	4)	:	0	:	0	:	None	:	FALSE	:	FALSE	:	NonNegativeReals
	(10,	5)	:	0	:	2333.33	:	None	:	FALSE	:	FALSE	:	NonNegativeReals
	(10,	6)	:	0	:	0	:	None	:	FALSE	:	FALSE	:	NonNegativeReals
	(10,	7)	:	0	:	0	:	None	:	FALSE	:	FALSE	:	NonNegativeReals
	(10,	8)	:	0	:	0	:	None	:	FALSE	:	FALSE	:	NonNegativeReals
	(10,	9)	:	0	:	0	:	None	:	FALSE	:	FALSE	:	NonNegativeReals
	(10,	10)	:	0	:	0	:	None	:	FALSE	:	FALSE	:	NonNegativeReals
	(10,	11)	:	0	:	0	:	None	:	FALSE	:	FALSE	:	NonNegativeReals
	(11,	1)	:	0	:	0	:	None	:	FALSE	:	FALSE	:	NonNegativeReals
	(11,	2)	:	0	:	0	:	None	:	FALSE	:	FALSE	:	NonNegativeReals
	(11,	3)	:	0	:	0	:	None	:	FALSE	:	FALSE	:	NonNegativeReals
	(11,	4)	:	0	:	0	:	None	:	FALSE	:	FALSE	:	NonNegativeReals
	(11,	5)	:	0	:	0	:	None	:	FALSE	:	FALSE	:	NonNegativeReals
	(11,	6)	:	0	:	0	:	None	:	FALSE	:	FALSE	:	NonNegativeReals
	(11,	7)	:	0	:	0	:	None	:	FALSE	:	FALSE	:	NonNegativeReals
	(11,	8)	:	0	:	0	:	None	:	FALSE	:	FALSE	:	NonNegativeReals
	(11,	9)	:	0	:	0	:	None	:	FALSE	:	FALSE	:	NonNegativeReals
	(11,	10)	:	0	:	0	:	None	:	FALSE	:	FALSE	:	NonNegativeReals
	(11,	11)	:	0	:	0	:	None	:	FALSE	:	FALSE	:	NonNegativeReals
	(12,	1)	:	0	:	385.5	:	None	:	FALSE	:	FALSE	:	NonNegativeReals
	(12,	2)	:	0	:	0	:	None	:	FALSE	:	FALSE	:	NonNegativeReals
	(12,	3)	:	0	:	0	:	None	:	FALSE	:	FALSE	:	NonNegativeReals
	(12,	4)	:	0	:	0	:	None	:	FALSE	:	FALSE	:	NonNegativeReals
	(12,	5)	:	0	:	0	:	None	:	FALSE	:	FALSE	:	NonNegativeReals
	(12,	6)	:	0	:	0	:	None	:	FALSE	:	FALSE	:	NonNegativeReals
	(12,	7)	:	0	:	0	:	None	:	FALSE	:	FALSE	:	NonNegativeReals
	(12,	8)	:	0	:	0	:	None	:	FALSE	:	FALSE	:	NonNegativeReals
	(12,	9)	:	0	:	0	:	None	:	FALSE	:	FALSE	:	NonNegativeReals
	(12,	10)	:	0	:	0	:	None	:	FALSE	:	FALSE	:	NonNegativeReals
	(12,	11)	:	0	:	0	:	None	:	FALSE	:	FALSE	:	NonNegativeReals
	(13,	1)	:	0	:	0	:	None	:	FALSE	:	FALSE	:	NonNegativeReals
	(13,	2)	:	0	:	0	:	None	:	FALSE	:	FALSE	:	NonNegativeReals
	(13,	3)	:	0	:	0	:	None	:	FALSE	:	FALSE	:	NonNegativeReals
	(13,	4)	:	0	:	0	:	None	:	FALSE	:	FALSE	:	NonNegativeReals
	(13,	5)	:	0	:	0	:	None	:	FALSE	:	FALSE	:	NonNegativeReals
	(13,	6)	:	0	:	0	:	None	:	FALSE	:	FALSE	:	NonNegativeReals
	(13,	7)	:	0	:	0	:	None	:	FALSE	:	FALSE	:	NonNegativeReals
	(13,	8)	:	0	:	0	:	None	:	FALSE	:	FALSE	:	NonNegativeReals
	(13,	9)	:	0	:	4962.2	:	None	:	FALSE	:	FALSE	:	NonNegativeReals
	(13,	10)	:	0	:	0	:	None	:	FALSE	:	FALSE	:	NonNegativeReals
	(13,	11)	:	0	:	0	:	None	:	FALSE	:	FALSE	:	NonNegativeReals
	(14,	1)	:	0	:	351	:	None	:	FALSE	:	FALSE	:	NonNegativeReals
	(14,	2)	:	0	:	0	:	None	:	FALSE	:	FALSE	:	NonNegativeReals
	(14,	3)	:	0	:	0	:	None	:	FALSE	:	FALSE	:	NonNegativeReals
	(14,	4)	:	0	:	0	:	None	:	FALSE	:	FALSE	:	NonNegativeReals
	(14,	5)	:	0	:	0	:	None	:	FALSE	:	FALSE	:	NonNegativeReals
	(14,	6)	:	0	:	0	:	None	:	FALSE	:	FALSE	:	NonNegativeReals
	(14,	7)	:	0	:	0	:	None	:	FALSE	:	FALSE	:	NonNegativeReals
	(14,	8)	:	0	:	0	:	None	:	FALSE	:	FALSE	:	NonNegativeReals
	(14,	9)	:	0	:	0	:	None	:	FALSE	:	FALSE	:	NonNegativeReals
	(14,	10)	:	0	:	0	:	None	:	FALSE	:	FALSE	:	NonNegativeReals
	(14,	11)	:	0	:	0	:	None	:	FALSE	:	FALSE	:	NonNegativeReals
	(15,	1)	:	0	:	431.622	:	None	:	FALSE	:	FALSE	:	NonNegativeReals
	(15,	2)	:	0	:	0	:	None	:	FALSE	:	FALSE	:	NonNegativeReals
	(15,	3)	:	0	:	0	:	None	:	FALSE	:	FALSE	:	NonNegativeReals
	(15,	4)	:	0	:	0	:	None	:	FALSE	:	FALSE	:	NonNegativeReals
	(15,	5)	:	0	:	0	:	None	:	FALSE	:	FALSE	:	NonNegativeReals
	(15,	6)	:	0	:	0	:	None	:	FALSE	:	FALSE	:	NonNegativeReals
	(15,	7)	:	0	:	0	:	None	:	FALSE	:	FALSE	:	NonNegativeReals
	(15,	8)	:	0	:	0	:	None	:	FALSE	:	FALSE	:	NonNegativeReals
	(15,	9)	:	0	:	0	:	None	:	FALSE	:	FALSE	:	NonNegativeReals
	(15,	10)	:	0	:	0	:	None	:	FALSE	:	FALSE	:	NonNegativeReals
	(15,	11)	:	0	:	0	:	None	:	FALSE	:	FALSE	:	NonNegativeReals
	(16,	1)	:	0	:	0	:	None	:	FALSE	:	FALSE	:	NonNegativeReals
	(16,	2)	:	0	:	0	:	None	:	FALSE	:	FALSE	:	NonNegativeReals
	(16,	3)	:	0	:	0	:	None	:	FALSE	:	FALSE	:	NonNegativeReals
	(16,	4)	:	0	:	0	:	None	:	FALSE	:	FALSE	:	NonNegativeReals
	(16,	5)	:	0	:	0	:	None	:	FALSE	:	FALSE	:	NonNegativeReals
	(16,	6)	:	0	:	0	:	None	:	FALSE	:	FALSE	:	NonNegativeReals
	(16,	7)	:	0	:	0	:	None	:	FALSE	:	FALSE	:	NonNegativeReals
	(16,	8)	:	0	:	0	:	None	:	FALSE	:	FALSE	:	NonNegativeReals
	(16,	9)	:	0	:	0	:	None	:	FALSE	:	FALSE	:	NonNegativeReals
	(16,	10)	:	0	:	0	:	None	:	FALSE	:	FALSE	:	NonNegativeReals
	(16,	11)	:	0	:	0	:	None	:	FALSE	:	FALSE	:	NonNegativeReals
	(17,	1)	:	0	:	0	:	None	:	FALSE	:	FALSE	:	NonNegativeReals
	(17,	2)	:	0	:	0	:	None	:	FALSE	:	FALSE	:	NonNegativeReals
	(17,	3)	:	0	:	0	:	None	:	FALSE	:	FALSE	:	NonNegativeReals
	(17,	4)	:	0	:	0	:	None	:	FALSE	:	FALSE	:	NonNegativeReals
	(17,	5)	:	0	:	0	:	None	:	FALSE	:	FALSE	:	NonNegativeReals
	(17,	6)	:	0	:	0	:	None	:	FALSE	:	FALSE	:	NonNegativeReals
	(17,	7)	:	0	:	0	:	None	:	FALSE	:	FALSE	:	NonNegativeReals
	(17,	8)	:	0	:	0	:	None	:	FALSE	:	FALSE	:	NonNegativeReals
	(17,	9)	:	0	:	0	:	None	:	FALSE	:	FALSE	:	NonNegativeReals
	(17,	10)	:	0	:	0	:	None	:	FALSE	:	FALSE	:	NonNegativeReals
	(17,	11)	:	0	:	0	:	None	:	FALSE	:	FALSE	:	NonNegativeReals
	(18,	1)	:	0	:	0	:	None	:	FALSE	:	FALSE	:	NonNegativeReals
	(18,	2)	:	0	:	0	:	None	:	FALSE	:	FALSE	:	NonNegativeReals
	(18,	3)	:	0	:	0	:	None	:	FALSE	:	FALSE	:	NonNegativeReals
	(18,	4)	:	0	:	0	:	None	:	FALSE	:	FALSE	:	NonNegativeReals
	(18,	5)	:	0	:	947.105	:	None	:	FALSE	:	FALSE	:	NonNegativeReals
	(18,	6)	:	0	:	0	:	None	:	FALSE	:	FALSE	:	NonNegativeReals
	(18,	7)	:	0	:	0	:	None	:	FALSE	:	FALSE	:	NonNegativeReals
	(18,	8)	:	0	:	0	:	None	:	FALSE	:	FALSE	:	NonNegativeReals
	(18,	9)	:	0	:	0	:	None	:	FALSE	:	FALSE	:	NonNegativeReals
	(18,	10)	:	0	:	0	:	None	:	FALSE	:	FALSE	:	NonNegativeReals
	(18,	11)	:	0	:	0	:	None	:	FALSE	:	FALSE	:	NonNegativeReals
	(19,	1)	:	0	:	0	:	None	:	FALSE	:	FALSE	:	NonNegativeReals
	(19,	2)	:	0	:	0	:	None	:	FALSE	:	FALSE	:	NonNegativeReals
	(19,	3)	:	0	:	0	:	None	:	FALSE	:	FALSE	:	NonNegativeReals
	(19,	4)	:	0	:	0	:	None	:	FALSE	:	FALSE	:	NonNegativeReals
	(19,	5)	:	0	:	0	:	None	:	FALSE	:	FALSE	:	NonNegativeReals
	(19,	6)	:	0	:	0	:	None	:	FALSE	:	FALSE	:	NonNegativeReals
	(19,	7)	:	0	:	0	:	None	:	FALSE	:	FALSE	:	NonNegativeReals
	(19,	8)	:	0	:	0	:	None	:	FALSE	:	FALSE	:	NonNegativeReals
	(19,	9)	:	0	:	0	:	None	:	FALSE	:	FALSE	:	NonNegativeReals
	(19,	10)	:	0	:	0	:	None	:	FALSE	:	FALSE	:	NonNegativeReals
	(19,	11)	:	0	:	0	:	None	:	FALSE	:	FALSE	:	NonNegativeReals
	(20,	1)	:	0	:	0	:	None	:	FALSE	:	FALSE	:	NonNegativeReals
	(20,	2)	:	0	:	0	:	None	:	FALSE	:	FALSE	:	NonNegativeReals
	(20,	3)	:	0	:	0	:	None	:	FALSE	:	FALSE	:	NonNegativeReals
	(20,	4)	:	0	:	0	:	None	:	FALSE	:	FALSE	:	NonNegativeReals
	(20,	5)	:	0	:	0	:	None	:	FALSE	:	FALSE	:	NonNegativeReals
	(20,	6)	:	0	:	0	:	None	:	FALSE	:	FALSE	:	NonNegativeReals
	(20,	7)	:	0	:	0	:	None	:	FALSE	:	FALSE	:	NonNegativeReals
	(20,	8)	:	0	:	0	:	None	:	FALSE	:	FALSE	:	NonNegativeReals
	(20,	9)	:	0	:	0	:	None	:	FALSE	:	FALSE	:	NonNegativeReals
	(20,	10)	:	0	:	0	:	None	:	FALSE	:	FALSE	:	NonNegativeReals
	(20,	11)	:	0	:	0	:	None	:	FALSE	:	FALSE	:	NonNegativeReals
	(21,	1)	:	0	:	0	:	None	:	FALSE	:	FALSE	:	NonNegativeReals
	(21,	2)	:	0	:	0	:	None	:	FALSE	:	FALSE	:	NonNegativeReals
	(21,	3)	:	0	:	0	:	None	:	FALSE	:	FALSE	:	NonNegativeReals
	(21,	4)	:	0	:	0	:	None	:	FALSE	:	FALSE	:	NonNegativeReals
	(21,	5)	:	0	:	0	:	None	:	FALSE	:	FALSE	:	NonNegativeReals
	(21,	6)	:	0	:	0	:	None	:	FALSE	:	FALSE	:	NonNegativeReals
	(21,	7)	:	0	:	0	:	None	:	FALSE	:	FALSE	:	NonNegativeReals
	(21,	8)	:	0	:	0	:	None	:	FALSE	:	FALSE	:	NonNegativeReals
	(21,	9)	:	0	:	0	:	None	:	FALSE	:	FALSE	:	NonNegativeReals
	(21,	10)	:	0	:	0	:	None	:	FALSE	:	FALSE	:	NonNegativeReals
	(21,	11)	:	0	:	0	:	None	:	FALSE	:	FALSE	:	NonNegativeReals
	(22,	1)	:	0	:	0	:	None	:	FALSE	:	FALSE	:	NonNegativeReals
	(22,	2)	:	0	:	0	:	None	:	FALSE	:	FALSE	:	NonNegativeReals
	(22,	3)	:	0	:	0	:	None	:	FALSE	:	FALSE	:	NonNegativeReals
	(22,	4)	:	0	:	0	:	None	:	FALSE	:	FALSE	:	NonNegativeReals
	(22,	5)	:	0	:	0	:	None	:	FALSE	:	FALSE	:	NonNegativeReals
	(22,	6)	:	0	:	0	:	None	:	FALSE	:	FALSE	:	NonNegativeReals
	(22,	7)	:	0	:	0	:	None	:	FALSE	:	FALSE	:	NonNegativeReals
	(22,	8)	:	0	:	0	:	None	:	FALSE	:	FALSE	:	NonNegativeReals
	(22,	9)	:	0	:	0	:	None	:	FALSE	:	FALSE	:	NonNegativeReals
	(22,	10)	:	0	:	0	:	None	:	FALSE	:	FALSE	:	NonNegativeReals
	(22,	11)	:	0	:	0	:	None	:	FALSE	:	FALSE	:	NonNegativeReals
	Objectives:
	obj	:	Size=1,	Index=None,	Active=True
	Key	:	Active	:	Value	profit
	None	:	TRUE	:	1.09663e+10	4.97912e+09
	Constraints:
	x_constraint	:	Size=22
	Key	:	Lower	:	Body	:	Upper
	1	:	0	:	3.81988e-11	:	0
	2	:	0	:	0	:	0
	3	:	0	:	0	:	0
	4	:	0	:	0	:	0
	5	:	0	:	0	:	0
	6	:	0	:	0	:	0
	7	:	0	:	0	:	0
	8	:	0	:	0	:	0
	9	:	0	:	0	:	0
	10	:	0	:	0	:	0
	11	:	0	:	0	:	0
	12	:	0	:	0	:	0
	13	:	0	:	0	:	0
	14	:	0	:	0	:	0
	15	:	0	:	0	:	0
	16	:	0	:	0	:	0
	17	:	0	:	0	:	0
	18	:	0	:	0	:	0
	19	:	0	:	0	:	0
	20	:	0	:	0	:	0
	21	:	0	:	0	:	0
	22	:	0	:	0	:	0
	y_constraint	:	Size=11
	Key	:	Lower	:	Body	:	Upper
	1	:	0	:	9.09495e-13	:	0
	2	:	0	:	0	:	0
	3	:	0	:	-1.33227e-15	:	0
	4	:	0	:	0	:	0
	5	:	0	:	2.84217e-13	:	0
	6	:	0	:	2.84217e-14	:	0
	7	:	0	:	6.66134e-16	:	0
	8	:	0	:	0	:	0
	9	:	0	:	-1.42109e-13	:	0
	10	:	0	:	0	:	0
	11	:	0	:	-7.10543e-15	:	0
	y_demand_constraint	:	Size=11
	Key	:	Lower	:	Body	:	Upper	percentage	profit (USD/Kiloton)	Tot profit
	1	:	None	:	2747.75	:	2747.75	1	708909	1.94791e+09
	2	:	None	:	0	:	405.55	0	1.13273e+07	0
	3	:	None	:	3.22581	:	3.22581	1	2.2307e+08	7.19581e+08
	4	:	None	:	0	:	83.901	0	2.0848e+08	0
	5	:	None	:	466.214	:	466.214	1	157500	7.34287e+07
	6	:	None	:	139.09	:	139.09	1	1292000	179704280
	7	:	None	:	0.26802	:	0.26802	1	4944370000	1.32519e+09
	8	:	None	:	0	:	1.41097	0	1.97e+07	0
	9	:	None	:	253.953	:	253.953	1	130000	33013890
	10	:	None	:	866	:	866	1	700000	606200000
	11	:	None	:	33.25	:	33.25	1	2830000	94097500
	x_fleet_constraint	:	Size=22
	Key	:	Lower	:	Body	:	Upper
	1	:	None	:	10144.2	:	10144.2
	2	:	None	:	4326.24	:	15996.7
	3	:	None	:	456.576	:	38142.4
	4	:	None	:	0	:	19071.2
	5	:	None	:	0	:	8336.86
	6	:	None	:	0	:	17385.9
	7	:	None	:	4.51864	:	2634.23
	8	:	None	:	3.80222	:	15189.6
	9	:	None	:	0	:	27000
	10	:	None	:	2333.33	:	2333.33
	11	:	None	:	0	:	17582.7
	12	:	None	:	385.5	:	385.5
	13	:	None	:	4962.2	:	11944.7
	14	:	None	:	351	:	351
	15	:	None	:	431.622	:	9236.69
	16	:	None	:	0	:	180
	17	:	None	:	0	:	3808.23
	18	:	None	:	947.105	:	947.105
	19	:	None	:	0	:	1671.17
	20	:	None	:	0	:	490.651
	21	:	None	:	0	:	900.909
	22	:	None	:	0	:	510.299

## Sheet: CN_LP_Env_FL80
Model	unknown
	Variables:
	x	:	Size=22,	Index=I
	Key	:	Lower	:	Value	:	Upper	:	Fixed	:	Stale	:	Domain
	1	:	0	:	8115.39	:	None	:	FALSE	:	FALSE	:	NonNegativeReals
	2	:	0	:	0	:	None	:	FALSE	:	FALSE	:	NonNegativeReals
	3	:	0	:	0	:	None	:	FALSE	:	FALSE	:	NonNegativeReals
	4	:	0	:	0	:	None	:	FALSE	:	FALSE	:	NonNegativeReals
	5	:	0	:	6669.48	:	None	:	FALSE	:	FALSE	:	NonNegativeReals
	6	:	0	:	0	:	None	:	FALSE	:	FALSE	:	NonNegativeReals
	7	:	0	:	5.42237	:	None	:	FALSE	:	FALSE	:	NonNegativeReals
	8	:	0	:	4.56267	:	None	:	FALSE	:	FALSE	:	NonNegativeReals
	9	:	0	:	495.635	:	None	:	FALSE	:	FALSE	:	NonNegativeReals
	10	:	0	:	1866.67	:	None	:	FALSE	:	FALSE	:	NonNegativeReals
	11	:	0	:	2795.33	:	None	:	FALSE	:	FALSE	:	NonNegativeReals
	12	:	0	:	308.4	:	None	:	FALSE	:	FALSE	:	NonNegativeReals
	13	:	0	:	0	:	None	:	FALSE	:	FALSE	:	NonNegativeReals
	14	:	0	:	280.8	:	None	:	FALSE	:	FALSE	:	NonNegativeReals
	15	:	0	:	7389.35	:	None	:	FALSE	:	FALSE	:	NonNegativeReals
	16	:	0	:	0	:	None	:	FALSE	:	FALSE	:	NonNegativeReals
	17	:	0	:	3046.58	:	None	:	FALSE	:	FALSE	:	NonNegativeReals
	18	:	0	:	757.684	:	None	:	FALSE	:	FALSE	:	NonNegativeReals
	19	:	0	:	0	:	None	:	FALSE	:	FALSE	:	NonNegativeReals
	20	:	0	:	0	:	None	:	FALSE	:	FALSE	:	NonNegativeReals
	21	:	0	:	0	:	None	:	FALSE	:	FALSE	:	NonNegativeReals
	22	:	0	:	0	:	None	:	FALSE	:	FALSE	:	NonNegativeReals
	y	:	Size=11,	Index=J
	Key	:	Lower	:	Value	:	Upper	:	Fixed	:	Stale	:	Domain
	1	:	0	:	2747.75	:	None	:	FALSE	:	FALSE	:	NonNegativeReals
	2	:	0	:	0	:	None	:	FALSE	:	FALSE	:	NonNegativeReals
	3	:	0	:	3.22581	:	None	:	FALSE	:	FALSE	:	NonNegativeReals
	4	:	0	:	0	:	None	:	FALSE	:	FALSE	:	NonNegativeReals
	5	:	0	:	466.214	:	None	:	FALSE	:	FALSE	:	NonNegativeReals
	6	:	0	:	139.09	:	None	:	FALSE	:	FALSE	:	NonNegativeReals
	7	:	0	:	0.26802	:	None	:	FALSE	:	FALSE	:	NonNegativeReals
	8	:	0	:	0	:	None	:	FALSE	:	FALSE	:	NonNegativeReals
	9	:	0	:	253.953	:	None	:	FALSE	:	FALSE	:	NonNegativeReals
	10	:	0	:	866	:	None	:	FALSE	:	FALSE	:	NonNegativeReals
	11	:	0	:	33.25	:	None	:	FALSE	:	FALSE	:	NonNegativeReals
	w	:	Size=242,	Index=I*J
	Key	:	Lower	:	Value	:	Upper	:	Fixed	:	Stale	:	Domain
	(1,	1)	:	0	:	5654.35	:	None	:	FALSE	:	FALSE	:	NonNegativeReals
	(1,	2)	:	0	:	0	:	None	:	FALSE	:	FALSE	:	NonNegativeReals
	(1,	3)	:	0	:	0	:	None	:	FALSE	:	FALSE	:	NonNegativeReals
	(1,	4)	:	0	:	0	:	None	:	FALSE	:	FALSE	:	NonNegativeReals
	(1,	5)	:	0	:	0	:	None	:	FALSE	:	FALSE	:	NonNegativeReals
	(1,	6)	:	0	:	0	:	None	:	FALSE	:	FALSE	:	NonNegativeReals
	(1,	7)	:	0	:	0	:	None	:	FALSE	:	FALSE	:	NonNegativeReals
	(1,	8)	:	0	:	0	:	None	:	FALSE	:	FALSE	:	NonNegativeReals
	(1,	9)	:	0	:	394.257	:	None	:	FALSE	:	FALSE	:	NonNegativeReals
	(1,	10)	:	0	:	2066.78	:	None	:	FALSE	:	FALSE	:	NonNegativeReals
	(1,	11)	:	0	:	0	:	None	:	FALSE	:	FALSE	:	NonNegativeReals
	(2,	1)	:	0	:	0	:	None	:	FALSE	:	FALSE	:	NonNegativeReals
	(2,	2)	:	0	:	0	:	None	:	FALSE	:	FALSE	:	NonNegativeReals
	(2,	3)	:	0	:	0	:	None	:	FALSE	:	FALSE	:	NonNegativeReals
	(2,	4)	:	0	:	0	:	None	:	FALSE	:	FALSE	:	NonNegativeReals
	(2,	5)	:	0	:	0	:	None	:	FALSE	:	FALSE	:	NonNegativeReals
	(2,	6)	:	0	:	0	:	None	:	FALSE	:	FALSE	:	NonNegativeReals
	(2,	7)	:	0	:	0	:	None	:	FALSE	:	FALSE	:	NonNegativeReals
	(2,	8)	:	0	:	0	:	None	:	FALSE	:	FALSE	:	NonNegativeReals
	(2,	9)	:	0	:	0	:	None	:	FALSE	:	FALSE	:	NonNegativeReals
	(2,	10)	:	0	:	0	:	None	:	FALSE	:	FALSE	:	NonNegativeReals
	(2,	11)	:	0	:	0	:	None	:	FALSE	:	FALSE	:	NonNegativeReals
	(3,	1)	:	0	:	0	:	None	:	FALSE	:	FALSE	:	NonNegativeReals
	(3,	2)	:	0	:	0	:	None	:	FALSE	:	FALSE	:	NonNegativeReals
	(3,	3)	:	0	:	0	:	None	:	FALSE	:	FALSE	:	NonNegativeReals
	(3,	4)	:	0	:	0	:	None	:	FALSE	:	FALSE	:	NonNegativeReals
	(3,	5)	:	0	:	0	:	None	:	FALSE	:	FALSE	:	NonNegativeReals
	(3,	6)	:	0	:	0	:	None	:	FALSE	:	FALSE	:	NonNegativeReals
	(3,	7)	:	0	:	0	:	None	:	FALSE	:	FALSE	:	NonNegativeReals
	(3,	8)	:	0	:	0	:	None	:	FALSE	:	FALSE	:	NonNegativeReals
	(3,	9)	:	0	:	0	:	None	:	FALSE	:	FALSE	:	NonNegativeReals
	(3,	10)	:	0	:	0	:	None	:	FALSE	:	FALSE	:	NonNegativeReals
	(3,	11)	:	0	:	0	:	None	:	FALSE	:	FALSE	:	NonNegativeReals
	(4,	1)	:	0	:	0	:	None	:	FALSE	:	FALSE	:	NonNegativeReals
	(4,	2)	:	0	:	0	:	None	:	FALSE	:	FALSE	:	NonNegativeReals
	(4,	3)	:	0	:	0	:	None	:	FALSE	:	FALSE	:	NonNegativeReals
	(4,	4)	:	0	:	0	:	None	:	FALSE	:	FALSE	:	NonNegativeReals
	(4,	5)	:	0	:	0	:	None	:	FALSE	:	FALSE	:	NonNegativeReals
	(4,	6)	:	0	:	0	:	None	:	FALSE	:	FALSE	:	NonNegativeReals
	(4,	7)	:	0	:	0	:	None	:	FALSE	:	FALSE	:	NonNegativeReals
	(4,	8)	:	0	:	0	:	None	:	FALSE	:	FALSE	:	NonNegativeReals
	(4,	9)	:	0	:	0	:	None	:	FALSE	:	FALSE	:	NonNegativeReals
	(4,	10)	:	0	:	0	:	None	:	FALSE	:	FALSE	:	NonNegativeReals
	(4,	11)	:	0	:	0	:	None	:	FALSE	:	FALSE	:	NonNegativeReals
	(5,	1)	:	0	:	0	:	None	:	FALSE	:	FALSE	:	NonNegativeReals
	(5,	2)	:	0	:	0	:	None	:	FALSE	:	FALSE	:	NonNegativeReals
	(5,	3)	:	0	:	0	:	None	:	FALSE	:	FALSE	:	NonNegativeReals
	(5,	4)	:	0	:	0	:	None	:	FALSE	:	FALSE	:	NonNegativeReals
	(5,	5)	:	0	:	6669.48	:	None	:	FALSE	:	FALSE	:	NonNegativeReals
	(5,	6)	:	0	:	0	:	None	:	FALSE	:	FALSE	:	NonNegativeReals
	(5,	7)	:	0	:	0	:	None	:	FALSE	:	FALSE	:	NonNegativeReals
	(5,	8)	:	0	:	0	:	None	:	FALSE	:	FALSE	:	NonNegativeReals
	(5,	9)	:	0	:	0	:	None	:	FALSE	:	FALSE	:	NonNegativeReals
	(5,	10)	:	0	:	0	:	None	:	FALSE	:	FALSE	:	NonNegativeReals
	(5,	11)	:	0	:	0	:	None	:	FALSE	:	FALSE	:	NonNegativeReals
	(6,	1)	:	0	:	0	:	None	:	FALSE	:	FALSE	:	NonNegativeReals
	(6,	2)	:	0	:	0	:	None	:	FALSE	:	FALSE	:	NonNegativeReals
	(6,	3)	:	0	:	0	:	None	:	FALSE	:	FALSE	:	NonNegativeReals
	(6,	4)	:	0	:	0	:	None	:	FALSE	:	FALSE	:	NonNegativeReals
	(6,	5)	:	0	:	0	:	None	:	FALSE	:	FALSE	:	NonNegativeReals
	(6,	6)	:	0	:	0	:	None	:	FALSE	:	FALSE	:	NonNegativeReals
	(6,	7)	:	0	:	0	:	None	:	FALSE	:	FALSE	:	NonNegativeReals
	(6,	8)	:	0	:	0	:	None	:	FALSE	:	FALSE	:	NonNegativeReals
	(6,	9)	:	0	:	0	:	None	:	FALSE	:	FALSE	:	NonNegativeReals
	(6,	10)	:	0	:	0	:	None	:	FALSE	:	FALSE	:	NonNegativeReals
	(6,	11)	:	0	:	0	:	None	:	FALSE	:	FALSE	:	NonNegativeReals
	(7,	1)	:	0	:	0	:	None	:	FALSE	:	FALSE	:	NonNegativeReals
	(7,	2)	:	0	:	0	:	None	:	FALSE	:	FALSE	:	NonNegativeReals
	(7,	3)	:	0	:	0	:	None	:	FALSE	:	FALSE	:	NonNegativeReals
	(7,	4)	:	0	:	0	:	None	:	FALSE	:	FALSE	:	NonNegativeReals
	(7,	5)	:	0	:	0	:	None	:	FALSE	:	FALSE	:	NonNegativeReals
	(7,	6)	:	0	:	0	:	None	:	FALSE	:	FALSE	:	NonNegativeReals
	(7,	7)	:	0	:	5.42237	:	None	:	FALSE	:	FALSE	:	NonNegativeReals
	(7,	8)	:	0	:	0	:	None	:	FALSE	:	FALSE	:	NonNegativeReals
	(7,	9)	:	0	:	0	:	None	:	FALSE	:	FALSE	:	NonNegativeReals
	(7,	10)	:	0	:	0	:	None	:	FALSE	:	FALSE	:	NonNegativeReals
	(7,	11)	:	0	:	0	:	None	:	FALSE	:	FALSE	:	NonNegativeReals
	(8,	1)	:	0	:	0	:	None	:	FALSE	:	FALSE	:	NonNegativeReals
	(8,	2)	:	0	:	0	:	None	:	FALSE	:	FALSE	:	NonNegativeReals
	(8,	3)	:	0	:	4.56267	:	None	:	FALSE	:	FALSE	:	NonNegativeReals
	(8,	4)	:	0	:	0	:	None	:	FALSE	:	FALSE	:	NonNegativeReals
	(8,	5)	:	0	:	0	:	None	:	FALSE	:	FALSE	:	NonNegativeReals
	(8,	6)	:	0	:	0	:	None	:	FALSE	:	FALSE	:	NonNegativeReals
	(8,	7)	:	0	:	0	:	None	:	FALSE	:	FALSE	:	NonNegativeReals
	(8,	8)	:	0	:	0	:	None	:	FALSE	:	FALSE	:	NonNegativeReals
	(8,	9)	:	0	:	0	:	None	:	FALSE	:	FALSE	:	NonNegativeReals
	(8,	10)	:	0	:	0	:	None	:	FALSE	:	FALSE	:	NonNegativeReals
	(8,	11)	:	0	:	0	:	None	:	FALSE	:	FALSE	:	NonNegativeReals
	(9,	1)	:	0	:	0	:	None	:	FALSE	:	FALSE	:	NonNegativeReals
	(9,	2)	:	0	:	0	:	None	:	FALSE	:	FALSE	:	NonNegativeReals
	(9,	3)	:	0	:	0	:	None	:	FALSE	:	FALSE	:	NonNegativeReals
	(9,	4)	:	0	:	0	:	None	:	FALSE	:	FALSE	:	NonNegativeReals
	(9,	5)	:	0	:	0	:	None	:	FALSE	:	FALSE	:	NonNegativeReals
	(9,	6)	:	0	:	0	:	None	:	FALSE	:	FALSE	:	NonNegativeReals
	(9,	7)	:	0	:	0	:	None	:	FALSE	:	FALSE	:	NonNegativeReals
	(9,	8)	:	0	:	0	:	None	:	FALSE	:	FALSE	:	NonNegativeReals
	(9,	9)	:	0	:	0	:	None	:	FALSE	:	FALSE	:	NonNegativeReals
	(9,	10)	:	0	:	0	:	None	:	FALSE	:	FALSE	:	NonNegativeReals
	(9,	11)	:	0	:	495.635	:	None	:	FALSE	:	FALSE	:	NonNegativeReals
	(10,	1)	:	0	:	0	:	None	:	FALSE	:	FALSE	:	NonNegativeReals
	(10,	2)	:	0	:	0	:	None	:	FALSE	:	FALSE	:	NonNegativeReals
	(10,	3)	:	0	:	0	:	None	:	FALSE	:	FALSE	:	NonNegativeReals
	(10,	4)	:	0	:	0	:	None	:	FALSE	:	FALSE	:	NonNegativeReals
	(10,	5)	:	0	:	1866.67	:	None	:	FALSE	:	FALSE	:	NonNegativeReals
	(10,	6)	:	0	:	0	:	None	:	FALSE	:	FALSE	:	NonNegativeReals
	(10,	7)	:	0	:	0	:	None	:	FALSE	:	FALSE	:	NonNegativeReals
	(10,	8)	:	0	:	0	:	None	:	FALSE	:	FALSE	:	NonNegativeReals
	(10,	9)	:	0	:	0	:	None	:	FALSE	:	FALSE	:	NonNegativeReals
	(10,	10)	:	0	:	0	:	None	:	FALSE	:	FALSE	:	NonNegativeReals
	(10,	11)	:	0	:	0	:	None	:	FALSE	:	FALSE	:	NonNegativeReals
	(11,	1)	:	0	:	57.737	:	None	:	FALSE	:	FALSE	:	NonNegativeReals
	(11,	2)	:	0	:	0	:	None	:	FALSE	:	FALSE	:	NonNegativeReals
	(11,	3)	:	0	:	0	:	None	:	FALSE	:	FALSE	:	NonNegativeReals
	(11,	4)	:	0	:	0	:	None	:	FALSE	:	FALSE	:	NonNegativeReals
	(11,	5)	:	0	:	1623.93	:	None	:	FALSE	:	FALSE	:	NonNegativeReals
	(11,	6)	:	0	:	1113.66	:	None	:	FALSE	:	FALSE	:	NonNegativeReals
	(11,	7)	:	0	:	0	:	None	:	FALSE	:	FALSE	:	NonNegativeReals
	(11,	8)	:	0	:	0	:	None	:	FALSE	:	FALSE	:	NonNegativeReals
	(11,	9)	:	0	:	0	:	None	:	FALSE	:	FALSE	:	NonNegativeReals
	(11,	10)	:	0	:	0	:	None	:	FALSE	:	FALSE	:	NonNegativeReals
	(11,	11)	:	0	:	0	:	None	:	FALSE	:	FALSE	:	NonNegativeReals
	(12,	1)	:	0	:	308.4	:	None	:	FALSE	:	FALSE	:	NonNegativeReals
	(12,	2)	:	0	:	0	:	None	:	FALSE	:	FALSE	:	NonNegativeReals
	(12,	3)	:	0	:	0	:	None	:	FALSE	:	FALSE	:	NonNegativeReals
	(12,	4)	:	0	:	0	:	None	:	FALSE	:	FALSE	:	NonNegativeReals
	(12,	5)	:	0	:	0	:	None	:	FALSE	:	FALSE	:	NonNegativeReals
	(12,	6)	:	0	:	0	:	None	:	FALSE	:	FALSE	:	NonNegativeReals
	(12,	7)	:	0	:	0	:	None	:	FALSE	:	FALSE	:	NonNegativeReals
	(12,	8)	:	0	:	0	:	None	:	FALSE	:	FALSE	:	NonNegativeReals
	(12,	9)	:	0	:	0	:	None	:	FALSE	:	FALSE	:	NonNegativeReals
	(12,	10)	:	0	:	0	:	None	:	FALSE	:	FALSE	:	NonNegativeReals
	(12,	11)	:	0	:	0	:	None	:	FALSE	:	FALSE	:	NonNegativeReals
	(13,	1)	:	0	:	0	:	None	:	FALSE	:	FALSE	:	NonNegativeReals
	(13,	2)	:	0	:	0	:	None	:	FALSE	:	FALSE	:	NonNegativeReals
	(13,	3)	:	0	:	0	:	None	:	FALSE	:	FALSE	:	NonNegativeReals
	(13,	4)	:	0	:	0	:	None	:	FALSE	:	FALSE	:	NonNegativeReals
	(13,	5)	:	0	:	0	:	None	:	FALSE	:	FALSE	:	NonNegativeReals
	(13,	6)	:	0	:	0	:	None	:	FALSE	:	FALSE	:	NonNegativeReals
	(13,	7)	:	0	:	0	:	None	:	FALSE	:	FALSE	:	NonNegativeReals
	(13,	8)	:	0	:	0	:	None	:	FALSE	:	FALSE	:	NonNegativeReals
	(13,	9)	:	0	:	0	:	None	:	FALSE	:	FALSE	:	NonNegativeReals
	(13,	10)	:	0	:	0	:	None	:	FALSE	:	FALSE	:	NonNegativeReals
	(13,	11)	:	0	:	0	:	None	:	FALSE	:	FALSE	:	NonNegativeReals
	(14,	1)	:	0	:	280.8	:	None	:	FALSE	:	FALSE	:	NonNegativeReals
	(14,	2)	:	0	:	0	:	None	:	FALSE	:	FALSE	:	NonNegativeReals
	(14,	3)	:	0	:	0	:	None	:	FALSE	:	FALSE	:	NonNegativeReals
	(14,	4)	:	0	:	0	:	None	:	FALSE	:	FALSE	:	NonNegativeReals
	(14,	5)	:	0	:	0	:	None	:	FALSE	:	FALSE	:	NonNegativeReals
	(14,	6)	:	0	:	0	:	None	:	FALSE	:	FALSE	:	NonNegativeReals
	(14,	7)	:	0	:	0	:	None	:	FALSE	:	FALSE	:	NonNegativeReals
	(14,	8)	:	0	:	0	:	None	:	FALSE	:	FALSE	:	NonNegativeReals
	(14,	9)	:	0	:	0	:	None	:	FALSE	:	FALSE	:	NonNegativeReals
	(14,	10)	:	0	:	0	:	None	:	FALSE	:	FALSE	:	NonNegativeReals
	(14,	11)	:	0	:	0	:	None	:	FALSE	:	FALSE	:	NonNegativeReals
	(15,	1)	:	0	:	7389.35	:	None	:	FALSE	:	FALSE	:	NonNegativeReals
	(15,	2)	:	0	:	0	:	None	:	FALSE	:	FALSE	:	NonNegativeReals
	(15,	3)	:	0	:	0	:	None	:	FALSE	:	FALSE	:	NonNegativeReals
	(15,	4)	:	0	:	0	:	None	:	FALSE	:	FALSE	:	NonNegativeReals
	(15,	5)	:	0	:	0	:	None	:	FALSE	:	FALSE	:	NonNegativeReals
	(15,	6)	:	0	:	0	:	None	:	FALSE	:	FALSE	:	NonNegativeReals
	(15,	7)	:	0	:	0	:	None	:	FALSE	:	FALSE	:	NonNegativeReals
	(15,	8)	:	0	:	0	:	None	:	FALSE	:	FALSE	:	NonNegativeReals
	(15,	9)	:	0	:	0	:	None	:	FALSE	:	FALSE	:	NonNegativeReals
	(15,	10)	:	0	:	0	:	None	:	FALSE	:	FALSE	:	NonNegativeReals
	(15,	11)	:	0	:	0	:	None	:	FALSE	:	FALSE	:	NonNegativeReals
	(16,	1)	:	0	:	0	:	None	:	FALSE	:	FALSE	:	NonNegativeReals
	(16,	2)	:	0	:	0	:	None	:	FALSE	:	FALSE	:	NonNegativeReals
	(16,	3)	:	0	:	0	:	None	:	FALSE	:	FALSE	:	NonNegativeReals
	(16,	4)	:	0	:	0	:	None	:	FALSE	:	FALSE	:	NonNegativeReals
	(16,	5)	:	0	:	0	:	None	:	FALSE	:	FALSE	:	NonNegativeReals
	(16,	6)	:	0	:	0	:	None	:	FALSE	:	FALSE	:	NonNegativeReals
	(16,	7)	:	0	:	0	:	None	:	FALSE	:	FALSE	:	NonNegativeReals
	(16,	8)	:	0	:	0	:	None	:	FALSE	:	FALSE	:	NonNegativeReals
	(16,	9)	:	0	:	0	:	None	:	FALSE	:	FALSE	:	NonNegativeReals
	(16,	10)	:	0	:	0	:	None	:	FALSE	:	FALSE	:	NonNegativeReals
	(16,	11)	:	0	:	0	:	None	:	FALSE	:	FALSE	:	NonNegativeReals
	(17,	1)	:	0	:	3046.58	:	None	:	FALSE	:	FALSE	:	NonNegativeReals
	(17,	2)	:	0	:	0	:	None	:	FALSE	:	FALSE	:	NonNegativeReals
	(17,	3)	:	0	:	0	:	None	:	FALSE	:	FALSE	:	NonNegativeReals
	(17,	4)	:	0	:	0	:	None	:	FALSE	:	FALSE	:	NonNegativeReals
	(17,	5)	:	0	:	0	:	None	:	FALSE	:	FALSE	:	NonNegativeReals
	(17,	6)	:	0	:	0	:	None	:	FALSE	:	FALSE	:	NonNegativeReals
	(17,	7)	:	0	:	0	:	None	:	FALSE	:	FALSE	:	NonNegativeReals
	(17,	8)	:	0	:	0	:	None	:	FALSE	:	FALSE	:	NonNegativeReals
	(17,	9)	:	0	:	0	:	None	:	FALSE	:	FALSE	:	NonNegativeReals
	(17,	10)	:	0	:	0	:	None	:	FALSE	:	FALSE	:	NonNegativeReals
	(17,	11)	:	0	:	0	:	None	:	FALSE	:	FALSE	:	NonNegativeReals
	(18,	1)	:	0	:	757.684	:	None	:	FALSE	:	FALSE	:	NonNegativeReals
	(18,	2)	:	0	:	0	:	None	:	FALSE	:	FALSE	:	NonNegativeReals
	(18,	3)	:	0	:	0	:	None	:	FALSE	:	FALSE	:	NonNegativeReals
	(18,	4)	:	0	:	0	:	None	:	FALSE	:	FALSE	:	NonNegativeReals
	(18,	5)	:	0	:	0	:	None	:	FALSE	:	FALSE	:	NonNegativeReals
	(18,	6)	:	0	:	0	:	None	:	FALSE	:	FALSE	:	NonNegativeReals
	(18,	7)	:	0	:	0	:	None	:	FALSE	:	FALSE	:	NonNegativeReals
	(18,	8)	:	0	:	0	:	None	:	FALSE	:	FALSE	:	NonNegativeReals
	(18,	9)	:	0	:	0	:	None	:	FALSE	:	FALSE	:	NonNegativeReals
	(18,	10)	:	0	:	0	:	None	:	FALSE	:	FALSE	:	NonNegativeReals
	(18,	11)	:	0	:	0	:	None	:	FALSE	:	FALSE	:	NonNegativeReals
	(19,	1)	:	0	:	0	:	None	:	FALSE	:	FALSE	:	NonNegativeReals
	(19,	2)	:	0	:	0	:	None	:	FALSE	:	FALSE	:	NonNegativeReals
	(19,	3)	:	0	:	0	:	None	:	FALSE	:	FALSE	:	NonNegativeReals
	(19,	4)	:	0	:	0	:	None	:	FALSE	:	FALSE	:	NonNegativeReals
	(19,	5)	:	0	:	0	:	None	:	FALSE	:	FALSE	:	NonNegativeReals
	(19,	6)	:	0	:	0	:	None	:	FALSE	:	FALSE	:	NonNegativeReals
	(19,	7)	:	0	:	0	:	None	:	FALSE	:	FALSE	:	NonNegativeReals
	(19,	8)	:	0	:	0	:	None	:	FALSE	:	FALSE	:	NonNegativeReals
	(19,	9)	:	0	:	0	:	None	:	FALSE	:	FALSE	:	NonNegativeReals
	(19,	10)	:	0	:	0	:	None	:	FALSE	:	FALSE	:	NonNegativeReals
	(19,	11)	:	0	:	0	:	None	:	FALSE	:	FALSE	:	NonNegativeReals
	(20,	1)	:	0	:	0	:	None	:	FALSE	:	FALSE	:	NonNegativeReals
	(20,	2)	:	0	:	0	:	None	:	FALSE	:	FALSE	:	NonNegativeReals
	(20,	3)	:	0	:	0	:	None	:	FALSE	:	FALSE	:	NonNegativeReals
	(20,	4)	:	0	:	0	:	None	:	FALSE	:	FALSE	:	NonNegativeReals
	(20,	5)	:	0	:	0	:	None	:	FALSE	:	FALSE	:	NonNegativeReals
	(20,	6)	:	0	:	0	:	None	:	FALSE	:	FALSE	:	NonNegativeReals
	(20,	7)	:	0	:	0	:	None	:	FALSE	:	FALSE	:	NonNegativeReals
	(20,	8)	:	0	:	0	:	None	:	FALSE	:	FALSE	:	NonNegativeReals
	(20,	9)	:	0	:	0	:	None	:	FALSE	:	FALSE	:	NonNegativeReals
	(20,	10)	:	0	:	0	:	None	:	FALSE	:	FALSE	:	NonNegativeReals
	(20,	11)	:	0	:	0	:	None	:	FALSE	:	FALSE	:	NonNegativeReals
	(21,	1)	:	0	:	0	:	None	:	FALSE	:	FALSE	:	NonNegativeReals
	(21,	2)	:	0	:	0	:	None	:	FALSE	:	FALSE	:	NonNegativeReals
	(21,	3)	:	0	:	0	:	None	:	FALSE	:	FALSE	:	NonNegativeReals
	(21,	4)	:	0	:	0	:	None	:	FALSE	:	FALSE	:	NonNegativeReals
	(21,	5)	:	0	:	0	:	None	:	FALSE	:	FALSE	:	NonNegativeReals
	(21,	6)	:	0	:	0	:	None	:	FALSE	:	FALSE	:	NonNegativeReals
	(21,	7)	:	0	:	0	:	None	:	FALSE	:	FALSE	:	NonNegativeReals
	(21,	8)	:	0	:	0	:	None	:	FALSE	:	FALSE	:	NonNegativeReals
	(21,	9)	:	0	:	0	:	None	:	FALSE	:	FALSE	:	NonNegativeReals
	(21,	10)	:	0	:	0	:	None	:	FALSE	:	FALSE	:	NonNegativeReals
	(21,	11)	:	0	:	0	:	None	:	FALSE	:	FALSE	:	NonNegativeReals
	(22,	1)	:	0	:	0	:	None	:	FALSE	:	FALSE	:	NonNegativeReals
	(22,	2)	:	0	:	0	:	None	:	FALSE	:	FALSE	:	NonNegativeReals
	(22,	3)	:	0	:	0	:	None	:	FALSE	:	FALSE	:	NonNegativeReals
	(22,	4)	:	0	:	0	:	None	:	FALSE	:	FALSE	:	NonNegativeReals
	(22,	5)	:	0	:	0	:	None	:	FALSE	:	FALSE	:	NonNegativeReals
	(22,	6)	:	0	:	0	:	None	:	FALSE	:	FALSE	:	NonNegativeReals
	(22,	7)	:	0	:	0	:	None	:	FALSE	:	FALSE	:	NonNegativeReals
	(22,	8)	:	0	:	0	:	None	:	FALSE	:	FALSE	:	NonNegativeReals
	(22,	9)	:	0	:	0	:	None	:	FALSE	:	FALSE	:	NonNegativeReals
	(22,	10)	:	0	:	0	:	None	:	FALSE	:	FALSE	:	NonNegativeReals
	(22,	11)	:	0	:	0	:	None	:	FALSE	:	FALSE	:	NonNegativeReals
	Objectives:
	obj	:	Size=1,	Index=None,	Active=True
	Key	:	Active	:	Value	profit
	None	:	TRUE	:	1.09663e+10	4.97912e+09
	Constraints:
	x_constraint	:	Size=22
	Key	:	Lower	:	Body	:	Upper
	1	:	0	:	3.63798e-12	:	0
	2	:	0	:	0	:	0
	3	:	0	:	0	:	0
	4	:	0	:	0	:	0
	5	:	0	:	0	:	0
	6	:	0	:	0	:	0
	7	:	0	:	0	:	0
	8	:	0	:	0	:	0
	9	:	0	:	0	:	0
	10	:	0	:	0	:	0
	11	:	0	:	-7.27596e-12	:	0
	12	:	0	:	0	:	0
	13	:	0	:	0	:	0
	14	:	0	:	0	:	0
	15	:	0	:	0	:	0
	16	:	0	:	0	:	0
	17	:	0	:	0	:	0
	18	:	0	:	0	:	0
	19	:	0	:	0	:	0
	20	:	0	:	0	:	0
	21	:	0	:	0	:	0
	22	:	0	:	0	:	0
	y_constraint	:	Size=11
	Key	:	Lower	:	Body	:	Upper
	1	:	0	:	0	:	0
	2	:	0	:	0	:	0
	3	:	0	:	-3.9968e-15	:	0
	4	:	0	:	0	:	0
	5	:	0	:	-2.27374e-13	:	0
	6	:	0	:	-2.84217e-14	:	0
	7	:	0	:	-6.66134e-16	:	0
	8	:	0	:	0	:	0
	9	:	0	:	-2.55795e-13	:	0
	10	:	0	:	1.7053e-12	:	0
	11	:	0	:	-7.10543e-15	:	0
	y_demand_constraint	:	Size=11
	Key	:	Lower	:	Body	:	Upper	percentage	profit (USD/Kiloton)	Tot profit
	1	:	None	:	2747.75	:	2747.75	1	708909	1.94791e+09
	2	:	None	:	0	:	405.55	0	1.13273e+07	0
	3	:	None	:	3.22581	:	3.22581	1	2.2307e+08	7.19581e+08
	4	:	None	:	0	:	83.901	0	2.0848e+08	0
	5	:	None	:	466.214	:	466.214	1	157500	7.34287e+07
	6	:	None	:	139.09	:	139.09	1	1292000	179704280
	7	:	None	:	0.26802	:	0.26802	1	4944370000	1.32519e+09
	8	:	None	:	0	:	1.41097	0	1.97e+07	0
	9	:	None	:	253.953	:	253.953	1	130000	33013890
	10	:	None	:	866	:	866	1	700000	606200000
	11	:	None	:	33.25	:	33.25	1	2830000	94097500
	x_fleet_constraint	:	Size=22
	Key	:	Lower	:	Body	:	Upper
	1	:	None	:	8115.39	:	8115.39
	2	:	None	:	0	:	12797.3
	3	:	None	:	0	:	30514
	4	:	None	:	0	:	15257
	5	:	None	:	6669.48	:	6669.48
	6	:	None	:	0	:	13908.7
	7	:	None	:	5.42237	:	2107.39
	8	:	None	:	4.56267	:	12151.7
	9	:	None	:	495.635	:	21600
	10	:	None	:	1866.67	:	1866.67
	11	:	None	:	2795.33	:	14066.1
	12	:	None	:	308.4	:	308.4
	13	:	None	:	0	:	9555.73
	14	:	None	:	280.8	:	280.8
	15	:	None	:	7389.35	:	7389.35
	16	:	None	:	0	:	144
	17	:	None	:	3046.58	:	3046.58
	18	:	None	:	757.684	:	757.684
	19	:	None	:	0	:	1336.93
	20	:	None	:	0	:	392.521
	21	:	None	:	0	:	720.727
	22	:	None	:	0	:	408.239

## Sheet: CN_LP_Env_FL120
Model	unknown
	Variables:
	x	:	Size=22,	Index=I
	Key	:	Lower	:	Value	:	Upper	:	Fixed	:	Stale	:	Domain
	1	:	0	:	6067.94	:	None	:	FALSE	:	FALSE	:	NonNegativeReals
	2	:	0	:	0	:	None	:	FALSE	:	FALSE	:	NonNegativeReals
	3	:	0	:	0	:	None	:	FALSE	:	FALSE	:	NonNegativeReals
	4	:	0	:	0	:	None	:	FALSE	:	FALSE	:	NonNegativeReals
	5	:	0	:	7749.54	:	None	:	FALSE	:	FALSE	:	NonNegativeReals
	6	:	0	:	0	:	None	:	FALSE	:	FALSE	:	NonNegativeReals
	7	:	0	:	5.42237	:	None	:	FALSE	:	FALSE	:	NonNegativeReals
	8	:	0	:	4.56267	:	None	:	FALSE	:	FALSE	:	NonNegativeReals
	9	:	0	:	495.635	:	None	:	FALSE	:	FALSE	:	NonNegativeReals
	10	:	0	:	0	:	None	:	FALSE	:	FALSE	:	NonNegativeReals
	11	:	0	:	1113.66	:	None	:	FALSE	:	FALSE	:	NonNegativeReals
	12	:	0	:	462.6	:	None	:	FALSE	:	FALSE	:	NonNegativeReals
	13	:	0	:	0	:	None	:	FALSE	:	FALSE	:	NonNegativeReals
	14	:	0	:	0	:	None	:	FALSE	:	FALSE	:	NonNegativeReals
	15	:	0	:	11084	:	None	:	FALSE	:	FALSE	:	NonNegativeReals
	16	:	0	:	0	:	None	:	FALSE	:	FALSE	:	NonNegativeReals
	17	:	0	:	4569.87	:	None	:	FALSE	:	FALSE	:	NonNegativeReals
	18	:	0	:	1136.53	:	None	:	FALSE	:	FALSE	:	NonNegativeReals
	19	:	0	:	0	:	None	:	FALSE	:	FALSE	:	NonNegativeReals
	20	:	0	:	0	:	None	:	FALSE	:	FALSE	:	NonNegativeReals
	21	:	0	:	0	:	None	:	FALSE	:	FALSE	:	NonNegativeReals
	22	:	0	:	0	:	None	:	FALSE	:	FALSE	:	NonNegativeReals
	y	:	Size=11,	Index=J
	Key	:	Lower	:	Value	:	Upper	:	Fixed	:	Stale	:	Domain
	1	:	0	:	2747.75	:	None	:	FALSE	:	FALSE	:	NonNegativeReals
	2	:	0	:	0	:	None	:	FALSE	:	FALSE	:	NonNegativeReals
	3	:	0	:	3.22581	:	None	:	FALSE	:	FALSE	:	NonNegativeReals
	4	:	0	:	0	:	None	:	FALSE	:	FALSE	:	NonNegativeReals
	5	:	0	:	466.214	:	None	:	FALSE	:	FALSE	:	NonNegativeReals
	6	:	0	:	139.09	:	None	:	FALSE	:	FALSE	:	NonNegativeReals
	7	:	0	:	0.26802	:	None	:	FALSE	:	FALSE	:	NonNegativeReals
	8	:	0	:	0	:	None	:	FALSE	:	FALSE	:	NonNegativeReals
	9	:	0	:	253.953	:	None	:	FALSE	:	FALSE	:	NonNegativeReals
	10	:	0	:	866	:	None	:	FALSE	:	FALSE	:	NonNegativeReals
	11	:	0	:	33.25	:	None	:	FALSE	:	FALSE	:	NonNegativeReals
	w	:	Size=242,	Index=I*J
	Key	:	Lower	:	Value	:	Upper	:	Fixed	:	Stale	:	Domain
	(1,	1)	:	0	:	3606.91	:	None	:	FALSE	:	FALSE	:	NonNegativeReals
	(1,	2)	:	0	:	0	:	None	:	FALSE	:	FALSE	:	NonNegativeReals
	(1,	3)	:	0	:	0	:	None	:	FALSE	:	FALSE	:	NonNegativeReals
	(1,	4)	:	0	:	0	:	None	:	FALSE	:	FALSE	:	NonNegativeReals
	(1,	5)	:	0	:	0	:	None	:	FALSE	:	FALSE	:	NonNegativeReals
	(1,	6)	:	0	:	0	:	None	:	FALSE	:	FALSE	:	NonNegativeReals
	(1,	7)	:	0	:	0	:	None	:	FALSE	:	FALSE	:	NonNegativeReals
	(1,	8)	:	0	:	0	:	None	:	FALSE	:	FALSE	:	NonNegativeReals
	(1,	9)	:	0	:	394.257	:	None	:	FALSE	:	FALSE	:	NonNegativeReals
	(1,	10)	:	0	:	2066.78	:	None	:	FALSE	:	FALSE	:	NonNegativeReals
	(1,	11)	:	0	:	0	:	None	:	FALSE	:	FALSE	:	NonNegativeReals
	(2,	1)	:	0	:	0	:	None	:	FALSE	:	FALSE	:	NonNegativeReals
	(2,	2)	:	0	:	0	:	None	:	FALSE	:	FALSE	:	NonNegativeReals
	(2,	3)	:	0	:	0	:	None	:	FALSE	:	FALSE	:	NonNegativeReals
	(2,	4)	:	0	:	0	:	None	:	FALSE	:	FALSE	:	NonNegativeReals
	(2,	5)	:	0	:	0	:	None	:	FALSE	:	FALSE	:	NonNegativeReals
	(2,	6)	:	0	:	0	:	None	:	FALSE	:	FALSE	:	NonNegativeReals
	(2,	7)	:	0	:	0	:	None	:	FALSE	:	FALSE	:	NonNegativeReals
	(2,	8)	:	0	:	0	:	None	:	FALSE	:	FALSE	:	NonNegativeReals
	(2,	9)	:	0	:	0	:	None	:	FALSE	:	FALSE	:	NonNegativeReals
	(2,	10)	:	0	:	0	:	None	:	FALSE	:	FALSE	:	NonNegativeReals
	(2,	11)	:	0	:	0	:	None	:	FALSE	:	FALSE	:	NonNegativeReals
	(3,	1)	:	0	:	0	:	None	:	FALSE	:	FALSE	:	NonNegativeReals
	(3,	2)	:	0	:	0	:	None	:	FALSE	:	FALSE	:	NonNegativeReals
	(3,	3)	:	0	:	0	:	None	:	FALSE	:	FALSE	:	NonNegativeReals
	(3,	4)	:	0	:	0	:	None	:	FALSE	:	FALSE	:	NonNegativeReals
	(3,	5)	:	0	:	0	:	None	:	FALSE	:	FALSE	:	NonNegativeReals
	(3,	6)	:	0	:	0	:	None	:	FALSE	:	FALSE	:	NonNegativeReals
	(3,	7)	:	0	:	0	:	None	:	FALSE	:	FALSE	:	NonNegativeReals
	(3,	8)	:	0	:	0	:	None	:	FALSE	:	FALSE	:	NonNegativeReals
	(3,	9)	:	0	:	0	:	None	:	FALSE	:	FALSE	:	NonNegativeReals
	(3,	10)	:	0	:	0	:	None	:	FALSE	:	FALSE	:	NonNegativeReals
	(3,	11)	:	0	:	0	:	None	:	FALSE	:	FALSE	:	NonNegativeReals
	(4,	1)	:	0	:	0	:	None	:	FALSE	:	FALSE	:	NonNegativeReals
	(4,	2)	:	0	:	0	:	None	:	FALSE	:	FALSE	:	NonNegativeReals
	(4,	3)	:	0	:	0	:	None	:	FALSE	:	FALSE	:	NonNegativeReals
	(4,	4)	:	0	:	0	:	None	:	FALSE	:	FALSE	:	NonNegativeReals
	(4,	5)	:	0	:	0	:	None	:	FALSE	:	FALSE	:	NonNegativeReals
	(4,	6)	:	0	:	0	:	None	:	FALSE	:	FALSE	:	NonNegativeReals
	(4,	7)	:	0	:	0	:	None	:	FALSE	:	FALSE	:	NonNegativeReals
	(4,	8)	:	0	:	0	:	None	:	FALSE	:	FALSE	:	NonNegativeReals
	(4,	9)	:	0	:	0	:	None	:	FALSE	:	FALSE	:	NonNegativeReals
	(4,	10)	:	0	:	0	:	None	:	FALSE	:	FALSE	:	NonNegativeReals
	(4,	11)	:	0	:	0	:	None	:	FALSE	:	FALSE	:	NonNegativeReals
	(5,	1)	:	0	:	0	:	None	:	FALSE	:	FALSE	:	NonNegativeReals
	(5,	2)	:	0	:	0	:	None	:	FALSE	:	FALSE	:	NonNegativeReals
	(5,	3)	:	0	:	0	:	None	:	FALSE	:	FALSE	:	NonNegativeReals
	(5,	4)	:	0	:	0	:	None	:	FALSE	:	FALSE	:	NonNegativeReals
	(5,	5)	:	0	:	7749.54	:	None	:	FALSE	:	FALSE	:	NonNegativeReals
	(5,	6)	:	0	:	0	:	None	:	FALSE	:	FALSE	:	NonNegativeReals
	(5,	7)	:	0	:	0	:	None	:	FALSE	:	FALSE	:	NonNegativeReals
	(5,	8)	:	0	:	0	:	None	:	FALSE	:	FALSE	:	NonNegativeReals
	(5,	9)	:	0	:	0	:	None	:	FALSE	:	FALSE	:	NonNegativeReals
	(5,	10)	:	0	:	0	:	None	:	FALSE	:	FALSE	:	NonNegativeReals
	(5,	11)	:	0	:	0	:	None	:	FALSE	:	FALSE	:	NonNegativeReals
	(6,	1)	:	0	:	0	:	None	:	FALSE	:	FALSE	:	NonNegativeReals
	(6,	2)	:	0	:	0	:	None	:	FALSE	:	FALSE	:	NonNegativeReals
	(6,	3)	:	0	:	0	:	None	:	FALSE	:	FALSE	:	NonNegativeReals
	(6,	4)	:	0	:	0	:	None	:	FALSE	:	FALSE	:	NonNegativeReals
	(6,	5)	:	0	:	0	:	None	:	FALSE	:	FALSE	:	NonNegativeReals
	(6,	6)	:	0	:	0	:	None	:	FALSE	:	FALSE	:	NonNegativeReals
	(6,	7)	:	0	:	0	:	None	:	FALSE	:	FALSE	:	NonNegativeReals
	(6,	8)	:	0	:	0	:	None	:	FALSE	:	FALSE	:	NonNegativeReals
	(6,	9)	:	0	:	0	:	None	:	FALSE	:	FALSE	:	NonNegativeReals
	(6,	10)	:	0	:	0	:	None	:	FALSE	:	FALSE	:	NonNegativeReals
	(6,	11)	:	0	:	0	:	None	:	FALSE	:	FALSE	:	NonNegativeReals
	(7,	1)	:	0	:	0	:	None	:	FALSE	:	FALSE	:	NonNegativeReals
	(7,	2)	:	0	:	0	:	None	:	FALSE	:	FALSE	:	NonNegativeReals
	(7,	3)	:	0	:	0	:	None	:	FALSE	:	FALSE	:	NonNegativeReals
	(7,	4)	:	0	:	0	:	None	:	FALSE	:	FALSE	:	NonNegativeReals
	(7,	5)	:	0	:	0	:	None	:	FALSE	:	FALSE	:	NonNegativeReals
	(7,	6)	:	0	:	0	:	None	:	FALSE	:	FALSE	:	NonNegativeReals
	(7,	7)	:	0	:	5.42237	:	None	:	FALSE	:	FALSE	:	NonNegativeReals
	(7,	8)	:	0	:	0	:	None	:	FALSE	:	FALSE	:	NonNegativeReals
	(7,	9)	:	0	:	0	:	None	:	FALSE	:	FALSE	:	NonNegativeReals
	(7,	10)	:	0	:	0	:	None	:	FALSE	:	FALSE	:	NonNegativeReals
	(7,	11)	:	0	:	0	:	None	:	FALSE	:	FALSE	:	NonNegativeReals
	(8,	1)	:	0	:	0	:	None	:	FALSE	:	FALSE	:	NonNegativeReals
	(8,	2)	:	0	:	0	:	None	:	FALSE	:	FALSE	:	NonNegativeReals
	(8,	3)	:	0	:	4.56267	:	None	:	FALSE	:	FALSE	:	NonNegativeReals
	(8,	4)	:	0	:	0	:	None	:	FALSE	:	FALSE	:	NonNegativeReals
	(8,	5)	:	0	:	0	:	None	:	FALSE	:	FALSE	:	NonNegativeReals
	(8,	6)	:	0	:	0	:	None	:	FALSE	:	FALSE	:	NonNegativeReals
	(8,	7)	:	0	:	0	:	None	:	FALSE	:	FALSE	:	NonNegativeReals
	(8,	8)	:	0	:	0	:	None	:	FALSE	:	FALSE	:	NonNegativeReals
	(8,	9)	:	0	:	0	:	None	:	FALSE	:	FALSE	:	NonNegativeReals
	(8,	10)	:	0	:	0	:	None	:	FALSE	:	FALSE	:	NonNegativeReals
	(8,	11)	:	0	:	0	:	None	:	FALSE	:	FALSE	:	NonNegativeReals
	(9,	1)	:	0	:	0	:	None	:	FALSE	:	FALSE	:	NonNegativeReals
	(9,	2)	:	0	:	0	:	None	:	FALSE	:	FALSE	:	NonNegativeReals
	(9,	3)	:	0	:	0	:	None	:	FALSE	:	FALSE	:	NonNegativeReals
	(9,	4)	:	0	:	0	:	None	:	FALSE	:	FALSE	:	NonNegativeReals
	(9,	5)	:	0	:	0	:	None	:	FALSE	:	FALSE	:	NonNegativeReals
	(9,	6)	:	0	:	0	:	None	:	FALSE	:	FALSE	:	NonNegativeReals
	(9,	7)	:	0	:	0	:	None	:	FALSE	:	FALSE	:	NonNegativeReals
	(9,	8)	:	0	:	0	:	None	:	FALSE	:	FALSE	:	NonNegativeReals
	(9,	9)	:	0	:	0	:	None	:	FALSE	:	FALSE	:	NonNegativeReals
	(9,	10)	:	0	:	0	:	None	:	FALSE	:	FALSE	:	NonNegativeReals
	(9,	11)	:	0	:	495.635	:	None	:	FALSE	:	FALSE	:	NonNegativeReals
	(10,	1)	:	0	:	0	:	None	:	FALSE	:	FALSE	:	NonNegativeReals
	(10,	2)	:	0	:	0	:	None	:	FALSE	:	FALSE	:	NonNegativeReals
	(10,	3)	:	0	:	0	:	None	:	FALSE	:	FALSE	:	NonNegativeReals
	(10,	4)	:	0	:	0	:	None	:	FALSE	:	FALSE	:	NonNegativeReals
	(10,	5)	:	0	:	0	:	None	:	FALSE	:	FALSE	:	NonNegativeReals
	(10,	6)	:	0	:	0	:	None	:	FALSE	:	FALSE	:	NonNegativeReals
	(10,	7)	:	0	:	0	:	None	:	FALSE	:	FALSE	:	NonNegativeReals
	(10,	8)	:	0	:	0	:	None	:	FALSE	:	FALSE	:	NonNegativeReals
	(10,	9)	:	0	:	0	:	None	:	FALSE	:	FALSE	:	NonNegativeReals
	(10,	10)	:	0	:	0	:	None	:	FALSE	:	FALSE	:	NonNegativeReals
	(10,	11)	:	0	:	0	:	None	:	FALSE	:	FALSE	:	NonNegativeReals
	(11,	1)	:	0	:	0	:	None	:	FALSE	:	FALSE	:	NonNegativeReals
	(11,	2)	:	0	:	0	:	None	:	FALSE	:	FALSE	:	NonNegativeReals
	(11,	3)	:	0	:	0	:	None	:	FALSE	:	FALSE	:	NonNegativeReals
	(11,	4)	:	0	:	0	:	None	:	FALSE	:	FALSE	:	NonNegativeReals
	(11,	5)	:	0	:	0	:	None	:	FALSE	:	FALSE	:	NonNegativeReals
	(11,	6)	:	0	:	1113.66	:	None	:	FALSE	:	FALSE	:	NonNegativeReals
	(11,	7)	:	0	:	0	:	None	:	FALSE	:	FALSE	:	NonNegativeReals
	(11,	8)	:	0	:	0	:	None	:	FALSE	:	FALSE	:	NonNegativeReals
	(11,	9)	:	0	:	0	:	None	:	FALSE	:	FALSE	:	NonNegativeReals
	(11,	10)	:	0	:	0	:	None	:	FALSE	:	FALSE	:	NonNegativeReals
	(11,	11)	:	0	:	0	:	None	:	FALSE	:	FALSE	:	NonNegativeReals
	(12,	1)	:	0	:	462.6	:	None	:	FALSE	:	FALSE	:	NonNegativeReals
	(12,	2)	:	0	:	0	:	None	:	FALSE	:	FALSE	:	NonNegativeReals
	(12,	3)	:	0	:	0	:	None	:	FALSE	:	FALSE	:	NonNegativeReals
	(12,	4)	:	0	:	0	:	None	:	FALSE	:	FALSE	:	NonNegativeReals
	(12,	5)	:	0	:	0	:	None	:	FALSE	:	FALSE	:	NonNegativeReals
	(12,	6)	:	0	:	0	:	None	:	FALSE	:	FALSE	:	NonNegativeReals
	(12,	7)	:	0	:	0	:	None	:	FALSE	:	FALSE	:	NonNegativeReals
	(12,	8)	:	0	:	0	:	None	:	FALSE	:	FALSE	:	NonNegativeReals
	(12,	9)	:	0	:	0	:	None	:	FALSE	:	FALSE	:	NonNegativeReals
	(12,	10)	:	0	:	0	:	None	:	FALSE	:	FALSE	:	NonNegativeReals
	(12,	11)	:	0	:	0	:	None	:	FALSE	:	FALSE	:	NonNegativeReals
	(13,	1)	:	0	:	0	:	None	:	FALSE	:	FALSE	:	NonNegativeReals
	(13,	2)	:	0	:	0	:	None	:	FALSE	:	FALSE	:	NonNegativeReals
	(13,	3)	:	0	:	0	:	None	:	FALSE	:	FALSE	:	NonNegativeReals
	(13,	4)	:	0	:	0	:	None	:	FALSE	:	FALSE	:	NonNegativeReals
	(13,	5)	:	0	:	0	:	None	:	FALSE	:	FALSE	:	NonNegativeReals
	(13,	6)	:	0	:	0	:	None	:	FALSE	:	FALSE	:	NonNegativeReals
	(13,	7)	:	0	:	0	:	None	:	FALSE	:	FALSE	:	NonNegativeReals
	(13,	8)	:	0	:	0	:	None	:	FALSE	:	FALSE	:	NonNegativeReals
	(13,	9)	:	0	:	0	:	None	:	FALSE	:	FALSE	:	NonNegativeReals
	(13,	10)	:	0	:	0	:	None	:	FALSE	:	FALSE	:	NonNegativeReals
	(13,	11)	:	0	:	0	:	None	:	FALSE	:	FALSE	:	NonNegativeReals
	(14,	1)	:	0	:	0	:	None	:	FALSE	:	FALSE	:	NonNegativeReals
	(14,	2)	:	0	:	0	:	None	:	FALSE	:	FALSE	:	NonNegativeReals
	(14,	3)	:	0	:	0	:	None	:	FALSE	:	FALSE	:	NonNegativeReals
	(14,	4)	:	0	:	0	:	None	:	FALSE	:	FALSE	:	NonNegativeReals
	(14,	5)	:	0	:	0	:	None	:	FALSE	:	FALSE	:	NonNegativeReals
	(14,	6)	:	0	:	0	:	None	:	FALSE	:	FALSE	:	NonNegativeReals
	(14,	7)	:	0	:	0	:	None	:	FALSE	:	FALSE	:	NonNegativeReals
	(14,	8)	:	0	:	0	:	None	:	FALSE	:	FALSE	:	NonNegativeReals
	(14,	9)	:	0	:	0	:	None	:	FALSE	:	FALSE	:	NonNegativeReals
	(14,	10)	:	0	:	0	:	None	:	FALSE	:	FALSE	:	NonNegativeReals
	(14,	11)	:	0	:	0	:	None	:	FALSE	:	FALSE	:	NonNegativeReals
	(15,	1)	:	0	:	11084	:	None	:	FALSE	:	FALSE	:	NonNegativeReals
	(15,	2)	:	0	:	0	:	None	:	FALSE	:	FALSE	:	NonNegativeReals
	(15,	3)	:	0	:	0	:	None	:	FALSE	:	FALSE	:	NonNegativeReals
	(15,	4)	:	0	:	0	:	None	:	FALSE	:	FALSE	:	NonNegativeReals
	(15,	5)	:	0	:	0	:	None	:	FALSE	:	FALSE	:	NonNegativeReals
	(15,	6)	:	0	:	0	:	None	:	FALSE	:	FALSE	:	NonNegativeReals
	(15,	7)	:	0	:	0	:	None	:	FALSE	:	FALSE	:	NonNegativeReals
	(15,	8)	:	0	:	0	:	None	:	FALSE	:	FALSE	:	NonNegativeReals
	(15,	9)	:	0	:	0	:	None	:	FALSE	:	FALSE	:	NonNegativeReals
	(15,	10)	:	0	:	0	:	None	:	FALSE	:	FALSE	:	NonNegativeReals
	(15,	11)	:	0	:	0	:	None	:	FALSE	:	FALSE	:	NonNegativeReals
	(16,	1)	:	0	:	0	:	None	:	FALSE	:	FALSE	:	NonNegativeReals
	(16,	2)	:	0	:	0	:	None	:	FALSE	:	FALSE	:	NonNegativeReals
	(16,	3)	:	0	:	0	:	None	:	FALSE	:	FALSE	:	NonNegativeReals
	(16,	4)	:	0	:	0	:	None	:	FALSE	:	FALSE	:	NonNegativeReals
	(16,	5)	:	0	:	0	:	None	:	FALSE	:	FALSE	:	NonNegativeReals
	(16,	6)	:	0	:	0	:	None	:	FALSE	:	FALSE	:	NonNegativeReals
	(16,	7)	:	0	:	0	:	None	:	FALSE	:	FALSE	:	NonNegativeReals
	(16,	8)	:	0	:	0	:	None	:	FALSE	:	FALSE	:	NonNegativeReals
	(16,	9)	:	0	:	0	:	None	:	FALSE	:	FALSE	:	NonNegativeReals
	(16,	10)	:	0	:	0	:	None	:	FALSE	:	FALSE	:	NonNegativeReals
	(16,	11)	:	0	:	0	:	None	:	FALSE	:	FALSE	:	NonNegativeReals
	(17,	1)	:	0	:	4569.87	:	None	:	FALSE	:	FALSE	:	NonNegativeReals
	(17,	2)	:	0	:	0	:	None	:	FALSE	:	FALSE	:	NonNegativeReals
	(17,	3)	:	0	:	0	:	None	:	FALSE	:	FALSE	:	NonNegativeReals
	(17,	4)	:	0	:	0	:	None	:	FALSE	:	FALSE	:	NonNegativeReals
	(17,	5)	:	0	:	0	:	None	:	FALSE	:	FALSE	:	NonNegativeReals
	(17,	6)	:	0	:	0	:	None	:	FALSE	:	FALSE	:	NonNegativeReals
	(17,	7)	:	0	:	0	:	None	:	FALSE	:	FALSE	:	NonNegativeReals
	(17,	8)	:	0	:	0	:	None	:	FALSE	:	FALSE	:	NonNegativeReals
	(17,	9)	:	0	:	0	:	None	:	FALSE	:	FALSE	:	NonNegativeReals
	(17,	10)	:	0	:	0	:	None	:	FALSE	:	FALSE	:	NonNegativeReals
	(17,	11)	:	0	:	0	:	None	:	FALSE	:	FALSE	:	NonNegativeReals
	(18,	1)	:	0	:	1136.53	:	None	:	FALSE	:	FALSE	:	NonNegativeReals
	(18,	2)	:	0	:	0	:	None	:	FALSE	:	FALSE	:	NonNegativeReals
	(18,	3)	:	0	:	0	:	None	:	FALSE	:	FALSE	:	NonNegativeReals
	(18,	4)	:	0	:	0	:	None	:	FALSE	:	FALSE	:	NonNegativeReals
	(18,	5)	:	0	:	0	:	None	:	FALSE	:	FALSE	:	NonNegativeReals
	(18,	6)	:	0	:	0	:	None	:	FALSE	:	FALSE	:	NonNegativeReals
	(18,	7)	:	0	:	0	:	None	:	FALSE	:	FALSE	:	NonNegativeReals
	(18,	8)	:	0	:	0	:	None	:	FALSE	:	FALSE	:	NonNegativeReals
	(18,	9)	:	0	:	0	:	None	:	FALSE	:	FALSE	:	NonNegativeReals
	(18,	10)	:	0	:	0	:	None	:	FALSE	:	FALSE	:	NonNegativeReals
	(18,	11)	:	0	:	0	:	None	:	FALSE	:	FALSE	:	NonNegativeReals
	(19,	1)	:	0	:	0	:	None	:	FALSE	:	FALSE	:	NonNegativeReals
	(19,	2)	:	0	:	0	:	None	:	FALSE	:	FALSE	:	NonNegativeReals
	(19,	3)	:	0	:	0	:	None	:	FALSE	:	FALSE	:	NonNegativeReals
	(19,	4)	:	0	:	0	:	None	:	FALSE	:	FALSE	:	NonNegativeReals
	(19,	5)	:	0	:	0	:	None	:	FALSE	:	FALSE	:	NonNegativeReals
	(19,	6)	:	0	:	0	:	None	:	FALSE	:	FALSE	:	NonNegativeReals
	(19,	7)	:	0	:	0	:	None	:	FALSE	:	FALSE	:	NonNegativeReals
	(19,	8)	:	0	:	0	:	None	:	FALSE	:	FALSE	:	NonNegativeReals
	(19,	9)	:	0	:	0	:	None	:	FALSE	:	FALSE	:	NonNegativeReals
	(19,	10)	:	0	:	0	:	None	:	FALSE	:	FALSE	:	NonNegativeReals
	(19,	11)	:	0	:	0	:	None	:	FALSE	:	FALSE	:	NonNegativeReals
	(20,	1)	:	0	:	0	:	None	:	FALSE	:	FALSE	:	NonNegativeReals
	(20,	2)	:	0	:	0	:	None	:	FALSE	:	FALSE	:	NonNegativeReals
	(20,	3)	:	0	:	0	:	None	:	FALSE	:	FALSE	:	NonNegativeReals
	(20,	4)	:	0	:	0	:	None	:	FALSE	:	FALSE	:	NonNegativeReals
	(20,	5)	:	0	:	0	:	None	:	FALSE	:	FALSE	:	NonNegativeReals
	(20,	6)	:	0	:	0	:	None	:	FALSE	:	FALSE	:	NonNegativeReals
	(20,	7)	:	0	:	0	:	None	:	FALSE	:	FALSE	:	NonNegativeReals
	(20,	8)	:	0	:	0	:	None	:	FALSE	:	FALSE	:	NonNegativeReals
	(20,	9)	:	0	:	0	:	None	:	FALSE	:	FALSE	:	NonNegativeReals
	(20,	10)	:	0	:	0	:	None	:	FALSE	:	FALSE	:	NonNegativeReals
	(20,	11)	:	0	:	0	:	None	:	FALSE	:	FALSE	:	NonNegativeReals
	(21,	1)	:	0	:	0	:	None	:	FALSE	:	FALSE	:	NonNegativeReals
	(21,	2)	:	0	:	0	:	None	:	FALSE	:	FALSE	:	NonNegativeReals
	(21,	3)	:	0	:	0	:	None	:	FALSE	:	FALSE	:	NonNegativeReals
	(21,	4)	:	0	:	0	:	None	:	FALSE	:	FALSE	:	NonNegativeReals
	(21,	5)	:	0	:	0	:	None	:	FALSE	:	FALSE	:	NonNegativeReals
	(21,	6)	:	0	:	0	:	None	:	FALSE	:	FALSE	:	NonNegativeReals
	(21,	7)	:	0	:	0	:	None	:	FALSE	:	FALSE	:	NonNegativeReals
	(21,	8)	:	0	:	0	:	None	:	FALSE	:	FALSE	:	NonNegativeReals
	(21,	9)	:	0	:	0	:	None	:	FALSE	:	FALSE	:	NonNegativeReals
	(21,	10)	:	0	:	0	:	None	:	FALSE	:	FALSE	:	NonNegativeReals
	(21,	11)	:	0	:	0	:	None	:	FALSE	:	FALSE	:	NonNegativeReals
	(22,	1)	:	0	:	0	:	None	:	FALSE	:	FALSE	:	NonNegativeReals
	(22,	2)	:	0	:	0	:	None	:	FALSE	:	FALSE	:	NonNegativeReals
	(22,	3)	:	0	:	0	:	None	:	FALSE	:	FALSE	:	NonNegativeReals
	(22,	4)	:	0	:	0	:	None	:	FALSE	:	FALSE	:	NonNegativeReals
	(22,	5)	:	0	:	0	:	None	:	FALSE	:	FALSE	:	NonNegativeReals
	(22,	6)	:	0	:	0	:	None	:	FALSE	:	FALSE	:	NonNegativeReals
	(22,	7)	:	0	:	0	:	None	:	FALSE	:	FALSE	:	NonNegativeReals
	(22,	8)	:	0	:	0	:	None	:	FALSE	:	FALSE	:	NonNegativeReals
	(22,	9)	:	0	:	0	:	None	:	FALSE	:	FALSE	:	NonNegativeReals
	(22,	10)	:	0	:	0	:	None	:	FALSE	:	FALSE	:	NonNegativeReals
	(22,	11)	:	0	:	0	:	None	:	FALSE	:	FALSE	:	NonNegativeReals
	Objectives:
	obj	:	Size=1,	Index=None,	Active=True
	Key	:	Active	:	Value	profit
	None	:	TRUE	:	1.09663e+10	4.97912e+09
	Constraints:
	x_constraint	:	Size=22
	Key	:	Lower	:	Body	:	Upper
	1	:	0	:	2.72848e-12	:	0
	2	:	0	:	0	:	0
	3	:	0	:	0	:	0
	4	:	0	:	0	:	0
	5	:	0	:	0	:	0
	6	:	0	:	0	:	0
	7	:	0	:	0	:	0
	8	:	0	:	0	:	0
	9	:	0	:	0	:	0
	10	:	0	:	0	:	0
	11	:	0	:	0	:	0
	12	:	0	:	0	:	0
	13	:	0	:	0	:	0
	14	:	0	:	0	:	0
	15	:	0	:	0	:	0
	16	:	0	:	0	:	0
	17	:	0	:	0	:	0
	18	:	0	:	0	:	0
	19	:	0	:	0	:	0
	20	:	0	:	0	:	0
	21	:	0	:	0	:	0
	22	:	0	:	0	:	0
	y_constraint	:	Size=11
	Key	:	Lower	:	Body	:	Upper
	1	:	0	:	5.91172e-12	:	0
	2	:	0	:	0	:	0
	3	:	0	:	-3.9968e-15	:	0
	4	:	0	:	0	:	0
	5	:	0	:	2.27374e-13	:	0
	6	:	0	:	-2.84217e-14	:	0
	7	:	0	:	-6.66134e-16	:	0
	8	:	0	:	0	:	0
	9	:	0	:	-2.55795e-13	:	0
	10	:	0	:	1.7053e-12	:	0
	11	:	0	:	-7.10543e-15	:	0
	y_demand_constraint	:	Size=11
	Key	:	Lower	:	Body	:	Upper	percentage	profit (USD/Kiloton)	Tot profit
	1	:	None	:	2747.75	:	2747.75	1	708909	1.94791e+09
	2	:	None	:	0	:	405.55	0	1.13273e+07	0
	3	:	None	:	3.22581	:	3.22581	1	2.2307e+08	7.19581e+08
	4	:	None	:	0	:	83.901	0	2.0848e+08	0
	5	:	None	:	466.214	:	466.214	1	157500	7.34287e+07
	6	:	None	:	139.09	:	139.09	1	1292000	179704280
	7	:	None	:	0.26802	:	0.26802	1	4944370000	1.32519e+09
	8	:	None	:	0	:	1.41097	0	1.97e+07	0
	9	:	None	:	253.953	:	253.953	1	130000	33013890
	10	:	None	:	866	:	866	1	700000	606200000
	11	:	None	:	33.25	:	33.25	1	2830000	94097500
	x_fleet_constraint	:	Size=22
	Key	:	Lower	:	Body	:	Upper
	1	:	None	:	6067.94	:	12173.1
	2	:	None	:	0	:	19196
	3	:	None	:	0	:	45770.9
	4	:	None	:	0	:	22885.5
	5	:	None	:	7749.54	:	10004.2
	6	:	None	:	0	:	20863.1
	7	:	None	:	5.42237	:	3161.08
	8	:	None	:	4.56267	:	18227.5
	9	:	None	:	495.635	:	32400
	10	:	None	:	0	:	2800
	11	:	None	:	1113.66	:	21099.2
	12	:	None	:	462.6	:	462.6
	13	:	None	:	0	:	14333.6
	14	:	None	:	0	:	421.2
	15	:	None	:	11084	:	11084
	16	:	None	:	0	:	216
	17	:	None	:	4569.87	:	4569.87
	18	:	None	:	1136.53	:	1136.53
	19	:	None	:	0	:	2005.4
	20	:	None	:	0	:	588.781
	21	:	None	:	0	:	1081.09
	22	:	None	:	0	:	612.359

[truncated: 20 more sheets: EU_LP_GWP, EU_LP_GWP_eta80, EU_LP_GWP_eta120, EU_LP_GWP_FL80, EU_LP_GWP_FL120, EU_LP_Eco, EU_LP_Eco_eta80, EU_LP_Eco_eta120, EU_LP_Eco_FL80, EU_LP_Eco_FL120, CN_LP_Eco, CN_LP_Eco_eta120, CN_LP_Eco_eta80, CN_LP_Eco_FL80, CN_LP_Eco_FL120, US_LP_Eco, US_LP_Eco_FL80, US_LP_Eco_FL120, US_LP_Eco_eta80, US_LP_Eco_eta120]
