# Supplementary material
Source: Research Square preprint supplement (doi:10.21203/rs.3.rs-9225422/v1)
Supplement: Supplementary file 1 [file 6003565212526c0edf137287.docx]

*Supplementary Information*

**Upcycling food loss and byproducts to fulfill demand for key platform chemicals and enhance carbon and economic benefits**

Contents

[1. Identification of region of interest 2](#_Toc224724963)

[1.1 Global demand of top platform chemicals 2](#_Toc224724964)

[1.2 Food loss generation 4](#_Toc224724965)

[1.3 Python code for bivariate choropleth map (Figure 2) 5](#_Toc224724966)

[2. Estimation of Food loss and by-products (FLB) in China, the U.S. and the EU 5](#_Toc224724967)

[2.1 Selection of crops for further analysis 6](#_Toc224724968)

[2.2 Methodology 9](#_Toc224724969)

[2.3 Supplementary data for Sankey diagram 12](#_Toc224724970)

[3. Environmental analysis 18](#_Toc224724971)

[4. Economic analysis 19](#_Toc224724972)

[5. Yield of each food loss and by-product stream to each platform chemical 19](#_Toc224724973)

[6. Linear programming 25](#_Toc224724974)

[7. Supplementary information for results 27](#_Toc224724975)

[8. Scenario Analysis: Implications of Reducing Food Loss 30](#_Toc224724976)

[9. Sensitivity analysis 31](#_Toc224724977)

[Reference 33](#_Toc224724978)

# Identification of region of interest

## Global demand of top platform chemicals

**Platform chemical selection.** The PC involved this research is selected based on the report from the US Department of Energy1 and its follow-up research from Bozell and Petersen2. In 2004, the US Department of Energy conducted one of the largest comparative studies on biobased chemicals1. The goal was to shift away from fossil-based chemicals. The study reviewed 300 chemicals and identified a "top 10" list based on technical and economic factors. This list was updated in 20102 with the following selected chemicals: ethanol, lactic acid, succinic acid, levulinic acid, sorbitol, furans (furfural, HMF, FDCA), xylitol, glycerol, hydroxypropionic acid, and biohydrocarbons. In our study, we have done the following trimming to make the list more relevant for our research goals: (1) exclude glycerol: because glycerol is already a byproduct of biodiesel production and requires no further processing3; moreover, food loss contains a small lipid fraction compared to sugars, making glycerol production inefficient; (2) we expand the group “furans” into furfural, HMF and FDCA to facilitate a more accurate analysis; (3) we choose isoprene as the representative for the group “biohydrocarbons” as that is the most promising and concrete example within this group. Overall, we modify this list from top 10 chemicals (in fact 8 chemicals and 2 chemical groups) into 11 concrete chemicals, i.e., ethanol, furfural, hydroxymethylfurfural (HMF), 2,5-furandicarboxylic acid (FDCA), isoprene, succinic acid, 3-hydroxypropionic acid (3-HP), levulinic acid, lactic acid, sorbitol, xylitol.

The types of PC production vary across these regions. The U.S. holds a dominant position in the bioethanol market, largely driven by its domestic clean energy policies3. The EU focuses on producing biochemicals like lactic acid, FDCA, and HMF, which are commonly used in the production of biodegradable biopolymers as alternatives to conventional plastics. In contrast, China is a major producer of isoprene and succinic acid which are primarily produced from fossil fuels as well as furfural that is used in petrochemical refining (e.g., rubber production). Sorbitol production in China is also extensive, driven by demand from the cosmetics, pharmaceutical, and food industries4. Aside from these, 3-HP, levulinic acid, and xylitol have relatively similar market share across the U.S., China, and the EU.

Table S.1 The regional production/market share of the top platform chemicals

| Chemical | Country/region | Quantity or percentage | Reference |
| --- | --- | --- | --- |
| Ethanol  (million gallons) | United States | 15,400 | 5 |
| Brazil | 7420 |
| European Union | 1330 |
| India | 1090 |
| China | 920 |
| Thailand | 380 |
| Argentina | 290 |
| Furfural* | China | 81.11% | 6 |
| Western Europe | 10.28% |
| United States | 4.44% |
| HMF | European Union | 90% | 7 |
| North America | 5% |
| China | 5% |
| FDCA* | European Union | 46.0% | 8 |
| North America | 30% |
| Asia Pacific | 20% |
| Glycerol* | China | 28.33% | 9 |
| Western Europe | 16.39% |
| United States | 12.78% |
| India | 5.83% |
| Indonesia | 4.72% |
| Middle East | 4.72% |
| Other | 27.22% |
| Isoprene* | Russia | 33.3% | 10 |
| China | 28.5% |
| North America | 17.3% |
| Japan | 14% |
| Western Europe | 2% |
| Succinic acid* | China | 19.87% | 11–14 |
| India | 3.43% |
| Japan | 9.53% |
| United States | 9% |
| Europe | 10.66% |
| 3-HP* | North America | 35% |  |
| Europe | 30% | 15 |
| Asia Pacific | 25% |  |
| Levulinic acid*(USD Billion) | North America | 9.4 | 16 |
| Asia Pacific | 8.8 |
| Europe | 5.5 |
| Lactic acid | European Union | 58.17% | 17 |
| China | 18.27% |
| Thailand | 12.37% |
| US | 4.48% |
| Brazil | 3.20% |
| India | 1.70% |
| Japan | 1.82% |
| Sorbitol | Asia Pacific | 43.3% | 18 |
| North America | 24.1% |
| European Union | 21.0% |
| Xylitol | North America | 32.5% | 19 |
| Asia Pacific | 26.6% |
| Europe | 18.6% |

* The percentage is calculated from pie chart in the report.

Table S.2. The global annual production of top platform chemicals

| **Chemical** | **Production/**  **Market size** | **Units** | **Global annual production** | **Unit** | **Reference** |
| --- | --- | --- | --- | --- | --- |
| Furfural | 500 | kiloton | 500.00 | kiloton | 20 |
| HMF | 60 | Million USD | 64.52 | kiloton | 7 |
| FDCA | 763 | Million USD | 501.91 | kiloton | 8 |
| Glycerol | 1400 | kiloton | 1400.00 | kiloton | 21 |
| Isoprene | 283 | kilotons in US | 1635.84 | kiloton | 10,22 |
| Succinic acid | 700 | kiloton | 700.00 | kiloton | 23 |
| 3-HP | 2 | Million USD | 1.09 | kiloton | 15 |
| Levulinic acid | 4 | kiloton | 3.80 | kiloton | 24 |
| Lactic acid | 1390 | kiloton | 1390.00 | kiloton | 25 |
| Sorbitol | 2000 | kiloton | 2000.00 | kiloton | 26 |
| Xylitol | 125 | kiloton | 125.00 | kiloton | 27 |

Table S.3. The heatmap of the annual production (Unit: Kiloton) of top platform chemicals in top production countries or regions (Calculated based on Table S.1 and Table S.2)

| Country | US | China | EU | Brazil | India | Thailand | Indonesia | Russia | Japan |
| --- | --- | --- | --- | --- | --- | --- | --- | --- | --- |
| Ethanol | 45995.00 | 2747.75 | 3972.30 | 22,161 | 3,255 | 1,135 |  |  |  |
| Furfural | 22.20 | 405.55 | 51.40 |  |  |  |  |  |  |
| HMF | 3.23 | 3.23 | 58.06 |  |  |  |  |  |  |
| FDCA | 150.57 | 83.90 | 230.88 |  |  |  |  |  |  |
| Glycerol | 178.92 | 396.62 | 229.46 |  | 82 |  | 66 |  |  |
| Isoprene | 283.00 | 466.21 | 32.72 |  |  |  |  | 544.7 | 229.0 |
| Succinic acid | 63.00 | 139.09 | 74.62 |  | 24 |  |  |  | 67 |
| 3-HP | 0.38 | 0.27 | 0.33 |  |  |  |  |  |  |
| Levulinic acid | 1.51 | 1.41 | 0.88 |  |  |  |  |  |  |
| Lactic acid | 62.27 | 253.95 | 808.56 | 44.48 | 23.63 | 171.94 |  |  | 25.30 |
| Sorbitol | 482.00 | 866.00 | 420.00 |  |  |  |  |  |  |
| Xylitol | 40.63 | 33.25 | 23.25 |  |  |  |  |  |  |

## 1.2 Food loss generation

According to the United Nations Food and Agriculture Organization (FAO) statistics from 2016 to 2020, six countries and regions generate over 25 million tons of FL annually, ranked from highest to lowest: China, Brazil, India, Indonesia, the U.S., and the EU (27). Within these top six countries and regions, those with larger populations and lower per capita income tend to generate more FL, which is consistent with previous studies28.

Table S.4. The annual generation of food loss (Unit: Kiloton) in top platform chemical production countries or regions (data source: FAO food balance 29)

| **Area/Year** | **2016** | **2017** | **2018** | **2019** | **2020** | **Average** |
| --- | --- | --- | --- | --- | --- | --- |
| China | 107982 | 110018 | 111517 | 113582 | 114687 | 111557 |
| Brazil | 101145 | 103102 | 100386 | 111621 | 113105 | 105872 |
| India | 56293 | 67303 | 61312 | 64583 | 64774 | 62853 |
| Indonesia | 27724 | 32021 | 26999 | 70179 | 32122 | 37809 |
| United States of America | 32359 | 30372 | 30550 | 28804 | 29643 | 30346 |
| European Union (27) | 27551 | 29422 | 26433 | 27432 | 27012 | 27570 |
| Thailand | 6458 | 6482 | 6739 | 6619 | 6075 | 6475 |
| Russian Federation | 4408 | 4622 | 4459 | 4867 | 4466 | 4564 |
| Japan | 2579 | 2554 | 2531 | 2539 | 2503 | 2541 |

## 1.3 Python code for bivariate choropleth map (Figure 2)

For the reproduction of the bivariate choropleth map, GitHub repository: https://github.com/weiyujun18/Food2Chemical/blob/main/BivarieteMap.ipynb

# Estimation of Food loss and by-products (FLB) in China, the U.S. and the EU

In the initial step of our analysis, food loss data from the FAO Food Balance Sheet (FBS29) was utilized to identify the crops contributing to the top 80% of food loss in each region (refer to Figure S.1). Based on this, 10 crops are selected for China (i.e. corn, rice, wheat, sugar cane, potato, tomato, sweet potato, apple, orange, banana), 6 crops for the U.S. (i.e. corn, wheat, potato, tomato, sugar cane, sugar beet), and 8 crops (i.e. corn, barley, wheat, rapeseed, potato, tomato, sugar beet, apple) for the EU for further analysis.

## 2.1 Selection of crops for further analysis

1.
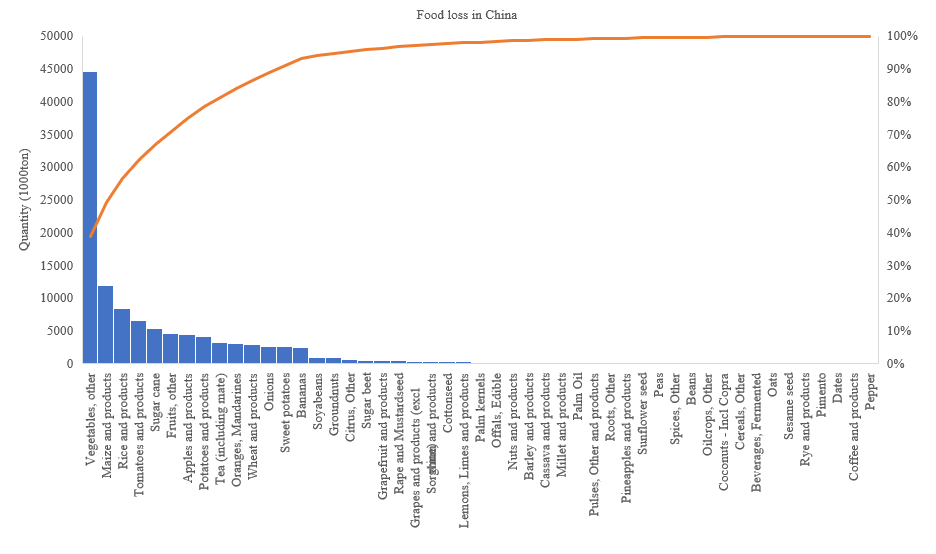
China
2.
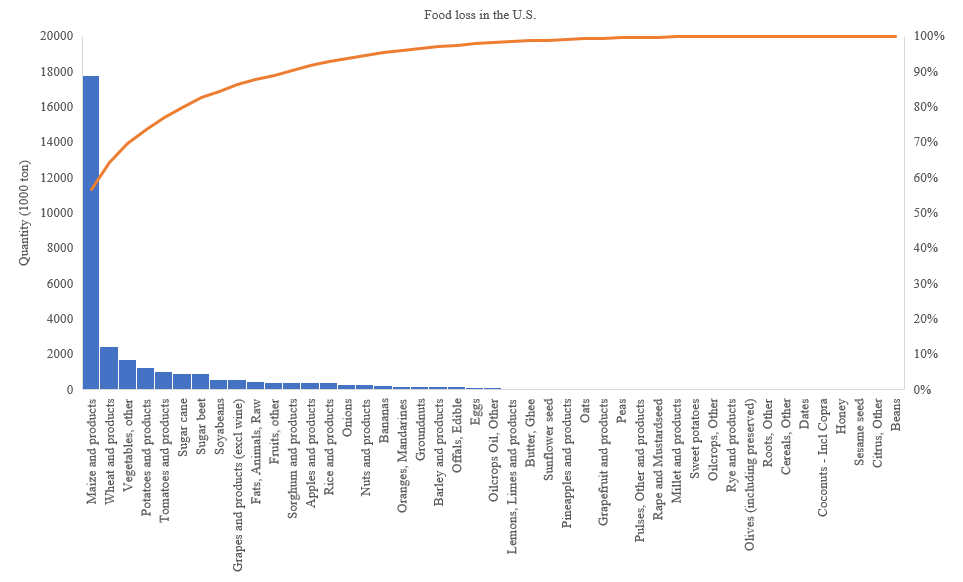
The U.S.
3.
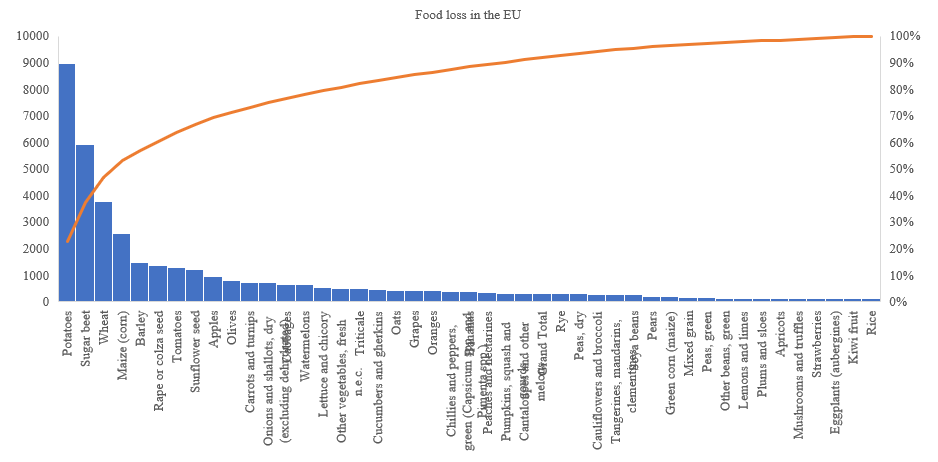
The EU
4. The Venn diagram of food loss and byproducts selected for three regions in this study


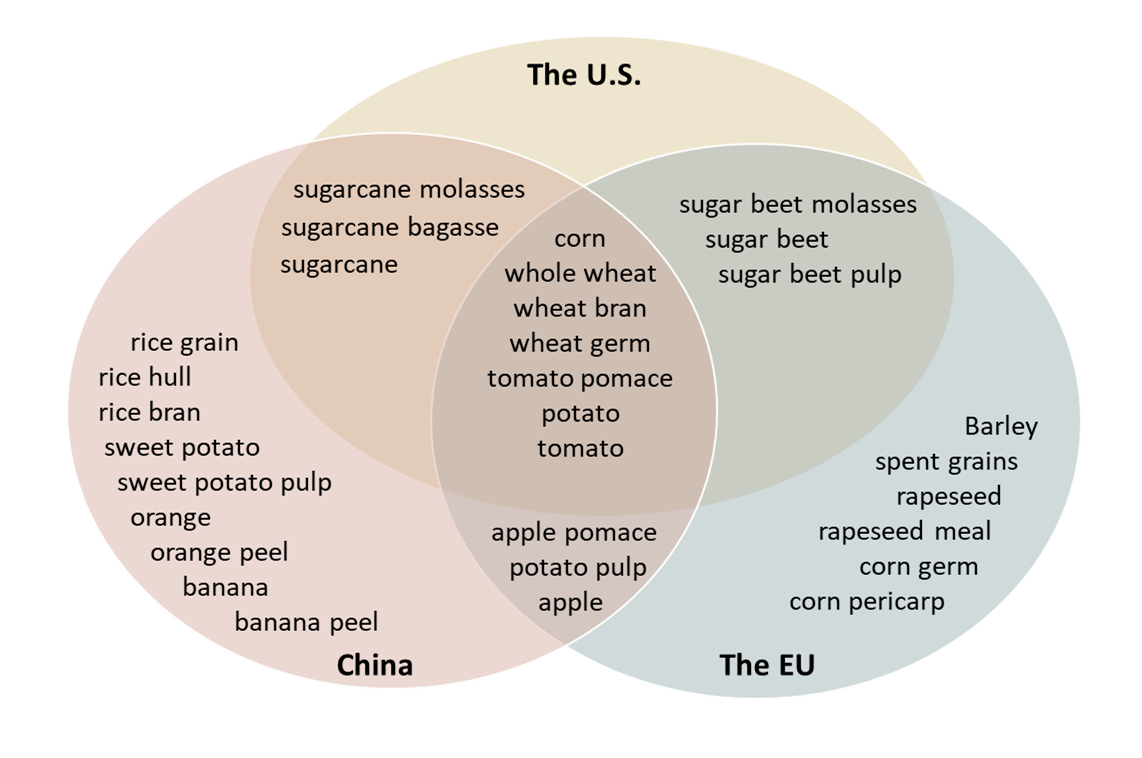


Figure S.1 Pareto chart of the food loss for each region (A-C). From this figure, top 80% of food loss for each region can be identified. Venn diagram (D) of the food loss and byproduct streams included in this study.

The *Vegetables, other* and *Fruits, other* are excluded because they are mixture of various crops. The sources of food loss in the EU are relatively scattered. According to our preliminary rough estimates, the top 65% of material flows is already more than enough to meet the demand of top platform chemicals in the EU. Therefore, the top eight crops are selected for the further analysis.

## 2.2 Methodology


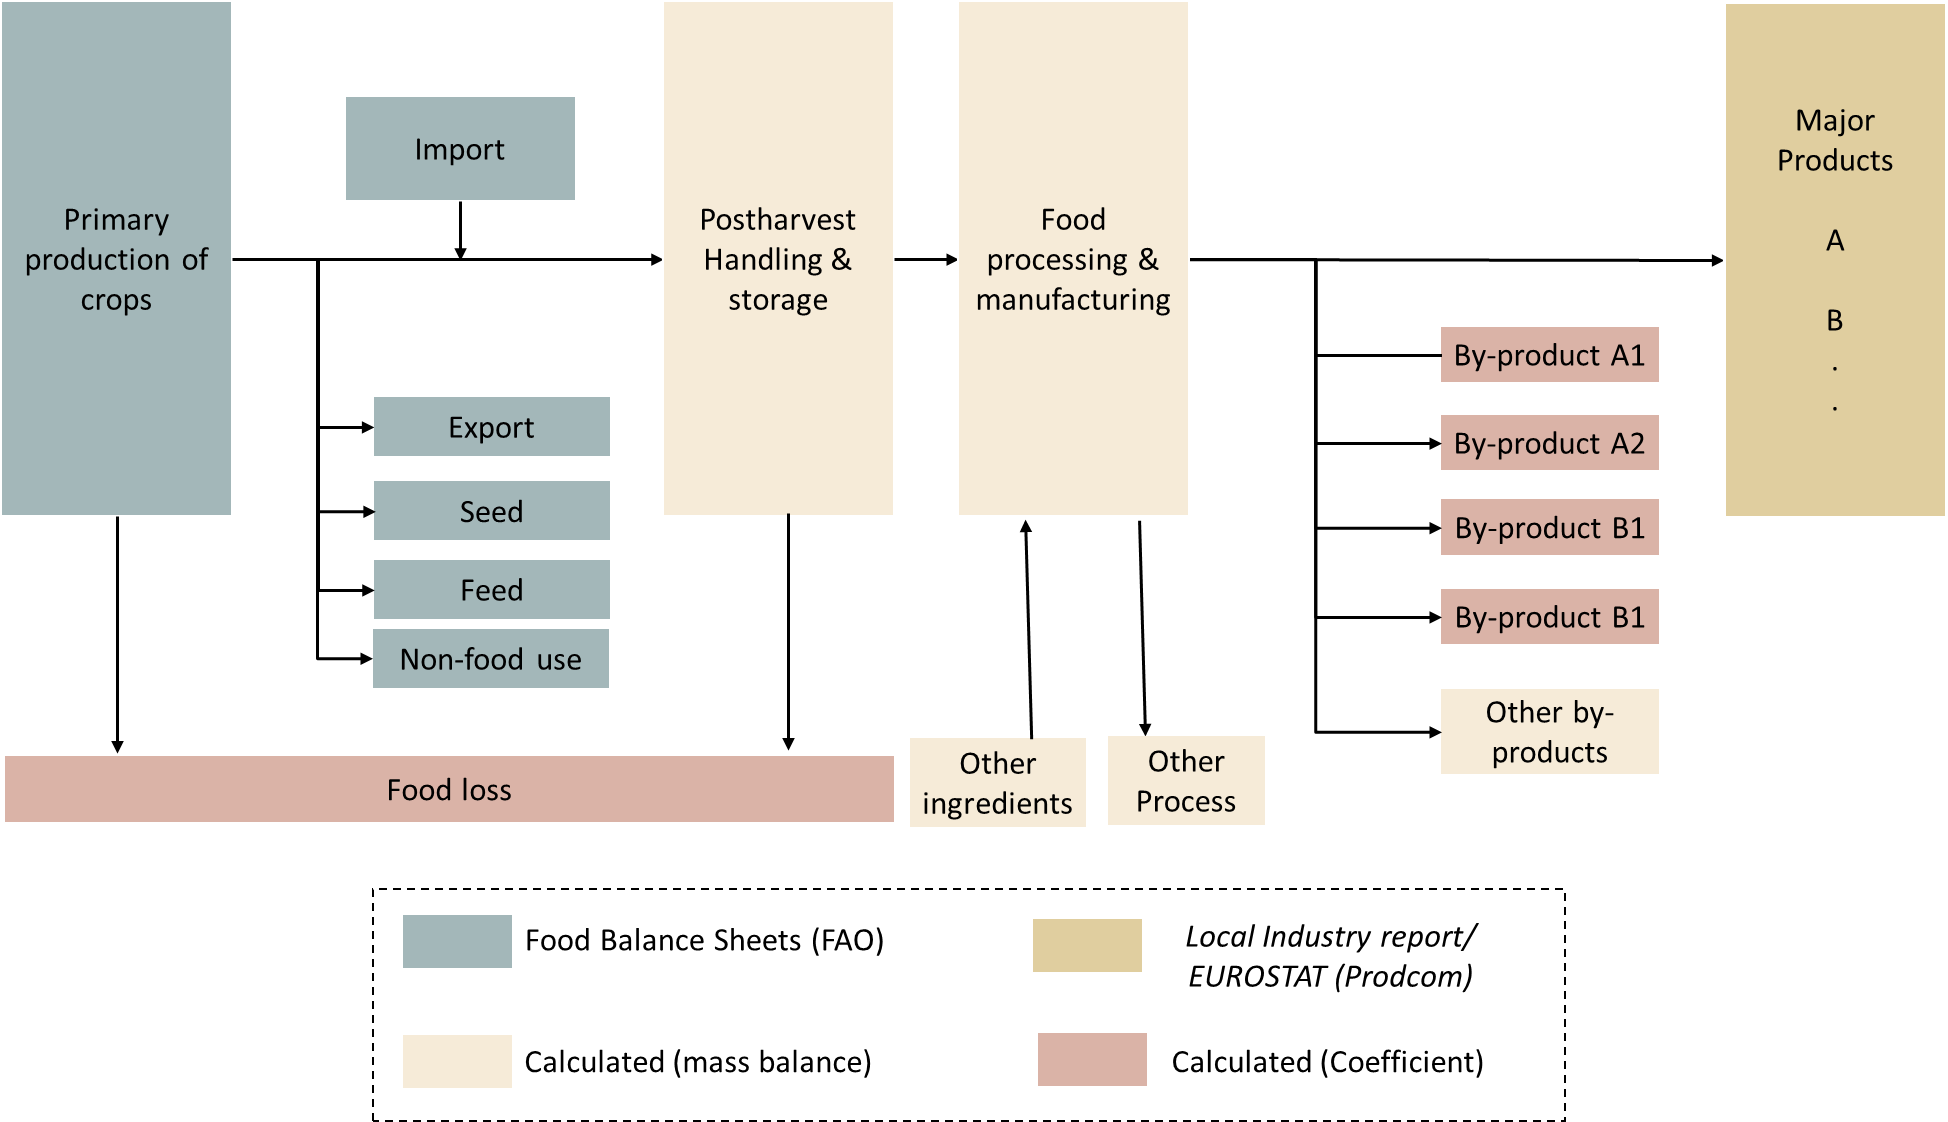


Figure S.2 Quantification approach for food loss and by-product per crop

A bidirectional quantification approach is developed for FLB quantification. Figure 2 presents this approach and the data sources for each step of this approach. To comprehensively understand the mass flow of food crops along the supply chain and calculate the FL at each stage, we follow **a forward supply chain flow**. Firstly, we collected quantity data from the FBS on production, import, export, feed, seed, and non-food use for each crop. Then, the FL coefficients at four chain stages—production, postharvest, storage, and processing—were sourced from local literature or reports. The reported production retrieved from public database is the quantity of food items enter the food supply chain, which means the loss in production stage has already been excluded. To calculate the total FL generated in the whole food system (Eq. 1), the calculate consists of two parts, the FL in primary production stage with the reported production and the loss rate of production stage (Eq.2), and the rest part of FL generated in the postharvest, storage, and primary processing chain stage, considering the import, export, seed, feed, and non-food use of the food.

|  | (1) |
| --- | --- |
| Where parameter is calculate as: |  |
|  | (2) |
| Parameter is calculate as: |  |
|  | (3) |

: Totol food loss for food item i

: The quantity of food item i that enter the local food supply chain

: The loss coefficient of food item i in the chain stage n

n: Food chain stage. n=1, 2, 3, 4 represents production, postharvest, storage, and primary processing respectively.

: The reported local production of food item i

: The import quantity of food item i

: The export quantity of food item i

: The quantity of food item i used for feed

: The quantity of food item i used for seed

: The quantity of food item used for non-food use

Then to understand the types and quantity of food byproducts (FB) generated in processing stage, we follow **a reverse supply chain flow**. Firstly, we identify the main food commodities of identified crops in the local market. Local marketing reports (e.g. Chinese industry report30) and market databases (e.g. Eurostat31) were prioritized to identify and quantify the main commodities of the identified crops. In cases where such data was unavailable, the FAO database and relevant literature were used. Then, by-products from the processing of identified commodities and their production coefficients were obtained from literature. When data was not available, the mass balance approach was employed to estimate by-products.

## 2.3 Supplementary data for Sankey diagram

Table S.5. The food loss generated through the whole food supply chain in China. (Unit: 1000 ton)

| Category | Import 29 | Production 29 | loss in production | | Export 29 | seed 29 | Feed 29 | non-food 29 | input_[postharvest] | loss in postharvest | |  | loss in storage | |  | loss in processing | |  |  |
| --- | --- | --- | --- | --- | --- | --- | --- | --- | --- | --- | --- | --- | --- | --- | --- | --- | --- | --- | --- |
| coefficient | production loss | coefficient | postharvest loss | input_[storage] | coefficient | storage loss | Input_[preprocess] | coefficient | processing loss | output | tot loss |
| Corn and products | 9681 | 260443 | 3,33% | 8972 | 736 | 2204 | 193023 | 47638 | 26523 | 1,41% | 374 | 26149 | 0,19% | 50 | 26100 | 2,87% | 749 | 25350 | 10144 |
| Rice and products | 5463 | 213241 | 2,84% | 6233 | 2750 | 6763 | 7687 | 1029 | 200476 | 1,90% | 3809 | 196667 | 1,21% | 2380 | 194287 | 1,84% | 3575 | 190712 | 15997 |
| Wheat and products | 6887 | 133389 | 3,12% | 4296 | 754 | 4117 | 19061 | 6933 | 109410 | 0,77% | 842 | 108568 | 0,58% | 630 | 107938 | 2,38% | 2569 | 105369 | 8337 |
| Sugarcane | 127 | 107206 | 5% | 5646 | 2 | 0 | 9507 | 0 | 97823 | 5% | 4894 | 92929 | 5% | 4649 | 88280 |  |  | 88280 | 15190 |
| Potatoes and products | 531 | 89272 | 4,41% | 4119 | 527 | 2799 | 13679 | 29 | 72769 | 2,55%32 | 1856 | 70914 | 16,37% | 11609 | 59305 |  |  | 59305 | 17583 |
| Tomatoes and products | 108 | 60950 | 2,11% | 1314 | 3654 | 0 | 0 | 0 | 57404 | 8,49% | 4874 | 52530 | 10,96% | 5757 | 46773 |  |  | 46773 | 11945 |
| Sweet potatoes | 7 | 51537 | 4,41% | 2378 | 36 | 0 | 19759 | 1 | 31748 | 5,40%32 | 1714 | 30033 | 17,13% | 5145 | 24889 |  |  | 24889 | 9237 |
| Apples and products | 434 | 40790 | 5,55% | 2397 | 1928 | 0 | 0 | 0 | 39296 | 0,61% | 240 | 39056 | 3% | 1172 | 37884 |  |  | 37884 | 3808 |
| Oranges, Mandarins | 899 | 28712 | 3,32% | 986 | 887 | 0 | 0 | 1 | 28722 | 1,22% | 350 | 28372 | 1,18% | 335 | 28037 |  |  | 28037 | 1671 |
| Bananas | 1505 | 11635 | 4,44% | 541 | 22 | 0 | 0 | 0 | 13118 | 0,61% | 80 | 13038 | 2,15% | 280 | 12757 |  |  | 12757 | 901 |
| Reference: the coefficients in blue shade 33; the coefficients in grey shade 29; ; the coefficients in orange shade 34. | | | | | | | | | | | | | | | | | | | |

Table S.6. The food by-products generated in the food processing in China. By-product (% ) are derived from the cited literature in the “Type of by-product” column

| Category | loss in previous stages (1000t) | input_[fresh sold and/or deep processing] (1000t) | fresh sold (1000t) | Input_[process ](1000t) | processed product | quantity (1000t) | Type of by-product | by-product (% ) | unit | Quantity of by-product (1000t) | sum of by-product (1000t) |
| --- | --- | --- | --- | --- | --- | --- | --- | --- | --- | --- | --- |
| Corn | 10144 | 25350 |  |  |  |  |  |  |  |  |  |
| rice | 15997 | 190712 | 0 | 190712 | rice | 133499 | rice husk 35 | 20% | % raw material | 38142 | 57214 |
|  |  |  |  |  |  |  | rice bran 36 | 10% | % raw material | 19071 |  |
| wheat | 8337 | 105369 | 0 | 105369 | wheat flour | 85349 | wheat bran 37 | 17% | % raw material | 17386 | 20020 |
|  |  |  |  |  |  |  | wheat germ 38 | 3% | % raw material | 2634 |  |
| Sugarcane | 15190 | 88280 | 13280 | 75000 | sugar39 | 9000 | filter cake40 | 31% | % final product | 2792 | 66000 |
|  |  |  |  |  |  |  | molasses 40 | 26% | % final product | 2333 |  |
|  |  |  |  |  |  |  | bagasse 40 | 300% | % final product | 27000 |  |
|  |  |  |  |  |  |  | Other side-streams | mass balance |  | 33875 |  |
| Potatoes and products | 17583 | 59305 | 37024 41 | 22281 | potato starch42 | 514 | potato pulp 43 | 75% | % final product | 386 | 3470 |
|  |  |  |  |  |  |  | potato liquor 43 | 600% | % final product | 3084 |  |
|  |  |  |  |  | other processing (mass balance) | 18298 |  |  |  |  |  |
| Tomatoes and products | 11945 | 46773 | 33093 44 | 13679 | Tomato puree and paste 45 | 780 | tomato pomace 46 | 8% | % raw material | 351 | 3900 |
|  |  |  |  |  |  |  | Other side-streams | mass balance |  | 3549 |  |
|  |  |  |  |  | other processing (mass balance) | 8999 |  |  |  |  |  |
| Sweet potatoes | 9237 | 24889 | 1244447 | 12444 | sweet potato starch 42 | 240 | sweet potato pulp 43 | 75% | % final product | 180 | 1620 |
|  |  |  |  |  |  |  | sweet potato liquor43 | 600% | % final product | 1440 |  |
|  |  |  |  |  | other processing (mass balance) | 10584 |  |  |  |  |  |
| Apples and products | 3808 | 37884 | 3409648 | 3788 | Apple juice concentrate 49 | 541 | apple pomace 50 | 25% | % raw material | 947 | 3247 |
|  |  |  |  |  |  |  | Other side-streams | mass balance |  | 2300 |  |
| Oranges, Mandarins | 1671 | 28037 | 26635 51 | 1402 | Canned orange | 911 | orange peel 52 | 35% | % raw material | 491 | 491 |
| Bananas | 901 | 12757 | 11482 53 | 1276 | Banana chips, powder | 765 | banana peel 54 | 40% | % raw material | 510 | 510 |

Table S.7. The food loss generated through the whole food supply chain in the U.S. (Unit: 1000 ton)

| Category | Import 29 | Production 29 | loss in production | | Export 29 | seed 29 | Feed 29 | non-food 29 | input_[postharvest] | loss in postharvest and storage | |  |  |
| --- | --- | --- | --- | --- | --- | --- | --- | --- | --- | --- | --- | --- | --- |
| coefficient | production loss | coefficient | postharvest loss | Input_[processing] | tot loss |
| Corn and products | 2055,2 | 370405,8 | 5% 29 | 19.495 | 55009,6 | 796,4 | 139971,2 | 129446,4 | 47.237 | 0 | 0 | 47.237 | 19.495 |
| Wheat and products | 9280 | 52876 | 2% | 1.079 | 28532,8 | 1682,8 | 3162,4 | 39,2 | 28.739 | 2,00% | 574,8 | 28.164,0 | 1.653,9 |
| Potatoes and products | 3258 | 19868 | 20% | 4.967 | 3453,2 | 1093,8 | 117,8 | 179 | 18.282 | 4,00% | 731,3 | 17.550,9 | 5.698,3 |
| Tomatoes and products | 1924 | 12203 | 20% | 3.051 | 1451 | 0 | 0 | 0 | 12.676 | 4,00% | 507,0 | 12.169,0 | 3.557,8 |
| Sugarcane and products | 7 | 30469,6 | 3% | 942 | 0,2 | 1640,8 | 2564 | 0 | 26.272 | 3,00% | 788,1 | 25.483,5 | 1.730,5 |
| Sugar beets and products | 18 | 30441,2 | 3% | 941 | 0 | 0 | 159,8 | 0 | 30.299 | 3,00% | 909,0 | 29.390,4 | 1.850,5 |
| Reference: the coefficient in blue shade 55; the coefficients in orange shade 56. | | | | | | | | | | | | | |

Table S.8. The food by-products generated in the food processing in the U.S.

| Category | loss in previous stages (1000t) | input_[fresh sold and/or deep processing (1000t) | fresh sold (1000t) | Input_[process] (1000t) | processed product | quantity (1000t) | Type of by-product | by-product (%) | unit | Quantity of by-product (1000t) | sum of by-product (1000t) | Other processing |
| --- | --- | --- | --- | --- | --- | --- | --- | --- | --- | --- | --- | --- |
| Corn and products | 19.495 | 47237,40 | 19.208 | 28029,8 29 |  |  |  |  |  |  |  |  |
| Wheat and products | 1.654 | 28164,02 | 0 | 28164,024 | Wheat flour | 22812,86 | wheat bran 37 | 17% | % raw material | 4647,06 | 5351,16 | 0,00 |
|  |  |  |  |  |  |  | wheat germ 38 | 3% | % raw material | 704,10 |  |  |
| Potatoes and products | 5698,29 | 17550,91 | 5089,7657 | 12461,15 | Frozen Potatoes | 7722,40 | Whole/Scrap Potato 58 | 13,77% | % raw material | 1233,39 | 1233,39 | 3505,35 |
| Tomatoes and products | 3557,79 | 12168,96 | N/A | 12168,96 | Tomato Paste 29 | 367,14 | Tomato pomace 46 | 8,00% | % raw material | 176,23 | 1835,70 | 9966,12 |
|  |  |  |  |  |  |  | other byproducts |  | mass balance | 1659,47 |  |  |
| Sugarcane and products | 1.731 | 25483,45 | 0 | 25483,45 | Sugar | 3058,01 | filter cake 40 | 31% | % final product | 948,55 | 10915,41 | 11510,03 |
|  |  |  |  |  |  |  | molasses 40 | 26% | % final product | 792,82 |  |  |
|  |  |  |  |  |  |  | bagasse 40 | 300% | % final product | 9174,04 |  |  |
| Sugar beets and products | 1.850 | 29390,42 | 995 | 28395,4 29 | Sugar 59 | 4543,26 | Sugar beet pulp 59 | 50% | % raw material | 14197,70 | 23852,14 |  |
|  |  |  |  |  |  |  | molasses 59 | 3,80% | % raw material | 1079,03 |  |  |
|  |  |  |  |  |  |  | Other (mass balance) | 30,20% | % raw material | 8575,41 |  |  |

Table S.9. The food loss generated through the whole food supply chain in the EU. (Unit: 1000 ton)

| Category | Import 29 | production (1000t) 29 | loss in primary production | | Export 29 | Seed 29 | Feed 29 | non-food 29 | input_[postharvest] |
| --- | --- | --- | --- | --- | --- | --- | --- | --- | --- |
| coefficient | production loss |
| Potatoes and products | 9597,88 | 108570,70 | 10% | 12.063,41 | 8816,64 | 15510,67 | 18037,30 | 1375,07 | 74428,90 |
| Sugar beet | 624,43 | 167716,72 | 5% | 8.827,20 | 603,55 | 0,00 | 8141,40 | 4362,39 | 155233,81 |
| Wheat and products | 38470,91 | 257516,76 | 6,50% | 17.902,23 | 110706,40 | 16281,63 | 63092,19 | 4111,67 | 101795,78 |
| Corn and products | 36441,77 | 122611,19 | 6,50% | 8.523,77 | 50804,71 | 842,33 | 80415,08 | 2318,16 | 24672,69 |
| Barley and products | 9354,03 | 90825,33 | 6,50% | 6.314,06 | 24481,75 | 6618,22 | 50096,72 | 1423,96 | 17558,71 |
| Rape and Mustard seed | 13152,35 | 24298,04 | 3% | 751,49 | 10273,05 | 159,63 | 1142,94 | 0,26 | 25874,52 |
| Tomatoes and products | 3898,79 | 23515,82 | 15,50% | 4.313,55 | 2920,45 | 0,00 | 146,78 | 0,00 | 24347,38 |
| Apples | 3953,05 | 17227,53 | 14% | 2.804,48 | 4000,43 | 0,00 | 507,63 | 0,00 | 16672,52 |
| Reference: the coefficients in blue shade 60 | | | | | | | | | |

Table S.10. The food by-products generated in the food processing in the EU.

| Category | loss in previous stages (1000t) | input_[fresh sold and/or deep processing (1000t) | fresh sold (1000t) | Input_process (1000t) | processed product | quantity (1000t) 61 | Type of by-product | by-product (%) | unit | Quantity of by-product (1000t) | sum of by-product (1000t) | Other processing |
| --- | --- | --- | --- | --- | --- | --- | --- | --- | --- | --- | --- | --- |
| Potatoes and products | 12063,4 | 74428,9 | 65631,9 | 8797 | Frozen potatoes | 4541,00 | Whole/Scrap Potato 58 | 13,77% | % raw material | 725,27 | 1632 | 1414 |
|  |  |  |  |  | Potato starch | 1209,28 | potato pulp 43 | 75% | % final product | 907 |  |  |
| Sugar beet | 8827,2 | 155233,8 | 0,0 | 155233,8 | Sugar 62 | 18000,00 | Sugar beet pulp59 | 50% | % raw material | 56250 | 94500 | 34347,97 |
|  |  |  |  |  |  |  | molasses 59 | 3,80% | % raw material | 4275 |  |  |
|  |  |  |  |  |  |  | Other (mass balance) | 30,20% | % raw material | 33975 |  |  |
| Wheat and products | 17902,2 | 101795,8 | 0,0 | 101795,8 | Wheat flour | 82278,08 | wheat bran 37 | 17% | % raw material | 16760 | 19300 | 217,9 |
|  |  |  |  |  |  |  | wheat germ 38 | 3% | % raw material | 2539 |  |  |
|  |  |  |  |  | pellet of wheat | 217,91 |  |  |  |  |  |  |
| Corn and products | 8523,8 | 24672,7 | 0,0 | 24672,7 | Corn starch 63 | 1626,52 | Germ 64 | 17,15% | % raw material | 737 | 2686 | 12391 |
|  |  |  |  |  |  |  | Pericarp 64 | 7,50% | % raw material | 322 |  |  |
|  |  |  |  |  |  |  | Other | 37,85% | % raw material | 1627 |  |  |
| Barley and products | 6314,1 | 17558,7 | 0,0 | 9470 65 | Beer | 34007,51 | Spent grains 66 | 136% | 1000 ton/1000L beer | 46349 | 47059 | 2184,6 |
|  |  |  |  |  |  |  | Malting germ 67 | 4,50% | % of raw material | 426 |  |  |
|  |  |  |  |  |  |  | Malting rootlets 68 | 3% | % of raw material | 284 |  |  |
| Rapeseed | 751,5 | 25874,5 | 3642,6 | 22232 | Rapeseed oil 29 | 8700,73 | Rapeseed meal (mass balance) | 52% | % raw material | 13531 | 13531 |  |
| Tomatoes and products | 4313,6 | 24347,4 | 16390,6 | 7957 29 | Tomato puree and paste | 1210,65 | tomato pomace 46 | 8% | % raw material | 545 | 6053 | 693 |
|  |  |  |  |  |  |  | other side-stream | mass balance |  | 5508 |  |  |
| Apples | 2804,48 | 16672,52 | 8336,3 | 8336,26 | Apple juice | 1933,78 | apple pomace | 25% | % raw material | 645 | 645 | 4551,95 |

Each region has very distinct FLB patterns. From quantity perspective, FB is the major streams in all three study regions, accounting for 62.27% (China), 55.96% (the U.S.) and 75.09% (the EU) of the total FLB in respective regions. In terms of the types of crops, sugar crops and cereals contribute the majority of by-products in all three study regions. In China, 49.36% of by-products come from grain processing, while 42.18% are derived from sugar production. In the U.S., 80.50% of the byproducts in the region come from sugar processing. In the EU, 50.97% of by-products come from sugar processing, and 35.79% from grain processing, particularly from beer brewing. This implies that in developing countries and regions like China, attention should be focused on by-products from primary agricultural processing, whereas in developed regions, by-products from deep processing dominate in volume and thus deserve greater attention for optimal management.

#
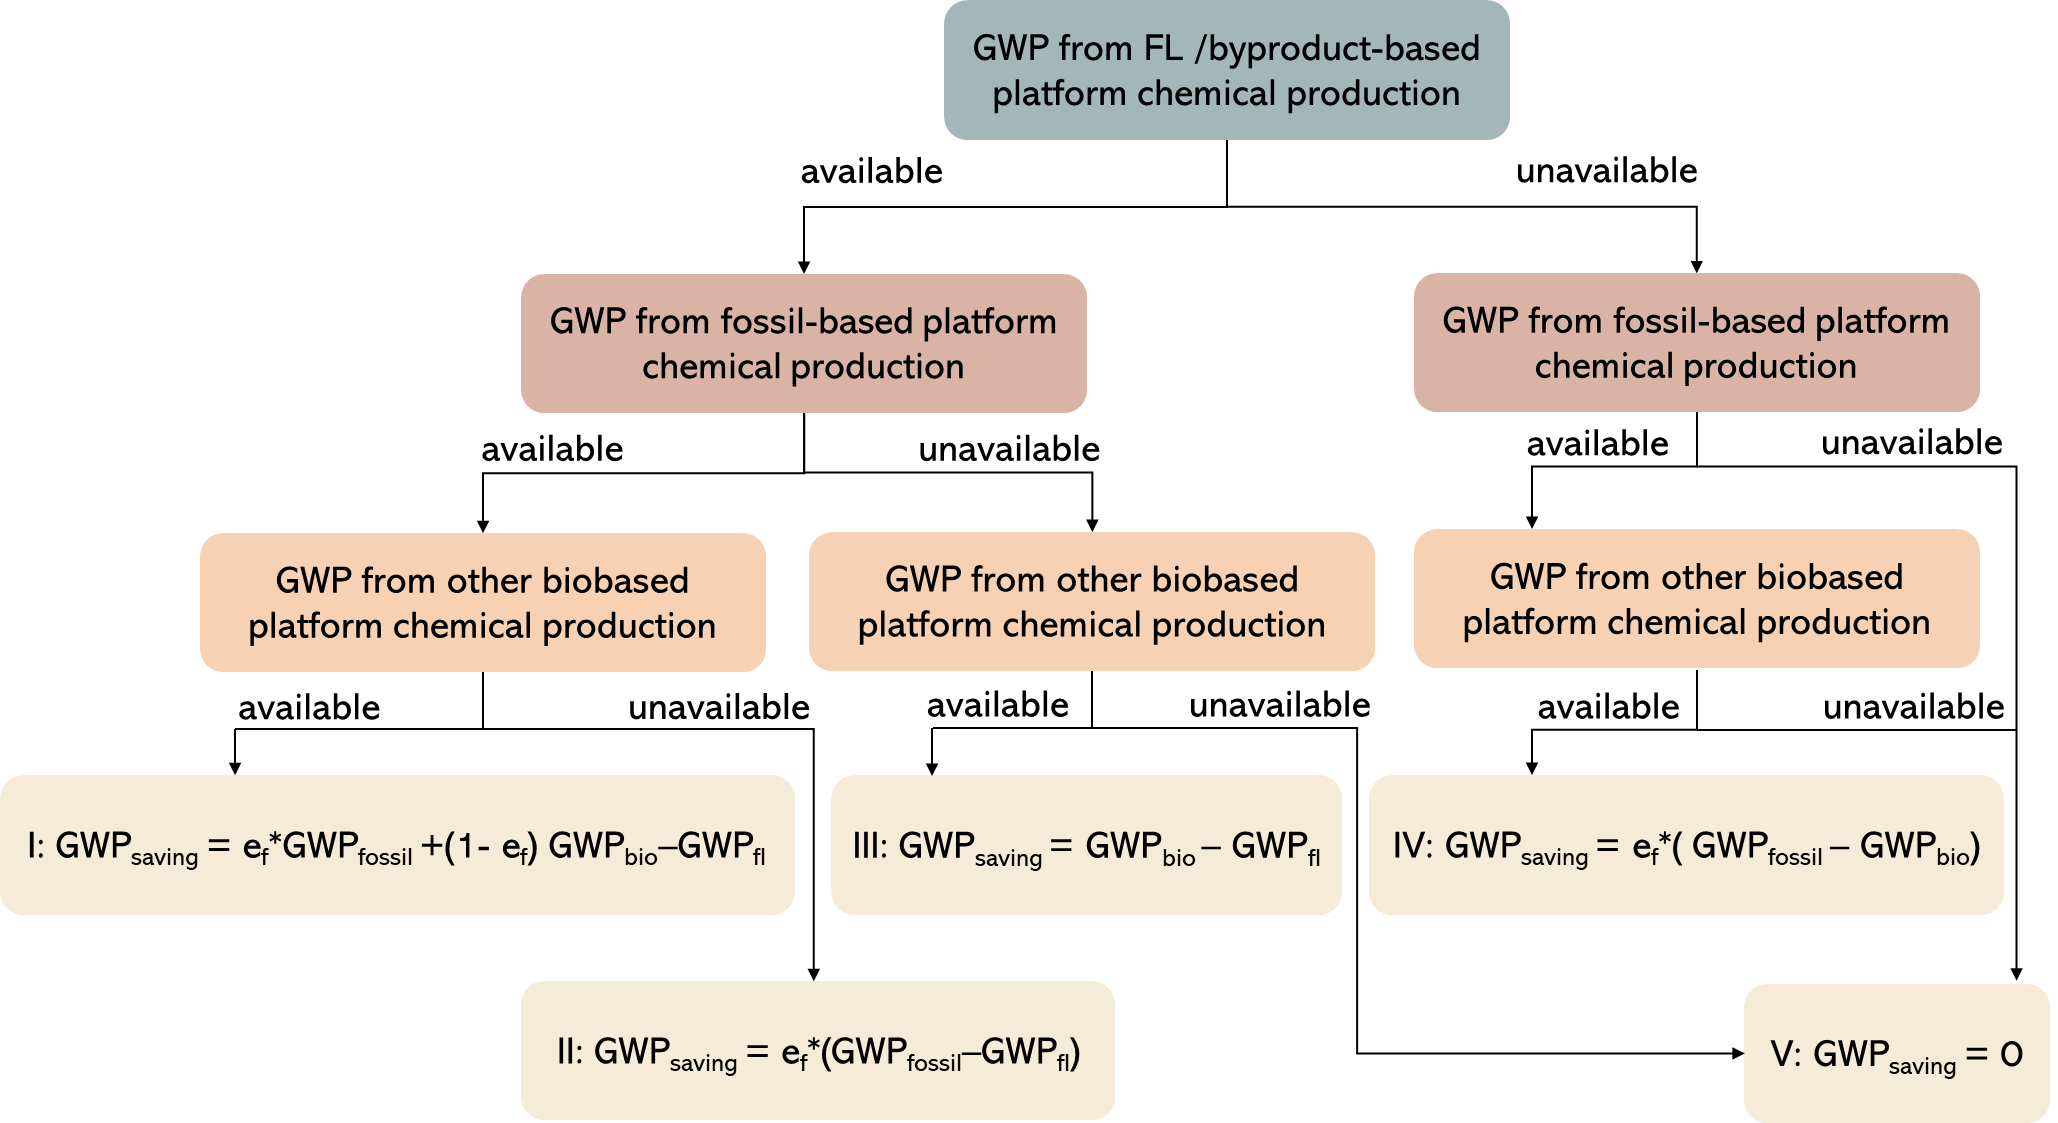
Environmental analysis

Figure S.3 The decision tree followed to calculate GWP saving for each platform chemical. Available/Unavailable: the availability of the data in the literature. GWP saving (unit: kg CO2-eq per kiloton of chemical) is defined as the difference between the GWP of current production (i.e. baseline scenario, can be fossil-based production, bio-based production, or fossil and bio-based combined production) and the GWP of FLB-based production. GWPfossil: the GWP of fossil-based production. GWPbio: the GWP of fossil-based production. GWPfl:the GWP of FLB-based production. ef: the share of fossil-based production in current market.

Table S.11 The GWPsaving of food loss and byproduct-based platform chemicals biogenic carbon is included

| **Chemicals** | **GWPfossil** | **GWPbio** | **GWPfl** | **ef*** | **GWPsaving** **(kg CO2eq-/kg)** | **GWPsaving (kg CO2eq-/Kiloton)** |
| --- | --- | --- | --- | --- | --- | --- |
| Ethanol | 3,7 69 | 1,65 69 | 0,27 70 | 2% 71 | 1,42 | 1422903 |
| Furfural | 0 | -1,90 72 | -1,9 73 | 0 | 0,00 | 0 |
| HMF | 0 | 8,05 74 | 0,02 75 | 0 | 8,03 | 8033410 |
| FDCA | 0 | 8,75 72 | 8,75 72 | 0 | 0,00 | 0 |
| Isoprene | 2,8 72 | 5,30 72 | -4,59 76 | 99% 77 | 7,42 | 7415000 |
| Succinic acid | 8,3 72 | 0,13 72 | 1,3 78 | 99% 72 | 6,92 | 6918300 |
| 3-HP | 0 | 3,00 79 | 1,52 79 | 0 80 | 1,48 | 1480560 |
| Levulinic acid | 0 | 6,30 81 | 6,3 81 | 0 82 | 0,00 | 0 |
| Lactic acid | 7,5 72 | 0,27 72 | -2,8 83 | 10% 84 | 3,79 | 3793000 |
| Sorbitol | 0 | 3,55 85 | 1,72 86 | 0 87 | 1,83 | 1834000 |
| Xylitol | 0 | 3,59 88 | 1,8 89 | 0 | 1,79 | 1790000 |

*ef: the share of fossil-based production in current market.

# Economic analysis

Table S.12 The regional price, cost, and regional profit of top platform chemicals

| **Chemicals** | **Local price (USD / Kiloton)** | | | **Cost (USD / Kiloton)** | **Profit (USD / Kiloton)** | | |
| --- | --- | --- | --- | --- | --- | --- | --- |
| **US** | **CN** | **EU** | **US** | **CN** | **EU** |
| Ethanol | 901141 90 | 861000 91 | 875000 | 152091 92 | 749.049 | 708.909 | 722.909 |
| Furfural | 16240000 | 13104000 | 17006000 | 1776700 93 | 14.463.300 | 11.327.300 | 15.229.300 |
| HMF | 7110000000 | 224000000 | 6458400000 | 930000 94 | 7.109.070.000 | 223.070.000 | 6.457.470.000 |
| FDCA | 846000000 | 210000000 | 540000000 95 | 1520000 74 | 844.480.000 | 208.480.000 | 538.480.000 |
| Isoprene | 1560000 96 | 1260000 30 | 1800000 97 | 1102500 30 | 457.500 | 157.500 | 697.500 |
| Succinic acid | 2007000 | 1842000 | 1962000 | 550000 98 | 1.457.000 | 1.292.000 | 1.412.000 |
| 3-HP | 7040000000 | 4946200000 | 5960000000 | 1830000 79 | 7.038.170.000 | 4.944.370.000 | 5.958.170.000 |
| Levulinic acid | 21640000 | 21000000 | 27302400 | 1300000 99 | 20.340.000 | 19.700.000 | 26.002.400 |
| Lactic acid | 1420000 | 1140000 | 1200000 | 1010000 100 | 410.000 | 130.000 | 190.000 |
| Sorbitol | 760000 101 | 980000 101 | 650000 101 | 280000 102 | 480.000 | 700.000 | 370.000 |
| Xylitol | 6500000 103 | 3080000 | 5000000 104 | 250000 102 | 6.250.000 | 2.830.000 | 4.750.000 |
| Reference: the data in blue shade 105; the data in grey shade 106; the data in orange shade 107; the data in green shade 108 | | | | | | | |

# Yield of each food loss and by-product stream to each platform chemical

The literature review is conducted on Scopus to collect yield data of each food loss and by-product stream to platform chemicals. All the search string applied in this study can be found in *Supplementary Excel 1-Sheet “String”*. For the pathways with no available literature, the theoretical yield is calculated based on the sugar composition of FLB stream and the yield of certain sugar to PC (Figure S.4)Table S.14 summarize the yield of studied top platform chemicals from each food loss and by-product stream. The raw data can be found in *Supplementary Excel 1-Sheet “Yield_FLB_PC”*. The Detailed calculation is provided in *Supplementary Excel 2_Yield calculation.*


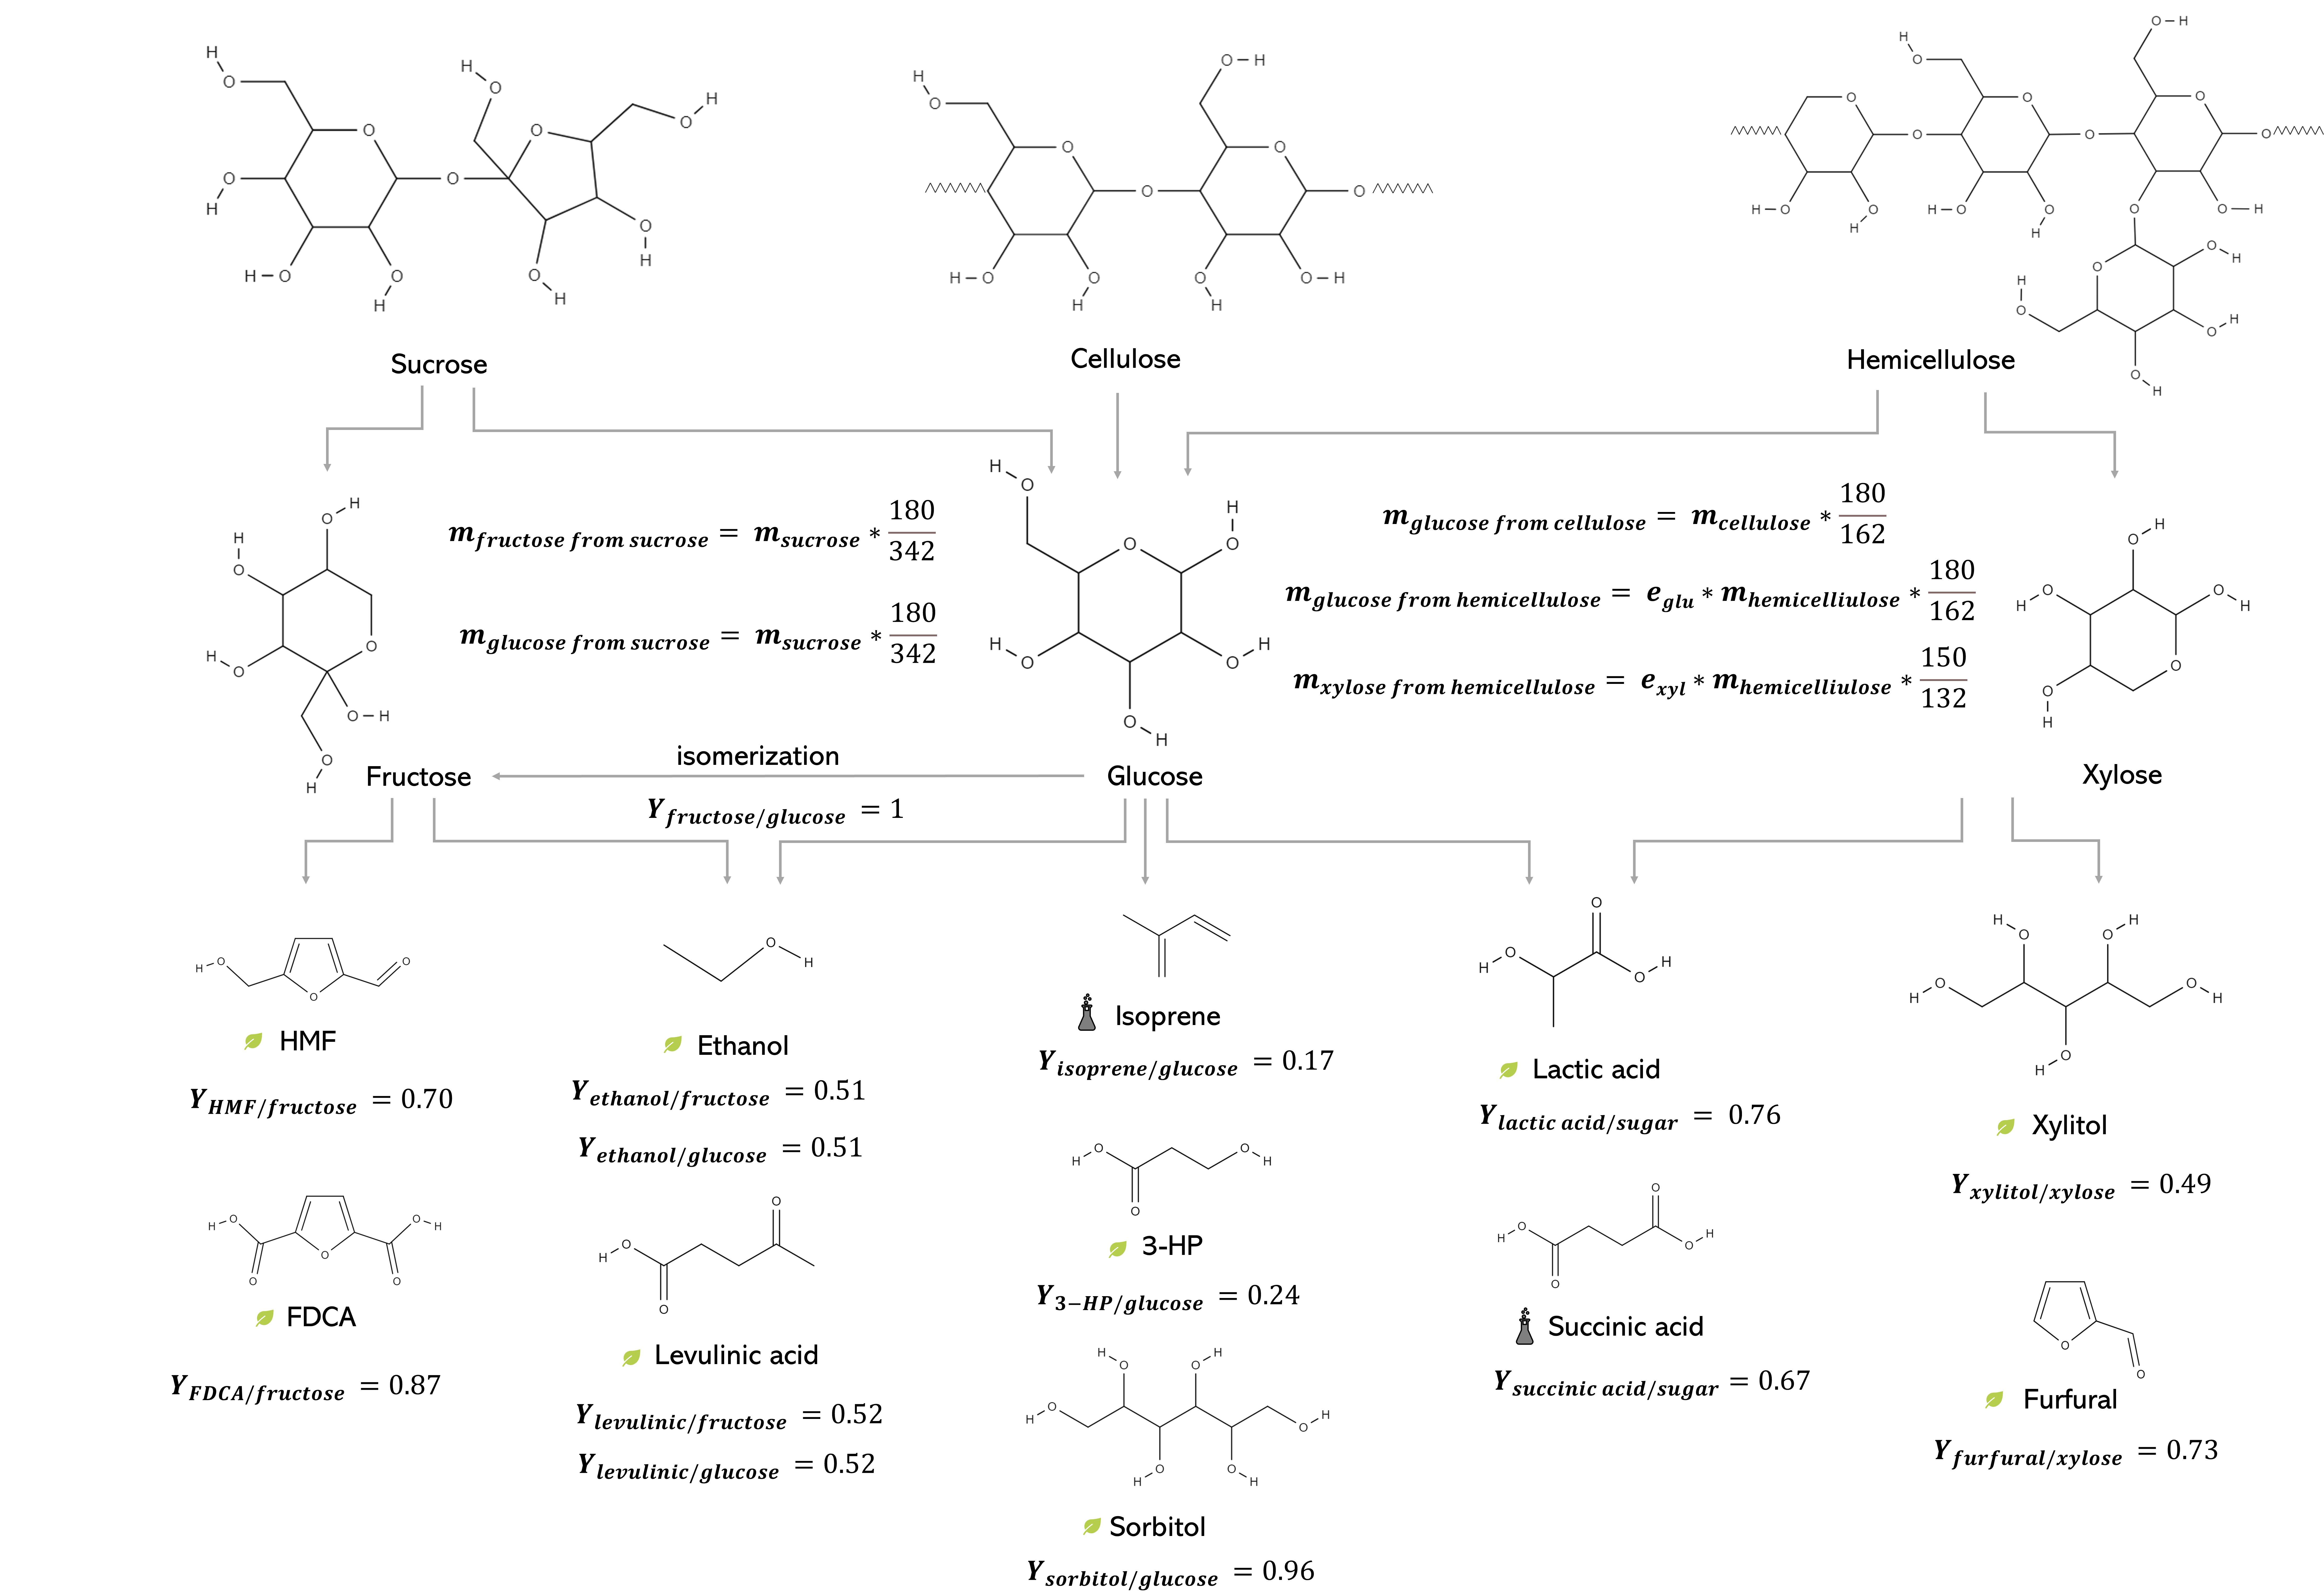


Figure S.4 The conversion of food loss and by-products to platform chemicals from composition perspective (result of literature review). The yield below each platform chemical is either theoretical yield or the average yield from current literature.

Table S.13 The counts of studies available on Scopus.

| Food loss and by-products | Ethanol | Furfural | HMF | FDCA | Isoprene | Succinic Acid | 3-HP | Levulinic Acid | Lactic acid | Sorbitol | Xylitol |
| --- | --- | --- | --- | --- | --- | --- | --- | --- | --- | --- | --- |
| corn | 2350 | 65 | 12 | 0 | 1 | 45 | 2 | 9 | 249 | 2 | 92 |
| corn germ | 11 | 0 | 0 | 0 | 0 | 0 | 0 | 0 | 0 | 0 | 0 |
| corn pericarp | 1 | 0 | 0 | 0 | 0 | 0 | 0 | 0 | 0 | 0 | 0 |
| Wheat grain | 383 | 2 | 2 | 0 | 0 | 12 | 1 | 3 | 70 | 0 | 2 |
| Wheat Bran | 82 | 2 | 2 | 0 | 0 | 5 | 0 | 0 | 46 | 0 | 22 |
| Wheat Germ | 1 | 0 | 0 | 0 | 0 | 0 | 0 | 0 | 9 | 0 | 0 |
| Whole Potato | 95 | 1 | 1 | 0 | 3 | 2 | 0 | 2 | 57 | 0 | 1 |
| Whole Tomato | 12 | 0 | 0 | 0 | 0 | 0 | 0 | 1 | 5 | 0 | 0 |
| Tomato Pomace | 1 | 0 | 0 | 0 | 0 | 0 | 0 | 0 | 4 | 0 | 0 |
| sugarcane | 2212 | 3 | 3 | 0 | 0 | 5 | 0 | 1 | 100 | 3 | 134 |
| sugarcane bagasse | 1121 | 42 | 9 | 0 | 0 | 22 | 0 | 14 | 63 | 1 | 144 |
| Molasses | 132 | 0 | 1 | 0 | 0 | 3 | 0 | 1 | 20 | 1 | 1 |
| Whole Beets | 160 | 0 | 2 | 1 | 0 | 1 | 1 | 1 | 2 | 1 | 1 |
| Beet pulp | 37 | 2 | 0 | 0 | 0 | 2 | 0 | 0 | 10 | 0 | 0 |
| Molasses | 46 | 0 | 1 | 0 | 0 | 1 | 0 | 1 | 16 | 1 | 0 |
| Rice grain | 177 | 0 | 11 | 2 | 1 | 4 | 0 | 0 | 0 | 1 | 0 |
| Rice hull | 25 | 14 | 3 | 0 | 0 | 1 | 0 | 5 | 7 | 0 | 3 |
| Rice bran | 30 | 0 | 0 | 0 | 0 | 0 | 0 | 0 | 18 | 0 | 14 |
| Apple | 74 | 0 | 0 | 0 | 0 | 3 | 0 | 0 | 8 | 1 | 6 |
| apple pomace | 17 | 0 | 1 | 0 | 0 | 2 | 0 | 0 | 6 | 0 | 0 |
| orange | 54 | 1 | 2 | 0 | 0 | 1 | 0 | 0 | 13 | 1 | 0 |
| orange peel | 35 | 1 | 0 | 0 | 0 | 4 | 0 | 2 | 9 | 0 | 0 |
| banana | 59 | 1 | 2 | 0 | 0 | 0 | 0 | 0 | 4 | 0 | 0 |
| banana peel | 32 | 0 | 3 | 0 | 0 | 0 | 0 | 0 | 5 | 0 | 4 |
| potato pulp | 4 | 0 | 0 | 1 | 0 | 0 | 0 | 0 | 0 | 0 | 0 |
| sweet potato | 94 | 0 | 0 | 0 | 0 | 0 | 0 | 0 | 10 | 0 | 0 |
| sweet potato pulp | 0 | 0 | 0 | 0 | 3 | 1 | 0 | 0 | 0 | 0 | 0 |
| barley | 171 | 0 | 0 | 0 | 0 | 1 | 0 | 1 | 0 | 0 | 5 |
| spent grain from beer | 40 | 0 | 1 | 0 | 0 | 0 | 0 | 0 | 18 | 0 | 10 |
| Rapeseed | 8 | 0 | 0 | 0 | 0 | 2 | 0 | 0 | 3 | 0 | 1 |
| Rapeseed meal | 9 | 0 | 0 | 0 | 0 | 2 | 0 | 0 | 3 | 0 | 0 |
| Total paper-ethanol | 7473 |  |  |  |  |  |  |  |  |  |  |
| Total paper-retrieved | 9046 |  |  |  |  |  |  |  |  |  |  |
| Percentage of ethanol study | 82.61% |  |  |  |  |  |  |  |  |  |  |

Table S.14 Yield of platform chemicals from each food loss and by-product stream (Unit: g Platform chemical/g Food loss and by-products) The detailed yield calculation can be found in the *Supplementary Excel 1,* sheet “*Yield_FLB_PC*”and *Supplementary Excel 2_Yield calculation*

| Food loss and by-products | Ethanol | Furfural | HMF | FDCA | Isoprene | Succinic Acid | 3-HP | Levulinic Acid | Lactic acid | Sorbitol | Xylitol |
| --- | --- | --- | --- | --- | --- | --- | --- | --- | --- | --- | --- |
| corn | 0,2761 | 0,0543 | 0,0567 | 0,0525 | 0,0204 | 0,2604 | 0,1191 | 0,2420 | 0,6441 | 0,4190 | 0,0327 |
| corn germ | 0,4039 | 0,0000 | 0,0584 | 0,0724 | 0,0142 | 0,0557 | 0,0584 | 0,0435 | 0,0634 | 0,0803 | 0,0000 |
| corn pericarp | 0,2074 | 0,0564 | 0,1899 | 0,2352 | 0,0461 | 0,2327 | 0,1899 | 0,1413 | 0,2651 | 0,2611 | 0,0377 |
| rice grain | 0,0704 | 0,0000 | 0,1982 | 0,3584 | 0,0703 | 0,2758 | 0,0978 | 0,2154 | 0,3141 | 0,3979 | 0,0000 |
| rice hull | 0,3309 | 0,0767 | 0,1351 | 0,1521 | 0,0298 | 0,1250 | 0,1250 | 0,1067 | 0,2479 | 0,1689 | 0,0607 |
| rice bran | 0,1680 | 0,0245 | 0,0694 | 0,0859 | 0,0141 | 0,0886 | 0,0196 | 0,0516 | 0,1413 | 0,0954 | 0,0164 |
| whole wheat | 0,1069 | 0,0148 | 0,2477 | 0,3068 | 0,0602 | 0,3691 | 0,0837 | 0,2022 | 0,4623 | 0,3406 | 0,0099 |
| wheat bran | 0,0758 | 0,0556 | 0,1219 | 0,1510 | 0,0296 | 0,1903 | 0,0412 | 0,0908 | 0,3028 | 0,1677 | 0,0699 |
| wheat germ | 0,2352 | 0,0000 | 0,1463 | 0,1812 | 0,0355 | 0,1672 | 0,0494 | 0,1089 | 0,1588 | 0,2012 | 0,0000 |
| sugarcane | 0,0989 | 0,0499 | 0,7070 | 0,1253 | 0,0184 | 0,1599 | 0,0235 | 0,0706 | 0,2640 | 0,1305 | 0,0206 |
| sugarcane bagasse | 0,0714 | 0,1618 | 0,1251 | 0,3071 | 0,0602 | 0,4938 | 0,0766 | 0,2381 | 0,4593 | 0,3119 | 0,0671 |
| sugarcane molasses | 0,0640 | 0,0000 | 0,1812 | 0,2412 | 0,0233 | 0,4127 | 0,0324 | 0,2793 | 0,4920 | 0,0596 | 0,0000 |
| sugar beet | 0,0745 | 0,0039 | 0,0429 | 0,0761 | 0,0079 | 0,0586 | 0,020774 | 0,0457 | 0,0354 | 0,0845 | 2,7E-05 |
| sugar beet pulp | 0,0535 | 0,0486 | 0,0501 | 0,1914 | 0,0295 | 0,3350 | 0,053364 | 0,1150 | 0,1252 | 0,2124 | 0,0024 |
| sugar beet molasses | 0,1209 | 0,0019 | 0,1948 | 0,1299 | 0,0180 | 0,0371 | 0,036066 | 0,0221 | 0,2049 | 0,1442 | 0,0013 |
| potato | 0,0205 | 0,0007 | 0,2750 | 0,0693 | 0,0133 | 0,1249 | 0,0185 | 0,0417 | 0,1154 | 0,0770 | 0,0005 |
| potato pulp | 0,0521 | 0,0008 | 0,0411 | 0,0509 | 0,0100 | 0,0398 | 0,0139 | 0,0306 | 0,0454 | 0,0565 | 0,0005 |
| tomato | 0,1035 | 0,0014 | 0,0060 | 0,0137 | 0,0012 | 0,0109 | 0,0017 | 0,0083 | 0,0426 | 0,0153 | 0,0002 |
| tomato pomace | 0,0529 | 0,0055 | 0,0058 | 0,0341 | 0,0053 | 0,0313 | 0,0073 | 0,0205 | 0,0145 | 0,0379 | 0,0037 |
| sweet potato | 0,0598 | 0,0010 | 0,0748 | 0,0926 | 0,0160 | 0,0722 | 0,0223 | 0,0557 | 0,1112 | 0,1029 | 0,0007 |
| sweet potato pulp | 0,2659 | 0,0015 | 0,0711 | 0,0880 | 0,0173 | 0,0691 | 0,0240 | 0,0529 | 0,0787 | 0,0977 | 0,0010 |
| apple | 0,0499 | 0,0001 | 0,0488 | 0,0604 | 0,0038 | 0,0466 | 0,0053 | 0,0363 | 0,0613 | 0,0671 | 0,0001 |
| apple pomace | 0,0680 | 0,0373 | 0,0419 | 0,2477 | 0,0319 | 0,2248 | 0,0444 | 0,1489 | 0,3559 | 0,2750 | 0,0249 |
| orange | 0,0554 | 0,0104 | 0,0308 | 0,0381 | 0,0036 | 0,0388 | 0,0050 | 0,0229 | 0,0442 | 0,0423 | 0,0069 |
| orange peel | 0,0819 | 0,0000 | 0,0552 | 0,0683 | 0,0089 | 0,1222 | 0,1220 | 0,0382 | 0,1180 | 0,0758 | 0,0000 |
| banana | 0,4963 | 0,0000 | 0,0573 | 0,0710 | 0,0073 | 0,0546 | 0,0101 | 0,0426 | 0,0622 | 0,0788 | 0,0000 |
| banana peel | 0,0107 | 0,0862 | 0,2522 | 0,1105 | 0,0217 | 0,1641 | 0,0302 | 0,0664 | 0,3996 | 0,1227 | 0,0359 |
| barley | 0,2162 | 0,0508 | 0,2509 | 0,3108 | 0,0154 | 0,2858 | 0,0841 | 0,1868 | 0,3255 | 0,3450 | 0,0340 |
| spent grains | 0,1200 | 0,0357 | 0,1042 | 0,1291 | 0,0061 | 0,0557 | 0,0347 | 0,0776 | 0,2676 | 0,1433 | 0,1893 |
| rapeseed | 0,0111 | 0,0184 | 0,0189 | 0,0234 | 0,0012 | 0,0349 | 0,0064 | 0,0141 | 0,0743 | 0,0260 | 0,0123 |
| rapeseed meal | 0,0396 | 0,0044 | 0,0542 | 0,0671 | 0,0173 | 0,1240 | 0,0183 | 0,0403 | 0,0000 | 0,0745 | 0,0030 |

Table S.15 Sugar composition of food loss and by-products

|  | Glucose [%] | Fructose [%] | Sucrose [%] | Cellulose [%] | Xylose [%] | Hemicellulose [%] | tot. Glucose [%] | tot. Fructose [%] | tot. Xylose [%] | tot. sugar [%] | Reference |
| --- | --- | --- | --- | --- | --- | --- | --- | --- | --- | --- | --- |
| Corn | 73,46 | 0,00 | 0,00 | 8,17 | 0,00 | 6,66 | 83,12 | 0,00 | 3,94 | 87,06 | 109–111 |
| Corn germ | 16,69 | 0,00 | 0,00 | 0,00 | 0,00 | 0,00 | 16,69 | 0,00 | 0,00 | 16,69 | 112,113 |
| Corn pericarp | 29,26 | 0,00 | 0,00 | 22,50 | 15,50 | 0,00 | 54,26 | 0,00 | 15,50 | 69,76 | 114 |
| Wheat grain | 68,33 | 0,00 | 0,00 | 2,20 | 0,00 | 5,25 | 70,78 | 0,00 | 4,06 | 74,83 | 112 |
| Wheat bran | 22,22 | 0,00 | 0,00 | 11,35 | 0,00 | 26,93 | 34,84 | 0,00 | 15,30 | 50,14 | 112 |
| Wheat Germ | 41,80 | 0,00 | 0,00 | 0,00 | 0,00 | 0,00 | 41,80 | 0,00 | 0,00 | 41,80 | 115 |
| Potato | 15,54 | 0,31 | 0,13 | 0,00 | 0,20 | 0,00 | 15,61 | 0,38 | 0,20 | 16,19 | 116 |
| Tomato | 1,04 | 1,67 | 0,09 | 0,00 | 0,00 | 0,67 | 1,47 | 1,72 | 0,09 | 3,27 | 112 |
| Tomato pomace | 1,36 | 1,67 | 0,00 | 3,04 | 0,00 | 2,66 | 6,21 | 1,67 | 1,51 | 9,38 | 112 |
| Sugarcane | 0,60 | 0,55 | 12,75 | 10,44 | 0,00 | 4,93 | 19,85 | 7,26 | 3,73 | 30,84 | 112 |
| Sugarcane bagasse | 0,70 | 0,00 | 0,00 | 54,87 | 0,00 | 16,52 | 64,81 | 0,00 | 12,51 | 77,32 | 112 |
| Sugarcane molasses | 11,90 | 12,80 | 29,40 | 0,00 | 0,00 | 0,00 | 27,37 | 28,27 | 0,00 | 55,65 | 116 |
| sugar beet | 0,04 | 0,02 | 15,62 | 0,94 | 0,00 | 0,05 | 9,32 | 8,24 | 0,01 | 17,57 | 112 |
| sugar beet pulp | 29,03 | 9,01 | 0,83 | 3,74 | 0,15 | 4,09 | 34,70 | 9,45 | 0,98 | 45,13 | 112 |
| sugar beet Molasses | 1,22 | 1,48 | 13,90 | 11,38 | 0,53 | 0,00 | 21,18 | 8,79 | 0,53 | 30,50 | 112 |
| rice grain | 82,67 | 0,00 | 0,00 | 0,00 | 0,00 | 0,00 | 82,67 | 0,00 | 0,00 | 82,67 | 116 |
| rice hull | 0,00 | 0,00 | 0,00 | 25,67 | 0,00 | 17,59 | 35,08 | 0,00 | 12,99 | 48,07 | 112 |
| Rice bran | 0,00 | 0,00 | 6,12 | 11,20 | 0,00 | 10,05 | 16,59 | 3,22 | 6,74 | 26,56 | 117–119 |
| Apple | 3,04 | 8,59 | 1,70 | 0,44 | 0,00 | 0,10 | 4,46 | 9,48 | 0,03 | 13,97 | 112,116 |
| apple pomace | 37,56 | 19,58 | 0,00 | 0,00 | 10,25 | 0,00 | 37,56 | 19,58 | 10,25 | 67,39 | 112 |
| orange | 2,02 | 2,36 | 4,19 | 0,00 | 2,85 | 0,00 | 4,23 | 4,57 | 2,85 | 11,64 | 112,116 |
| orange peel | 3,84 | 3,84 | 2,64 | 3,40 | 0,00 | 1,37 | 10,53 | 5,23 | 0,00 | 15,76 | 120 |
| banana | 7,46 | 6,70 | 2,10 | 0,00 | 0,00 | 0,00 | 8,57 | 7,81 | 0,00 | 16,37 | 116 |
| banana peel | 0,00 | 0,00 | 0,00 | 20,70 | 12,30 | 17,30 | 25,50 | 0,00 | 23,70 | 49,20 | 112 |
| potato pulp | 7,73 | 0,00 | 0,00 | 2,72 | 0,00 | 2,24 | 11,73 | 0,00 | 0,21 | 11,94 | 112 |
| sweet potato | 15,00 | 0,93 | 3,06 | 1,72 | 0,00 | 0,61 | 18,83 | 2,54 | 0,28 | 21,65 | 116 |
| sweet potato pulp | 17,10 | 0,00 | 0,00 | 2,49 | 0,00 | 0,88 | 20,30 | 0,00 | 0,40 | 20,70 | 121 |
| barley | 56,92 | 0,00 | 1,04 | 3,46 | 4,97 | 19,71 | 71,14 | 0,55 | 13,97 | 85,67 | 112,116 |
| spent grainsfrom beer | 7,85 | 0,36 | 0,10 | 13,11 | 3,50 | 13,83 | 29,37 | 0,41 | 9,82 | 39,60 | 112 |
| Rapeseed | 5,40 | 0,00 | 0,00 | 0,00 | 5,06 | 0,00 | 5,40 | 0,00 | 5,06 | 10,46 | 112,122 |
| Rapeseed meal | 9,20 | 0,00 | 0,00 | 4,46 | 0,00 | 2,67 | 15,49 | 0,00 | 1,22 | 16,71 | 123,124 |

# Linear programming

For the reproduction of the results, the code and input data are provided on GitHub.

Code: <https://github.com/weiyujun18/Food2Chemical/blob/main/LP_FLB_PC.ipynb>

Input data:

For China: <https://github.com/weiyujun18/Food2Chemical/blob/main/FL2CH_CN.xlsx>

For the EU: <https://github.com/weiyujun18/Food2Chemical/blob/main/FL2CH_EU.xlsx>

For the U.S.: <https://github.com/weiyujun18/Food2Chemical/blob/main/FL2CH_US.xlsx>

In addition, in the supplementary material file we provide the outputs of the model..

Linear programming code:

import pandas as pd

from pyomo.environ import *

# Read the excel file into a pandas DataFrame

file_name_FL2CH_EU = "C:\\Workspace\\Food_lost2Ch\\IO\\FL2CH_EU.xlsx"

# eta is yield

eta_df = pd.read_excel(file_name_FL2CH_EU, sheet_name = 'eta', index_col=0)

# FL is the qty of each Food loss or by-products stream

FL_df=pd.read_excel(file_name_FL2CH_EU, sheet_name = 'FL')

# CH is the demand qty of each platform chemical

CH_df=pd.read_excel(file_name_FL2CH_EU, sheet_name = 'CH')

# profit is the profit of each platform chemical

profit_df=pd.read_excel(file_name_FL2CH_EU, sheet_name = 'profit')

# GWP is the global warming potential saving of each platform chemical

GWP_df=pd.read_excel(file_name_FL2CH_EU, sheet_name = 'GWP')

# Convert the DataFrame to a dictionary

eta_dict = eta_df.to_dict(orient='index')

FL_dict = FL_df['Column1'].to_dict()

CH_dict = CH_df['Column1'].to_dict()

profit_dict = profit_df['Column1'].to_dict()

GWP_dict = GWP_df['Column1'].to_dict()

# Convert nested dictionary format for Pyomo

eta_dict = {(row, col): value for row, row_data in eta_dict.items() for col, value in row_data.items()}

FL_dict = {i+1: FL_dict[i] for i in FL_dict}

CH_dict = {i+1: CH_dict[i] for i in CH_dict}

profit_dict = {i+1: profit_dict[i] for i in profit_dict}

GWP_dict = {i+1: GWP_dict[i] for i in GWP_dict}

# Create a Concrete Model

model = ConcreteModel()

# Sets

model.I = RangeSet(1, 19) # for CN, (1, 22), for US (1, 13), for EU (1, 19)

model.J = RangeSet(1, 11)

# Parameters

model.FL = Param(model.I, initialize=FL_dict)

model.CH = Param(model.J, initialize=CH_dict)

model.eta = Param(model.I, model.J, initialize=eta_dict)

# #option 1: model profit

# model.profit = Param(model.J, initialize=profit_dict)

#option 2: model GWP

model.GWP = Param(model.J, initialize=GWP_dict)

# Variables

model.x = Var(model.I, within=NonNegativeReals)

model.y = Var(model.J, within=NonNegativeReals)

model.w = Var(model.I, model.J, within=NonNegativeReals) # w[i,j] indicate the FL[i] used to produce CH[j]

# # option 1: Objective function 1, profit

# def objective_rule(model):

#     return sum(model.y[j] * model.profit[j] for j in model.J)

# option 2: Objective function 2, GWP saving

def objective_rule(model):

    return sum(model.y[j] * model.GWP[j] for j in model.J)

model.obj = Objective(rule=objective_rule, sense=maximize)

# Constraints

def x_constraint_rule(model, i):

    return model.x[i] == sum(model.w[i, j] for j in model.J)

model.x_constraint = Constraint(model.I, rule=x_constraint_rule)

def y_constraint_rule(model, j):

    return model.y[j] == sum(model.w[i, j] * model.eta[i, j] for i in model.I)

model.y_constraint = Constraint(model.J, rule=y_constraint_rule)

def y_demand_constraint_rule(model, j):

    return model.y[j] <= model.CH[j]

model.y_demand_constraint = Constraint(model.J, rule=y_demand_constraint_rule)

def x_fleet_constraint_rule(model, i):

    return model.x[i] <= model.FL[i]

model.x_fleet_constraint = Constraint(model.I, rule=x_fleet_constraint_rule)

# To solve the model, you would typically use a solver

# Solve the model

solvername='glpk'

solverpath_folder='C:\Python311\winglpk\glpk-4.65\w64' #does not need to be directly on c drive

solverpath_exe='C:\Python311\winglpk\glpk-4.65\w64\glpsol.exe' #does not need to be directly on c drive

# solver = SolverFactory('glpk')

solver=SolverFactory(solvername,executable=solverpath_exe)

results = solver.solve(model)

# Display the results

model.display()

# Supplementary information for results

In our result, to achieve an optimal environmental performance, succinic acid, HMF, and lactic acid are the top three PC prioritized by the model and fully fulfilled across all three hotspot regions. The main FLB used for production of these PC are potato, sugarcane, and corn in China, sugar beet pulp, sugarcane, and sugarcane molasses in the U.S., potato and sugar beet in the EU. The yield and GWP saving are the main factors affecting the prioritization, and the reasons behind are analyzed. Succinic acid can be produced from both glucose and xylose with a relatively high theoretical maximum yield (1.12 g/g glucose)125, and the technology is quite mature. High yields, titers, and productivities have been achieved with several natural bacteria strains126. The GWP saving of FLB-based succinic acid is also high, because currently 99% of it is produced from fossil resource, resulting in a high GWP of around 8.3kg CO2-eq /kg fossil-based succinic acid72; in contrast, the GWP of bio-based pathway is only about 0.1372 to 1.378 kg CO2-eq/kg succinic acid, which is about 6 – 60 times lower than that of fossil-based succinic acid. For HMF, both cellulose and starch-rich FLB can be used as feedstock, and HMF can be simply produced by thermochemical conversion without any bioprocesses. There are only three steps needed: the hydrolysis of polysaccharides (e.g., cellulose, starch), the isomerization of glucose to fructose and the dehydration of fructose into HMF127. Besides, the GWP saving of HMF (8.03 kg CO2-eq/kg HMF) is the highest among the studied PC. Although HMF is currently produced only from biomass , the FLB-based production via heterogeneous catalyst-assisted thermochemical conversion has been found way more sustainable compared to the acid-catalyzed route widely used in industry75. For lactic acid, currently it is mostly produced from biomass using glucose and xylose as main substrates72,128, and about 10%84 of production is fossil-based via natural gas fermentation129. There are many studies on FLB-based lactic acid, second to FLB-based ethanol in terms of quantity. The yield of FLB-based lactic acid is highest in average compared to other studied PC, mainly due to its high technical maturity and efficiency. Regarding the GWP saving of lactic acid, the waste-derived lactic acid pathways (including from food waste) have a negative GWP ranging from −4.2 to −1.4 kg CO2-eq /kg lactic acid83, mainly due to the avoided business-as-usual scenarios, such as landfill; meanwhile, the GWP of fossil-based production is 7.5 CO2-eq/kg lactic acid and crop-based (e.g. corn or corn stover) production is around 0.27 CO2 eq/kg lactic acid72. Thus, the replacement of current lactic acid production by FLB-based lactic acid production would save around 3.79 CO2-eq/kg lactic acid.

According to the substrates required for the production of these PCs, the sugar content of FLB is the decisive factor for the feedstock matchmaking. From the outputs of model, the sugar rich FLB, such as sugar crops and their byproducts, potato and corn, are prioritized for the production of aforementioned PCs (i.e. succinic acid, HMF, and lactic acid). Another reason is that more studies are using these FLB as feedstock (Table S. 13), making the technology of using these FLB as feedstock more mature and the practical yield closer to the theoretical bioconversion yield. For the FLBs without any research to our current knowledge, we assume that the practical yield is 50% of the theoretical yield. It is unknown whether this assumption under- or over-estimates each lack-of-research FLB stream, but it is relatively easy to incorporate future research outcome into our model to recalculate the outcome. FLB like rice hull and banana peel may possess high potential for xylitol and furfural production with high yield due to their relative high xylose content; apple pomace and barley may possess high potential for glucose and fructose-derived chemical production such as lactic acid and succinic acid production, but these are currently overlooked in the research. We recommend prioritizing the trial of these FLB-PC pathways and their yields in future research.

Meanwhile, FDCA, levulinic acid, and furfural are not produced at all in the optimal environmental benefit scenario, indicating that the model does not allocate any FLB to these chemicals. This is because their GWP savings are 0 kg CO2-eq as determined by the GWP saving calculation decision tree (Figure S3). For these three chemicals, there is no study about the GWP of fossil-based production or reporting the GWP from non-FLB-based production. However, it is worth noting that the GWP of furfural production from biomass has been reported as negative73, meaning it reduces greenhouse gas emissions from the system by avoiding environment emission from the treatment of FLB (e.g. landfill and incineration). Despite furfural having a GWP saving of 0 kg CO2-eq per kiloton, its absolute contribution to the system is still beneficial.

In the economic optimal scenario, the local demand for all platform chemicals is fulfilled in China and EU, indicating that all production is profitable, and feedstocks are sufficient in these regions. However, in the U.S., only 21.2% of the ethanol demand is met, and isoprene is not produced at all. This suggests that FLB-based isoprene production is less profitable than FLB-based ethanol production, and the cost drivers of FLB-based isoprene are carbon source, titer, productivity or yield and the improvements in these directions130. Additionally, bio-based isoprene has not been commercialized yet, as its production depends on engineered microbial strains, and the overexpression of non-native genes can lead to intermediate imbalances and thus affects its yield and profitability131.

Our result also suggests that isoprene and succinic acid need to transition from currently fossil-based to future bio-based production to pursue a better enviromental performance. Technologically this is feasible and relatively mature; however, the substantially lower cost of fossil-based production hampers this transition, which may need interventions from public authorities to stimulte. For some chemicals, the transition from bio-based to FLB-based production also contribute a lot to environmental benefits, such as HMF and lactic acid. The difference of GWP between bio-based and FLB-based pathways is due to two reasons. One is the GWP from feedstock cultivation that is included in the bio-based pathways but not included in FLB-based pathways; the other reason is the studies about FLB-based pathway normally adopt innovative technology which usually has better environmental performance compared to widely used bio-based pathways, but these studies may also negelect the impact of the scalability of the technology in the future development.

**Main contributors of GWP saving of each region**

Analyzing the contribution of environmental benefits from each FLB to PC pathway reveals different key contributors in each region. In China, ethanol, isoprene, sorbitol, succinic acid, and lactic acid are the main contributors of enviromental benefits. However, the reasons for their significant contributions vary. Succinic acid and isoprene contribute primarily due to their high unit GWP saving. Ethanol and sorbitol, despite having relatively low unit GWP saving, contribute significantly due to their high quantities. Lactic acid’s contribution is attributed to its moderate unit GWP saving and medium market demand. For the U.S., ethanol, isoprene, and sorbitol are the main contributors. This is due to the high market demand for ethanol and sorbitol and the high unit GWP savings of isoprene. In the EU, ethanol, lactic acid, and sorbitol are the major contributors, primarily because of their high market demand in this region. Overall, in all regions, ethanol, sorbitol, and lactic acid should be considered priorities for future research due to their high demand. Additionally, isoprene, with its high unit GWP savings and substantial market demand, warrants increased attention in future studies.

# Scenario Analysis: Implications of Reducing Food Loss

According to Sustainable Development Goal (SDG) 12.3, the global community aims to “by 2030, halve per capita global food waste at the retail and consumer levels and reduce food losses along production and supply chains, including post-harvest losses.” Although no specific quantitative target has been set for food loss, we assume in this study that food loss will be reduced by 50% by 2030, and eventually eliminated in the coming decades. Based on this assumption, we explored the carbon and economic benefits under two hypothetical scenarios: 50% food loss reduction and complete elimination of food loss. To ensure comparability with our main analysis, we assumed that the production sizes of primary food crops and the demand for platform chemicals remain constant. Moreover, we maintained the same proportion of crops entering processing, meaning that with reduced upstream food loss, more raw food reaches the processing stage, which may increase the quantity of by-products generated.

Table S16. Quantities of food loss (FL) and food by-products (FB) under the baseline scenario (FLB quantities as used in this study), the 50% FL reduction scenario, and the 100% FL reduction scenario.

| Region | Type | Baseline | 50% FL reduction | 100% FL reduction |
| --- | --- | --- | --- | --- |
| CN | FL | 94,811.71 | 47,405.86 | 0.00 |
| FB | 156,471.50 | 159,858.85 | 163,246.20 |
| US | FL | 33,985.97 | 16,992.98 | 0.00 |
| FB | 43,187.80 | 43,915.76 | 44,643.72 |
| EU | FL | 61,500.19 | 30,750.10 | 0.00 |
| FB | 185,406.09 | 187,106.81 | 188,807.52 |


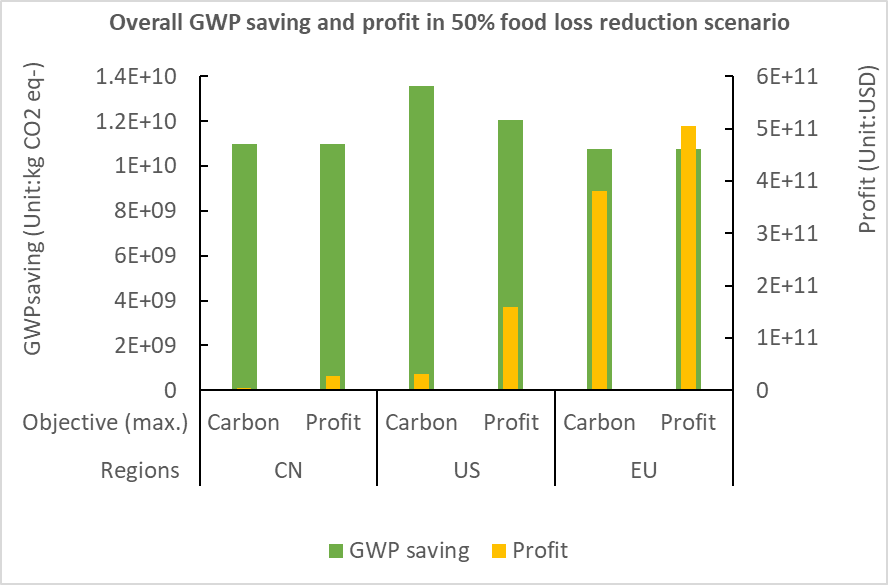

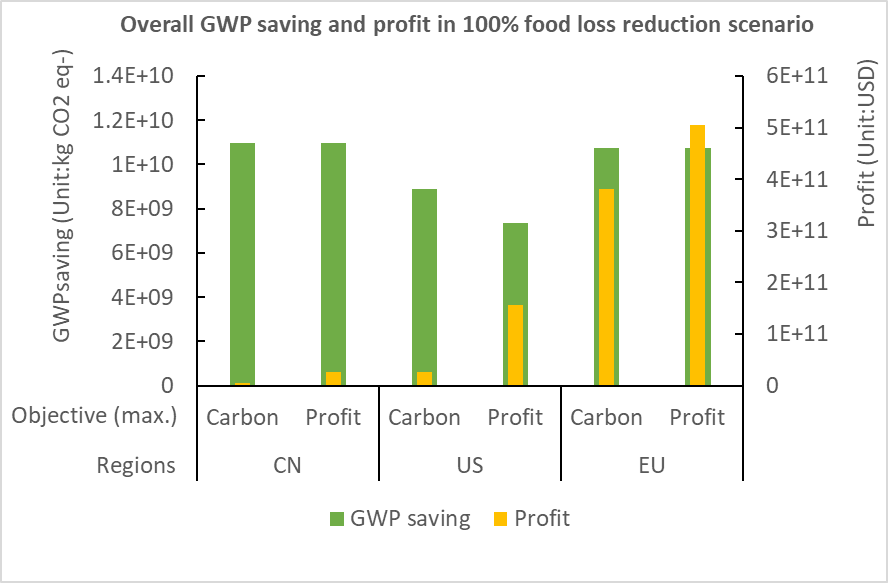


Figure S5. Overall GWP savings and profits under two objectives (optimal GWP saving and optimal profit) for 50% and 100% FL reduction scenarios.

The results show that, for China and the EU, under scenarios where food loss is halved or entirely eliminated, the remaining food loss and by-products are still sufficient to fully meet local PC demand. Consequently, the overall GWP savings and profits remain consistent with the current scenario. However, for the U.S., decreasing of food loss leads to a decrease in both GWP savings and profit. Specifically, a 50% reduction in food loss results in a 24.73% decrease in GWP savings under the carbon-optimized scenario, while the profit drops by 1.45% under the economically optimized scenario. With complete elimination of food loss, the GWP savings decline by 50.82%, and the profit is reduced by 2.99%.

Nevertheless, these findings should not be interpreted as a rationale to maintain the current levels of food loss for the sake of higher GWP savings or profits. This analysis does not account for the environmental and economic costs inherently associated with food loss itself, nor does it consider the GWP and financial inputs required to manage and dispose of food loss. Therefore, food loss mitigation remains a critical and necessary objective, and our results should be understood within the broader context of sustainability and system-wide optimization.

For the reproduction of the results, the input data are provided on GitHub.

Input data: <https://github.com/weiyujun18/Food2Chemical>

Data file name: *FL2CH_CN_50%.xlsx*; *FL2CH_CN_100%.xlsx*; *FL2CH_US_50%.xlsx*; *FL2CH_US_100%.xlsx*; *FL2CH_EU_50%.xlsx*; *FL2CH_EU_100%.xlsx*

Note: The file name with 50% means 50% FL reduction; The file name with 100% means complete elimination of food loss

# Sensitivity analysis

Due to uncertainties in FLB availability, composition, and conversion yields, sensitivity analyses were conducted for each parameter. For FLB quantity, three scenarios were defined: 80% (low), 100% (base), and 120% (high) of the estimated values in this study. Regarding composition, the analysis is based on the fraction of fermentable sugars in FLB. Variations in fermentable sugar content effectively translate into proportional changes in available FLB quantity (e.g., a ±20% change in sugar content is equivalent to a ±20% change in FLB availability). Therefore, composition uncertainty is inherently captured within the FLB quantity sensitivity analysis and is not assessed separately. For yield, three analogous scenarios were established: 80% (low), 100% (base), and 120% (high) of the estimated yields.

Table S17. Sensitivity analysis of FLB quantity and yield on economic and environmental outcomes across regions.

| Region | Scenario | Optimal environment | | Optimal economic | |
| --- | --- | --- | --- | --- | --- |
| GWP saving | Profit | GWP saving | Profit |
| China | FLB_80% | 1.10E+10 | 4.98E+09 | 1.1E+10 | 2.71E+10 |
| FLB_100% | 1.10E+10 | 4.98E+09 | 1.1E+10 | 2.71E+10 |
| FLB_120% | 1.10E+10 | 4.98E+09 | 1.1E+10 | 2.71E+10 |
| Yield_80% | 1.10E+10 | 4.98E+09 | 1.1E+10 | 2.71E+10 |
| Yield_100% | 1.10E+10 | 4.98E+09 | 1.1E+10 | 2.71E+10 |
| Yield_120% | 1.10E+10 | 4.98E+09 | 1.1E+10 | 2.71E+10 |
| The EU | FLB_80% | 1.08E+10 | 3.80E+11 | 1.08E+10 | 5.05E+11 |
| FLB_100% | 1.08E+10 | 3.80E+11 | 1.08E+10 | 5.05E+11 |
| FLB_120% | 1.08E+10 | 3.80E+11 | 1.08E+10 | 5.05E+11 |
| Yield_80% | 1.08E+10 | 3.80E+11 | 1.08E+10 | 5.05E+11 |
| Yield_100% | 1.08E+10 | 3.80E+11 | 1.08E+10 | 5.05E+11 |
| Yield_120% | 1.08E+10 | 3.80E+11 | 1.08E+10 | 5.05E+11 |
| The U.S. | FLB_80% | 1.5E+10 | 2.93E+10 | 1.35E+10 | 1.6E+11 |
| FLB_100% | 1.81E+10 | 3.37E+10 | 1.65E+10 | 1.62E+11 |
| FLB_120% | 2.11E+10 | 3.53E+10 | 1.96E+10 | 1.63E+11 |
| Yield_80% | 1.5E+10 | 2.93E+10 | 1.35E+10 | 1.6E+11 |
| Yield_100% | 1.81E+10 | 3.37E+10 | 1.65E+10 | 1.62E+11 |
| Yield_120% | 2.11E+10 | 3.53E+10 | 1.96E+10 | 1.63E+11 |

The results of the sensitivity analysis are presented in Table S17. The findings indicate that variations in either yield or FLB quantity do not alter the overall economic and environmental benefits for China and the EU (27), although the allocation and utilization of FLB streams shift, with preferred feedstocks being prioritized under all scenarios.

In contrast, for the U.S., both economic and environmental benefits vary with changes in yield and FLB quantity. This is because local FLB resources are insufficient to meet the total demand for platform chemicals. Even when FLB availability is increased to 120%, the demand for all PCs cannot be fully satisfied. Consequently, increases or decreases in yield and FLB quantity lead to corresponding changes in overall economic and environmental performance. Table S18 summarizes the percentage changes in total economic and environmental benefits under ±20% variations in FLB quantity and yield for the U.S.. Detailed allocation results are provided in “*Supplementary Excel_LP_result*”.

Table S18. Percentage changes in economic and environmental benefits in the U.S. under ±20% variations in FLB quantity and yield.

| Scenario | Optimal environment | | | | Optimal economic | | | |
| --- | --- | --- | --- | --- | --- | --- | --- | --- |
| GWP saving | Changes (in %) | Profit | Changes (in %) | GWP saving | Changes (in %) | Profit | Changes (in %) |
| FLB_80% | 1.50E+10 | -17.14% | 2.93E+10 | -12.83% | 1.35E+10 | -18.53% | 1.60E+11 | -1.00% |
| FLB_100% | 1.81E+10 | Baseline | 3.37E+10 | Baseline | 1.65E+10 | Baseline | 1.62E+11 | Baseline |
| FLB_120% | 2.11E+10 | 16.96% | 3.53E+10 | 4.79% | 1.96E+10 | 18.53% | 1.63E+11 | 1.00% |
| Yield_80% | 1.50E+10 | -17.14% | 2.93E+10 | -12.83% | 1.35E+10 | -18.53% | 1.60E+11 | -1.00% |
| Yield_100% | 1.81E+10 | Baseline | 3.37E+10 | Baseline | 1.65E+10 | Baseline | 1.62E+11 | Baseline |
| Yield_120% | 2.11E+10 | 16.96% | 3.53E+10 | 4.79% | 1.96E+10 | 18.53% | 1.63E+11 | 1.00% |

# Reference

1. Werpy, T. & Petersen, G. *Top Value Added Chemicals from Biomass: Volume I -- Results of Screening for Potential Candidates from Sugars and Synthesis Gas*. https://www.osti.gov/biblio/15008859 (2004) doi:10.2172/15008859.

2. J. Bozell, J. & R. Petersen, G. Technology development for the production of biobased products from biorefinery carbohydrates—the US Department of Energy’s “Top 10” revisited. *Green Chem.* **12**, 539–554 (2010).

3. Lu, N. & Rice, R. W. Demand Drivers and Price Supports for Bioethanol Use as Fuel in the United States: A Brief Review. *For. Prod. J.* **60**, 126–132 (2010).

4. Ministry of Commerce of the People’s Republic of China. Sorbitol market overview. https://finance.sina.cn/sa/2005-06-17/detail-ikknscsi2329018.d.html (2005).

5. Top ethanol producing countries worldwide 2023. *Statista* https://www.statista.com/statistics/281606/ethanol-production-in-selected-countries/.

6. S&P Global. Furfural | Chemical Economics Handbook. https://www.spglobal.com/commodityinsights/en/ci/products/furfural-chemical-economics-handbook.html.

7. Precision Reports. Global 5 Hydroxymethylfurfural (5-HMF) Market – Industry Reports. https://www.precisionreports.co/global-5-hydroxymethylfurfural-5-hmf-market-21062314 (2022).

8. Grand View Research. Furandicarboxylic Acid Market Size & Share Report, 2030. https://www.grandviewresearch.com/industry-analysis/fdca-industry (2023).

9. S&P Global. Glycerin | Chemical Economics Handbook. *S&P Global* https://www.spglobal.com/commodityinsights/en/ci/products/glycerin-chemical-economics-handbook.html (2021).

10. S&P Global. Isoprene | Chemical Economics Handbook. https://www.spglobal.com/commodityinsights/en/ci/products/isoprene-chemical-economics-handbook.html (2023).

11. INKWOOD RESEARCH. NORTH AMERICA SUCCINIC ACID MARKET FORECAST 2017-2026. https://inkwoodresearch.com/reports/north-america-succinic-acid-market/#report-summary (2016).

12. INKWOOD RESEARCH. ASIA PACIFIC SUCCINIC ACID MARKET FORECAST 2017-2026. https://inkwoodresearch.com/reports/asia-pacific-succinic-acid-market/ (2016).

13. INKWOOD RESEARCH. NORTH AMERICA SUCCINIC ACID MARKET FORECAST 2017-2026. *Inkwood Research* https://www.inkwoodresearch.com/reports/north-america-succinic-acid-market/ (2016).

14. MarketsandMarkets. Succinic Acid Market by Type, End-Use Industry & Geography | COVID-19 Impact Analysis. https://www.marketsandmarkets.com/Market-Reports/succinic-acid-market-402.html.

15. Report Prime. Global 3-hydroxypropionic Acid Market Size was USD 2.00 Million in 2022, this report covers Market growth, trend, opportunity and forecast 2023-2030. https://www.reportprime.com/3-hydroxypropionic-acid-r655 (2023).

16. Polaris Market Research. Levulinic Acid Market Share, Size, Trends, Industry Analysis Report, By Technology (Biofine, Acid Hydrolysis); By End-Use (Agricultural, Medical and Healthcare, Personal Care, Petrochemical, Others); By Application; By Region; Segment Forecast, 2022 - 2030. https://www.polarismarketresearch.com/industry-analysis/levulinic-acid-market (2022).

17. OEC. Lactic acid, its salt & esters. https://oec.world/en/profile/hs/lactic-acid-its-salts-esters (2021).

18. IndustryARC. Sorbitol Report – Forecast (2022-2027). https://www.industryarc.com/Report/17768/sorbitol-market.html (2021).

19. Coherent Market Insights. XYLITOL MARKET ANALYSIS. https://www.coherentmarketinsights.com/market-insight/xylitol-market-5484 (2023).

20. Eseyin, A., E. & Steele, P., H. An overview of the applications of furfural and its derivatives. *Int. J. Adv. Chem.* **3**, 42 (2015).

21. de Jong, E., Stichnothe, H., Bell, G. & Jørgensen, H. *Bio-Based Chemicals A 2020 Update*. (2020).

22. Statista. Market volume of isoprene in the United States from 2014 to 2025, by product. https://www.statista.com/statistics/799027/us-isoprene-market-volume-by-product/ (2017).

23. Ahn, J. H., Jang, Y. S. & Lee, S. Y. Production of succinic acid by metabolically engineered microorganisms. *Curr. Opin. Biotechnol.* **42**, 54–66 (2016).

24. Rahman, D. A., Harahap, A. F. P. & Gozan, M. Techno-economic evaluation of integrated levulinic acid, formic acid, and furfural plant from oil palm empty fruit bunch with pre-treatment variations. *E-J. Menara Perkeb.* **90**, (2022).

25. Statista. Market volume of lactic acid worldwide from 2015 to 2022, with a forecast for 2023 to 2030. Market volume of lactic acid worldwide from 2015 to 2022, with a forecast for 2023 to 2030 (2023).

26. Ochoa-Gómez, J. R. & Roncal, T. Production of Sorbitol from Production of Sorbitol from Biomass. in.

27. Vardhan, H., Sasamal, S. & Mohanty, K. Fermentation process optimisation based on ANN and RSM for xylitol production from areca nut husk followed by xylitol crystal characterisation. *Process Biochem.* **122**, 146–159 (2022).

28. Gatto, A. & Chepeliev, M. Global food loss and waste estimates show increasing nutritional and environmental pressures. *Nat. Food* **5**, 136–147 (2024).

29. FAO. Food Balances (2010-). https://www.fao.org/faostat/en/#data/FBS (2020).

30. LeadLeo. 2021 China Isoprene Industry overview. (2021).

31. Eurostat. Statistics on the production of manufactured goods. https://ec.europa.eu/eurostat/databrowser/view/ds-056121/legacyMultiFreq/table?lang=en&category=prom (2020).

32. Luo, Y., Huang, D. & Wu, L. On-farm post-harvest loss and loss reduction methods: evidence from China. *Int. J. Agric. Sustain.* **20**, 1322–1332 (2022).

33. Xue, L. *et al.* China’s food loss and waste embodies increasing environmental impacts. *Nat. Food 2021 27* **2**, 519–528 (2021).

34. Lu, S. *et al.* Quantifying supply chain food loss in China with primary data: A large-scale, field-survey based analysis for staple food, vegetables, and fruits. *Resour. Conserv. Recycl.* **177**, 106006 (2022).

35. Riza, F. V. & Rahman, I. A. 17 - The properties of compressed earth-based (CEB) masonry blocks. in *Eco-Efficient Masonry Bricks and Blocks* (eds Pacheco-Torgal, F., Lourenço, P. B., Labrincha, J. A., Kumar, S. & Chindaprasirt, P.) 379–392 (Woodhead Publishing, Oxford, 2015). doi:10.1016/B978-1-78242-305-8.00017-6.

36. Ijaz, U. *et al.* Chapter 1 - Rice bran composition and its emerging potential applications. in *Green Sustainable Process for Chemical and Environmental Engineering and Science* (eds Inamuddin, Boddula, R. & Asiri, A. M.) 1–16 (Elsevier, 2021). doi:10.1016/B978-0-12-821886-0.00001-4.

37. Cui, S. W., Wu, Y. & Ding, H. 5 - The range of dietary fibre ingredients and a comparison of their technical functionality. in *Fibre-Rich and Wholegrain Foods* (eds Delcour, J. A. & Poutanen, K.) 96–119 (Woodhead Publishing, 2013). doi:10.1533/9780857095787.1.96.

38. Piano, R. Unlock the Benefits: Wheat Germ Nutritional Value and Health Perks. *Il Blog di Agricola Piano, Ricette facili e Veloci e News sul Mondo Gastronomico* https://www.agricolapiano.com/blogpiano/live-wheat-germ-discover-the-nutritional-richness-and-extraordinary-benefits/?lang=en (2023).

39. Ministry of Agriculture and Rural Affairs of the People’s Republic of China. http://english.moa.gov.cn/datastatistics/202304/t20230423_301115.html.

40. A. Mena. The utilization of sugar cane by-products as substitutes for cereal in animal feed. https://www.fao.org/4/X6930E/X6930E07.htm.

41. Analysis of China’s potato market size and downstream consumption applications in 2022. https://www.askci.com/news/chanye/20220126/1718521737010.shtml.

42. Analysis of the current status and competition of China’s potato starch industry in 2023. https://www.chyxx.com/industry/1162936.html.

43. How many potatoes are needed to get 1 ton of potato starch? *starch processing machine* http://www.starchprojectsolution.com/faq/potato_and_potato_starch_processing_ratio_1460.html.

44. Current status of global tomato industry: China’s tomato production still lags far behind that of foreign countries. *Zhihu* https://zhuanlan.zhihu.com/p/465243127.

45. Rodríguez-Azúa, R. *et al.* Effect of Tomato Industrial Processing (Different Hybrids, Paste, and Pomace) on Inhibition of Platelet Function In Vitro, Ex Vivo, and In Vivo. *J. Med. Food* **17**, 505–511 (2014).

46. Liadakis, G., Kekes, T., Frakolaki, G., Giannou, V. & Tzia, C. CHAPTER FOUR - Ingredients for food products. in *Tomato Processing by-Products* (eds Jeguirim, M. & Zorpas, A.) 117–148 (Academic Press, 2022). doi:10.1016/B978-0-12-822866-1.00007-7.

47. Study on the current situation and market prospects of sweet potato industry. https://baijiahao.baidu.com/s?id=1715559749468284736&wfr=spider&for=pc.

48. Information Center, Ministry of Agriculture and Rural Affairs, PRC. *2018 Apple Big Data Development and Application Report*. 149–150 http://www.moa.gov.cn/gflt/201811/P020181114582004479062.pdf (2018).

49. Apple juice concentration and clarification processing technology. *Foodmate* https://m.foodmate.net/index.php?moduleid=24&itemid=128901.

50. Vidović, S. *et al.* Chapter 2 - Apple. in *Valorization of Fruit Processing By-products* (ed. Galanakis, C. M.) 17–42 (Academic Press, 2020). doi:10.1016/B978-0-12-817106-6.00002-2.

51. Ministry of Agriculture and Rural Affairs, PRC. Development planning for citrus advantage areas. http://www.moa.gov.cn/xw/zwdt/200305/t20030527_86398.htm.

52. Manjarres-Pinzon, K., Cortes-Rodriguez, M. & Rodríguez-Sandoval, E. Effect of drying conditions on the physical properties of impregnated orange peel. *Braz. J. Chem. Eng.* **30**, 667–676 (2013).

53. Liu, Pan. Analysis of global and Chinese banana industry production, consumption, import and export, and price trends in 2023. *Huaon.com* https://www.huaon.com/channel/trend/912398.html.

54. Amini Khoozani, A., Birch, J. & Bekhit, A. E.-D. A. Production, application and health effects of banana pulp and peel flour in the food industry. *J. Food Sci. Technol.* **56**, 548–559 (2019).

55. Jaglo, Kirsten, Kenny, Shannon, & Stephenson, Jenny. *From Farm to Kitchen: The Environmental Impacts of U.S. Food Waste*. https://www.epa.gov/system/files/documents/2021-11/from-farm-to-kitchen-the-environmental-impacts-of-u.s.-food-waste_508-tagged.pdf (2021).

56. Dong, W. *et al.* A framework to quantify mass flow and assess food loss and waste in the US food supply chain. *Commun. Earth Environ.* **3**, 1–11 (2022).

57. A third of U.S.-grown potatoes become frozen french fries used mostly by food service. http://www.ers.usda.gov/data-products/chart-gallery/gallery/chart-detail/?chartId=99117.

58. Somsen, Derk. *Production Yield Analysis in Food Processing: Applications in the French-Fries and the Poultry-Processing Industries*. (2004).

59. FAO. *Sugar Beet White Sugar*. https://www.fao.org/fileadmin/user_upload/tci/docs/AH1-(eng)Sugar%20beet%20white%20sugar.pdf (2009).

60. De, L. V., Patinha, C. C., Biganzoli, F. & Sala, S. Building a balancing system for food waste accounting at national level. *JRC Publications Repository* https://publications.jrc.ec.europa.eu/repository/handle/JRC124446 (2021) doi:10.2760/316306.

61. Eurostat. Prodcom - statistics by product. https://ec.europa.eu/eurostat/databrowser/view/ds-056121/legacyMultiFreq/table?lang=en&category=prom.

62. European Commission. European Commission | Agri-food data portal | Sugar. https://agridata.ec.europa.eu/extensions/DataPortal/sugar.html.

63. Corona, L., Owens, F. N. & Zinn, R. A. Impact of corn vitreousness and processing on site and extent of digestion by feedlot cattle. *J. Anim. Sci.* **84**, 3020–3031 (2006).

64. Zilic, S., Milasinovic, M., Terzic, D., Barac, M. & Ignjatovic-Micic, D. Grain characteristics and composition of maize specialty hybrids. *Span. J. Agric. Res.* **9**, 230–241 (2011).

65. How to Brew Beer Using All Grain Method (with Pictures) - wikiHow Life. https://www.wikihow.life/Brew-Beer-Using-All-Grain-Method.

66. Thiago, R. D. S. M., Pedro, P. M. D. M. & Eliana, F. C. S. Solid wastes in brewing process: A review. *J. Brew. Distill.* **5**, 1–9 (2014).

67. Lukinac, J. & Jukić, M. Barley in the Production of Cereal-Based Products. *Plants* **11**, 3519 (2022).

68. Neylon, E. *et al.* Rootlets, a Malting By-Product with Great Potential. *Fermentation* **6**, 117 (2020).

69. Muñoz, I. *et al.* Life cycle assessment of bio-based ethanol produced from different agricultural feedstocks. *Int. J. Life Cycle Assess.* **19**, 109–119 (2014).

70. Zhao, Y., Damgaard, A., Xu, Y., Liu, S. & Christensen, T. H. Bioethanol from corn stover – Global warming footprint of alternative biotechnologies. *Appl. Energy* **247**, 237–253 (2019).

71. Golden, Jay S., Pascual-Gonzalez, Janire, Aguilar-Mogas, Antoni, Paynter, Sharon R., & Radich, Anthony F. Indicators of the U.S. Biobased Economy, 2018. https://www.usda.gov/sites/default/files/documents/USDA-BIOINDICATORS-2018.pdf (2018).

72. Liang, C., Gracida-Alvarez, U. R., Hawkins, T. R. & Dunn, J. B. Life-Cycle Assessment of Biochemicals with Clear Near-Term Market Potential. *ACS Sustain. Chem. Eng.* **11**, 2773–2783 (2023).

73. Hong, J., Zhou, J. & Hong, J. Environmental and economic impact of furfuralcohol production using corncob as a raw material. *Int. J. Life Cycle Assess.* **20**, 623–631 (2015).

74. Kim, H., Baek, S. & Won, W. Integrative technical, economic, and environmental sustainability analysis for the development process of biomass-derived 2,5-furandicarboxylic acid. *Renew. Sustain. Energy Rev.* **157**, 112059 (2022).

75. Parshetti, G. K., Suryadharma, M. S., Pham, T. P. T., Mahmood, R. & Balasubramanian, R. Heterogeneous catalyst-assisted thermochemical conversion of food waste biomass into 5-hydroxymethylfurfural. *Bioresour. Technol.* **178**, 19–27 (2015).

76. Batten, R., Karanjikar, M. & Spatari, S. Bio-Based Polyisoprene Can Mitigate Climate Change and Deforestation in Expanding Rubber Production. *Fermentation* **7**, 204 (2021).

77. Wang, S. *et al.* Production of isoprene, one of the high-density fuel precursors, from peanut hull using the high-efficient lignin-removal pretreatment method. *Biotechnol. Biofuels* **10**, 297 (2017).

78. Gadkari, S., Kumar, D., Qin, Z., Ki Lin, C. S. & Kumar, V. Life cycle analysis of fermentative production of succinic acid from bread waste. *Waste Manag.* **126**, 861–871 (2021).

79. Bhagwat, S. S. *et al.* Sustainable Production of Acrylic Acid via 3-Hydroxypropionic Acid from Lignocellulosic Biomass. *ACS Sustain. Chem. Eng.* **9**, 16659–16669 (2021).

80. Krauter, H., Willke, T. & Vorlop, K.-D. Production of high amounts of 3-hydroxypropionaldehyde from glycerol by *Lactobacillus reuteri* with strongly increased biocatalyst lifetime and productivity. *New Biotechnol.* **29**, 211–217 (2012).

81. Hafyan, R. H. *et al.* Sustainability assessment of levulinic acid and succinic acid production from empty fruit bunch. *IOP Conf. Ser. Mater. Sci. Eng.* **778**, 012140 (2020).

82. Kumar, A., Shende, D. Z. & Wasewar, K. L. Production of levulinic acid: A promising building block material for pharmaceutical and food industry. *Mater. Today Proc.* **29**, 790–793 (2020).

83. Lee, U. *et al.* Life cycle analysis of renewable natural gas and lactic acid production from waste feedstocks. *J. Clean. Prod.* **311**, 127653 (2021).

84. Alexandri, M., Schneider, R., Mehlmann, K. & Venus, J. Recent Advances in d-Lactic Acid Production from Renewable Resources: Case Studies on Agro-Industrial Waste Streams. *Food Technol. Biotechnol.* **57**, 293 (2019).

85. Akmalina, R. Environmental Impacts Evaluation of Sorbitol Production from Glucose. *Eksergi* **16**, 7–12 (2019).

86. Moreno, J. *et al.* Life-cycle sustainability of biomass-derived sorbitol: Proposing technological alternatives for improving the environmental profile of a bio-refinery platform molecule. *J. Clean. Prod.* **250**, 119568 (2020).

87. PubChem. Sorbitol. https://pubchem.ncbi.nlm.nih.gov/compound/5780.

88. XIVIA. XIVIA White Paper | Sustainable and substantiated | For more sustainable, healthier products. https://earthshiftglobal.com/client_media/files/pdf/lca-environmental-footprinting-xivia-danisco-ESG-whitepaper.pdf.

89. Shaji, A., Shastri, Y., Kumar, V., Ranade, V. V. & Hindle, N. Sugarcane bagasse valorization to xylitol: Techno-economic and life cycle assessment. *Biofuels Bioprod. Biorefining* **16**, 1214–1226 (2022).

90. Indexbox. U.S. - Ethyl Alcohol - Market Analysis, Forecast, Size, Trends and Insights. https://www.indexbox.io/search/ethanol-price-the-united-states/ (2024).

91. ECHEMI. Market Price & Insight. https://www.echemi.com/weekly-price-list.html?keywords=ethanol.

92. Irwin, S. Ethanol Production Profits in 2021: What a Ride! *Farmdoc Dly.* **12**, (2022).

93. Gómez Millán, G., Bangalore Ashok, R. P., Oinas, P., Llorca, J. & Sixta, H. Furfural production from xylose and birch hydrolysate liquor in a biphasic system and techno-economic analysis. *Biomass Convers. Biorefinery* **11**, 2095–2106 (2021).

94. Maitra, S. & Singh, V. A consolidated bioprocess design to produce multiple high-value platform chemicals from lignocellulosic biomass and its technoeconomic feasibility. *J. Clean. Prod.* **377**, 134383 (2022).

95. de Jong, Ed. New developments on PEF and Avantium’s flagship factory. (2024).

96. Intratec. Isoprene Prices | Historical and Current. *Intratec.us* https://www.intratec.us/chemical-markets/isoprene-price.

97. Mckinseywell. Europe isoprene market 2023-2030. https://mckinseywell.com/products/europe-isoprene-market-2023-2030.

98. Zeikus, J. G., Jain, M. K. & Elankovan, P. Biotechnology of succinic acid production and markets for derived industrial products. *Appl. Microbiol. Biotechnol.* **51**, 545–552 (1999).

99. Levulinic acid production from furfural: process development and techno-economics. *Green Chem.* **24**, 3326–3343 (2022).

100. Techno-Economic Analysis of Bio-Based Lactic Acid Production Utilizing Corn Grain as Feedstock. https://www.mdpi.com/2227-9717/8/2/199.

101. Kumar, Ganesh. Sorbitol Prices Trend: During the Quarter Ending September 2023 | ChemAnalyst. https://www.linkedin.com/pulse/sorbitol-prices-trend-during-quarter-ending-september-kumar-gupta-lp8tc.

102. Galán, G., Martín, M. & Grossmann, I. E. Integrated Renewable Production of Sorbitol and Xylitol from Switchgrass. *Ind. Eng. Chem. Res.* **60**, 5558–5573 (2021).

103. Jedwards. Xylitol - Non-GMO. https://bulknaturaloils.com/xylitol-non-gmo-g1210.html.

104. Ravella, S. R., Gallagher, J., Fish, S. & Prakasham, R. S. Overview on Commercial Production of Xylitol, Economic Analysis and Market Trends. in *D-Xylitol: Fermentative Production, Application and Commercialization* (eds da Silva, S. S. & Chandel, A. K.) 291–306 (Springer, Berlin, Heidelberg, 2012). doi:10.1007/978-3-642-31887-0_13.

105. ChemicalBook. *ChemicalBook* https://www.chemicalbook.com/.

106. ChemAnalyst. https://www.chemanalyst.com/.

107. 1688. https://www.1688.com/.

108. Merck. https://www.sigmaaldrich.com/NL/en.

109. Singh, N., Kaur, A. & Shevkani, K. Maize: Grain Structure, Composition, Milling, and Starch Characteristics. in *Maize: Nutrition Dynamics and Novel Uses* (eds Chaudhary, D. P., Kumar, S. & Langyan, S.) 65–76 (Springer India, New Delhi, 2014). doi:10.1007/978-81-322-1623-0_5.

110. Basalan, M., *et al.* Corn maturation: changes in the grain and cob. *1995 Anim. Sci. Res. Rep.* 92–98 (1995).

111. Sánchez, C., Serrano, L., Andres, M. A. & Labidi, J. Furfural production from corn cobs autohydrolysis liquors by microwave technology. *Ind. Crops Prod.* **42**, 513–519 (2013).

112. REFRESH FoodWasteEXplorer. https://www.foodwasteexplorer.eu/.

113. Al-Baarri, A. N. *et al.* Corn Germ Color Detection during Storage in Kendal Regency, Central Java. **1024**, 012034 (2022).

114. Kim, D., Orrego, D., Ximenes, E. A. & Ladisch, M. R. Cellulose conversion of corn pericarp without pretreatment. *Bioresour. Technol.* **245**, 511–517 (2017).

115. Khosroshahi, E. D. & Razavi, S. H. Wheat germ valorization by fermentation: A novel insight into the stabilization, nutritional/functional values and therapeutic potentials with emphasis on anti-cancer effects. *Trends Food Sci. Technol.* **131**, 175–189 (2023).

116. USDA FoodData Central Food Search. https://fdc.nal.usda.gov/food-search?type=Foundation&query=.

117. Bhosale, S. & D.Vijayalakshmi. Processing and Nutritional Composition of Rice Bran. *Curr. Res. Nutr. Food Sci. J.* **3**, 74–80 (2015).

118. Saunders, R. M. Rice bran: Composition and potential food uses. *Food Rev. Int.* https://doi.org/10.1080/87559128509540780 (1985) doi:10.1080/87559128509540780.

119. Palaniappan, A., Yuvaraj, S. S., Sonaimuthu, S. & Antony, U. Characterization of xylan from rice bran and finger millet seed coat for functional food applications. *J. Cereal Sci.* **75**, 296–305 (2017).

120. Oberoi, H. S., Vadlani, P. V., Madl, R. L., Saida, L. & Abeykoon, J. P. Ethanol Production from Orange Peels: Two-Stage Hydrolysis and Fermentation Studies Using Optimized Parameters through Experimental Design. *J. Agric. Food Chem.* **58**, 3422–3429 (2010).

121. Vannini, M. *et al.* Integrated Efforts for the Valorization of Sweet Potato By-Products within a Circular Economy Concept: Biocomposites for Packaging Applications Close the Loop. *Polymers* **13**, 1048 (2021).

122. Chemical composition in varieties of rapeseed and turnip rapeseed, including several samples of hull and dehulled seed - Eriksson - 1994 - Journal of the Science of Food and Agriculture - Wiley Online Library. https://scijournals.onlinelibrary.wiley.com/doi/abs/10.1002/jsfa.2740660219.

123. Rodrigues, I.M.M.A., Carvalho, M.G.V.S., & Rocha, J.M.S. Increasing the Protein Content of Rapeseed Meal by Enzymatic Hydrolysis of Carbohydrates. *BioResources* **9**, 2010–2015 (2014).

124. Naczk, M. & Shahidi, F. Carbohydrates of Canola and Rapeseed. in *Canola and Rapeseed: Production, Chemistry, Nutrition and Processing Technology* (ed. Shahidi, F.) 211–220 (Springer US, Boston, MA, 1990). doi:10.1007/978-1-4615-3912-4_12.

125. van Heerden, C. D. & Nicol, W. Continuous succinic acid fermentation by *Actinobacillus succinogenes*. *Biochem. Eng. J.* **73**, 5–11 (2013).

126. Salvachúa, D. *et al.* Succinic acid production on xylose-enriched biorefinery streams by Actinobacillus succinogenes in batch fermentation. *Biotechnol. Biofuels* **9**, 28 (2016).

127. Shamsul, N. S., Kamarudin, S. K. & Rahman, N. A. Study on the physical and chemical composition of agro wastes for the production of 5-hydroxymethylfurfural. *Bioresour. Technol.* **247**, 821–828 (2018).

128. Montipó, S. *et al.* Bioprocessing of rice husk into monosaccharides and the fermentative production of bioethanol and lactate. *Cellulose* **26**, 7309–7322 (2019).

129. Fei, Q. *et al.* Biological valorization of natural gas for the production of lactic acid: Techno-economic analysis and life cycle assessment. *Biochem. Eng. J.* **158**, 107500 (2020).

130. Isar, J., Jain, D., Joshi, H., Dhoot, S. & Rangaswamy, V. MICROBIAL isoprene production: an overview. *World J. Microbiol. Biotechnol.* **38**, 122 (2022).

131. Pitera, D. J., Paddon, C. J., Newman, J. D. & Keasling, J. D. Balancing a heterologous mevalonate pathway for improved isoprenoid production in *Escherichia coli*. *Metab. Eng.* **9**, 193–207 (2007).
