# Supplementary material
Source: Research Square preprint supplement (doi:10.21203/rs.3.rs-9225422/v1)
Supplement: Supplementary file 3 [file e377c6fda0b5c2e391cb3bab.xlsx]

## Sheet: rice
Chemical	FL
Ethanol	Rice	Ref 1	https://www.sciencedirect.com/science/article/pii/S096085241931452X?pes=vor#s0010						Table 2
Ethanol	Rice		Application of industrial amylolytic yeast strains for the production of bioethanol from broken rice
Ethanol	Rice		C6H12O6 = 2 C2H5OH + 2 CO2								The glucose in Rice: 82.67% (g/g)
Ethanol	Rice		Strain (fermentation configuration)	Ethanol (g/L)	YE/Sa (	Q (g/L/h) b	Carbon conversion (mol C)c	Empty Cell	Theoretical yield g ethanol /L	Glucose needed to produce theoretical ethanol yield (g/L)	Rice needed (g)	Yield (g ethanol/g rice)
Ethanol	Rice				(%)
Ethanol	Rice		ER (SSF)d	75.02	78	0.81	0.78	96 h	96.1795	188.177	227.625	0.329578
Ethanol	Rice		ER T12 (supplemented CBP)e	101.38	100	1.07	1		101.38	198.352	239.932	0.422536
Ethanol	Rice		ER T12 (CBP)	93.48	93	0.97	0.95		100.516	196.662	237.888	0.392958
Ethanol	Rice		M2n (SSF)d	79.45	81	0.85	0.81		98.0864	191.908	232.138	0.342254
Ethanol	Rice		M2n T1 (supplemented CBP)e	97.3	99	1.04	0.99		98.2828	192.292	232.603	0.41831
Ethanol	Rice		M2n T1 (CBP)	76.69	79	0.82	0.79		97.0759	189.931	229.746	0.333803
Ethanol	Rice		ER (SSF)d	86.81	89	0.54	0.89	168 h	97.5393	190.838	230.843	0.376057
Ethanol	Rice		ER T12 (supplemented CBP)e	99.49	100	0.6	1		99.49	194.654	235.459	0.422536
Ethanol	Rice		ER T12 (CBP)	100.83	100	0.6	1		100.83	197.276	238.631	0.422536
Ethanol	Rice		M2n (SSF)d	90.4	92	0.55	0.92		98.2609	192.25	232.551	0.388733
Ethanol	Rice		M2n T1 (supplemented CBP)e	99.59	100	0.61	1		99.59	194.85	235.696	0.422536
Ethanol	Rice		M2n T1 (CBP)	100.23	100	0.6	1		100.23	196.102	237.211	0.422536
Ethanol	Rice		AVRG									0.391198
Ethanol	Rice		YE/S represents percentage of the maximum theoretical ethanol yield as calculated from total available glucose equivalents.
Ethanol	Rice	Ref 2	https://pubs.rsc.org/en/content/articlelanding/2015/ra/c5ra17797a				Table 4
Ethanol	Rice		Improving alkaline pretreatment method for preparation of whole rice waste biomass feedstock and bioethanol production
Ethanol	Rice									The glucose in Rice: 82.67% (g/g)
Ethanol	Rice		RWB hydrolysates	Initial sugar concentration (g L−1)	Sugar consumption (%)	Ethanol (g L−1)	Volumetric ethanol production (g L−1 h−1)	Ethanol yield (g g−1)	Ethanol yield (g g−1sugar )	Ethanol yield (g g−1 rice )
Ethanol	Rice		NaOH	20	90 ± 0.85	8.35 ± 0.55	0.23 ± 0.01	0.463 ± 0.01	0.463	0.382762
Ethanol	Rice		NaOH + H2O2	20	94 ± 0.92	8.65 ± 0.54	0.24 ± 0.02	0.460 ± 0.02	0.46	0.380282
Ethanol	Rice		NaOH + ASC	20	95 ± 0.88	8.82 ± 0.61	0.25 ± 0.01	0.464 ± 0.02	0.464	0.383589
Ethanol	Rice		NaOH + SB	20	94 ± 0.92	8.75 ± 0.64	0.24 ± 0.01	0.465 ± 0.02	0.465	0.384416
Ethanol	Rice		NaOH + ASC + SB	20	95 ± 0.85	8.85 ± 0.63	0.25 ± 0.02	0.465 ± 0.03	0.465	0.384416
Ethanol	Rice		Mixture of sugars	20	94 ± 0.85	8.84 ± 0.55	0.24 ± 0.02	0.470 ± 0.03	0.47	0.388549
Ethanol	Rice		AVRG						0.4645	0.384002
Ethanol	Rice
Ethanol	Rice	Ref 3	https://www.sciencedirect.com/science/article/pii/S0196890424000463?pes=vor#b0250
Ethanol	Rice		Consolidated bioprocessing of the organic fraction of municipal solid waste into bioethanol
Ethanol	Rice		Table 2. Conversion of OFMSW, BP and DR to ethanol and other byproducts, separately or in combination, using S. cerevisiae parental strain ER V1 and its recombinant ER T12.7, after 72 or 96 h.
Ethanol	Rice		Time (h)	72						96
Ethanol	Rice		Product (g/L)	OFMSW		BP		Enriched OFMSW a		DR (discolored rice)		Enriched OFMSW + DR		Ethanol production (g/L)	Ethanol yield (% of the theoretical yield)	Theoretical yield g ethanol /L	Glucose needed to produce theoretical ethanol yield (g/L)	Rice needed (g)	Yield (g ethanol/g rice)
Ethanol	Rice			ER V1	ER T12.7	ER V1	ER T12.7	ER V1	ER T12.7	ER V1	ER T12.7	ER V1	ER T12.7
Ethanol	Rice		Glucose	0.07 ± 0.02	0.38 ± 0.09	0	0.12 ± 0.01	0.19 ± 0.01	0.18 ± 0.01	0.30 ± 0.02	0.27 ± 0.02	0.18 ± 0.01	2.39 ± 0.16
Ethanol	Rice		Maltose	0.07 ± 0.01	0.24 ± 0.05	0.11 ± 0.02	0.65 ± 0.01	0.12 ± 0.01	0.78 ± 0.04	0.08 ± 0.005	0.87 ± 0.05	0.22 ± 0.01	0.64 ± 0.04
Ethanol	Rice		Glycerol	0.38 ± 0.03	0.49 ± 0.02	0.20 ± 0.18	2.62 ± 0.04	0.92 ± 0.06	1.07 ± 0.07	1.21 ± 0.07	4.02 ± 0.23	0.97 ± 0.07	4.85 ± 0.31
Ethanol	Rice		Ethanol	3.95 ± 0.15	6.39 ± 0.45	6.68 ± 0.44	23.30 ± 0.55	5.58 ± 0.31	11.28 ± 0.76	7.10 ± 0.47	53.18 ± 2.56	12.05 ± 0.47	66.22 ± 3.43	53.18	0.97	54.8247	107.266	129.752	0.409859
Ethanol	Rice		Ethanol yield a		100 ± 7		100 ± 1		100 ± 1		97 ± 3		96 ± 3
Ethanol	Rice		Q (g/L/h)	0.05	0.09	0.09	0.32	0.08	0.19	0.07	0.55	0.13	0.69
Ethanol	Rice		Qmax (g/L/h)b	0.13	0.25	0.24	0.81	0.23	0.47	0.17	1.22	0.27
Ethanol	Rice		Ethanol yield (% of the theoretical yield) was calculated as the amount of ethanol produced per gram of available glucose
Ethanol	Rice
Ethanol	Rice	Ref 4	https://www.nature.com/articles/s41598-022-06245-0/tables/2				Table 2
Ethanol	Rice		Evaluation of different strains of Saccharomyces cerevisiae for ethanol production from high-amylopectin BRS AG rice (Oryza sativa L.)
Ethanol	Rice		Table 2 BRS AG rice fermentation with different strains of Saccharomyces cerevisiae parameters (N.B. standard deviation was determined from the essays carried out in triplicate).
Ethanol	Rice			BG-1	CAT-1	FT-858	JP-1	PE-2	SA-1
Ethanol	Rice		Ethanol (g L−1)	54.67 ± 4.36	61.25 ± 9.02	62.45 ± 6.43	58.56 ± 11.52	54.10 ± 6.67	57.80 ± 12.61
Ethanol	Rice		Glycerol (g L−1)	5.21 ± 1.03	5.82 ± 0.80	5.34 ± 0.68	4.15 ± 0.59	3.31 ± 0.21	7.20 ± 0.54
Ethanol	Rice		Yield (%)	78.99	87.87	89.55	84.3	85.22	83.32
Ethanol	Rice		YE/S	0.4	0.45	0.46	0.43	0.44	0.43
Ethanol	Rice		YG/S	0.04	0.04	0.04	0.03	0.03	0.05
Ethanol	Rice		Productivity (gethanol L−1 h−1)	1.14	1.28	1.3	1.22	1.13	1.2
Ethanol	Rice		Substrate consumption rates (gglucose L−1 h−1)	2.82	2.84	2.84	2.83	2.59	2.83
Ethanol	Rice		Residual glucose (g L−1)	1.03 ± 1.79	0.06 ± 0.11	0	0.53 ± 0.09	12.26 ± 2.02	0.72 ± 0.21
Ethanol	Rice
Ethanol	Rice		Ethanol (g L−1)	54.67	61.25	62.45	58.5	54.1	57.8
Ethanol	Rice		glucose (substrate) conversion factors in ethanol (YE/S)	0.4	0.45	0.46	0.43	0.44	0.43
Ethanol	Rice		Residual glucose (g L−1)	1.03	0.06	0	0.53	12.26	0.72
Ethanol	Rice		Glucose needed to Ethanol (g L−1)	106.963	119.837	122.185	114.457	105.848	113.087
Ethanol	Rice		total glucose (g L−1)	107.993	119.897	122.185	114.987	118.108	113.807
Ethanol	Rice		Rice needed (g/L)	130.631	145.031	147.798	139.091	142.867	137.664
Ethanol	Rice		Yield (g ethanol/g rice)	0.418506	0.422324	0.422536	0.420588	0.378675	0.419862
Ethanol	Rice		AVRG	0.413748
Ethanol	Rice
Ethanol	Rice		Table 1 BRS PAMPA rice fermentation parameters with different strains of Saccharomyces cerevisiae (N.B. standard deviation was determined from the essays carried out in triplicate).
Ethanol	Rice			BG-1	CAT-1	FT-858	JP-1	PE-2	SA-1
Ethanol	Rice		Ethanol (g L−1)	49.96 ± 9.67	58.93 ± 12.85	54.22 ± 4.12	53.43 ± 2.57	55.01 ± 2.67	58.92 ± 10.83
Ethanol	Rice		Glycerol (g L−1)	3.91 ± 0.76	5.17 ± 1.04	4.84 ± 0.62	4.33 ± 0.27	3.12 ± 0.24	6.67 ± 0.72
Ethanol	Rice		Yield (%)	78.56	92.68	85.27	84.14	86.64	93.04
Ethanol	Rice		YE/S	0.4	0.47	0.44	0.43	0.44	0.48
Ethanol	Rice		YG/S	0.03	0.04	0.04	0.04	0.03	0.05
Ethanol	Rice		Productivity (gethanol L−1 h−1)	1.04	1.23	1.13	1.11	1.15	1.23
Ethanol	Rice		Substrate consumption rates (gglucose L−1 h−1)	2.59	2.59	2.59	2.59	2.59	2.58
Ethanol	Rice		Residual glucose (g L−1)	0	0	0	0.17 ± 0.30	0.20 ± 0.35	0.51 ± 0.23
Ethanol	Rice		Ethanol (g L−1)	49.96	58.93	54.22	53.43	55.01	58.92
Ethanol	Rice		glucose (substrate) conversion factors in ethanol (YE/S)	0.4	0.47	0.44	0.43	0.44	0.48
Ethanol	Rice		Residual glucose (g L−1)	0	0	0	0.17	0.2	0.51
Ethanol	Rice		Glucose needed to Ethanol (g L−1)	97.7478	115.298	106.083	104.537	107.628	115.278
Ethanol	Rice		total glucose (g L−1)	97.7478	115.298	106.083	104.707	107.828	115.788
Ethanol	Rice		Rice needed (g/L)	118.239	139.468	128.321	126.657	130.432	140.061
Ethanol	Rice		Yield (g ethanol/g rice)	0.422536	0.422536	0.422536	0.42185	0.421752	0.420674
Ethanol	Rice		AVRG	0.42198
Ethanol	Rice
Ethanol	Rice hull	ref 1	https://www.scopus.com/record/display.uri?eid=2-s2.0-84859838302&origin=resultslist&sort=plf-f&src=s&sid=770bdfea32c2728de40361b11b940c79&sot=a&sdt=a&s=TITLE-ABS-KEY%28%28%22rice+hull%22%29+AND+%28%22ethanol+production%22%29%29&sl=55&sessionSearchId=770bdfea32c2728de40361b11b940c79&relpos=13
Ethanol	Rice hull		Bioethanol production from acid-pretreated rice hull
Ethanol	Rice hull		ethanol yield (0.47 g-ethanol/g-glucose) of rice-hull hydrolysate
Ethanol	Rice hull
Ethanol	Rice hull		Table 2. Composition of media for ethanol fermentation.
Ethanol	Rice hull		Medium	Glucose (g/L)	HMF (mg/L)	Furfural (mg/L)	Acetic acid (mg/L)
Ethanol	Rice hull		Reference	20.2±1.0	-	-	-
Ethanol	Rice hull		Rice hulla	19.8±0.8	50±1.3	204±1.7	1469±2.1
Ethanol	Rice hull		aRice hull hydrolysate was prepared under the conditions of 5-h impregnation and 2-h hydrolysis with a 2 : 1 acid-to-biomass ratio. Valuesare given as the mean±standard deviation of three replicates.
Ethanol	Rice hull
Ethanol	Rice hull		Table 3. Effect of inhibitors on ethanol fermentation.
Ethanol	Rice hull		Medium	Glucose consumption(%)	Ethanol yield(g/g glucose)a	Specific growthrate (h−1)	CFU(cells/mL)
Ethanol	Rice hull		Reference	100	0.49	0.18	1.4×108
Ethanol	Rice hull		Rice hulla	100	0.47	0.158	9.0×107
Ethanol	Rice hull		aEthanol yield based on consumed glucose in each medium. All data were obtained after ethanol fermentation for 18 h
Ethanol	Rice hull
Ethanol	Rice hull		glucose content (g/g rice hull)	0.3508
Ethanol	Rice hull		Ethanol yield(g/g glucose)	0.164876
Ethanol	Rice hull
Ethanol	Rice hull	ref 2	https://aiche.onlinelibrary.wiley.com/doi/10.1002/btpr.2275
Ethanol	Rice hull		Ethanol production from rice hull using Pichia stipitis and optimization of acid pretreatment and detoxification processes
Ethanol	Rice hull		Table 5. Ethanol Production from Base-line Mediums and Nondetoxified and Detoxified Hydrolysates by Using Pichia stipis ATCC 58784
Ethanol	Rice hull		Process	Kinetic Parameters
Ethanol	Rice hull			S (g/L) sugar consumed	P (g/L) ethanol produced	X (g/L)biomass produced	YP/S (%) yield	QS (g/L/h)	QP (g/L/h)	QX (g/L/h)	SUY (%)	YP/S (%) yield
Ethanol	Rice hull		Control (glucose)	10.38 ± 0.42	4.84b ± 0.05	5.31a ± 0.01	46.57a ± 1.26	0.32cd ± 0.02	0.24a ± 0.01	0.13a ± 0.02	84.69a ± 3.32
Ethanol	Rice hull		Control (xylose)	10.88 ± 0.34	5.37a ± 0.09	3.87b ± 0.06	49.41a ± 0.65	0.41b ± 0.01	0.20b ± 0.00	0.07ab ± 0.00	82.37a ± 0.80
Ethanol	Rice hull		Nondetoxified RHH	15.37 ± 0.28	1.16f ± 0.02	3.54bc ± 0.45	7.55d ± 0.04	0.11f ± 0.02	0.02g ± 0.01	0.05b ± 0.02	69.89b ± 1.29
Ethanol	Rice hull		Process-1 (CaO)	12.85 ± 0.90	2.85e ± 0.05	2.71c ± 0.34	22.16c ± 1.95	0.35bc ± 0.03	0.09e ± 0.00	0.07ab ± 0.01	73.68b ± 0.19	22.16
Ethanol	Rice hull		Process-2 (CaO)	15.58 ± 1.11	5.56a ± 0.02	3.20bc ± 0.37	35.69b ± 2.41	0.66a ± 0.04	0.18c ± 0.00	0.12a ± 0.03	79.65a ± 0.18	35.69
Ethanol	Rice hull		Process-3 (NaOH)	12.43 ± 0.38	4.15c ± 0.07	3.53bc ± 0.42	33.43b ± 0.55	0.24de ± 0.02	0.11d ± 0.00	0.08ab ± 0.02	59.66c ± 2.64	33.43
Ethanol	Rice hull		Process-4 (NaOH)	12.17 ± 0.86	3.93c ± 0.07	2.69c ± 0.31	32.32b ± 1.74	0.29cd ± 0.02	0.07f ± 0.00	0.08ab ± 0.02	59.65c ± 0.13	32.32
Ethanol	Rice hull		Process-5 (NaOH)	12.56 ± 0.25	3.21d ± 0.10	3.21bc ± 0.36	25.53c ± 0.30	0.28cde ± 0.03	0.07f ± 0.00	0.07ab ± 0.02	63.07c ± 1.32	25.53
Ethanol	Rice hull		Process-6 (Charcoal)	12.72 ± 0.99	4.05c ± 0.10	2.84bc ± 0.30	31.80b ± 1.39	0.20e ± 0.03	0.08ef ± 0.01	0.08ab ± 0.02	72.09b ± 0.18	31.8
Ethanol	Rice hull		Values are given as the mean ± standard deviation of two replicates. Different letters in the same column indicate statistically significance between mean values (P < 0.05).
Ethanol	Rice hull		sugar consumed (S), ethanol produced (P), biomass produced (X), yield (YP/S), maximum substrate consumption rate (QS), maximum ethanol production rate (QP), maximum biomass growth rate (QX), and sugar utilization yield (SUY)
Ethanol	Rice hull		AVRG									30.155
Ethanol	Rice hull
Ethanol	Rice hull
Ethanol	Rice hull		Table 6. Ethanol Production from Base-line Mediums and Nondetoxified and Detoxified Hydrolysates by Using Pichia stipis ATCC 58785
Ethanol	Rice hull		Process	Kinetic Parameters
Ethanol	Rice hull			S (g/L)	P (g/L)	X (g/L)	YP/S (%)	QS (g/L/h)	QP (g/L/h)	QX (g/L/h)	SUY (%)	YP/S (%) yield
Ethanol	Rice hull		Control (glucose)	15.60 ± 0.21	7.32a ± 0.04	5.08abc ± 0.11	46.90a ± 0.84	1.50a ± 0.06	0.30a ± 0.00	0.16a ± 0.02	89.87a ± 0.18
Ethanol	Rice hull		Control (xylose)	20.25 ± 0.31	5.54b ± 0.03	4.38abc ± 0.02	27.37cd ± 0.54	0.40b ± 0.01	0.13bc ± 0.00	0.06ab ± 0.00	87.83b ± 0.16
Ethanol	Rice hull		Nondetoxified RHH	14.41 ± 1.15	4.31d ± 0.04	2.97c ± 0.62	29.89c ± 2.05	0.21d ± 0.02	0.08d ± 0.00	0.04b ± 0.02	69.80g ± 0.23
Ethanol	Rice hull		Process-1 (CaO)	9.43 ± 0.65	2.84h ± 0.10	3.12bc ± 0.65	30.10c ± 0.79	0.24cd ± 0.01	0.12cd ± 0.01	0.11ab ± 0.04	63.27h ± 0.94	30.1
Ethanol	Rice hull		Process-2 (CaO)	10.57 ± 0.76	4.05de ± 0.09	2.97c ± 0.06	38.33b ± 1.89	0.34bc ± 0.02	0.17b ± 0.01	0.08ab ± 0.02	71.22f ± 0.21	38.33
Ethanol	Rice hull		Process-3 (NaOH)	14.67 ± 1.07	3.81ef ± 0.06	5.60ab ± 0.71	25.97cd ± 1.47	0.33bc ± 0.03	0.10cd ± 0.03	0.10ab ± 0.04	74.86e ± 0.17	25.97
Ethanol	Rice hull		Process-4 (NaOH)	14.02 ± 1.00	3.45fg ± 0.09	5.02abc ± 1.23	24.60d ± 1.13	0.30bcd ± 0.03	0.08d ± 0.01	0.11ab ± 0.04	77.59c ± 0.19	24.6
Ethanol	Rice hull		Process-5 (NaOH)	12.60 ± 1.07	3.35g ± 0.17	5.64ab ± 0.71	26.59cd ± 0.59	0.29cd ± 0.03	0.08d ± 0.02	0.14ab ± 0.05	76.04d ± 0.19	26.59
Ethanol	Rice hull		Process-6 (Charcoal)	12.96 ± 0.92	4.87c ± 0.24	6.03a ± 1.24	37.55b ± 0.98	0.24cd ± 0.03	0.10cd ± 0.01	0.10ab ± 0.04	77.96c ± 0.21	37.55
Ethanol	Rice hull		Values are given as the mean ± standard deviation of two replicates. Different letters in the same column indicate statistically significance between mean values (P < 0.05).
Ethanol	Rice hull		AVRG									30.5233
Ethanol	Rice hull
Ethanol	Rice hull	ref 3	https://www.sciencedirect.com/science/article/pii/S0960852410020237?pes=vor#t0005
Ethanol	Rice hull		Conversion of sugars present in rice hull hydrolysates into ethanol by Spathaspora arborariae, Saccharomyces cerevisiae, and their co-fermentations
Ethanol	Rice hull		Table 1. Kinetic parameters for Saccharomyces cerevisiae ICV 254D, Spathaspora arborariae UFMG-HM19.1A, and for the co-culture of both yeasts in synthetic medium (G20X20A10) or rice hull hydrolysate (RHH).
Ethanol	Rice hull		Medium	Microorganism	Ethanol			Xylitol
Ethanol	Rice hull				YP/Se.g. (g g−1)	YP/Set (g g−1)	Qp (g L−1 h−1)	YP/Sxy (g g−1)	yield (g ethanol/ a gulose)	yield (g ethanol/ a sugar)
Ethanol	Rice hull		G20X20A10
Ethanol	Rice hull			S. cerevisiae	0.53		0.4	–
Ethanol	Rice hull			S. arborariae		0.46	0.21	0.13
Ethanol	Rice hull			Co-culture		0.77	0.69	0.79
Ethanol	Rice hull
Ethanol	Rice hull		RHH
Ethanol	Rice hull			S. cerevisiae	0.52		0.38	–	0.52
Ethanol	Rice hull			S. arborariae		0.45	0.16	0.33		0.45
Ethanol	Rice hull			Co-culture		0.62	0.25	0.45		0.62
Ethanol	Rice hull		�P/Seg: Ethanol coefficient yield (g ethanol per g glucose consumed);
Ethanol	Rice hull		�P/Set: Ethanol coefficient yield (g ethanol per g total sugar consumed);
Ethanol	Rice hull		�P/Sxy: Xylitol coefficient yield (g xylitol per g xylose consumed).
Ethanol	Rice hull		sugar content							0.4807
Ethanol	Rice hull		glucose ocntent						0.3508
Ethanol	Rice hull		yield (g ethanol/ a rice hull)						0.182416	0.257175
Ethanol	Rice hull
Ethanol	Rice hull	ref 4	https://www.scopus.com/record/display.uri?eid=2-s2.0-79955907236&origin=resultslist&sort=plf-f&src=s&sid=770bdfea32c2728de40361b11b940c79&sot=a&sdt=a&s=TITLE-ABS-KEY%28%28%22rice+hull%22%29+AND+%28%22ethanol+production%22%29%29&sl=55&sessionSearchId=770bdfea32c2728de40361b11b940c79&relpos=15
Ethanol	Rice hull		Process simulation of fuel ethanol production from lignocellulosics using aspen plus
Ethanol	Rice hull		It was found that the dilute acid pretreatment had a higher ethanol yield (347.25 L/t) and lower energy consumption (86.75 MJ/L) than liquid hot water pretreatment.
Ethanol	Rice hull		yield (L ethanol /ton rice hull)	347.25
Ethanol	Rice hull		yield (g ethanol/ a rice hull)	0.274328
Ethanol	Rice hull
Ethanol	Rice hull	ref 5	https://www.sciencedirect.com/science/article/pii/S0960852412019931?pes=vor
Ethanol	Rice hull		Ethanogenic fermentation of co-cultures of Candida shehatae HM 52.2 and Saccharomyces cerevisiae ICV D254 in synthetic medium and rice hull hydrolysate
Ethanol	Rice hull		Table 2. Kinetic parameters obtained for pure cultures of C. shehatae HM 52.2, and for the co-cultivations of C. shehatae HM 52.2 and S. cerevisiae ICV 254D in synthetic medium and rice hull hydrolysate (RHH).
Ethanol	Rice hull		Yeast	Conditions		G20X20A10		G30X15A5		RHH
Ethanol	Rice hull		Empty Cell			YP/S (g g−1)	YX/X (g g−1)	YP/S (g g−1)	YX/X (g g−1)	YP/S (g g−1)	YX/X (g g−1)
Ethanol	Rice hull		C. shehatae	Orbital shaker		0.4	0.45	–	–	0.4	0.13
Ethanol	Rice hull		S. cerevisiae + C. shehatae			0.42	0.2	–	–	0.51	0.13
Ethanol	Rice hull		S. cerevisiae + C. shehatae	Bioreactor	Anaerobic	–	–	0.5	0	0.48	0
Ethanol	Rice hull				Oxygen limitation	–	–	0.51	0.24	0.44	0.11
Ethanol	Rice hull		YP/S, ethanol coefficient yield (g ethanol per g total sugar consumed); YX/X, xylitol coefficient yield (g xylitol per g xylose consumed).
Ethanol	Rice hull		Avrg yied							0.4575
Ethanol	Rice hull		sugar content							0.4807
Ethanol	Rice hull		yield (g ethanol/ a rice hull)							0.21992
Ethanol	Rice hull
Ethanol	rice bran	ref 1	https://www-sciencedirect-com.ezproxy.library.wur.nl/science/article/pii/S1871678414006736#sec0065
Ethanol	rice bran		Biofilm production by Zymomonas mobilis enhances ethanol production and tolerance to toxic inhibitors from rice bran hydrolysate
Ethanol	rice bran		Table 2. Concentrations of ethanol produced by Z. mobilis ZM4, TISTR 405, 548, 550 and 551 biofilms and planktonic cells after 4 days of fermentation in rice bran hydrolysate (standard deviation n = 3).
Ethanol	rice bran		Z. mobilis strain	Biofilm		Planktonic
Ethanol	rice bran			Ethanol production (g/L)	%Theoretical yield	Ethanol production (g/L)	%Theoretical yield	Ethanol production (g/L)	%Theoretical yield	Theoretical Ethanol production (g/L)	Glucose needed to produce theoretical ethanol yield (g/L)	Rice bran needed (g/L)	Yield (g ethanol/g rice)
Ethanol	rice bran		ZM4	13.40 ± 2.43	72.47 ± 6.13%	0.432 ± 0.29	3.71 ± 5.24	13.4	0.7247	18.4904	36.1769	218.064	0.0614497
Ethanol	rice bran		405	6.34 ± 3.46	40.05 ± 99.24%	0.0154 ± 0.0134	2.43 ± 2.11	6.34	0.4005	15.8302	30.9722	186.692	0.0339597
Ethanol	rice bran		548	0	0	0.0304 ± 0.0527	0.67 ± 1.160
Ethanol	rice bran		550	3.498 ± 5.41	20.45 ± 34.74%	0.031 ± 0.0545	0.654 ± 1.133	3.498	0.2045	17.1051	33.4666	201.727	0.0173402
Ethanol	rice bran		551	8.956 ± 4.06	48.37 ± 16.64%	0.0846 ± 0.064	2.046 ± 1.58	8.956	0.4837	18.5156	36.2262	218.362	0.0410145
Ethanol	rice bran		AVRG										0.0384411
Ethanol	rice bran
Ethanol	rice bran
Ethanol	rice bran	Ref 2
Ethanol	rice bran		Table 4 Alcohol yields after fermentation of the hydrolysates of various pretreated deoiled rice bran residues after bioconversion with crude enzyme preparation from Aspergillus niger P-19
Ethanol	rice bran		From: A low-cost process for efficient hydrolysis of deoiled rice bran and ethanol production using an inhouse produced multi-enzyme preparation from Aspergillus niger P-19
Ethanol	rice bran		Treatment	Alcohol yields in the enzymatic hydrolysate
Ethanol	rice bran			Initial sugar	Residual	Sugars utilized	Maximum alcohol obtainable (g/l)	Alcohol obtained (ml/l)	Alcohol obtained (g/l)	Alcohol yield	Fermentation efficiency (%)
Ethanol	rice bran									(g/g of sugar)
Ethanol	rice bran			(mg/ml)	sugar (mg/ml)	(mg/ml)
Ethanol	rice bran		Control (Steam at	89	32.73	56.27	28.7	28.4	22.66 ± 0.13	0.4	78.96
Ethanol	rice bran
Ethanol	rice bran		15 psi for 15 min)
Ethanol	rice bran		H2SO4 + steam	92.09	35.32	56.77	28.95	23.24	18.55 ± 0.12	0.33	64.08
Ethanol	rice bran		HCl + steam	90.25	37.49	52.76	26.91	20.52	16.37 ± 0.08	0.31	60.83
Ethanol	rice bran		CH3COOH + steam	87.36	34.64	52.72	26.89	19.81	15.81 ± 0.09	0.3	58.79
Ethanol	rice bran		HNO3 + steam	89.39	36.99	52.4	26.72	19.94	15.91 ± 0.06	0.3	59.54
Ethanol	rice bran		H3PO4 + steam	90.59	39.75	50.84	25.93	19.69	15.71 ± 0.08	0.31	60.59
Ethanol	rice bran		NaOH + steam	85.42	36.42	49	24.99	18.34	14.64 ± 0.10	0.3	58.58
Ethanol	rice bran		NH3 + steam	71.79	32.15	39.64	20.22	11.47	9.15 ± 0.03	0.23	45.25
Ethanol	rice bran		KOH + steam	73.93	36.64	37.29	19.02	12.06	9.62 ± 0.06	0.26	50.57
Ethanol	rice bran		Ca(OH)2 + steam	82.04	40.07	41.97	21.4	12.34	9.85 ± 0.08	0.23	46.02
Ethanol	rice bran		avrg							0.285556
Ethanol	rice bran		total sugar (g/g of rice bran)							0.2656
Ethanol	rice bran		Alcohol yield (g/g of rice bran)							0.0758436
Ethanol	rice bran
Ethanol	rice bran
Ethanol	rice bran	ref 3	https://www.degruyter.com/document/doi/10.2202/1556-3758.1453/html
Ethanol	rice bran		Bioconversion of De-Oiled Rice Bran (DORB) Hemicellulosic Hydrolysate into Ethanol by Pichia stipitis NCM3499 under Optimized Conditions
Ethanol	rice bran		Table 2: Fermentation profile of DORB hydrolysate (3.5% H2SO4 v/v) after overliming by P. stipitis NCIM3499 at 30 oC, 200 rpm and pH-5.5 after 72 h of incubation
Ethanol	rice bran		Parameters	Values	Values	total sugar (g/g rice bran)	Alcohol yield (g/g of rice bran)
Ethanol	rice bran		Initial sugars (gs/l)	33.55±0.44	33.55
Ethanol	rice bran		Sugars utilized (%)	88.50±0.56	88.5
Ethanol	rice bran		Ethanol produced (gp/l)	12.47±0.26	12.47
Ethanol	rice bran		Biomass (gx/l)	6.25±0.40	6.25
Ethanol	rice bran		Ethanol yield (gp/gs)	0.42±0.021	0.42	0.2656	0.111552
Ethanol	rice bran		Biomass yield (gx/gs)	0.21±0.01	0.21
Ethanol	rice bran		Ethanol productivity (gp/l/h)	0.173±0.002	0.173
Ethanol	rice bran		Ethanol fermentation efficiency (%)	81.74±0.55	81.74
Ethanol	rice bran
Ethanol	rice bran
Ethanol	rice bran	ref 4	https://link.springer.com/article/10.1007/s12355-013-0219-8
Ethanol	rice bran		Evaluation of Rice Bran Extract as a Nitrogen Source for Improved Hemicellulosic Ethanol Production from Sugarcane Bagasse by New Xylose-Fermenting Yeast Strains Isolated from Brazilian Forests
Ethanol	rice bran		Table 1 Fermentation profile of Scheffersomyces shehatae CG8-8BY and Spathaspora arborariae UFMG-HM19.1A in sugarcane bagasse hemicellulosic hydrolysate supplemented with 3 g/l yeast extract (medium#1) and 20 g/l rice bran extract, 2 g/l (NH4)2SO4 and 0.1 g/l CaCl2 (medium#2)
Ethanol	rice bran		Kinetic Parameters	S. shehatae CG8-8BY		S. arborariae UFMG-HM 19.1A	S. shehatae CG8-8BY		S. arborariae UFMG-HM 19.1A	avrg	total sugar (g/g rice bran)	Alcohol yield (g/g of rice bran)
Ethanol	rice bran			Medium#1	Medium#2	Medium#2	Medium#1	Medium#2	Medium#2
Ethanol	rice bran		YP/S (g/g)a	0.20 ± 0.0359	0.33 ± 0.0201	0.14 ± 0.0187	0.2	0.33	0.14	0.223333	0.2656	0.0593173
Ethanol	rice bran		QP (g/l h)b	0.12 ± 0.00961	0.21 ± 0.005	0.04 ± 0.002
Ethanol	rice bran		η (%)c	39.40 ± 7.04	64 ± 3.95	21.20 ± 3.67
Ethanol	rice bran		Xylose consumption (%)d	68 ± 5.76	99 ± 0.002	60.23 ± 0.51
Ethanol	rice bran		Cells concentration (g/l)	1.81 ± 0.25	2.27 ± 0.19	7.27 ± 0.08
Ethanol	rice bran		Ethanol concentration (g/l)	9.27 ± 0.16	17 ± 3.43	5.38 ± 0.35
Ethanol	rice bran		Xylitol concentration (g/l)	0.28 ± 0.12	0.87 ± 0.09	–
Ethanol	rice bran		Fermentation time (h)e	72	72	96
Ethanol	rice bran		Ethanol yield [YP/S (g/g)], ethanol productivity [QP (g/l h)], fermentation efficiency [η (%)], xylose consumption (%), cell concentration (g/l), ethanol concentration (g/l) and xylitol concentration (g/l)
Ethanol	rice bran		aCorrelation between ethanol (ΔPethanol) produced and xylose and glucose (ΔSsugars) consumed
Ethanol	rice bran		bRatio of ethanol concentration (g/l) and fermentation time (h)
Ethanol	rice bran		cPercentage of the maximum theoretical ethanol yield (0.51 g ethanol/g xylose and glucose)
Ethanol	rice bran		dPercentage of initial xylose consumed
Ethanol	rice bran		eTime which show the maximum ethanol production (g/l) value
Ethanol	rice bran
Ethanol	rice bran
Ethanol	rice bran	ref 5	https://link.springer.com/article/10.1007/s13399-022-03252-z
Ethanol	rice bran		Rice bran extract as an alternative nutritional supplement for Kluyveromyces marxianus
Ethanol	rice bran		Table 1 Fermentative parameters and maximum ethanol concentrations during the cultivation of K. marxianus ATCC 36,907 in different nutritional fermentation conditions
Ethanol	rice bran		From: Rice bran extract as an alternative nutritional supplement for Kluyveromyces marxianus
Ethanol	rice bran		Treatment	Ethanol a	YP/S	YX/S	QX	QP	YP/S
Ethanol	rice bran			(g/L)	(g/g)	(g/g)	(g/L.h−1)	(g/L.h−1)	(g/g)
Ethanol	rice bran		T1 (24 h)	2.11 ± 0.08 g	0.38 ± 0.01c	0.12 ± 0.004f	0.15 ± 0.001d	0.09 ± 0.003 g	0.38
Ethanol	rice bran		T2 (24 h)	25.59 ± 0.77a	0.50 ± 0.02a	1.16 ± 0.03c	0.50 ± 0.02b	1.16 ± 0.03c,b	0.5
Ethanol	rice bran		T3 (12 h)	25.50 ± 0.80b	0.49 ± 0.01a	2.13 ± 0.06a	0.67 ± 0.02a	2.13 ± 0.06a	0.49
Ethanol	rice bran		T4 (36 h)	16.34 ± 0.51e	0.29 ± 0.007d,f,g	1.06 ± 0.03d	0.12 ± 0.003e	0.45 ± 0.01f	0.29
Ethanol	rice bran		T5 (24 h)	14.28 ± 0.41f	0.32 ± 0.009b,f	0.83 ± 0.03e	0.20 ± 0.006c	0.59 ± 0.018e	0.32
Ethanol	rice bran		T6 (24 h)	16.51 ± 0.49d	0.28 ± 0.008e,g	0.82 ± 0.025e	0.21 ± 0.011c	0.69 ± 0.02d	0.28
Ethanol	rice bran		T7 (12 h)	24.88 ± 0.75c	0.50 ± 0.02a	2.06 ± 0.05b	0.50 ± 0.01b	2.06 ± 0.06b	0.5
Ethanol	rice bran		Fermentation media: T1 (non-supplemented medium), T2 (medium supplemented with RBE), T3 (medium supplemented with RBE, calcium chloride, and ammonium sulfate), T4 (medium supplemented with malt extract), T5 (medium supplemented with yeast extract), T6 (medium supplemented with peptone); T7 (control-YMP medium)
Ethanol	rice bran		aMaximum ethanol concentration, YP/S: yield of glucose to ethanol (g/g), YX/S: yield of glucose to cells (g/g), QP: volumetric ethanol productivity (g/L.h−1), QX: volumetric cell productivity (g/L.h−1)
Ethanol	rice bran		Averages followed by distinct lowercase letters differ statistically in the column by the Tukey test at 5% significance (p < 0.05)
Ethanol	rice bran		AVRG yield (g ethanol/ a gulose)						0.394286
Ethanol	rice bran		total glucose (g/g of rice bran)						0.165926
Ethanol	rice bran		Alcohol yield (g/g of rice bran)						0.0654223
furfural	rice	theoretical	https://ift.co.za/media/mediafiles/archive/SAIChE%20Congress%202003%20Arnold%20and%20Buzzard%20paper.pdf
furfural			A NOVEL PROCESS FOR FURFURAL PRODUCTION
furfural
furfural			𝒀_(𝒇𝒖𝒓𝒇𝒖𝒓𝒂𝒍/𝒙𝒚𝒍𝒐𝒔𝒆 )	0.7272
furfural			xylose content	0
furfural			Y furfural / biomass	0
furfural
furfural
furfural	rice husk	ref 1	https://doi.org/10.1016/S0960-8524(98)00088-1
furfural			Acid-catalysed hydrolysis of rice hull: Evaluation of furfural production
furfural
furfural
furfural
furfural
furfural
furfural
furfural
furfural
furfural
furfural
furfural
furfural
furfural
furfural
furfural			Furfural yield* of rice husk	0.06
furfural			Water rice husk g/100g	12.08
furfural			Furfural yield of fresh rice husk	0.052752
furfural
furfural
furfural
furfural		ref 2	https://link.springer.com/article/10.1007/s11814-007-0101-z
furfural			Furfural production by acid hydrolysis and supercritical carbon dioxide extraction from rice husk
furfural			Moreover, furfural production by two-stage process (pre-hydrolysis and dehydration) can improve furfural yield further to be around 90% of theoretical maximum.
furfural			Stoichiometric yield of furfural is 72.72 g per 100 g of pentosan [2]
furfural
furfural
furfural			theoretical yield g/g pentosan	0.7272
furfural			90% of theoretical maximum.	0.9
furfural			yield g/g pentosan	0.65448
furfural			g pentosan/g rice husk	0.1299
furfural			g Furfural/g rice husk	0.085017
furfural
furfural
furfural		ref 3	https://link.springer.com/article/10.1007/s13399-020-00810-1
furfural			Furfural production from rice husks within a biorefinery framework
furfural			The results obtained for furfural yield, ..., which generated a furfural production amounting to 6.0% (w/w) of the oven-dried rice husk weight (55% of the theoretical yield) and a 60% solid yield.
furfural			theoretical yield	0.55
furfural			theoretical yield g/g pentosan	0.7272
furfural			yield g/g pentosan	0.39996
furfural			g pentosan/g rice husk	0.1299
furfural			g Furfural/g rice husk	0.0519548
furfural
furfural
furfural		ref 4	https://www.sciencedirect.com/science/article/pii/S0008621512002984?via=ihub#t0025
furfural			Furfural production from rice husk using sulfuric acid and a solid acid catalyst through a two-stage process
furfural			Table 5. Comparison of furfural yield produced from various substrates using a two-stage process
furfural			Raw material	Investigator	Yield based on weight of raw material (%)
furfural			Rice hull	Mansilla et al.14	∼10.5
furfural			Hemicellulose (xylose) of bagasse	Punsuvon et al.15	∼10.3
furfural			Hemicellulose of dPPF	Wiboon Riansa-ngawong et al.16	17.34
furfural			Rice husk	This study	8.9
furfural
furfural			g Furfural/g rice husk		0.089
furfural
furfural
furfural		ref 5	https://www.sciencedirect.com/science/article/pii/S0960852498000881
furfural			Acid-catalysed hydrolysis of rice hull: Evaluation of furfural production
furfural			Raw material	Investigator	Yield based on weight of raw material (%)
furfural			Rice hull	Mansilla et al.14	∼10.5
furfural
furfural			g Furfural/g rice husk		0.105
furfural
furfural
furfural	rice bran	theoretical	https://ift.co.za/media/mediafiles/archive/SAIChE%20Congress%202003%20Arnold%20and%20Buzzard%20paper.pdf
furfural			A NOVEL PROCESS FOR FURFURAL PRODUCTION
furfural
furfural			𝒀_(𝒇𝒖𝒓𝒇𝒖𝒓𝒂𝒍/𝒙𝒚𝒍𝒐𝒔𝒆 )	0.7272
furfural			xylose content	0.0674
furfural			Y furfural / biomass	0.0490133
HMF		theoretical	HMF formation reactions (i.e., glucan hydrolysis, glucose isomerization, and fructose dehydration)
HMF			C6H12O6 (Fructose) → C5H4O2CHO (Hydroxymethylfurfural) + 2H2O.
HMF			180	126
HMF			theoretical yield g/g fructose	0.7
HMF
HMF	rice	ref 1	https://pubs.acs.org/doi/10.1021/acssuschemeng.8b05141
HMF			Organic Acid-Regulated Lewis Acidity for Selective Catalytic Hydroxymethylfurfural Production from Rice Waste: An Experimental–Computational Study
HMF
HMF							Pf is the concentration of the product (disaccharide, glucose, fructose, HMF, levoglucosan, LA, FA, and furfural)
HMF							np and nGlu are the number of carbons in the corresponding product and glucose, respectively
HMF							MWp and MWGlu are the molecular masses of the corresponding product and glucose, respectively
HMF							Glui and Gluf refer to the initial and final concentration of glucose, respectively
HMF
HMF
HMF
HMF
HMF
HMF
HMF
HMF
HMF			The HMF yields of 35.2 and 17.3 mol % were obtained from rice waste in the Al(III) and Al/maleicA systems, respectively.
HMF			yields (mol %)	35.2	17.3
HMF			avrg yields (mol %)	26.25
HMF			glucose in rice g/g	0.826667
HMF			glucose in rice mol/g	0.00459259
HMF			HMF mol /g	0.00161659
HMF			HMF from rice g/g	0.203691
HMF
HMF
HMF		ref 2	https://onlinelibrary.wiley.com/doi/10.1002/ente.202000597
HMF			Aqueous Choline Chloride/γ-Valerolactone as Ternary Green Solvent Enhance Al(III)-Catalyzed Hydroxymethylfurfural Production from Rice Waste
HMF
HMF			Table 4. Comparison of reaction conditions and HMF yield of the biomass waste or model carbohydrates to HMF
HMF			Substrate	Reaction system	Conditions	Heating	HMF yield	Reference
HMF			Starch	40 mg cellulose-derived carbonaceous catalyst (CCC)	160 °C, 15 min	Oil bath	0.428	[46]
HMF			Glucose	5 mol% CrCl3·6H2O, 1 mL DMSO/H2O	120 °C, 3 h	Autoclave	0.176	[45]
HMF			Glucose	0.42 mM AlCl3·6H2O, GVL/ChCl-H2O (1:1 wt/wt)	140 °C, 1 h	Oil bath	29.7 mol%	This study
HMF			Cellulose	HCl (pH 3), 30 mL H2O	300 °C, 0 min	Muffle furnace	20.7 mol%	[47]
HMF			Maltose	55.5 mm SnCl4, PC/H2O (1:1 v/v)	120 °C, 10 min	Microwave	27.8 mol%	[20]
HMF			Maltose	55.5 mm SnCl4, GVL/H2O (1:1 v/v)	120 °C, 10 min	Microwave	19.7 mol%	[20]
HMF			Maltose	55.5 mm SnCl4, acetone/H2O (1:1 v/v)	120 °C, 10 min	Microwave	10.2 mol%	[20]
HMF			Maltose	0.42 mm AlCl3·6H2O, GVL/ChCl–H2O (1:1 wt/wt)	140 °C, 1 h	Oil bath	31.2 mol%	This study
HMF			Bread waste	55.5 mm SnCl4; 20 mL DMSO/H2O(1:1 v/v)	160 °C, 20 min	Microwave	21.4 wt%	[13]
HMF			Cooked rice	55.5 mm FeCl3; 20 mL DMSO/H2O(1:1 v/v)	160 °C, 20 min	Microwave	18.1 wt%	[12]
HMF			Cooked rice	55.5 mm SnCl4; 20 mL DMSO/H2O(1:1 v/v)	140 °C, 40 min	Microwave	22.6 wt%	[44]
HMF			Cooked rice	55.5 mm Lewis acid, DMSO/H2O (1:1 v/v)	140 °C, 20 min	Microwave	8.1-9.5 mol%	[12]
HMF			Cooked rice	0.42 mm AlCl3·6H2O, GVL/ChCl–H2O (1:1 wt/wt)	140 °C, 1 h	Oil bath	18.60 mol%	This study
HMF
HMF			yields (mol %)	18.6
HMF			glucose in rice g/g	0.826667
HMF			glucose in rice mol/g	0.00459259
HMF			HMF mol /g rice	0.000854222
HMF			HMF from rice g/g	0.107632
HMF
HMF
HMF
HMF		ref 3	https://www.sciencedirect.com/science/article/pii/S0960852416311233?casa_token=4MKCRwh2jWMAAAAA:PYz3qUZ70Ua7bTGG4fC9Ru3BkctfZX8LzcZVXeU6ndRrygTWFdUvUDtM_LzgeLyrZNh3xFU#m0005
HMF			Valorization of food waste into hydroxymethylfurfural: Dual role of metal ions in successive conversion steps
HMF
HMF			Substrate	Reaction system	Conditions	Heating	HMF yield	HMF yield g/g substrate
HMF			Cooked rice	55.5 mm FeCl3; 20 mL DMSO/H2O(1:1 v/v)	160 °C, 20 min	Microwave	18.1 wt%	0.181
HMF
HMF
HMF									Pf was referred to the final product concentration as above while Si represented the mass of cooked rice, bread crust or starch added.
HMF
HMF
HMF
HMF
HMF
HMF			Substrate	Reaction system	Conditions	Heating	HMF yield	HMF yield mol%
HMF			Cooked rice	55.5 mm Lewis acid, DMSO/H2O (1:1 v/v)	140 °C, 20 min	Microwave	8.1-9.5 mol%	8.8
HMF
HMF								where Pf was referred to the concentration of final product i.e., fructose, glucose, HMF, levoglucosan, levulinic acid and formic acid;
HMF								Si and Sf represented initial and final concentration of sugars i.e., fructose and glucose; np and ns were the numbers of carbon in the corresponding product and substrate;
HMF								and MW was referred to molecular mass of the corresponding compound.
HMF
HMF
HMF
HMF
HMF
HMF
HMF
HMF			yields (mol %)	8.8
HMF			glucose in rice g/g	0.826667
HMF			glucose in rice mol/g	0.00459259
HMF			HMF mol /g rice	0.000404148
HMF			HMF from rice g/g	0.0509227
HMF
HMF			avrg	0.115961
HMF
HMF
HMF		ref 4	https://onlinelibrary.wiley.com/doi/10.1002/ente.202000597
HMF			Aqueous Choline Chloride/γ-Valerolactone as Ternary Green Solvent Enhance Al(III)-Catalyzed Hydroxymethylfurfural Production from Rice Waste
HMF			Table 4. Comparison of reaction conditions and HMF yield of the biomass waste or model carbohydrates to HMF
HMF			Substrate	Reaction system	Conditions	Heating	HMF yield	Reference
HMF			Cooked rice	55.5 mm SnCl4; 20 mL DMSO/H2O(1:1 v/v)	140 °C, 40 min	Microwave	22.6 wt%	[44]	0.226
HMF			HMF from rice g/g	0.226
HMF
HMF
HMF		ref 5	https://chemistry-europe.onlinelibrary.wiley.com/doi/10.1002/cssc.202101889
HMF			Aqueous-Natural Deep Eutectic Solvent-Enhanced 5-Hydroxymethylfurfural Production from Glucose, Starch, and Food Wastes
HMF
HMF
HMF
HMF
HMF
HMF
HMF
HMF
HMF			Table 3. Typical SnCl4 catalytic conversion methods and results from biomass to HMF.
HMF			Entry	Substrate	Solvent	SnCl4	Conditions	HMF yield [%]	Ref.
HMF			1	glucose (0.56 mmol)	[BMIM][BF4] (1 g)	0.056 mmol	100 °C, 3 h	61	[19a]
HMF			2	starch (0.62 mmol)	[BMIM][BF4] (1 g)	0.062 mmol	100 °C, 24 h	47	[19a]
HMF			3	glucose (10 wt%)	[EMIM]Br	10 mol%	100 °C, 3 h	64.5	[26]
HMF			4	glucose (40 wt%)	[EMIM]Br	40 mol%	100 °C, 1 h	56	[26]
HMF			5	glucose (10 wt%)	[EMIM]Br/GDE (1 : 4 w/w)	10 mol%	100 °C, 3 h	58.7	[26]
HMF			6	cooked rice (5 wt%)	DMSO/H2O (1 : 1 v/v, 10 mL)	0.056 m	microwave, 140 °C, 40 min	22.7 wt %	[27]
HMF			7	bread waste (5 wt%)	acetonitrile/H2O (1 : 1 v/v, 10 mL)	55.5 mm	microwave, 140 °C, 25 min	26	[9]
HMF			8	bread waste (5 wt%)	propylene carbonate/H2O (1 : 1 v/v, 10 mL)	55.5 mm	microwave, 120 °C, 7.5 min	20.5	[19b]
HMF			9	bread waste (5 wt%)	GVL/H2O (1 : 1 v/v, 10 mL)	55.5 mm	microwave, 120 °C, 40 min	24.3	[19b]
HMF			10	glucose (30 wt%)	ChCl/MIBK	5 mol%	120 °C, 2 h	29.1	this work
HMF			11	glucose (30 wt%)	water-ChCl/MIBK	5 mol%	130 °C, 2 h	64.3	this work
HMF			12	starch (10 wt%)	water-ChCl/MIBK	25 mol%	130 °C, 2 h	64	this work
HMF			13	rice waste (10 wt%)	water-ChCl/MIBK	25 mol%	130 °C, 2 h	61.3	this work
HMF			14	bread waste (10 wt%)	water-ChCl/MIBK	25 mol%	130 °C, 2 h	54.5	this work
HMF
HMF
HMF
HMF			yields (mol %)	61.3
HMF			glucose in rice g/g	0.826667
HMF			glucose in rice mol/g	0.00459259
HMF			HMF mol /g rice	0.00281526
HMF			HMF from rice g/g	0.354723
HMF
HMF
HMF
HMF	rice hull	theoretical	HMF formation reactions (i.e., glucan hydrolysis, glucose isomerization, and fructose dehydration)
HMF			C6H12O6 (Fructose) → C5H4O2CHO (Furfural) + 2H2O.
HMF			180	126
HMF			theoretical yield g/g fructose+glucose	0.7
HMF			fructose+glucose in rice hull %	35.0845
HMF			theoretical yield g/ g rice	0.245592
HMF
HMF		ref 1	https://www.scielo.br/j/cta/a/qSNF38K7nB3zhwwWHKYWdpm/?lang=en
HMF			ustainable production of furfural and 5-hidroximetilfurfural from rice husks and soybean peel by using ionic liquid
HMF
HMF
HMF
HMF
HMF
HMF			HMF yield	0.087
HMF			yields (mol %)	8.7
HMF			glucose in hull g/g	0.350845
HMF			glucose in rice mol/g	0.00194914
HMF			HMF mol /g rice	0.000169575
HMF			HMF from rice g/g	0.0213665	abnormal value
HMF
HMF		ref 2	https://pubs.rsc.org/en/content/articlelanding/2016/cy/c6cy00820h
HMF			High yield conversion of cellulosic biomass into 5-hydroxymethylfurfural and a study of the reaction kinetics of cellulose to HMF conversion in a biphasic system
HMF			Using an external standard method and calibration curves of commercially available standard substrates, conversion (mol%) and product yield (mol%) were calculated according to:
HMF
HMF
HMF
HMF
HMF
HMF			where nC6 and nCo 6 denote the number of moles of C6 sugar in the product and feed, respectively, and ni is the number of moles of identified products (HMF, furfural etc.)
HMF
HMF
HMF			Another desirable attribute of our process is the significant conversion of real biomass to both HMF and furfural.
HMF			A combined furan yield of about 76% (49–52% HMF and 23–28% furfural) is achievable.
HMF			Catalytic conversion of the cellulose rich pulp after biomass fractionation led to an increased production in HMF to about 72% (bagasse) and 65% (husk).
HMF
HMF			HMF yield	0.49
HMF			HMF yield	0.52
HMF			HMF yield	0.65
HMF			avrg yields (mol %)	0.553333
HMF			yields (mol %)	55
HMF			glucose in hull g/g	0.350845
HMF			glucose in rice mol/g	0.00194914
HMF			HMF mol /g rice	0.00107203
HMF			HMF from rice g/g	0.135075
FDCA	rice	theoretical	https://www.researchgate.net/figure/Theoretical-and-Overall-Yield-for-the-Conversion-of-Pure-Sugars-to-Ethylene-via-Ethanol_tbl6_259752935
FDCA			Chemocatalytic Processes for the Production of Bio-Based Chemicals from Carbohydrates
FDCA
FDCA
FDCA
FDCA
FDCA
FDCA
FDCA
FDCA
FDCA
FDCA
FDCA
FDCA
FDCA
FDCA
FDCA
FDCA
FDCA
FDCA
FDCA
FDCA
FDCA			HMF	hydroxymethyl furfural
FDCA			MMF	5-methoxymethylfurfural
FDCA			CMF	chloromethyl furfural
FDCA
FDCA				Combined Theoretical Yield on Fructose
FDCA			HMF step FDCA	0.867	w/w%
FDCA			MMF step FDCA	0.867
FDCA			CMF step FDCA	0.867
FDCA
FDCA			theoretical yield FDCA from sugar g/g	0.867
FDCA			fru+glu in rice %	82.6667
FDCA			theoretical yield FDCA from rice g/g	0.71672
FDCA
FDCA
FDCA	rice hull	theoretical	https://www.researchgate.net/figure/Theoretical-and-Overall-Yield-for-the-Conversion-of-Pure-Sugars-to-Ethylene-via-Ethanol_tbl6_259752935
FDCA			Chemocatalytic Processes for the Production of Bio-Based Chemicals from Carbohydrates
FDCA			theoretical yield FDCA from sugar g/g	0.867
FDCA			fru+glu in rice hull %	35.0845
FDCA			theoretical yield FDCA from rice hull g/g	0.304183
FDCA
FDCA	rice bran	theoretical	https://www.researchgate.net/figure/Theoretical-and-Overall-Yield-for-the-Conversion-of-Pure-Sugars-to-Ethylene-via-Ethanol_tbl6_259752935
FDCA			Chemocatalytic Processes for the Production of Bio-Based Chemicals from Carbohydrates
FDCA			theoretical yield FDCA from sugar g/g	0.867
FDCA			fru+glu in rice bran %	19.8162
FDCA			theoretical yield FDCA from rice bran g/g	0.171806
Isoprene	theoretical	there is no study on rice to isoprene. In most glucose-to-isoprene studies, cell engineering or genetic engineering are applied to drive certain metabolic pathways. Two pathways of glucose - isoprene are employed to calculate the yield.
Isoprene	theoretical
Isoprene	theoretical	theoretical	https://pubs.acs.org/doi/full/10.1021/acssuschemeng.9b00362?casa_token=HvjJqUzNJ3gAAAAA%3AqPow9-3aI3LfvV-B7hDyx6juRhnat1RX_8uo7MjurBrUUK4dB0gOuXGteXtUyjs7ZdvE0UnSxKqZ
Isoprene	theoretical		Process Design and Economic Analysis of Renewable Isoprene from Biomass via Mesaconic Acid
Isoprene	theoretical		from glucose to isoprene
Isoprene	theoretical
Isoprene	theoretical
Isoprene	theoretical
Isoprene	theoretical
Isoprene	theoretical
Isoprene	theoretical
Isoprene	theoretical
Isoprene	theoretical
Isoprene	theoretical
Isoprene	theoretical
Isoprene	theoretical		In later work, further metabolic engineering by driving carbon flux and overexpressing sugar transporters led to the production of mesaconic acid with a titer of 23.18 g·L–1 and a yield of 0.465 g·g–1 glucose (64.4% of the theoretical maximum).
Isoprene	theoretical
Isoprene	theoretical		mesaconic acid / glucose (g/g)	0.465
Isoprene	theoretical		isoprene /mesaconic acid (g/g)	0.289
Isoprene	theoretical		isoprene/glucose (g/g)	0.134385
Isoprene	theoretical
Isoprene	theoretical
Isoprene	theoretical
Isoprene	theoretical	theoretical	https://journals.plos.org/plosone/article/file?id=10.1371/journal.pone.0033509&type=printable
Isoprene	theoretical		Enhancing Production of Bio-Isoprene Using Hybrid MVA Pathway and Isoprene Synthase in E. coli
Isoprene	theoretical		The theoretical yield was calculated according to the following formula:
Isoprene	theoretical		1.5C6H12O6+2NADPH+6NAD+ -> C5H8+4CO2+6NADH+2- NADP+ +H2O+4[H].
Isoprene	theoretical		The conversion efficiency of glucose to isoprene in the metabolically engineered strain has attained 7%, reaching 28% of the theoretical limit (25.2%).
Isoprene	theoretical
Isoprene	theoretical		theoretical yield (isoprene/glucose)	0.252
Isoprene	theoretical		yield (isoprene/glucose)	0.07
Isoprene	theoretical
Isoprene	theoretical
Isoprene	theoretical	theoretical	https://www.sciencedirect.com/science/article/pii/S109671761630012X?casa_token=_ZL6J9GMtdkAAAAA:SDjfCEWkxSyipae_dy_ZnRUnJaDI9ZbAMVbYyVO_garMhhKEKk7KpJP8hYkZhtKG5IwftWY
Isoprene	theoretical		Synergy between methylerythritol phosphate pathway and mevalonate pathway for isoprene production in Escherichia coli
Isoprene	theoretical
Isoprene	theoretical		Fed-batch cultivation of the engineered strain overexpressing the dual pathway resulted in production of 24.0 g/L isoprene with a yield of
Isoprene	theoretical		g/g of glucose	0.267
Isoprene	theoretical
Isoprene	theoretical
Isoprene	theoretical	theoretical	https://www.sciencedirect.com/science/article/pii/S135951131100184X?casa_token=cZEXdPXFc3MAAAAA:ZGkN6n8wTTflwRfAIcMgJ5nmuk7mzncDpI2ujqCfFCUtAFCWwojGuqSSGjtv2SVAB0cuNwo
Isoprene	theoretical		Microbial production of isoprenoids
Isoprene	theoretical
Isoprene	theoretical
Isoprene	theoretical		heir Bioisoprene™ was used to produce tires, showing it was equivalent to petroleum-derived isoprene. They report a titer of over 60 g/L, a volumetric productivity of 2 g/L/h and a yield of 11% isoprene from glucose.
Isoprene	theoretical
Isoprene	theoretical		yield (isoprene/glucose)	0.11
Isoprene	theoretical
Isoprene	theoretical
Isoprene	theoretical		This project is continuing with the goal of reaching a yield as close to the theoretical maximum stoichiometric yield as possible, which is 24% using the mevalonate pathway or 29% if the MEP pathway can be used.
Isoprene	theoretical
Isoprene	theoretical		yield (isoprene/glucose)	0.24
Isoprene	theoretical		yield (isoprene/glucose)	0.29
Isoprene	theoretical
Isoprene	theoretical	theoretical	avrg yield (g isoprene/g glucose)	0.168877
Isoprene
Isoprene
Isoprene	rice	theoretical	glucose in rice	82.6667
Isoprene			yield (isoprene/rice)	0.140533
Isoprene
Isoprene
Isoprene	rice hull	theoretical	glucose in rice hull	35.0845
Isoprene			yield (isoprene/rice hull )	0.0596437
Isoprene
Isoprene
Isoprene	rice bran	theoretical	glucose in rice bran	16.5926
Isoprene			yield (isoprene/rice bran )	0.0282075
Isoprene
Isoprene
succinic acid	theoretical	theoretical	https://link.springer.com/article/10.1186/s13068-016-0425-1
succinic acid			Succinic acid production on xylose-enriched biorefinery streams by Actinobacillus succinogenes in batch fermentation
succinic acid			We note that the overall maximum theoretical yield of succinate from glucose is 1.12 g/g [61].
succinic acid			Succinate yields ranged between glucose is 1.12 g/g [61]. Succinate yields ranged between
succinic acid
succinic acid			succinate yield	0.6
succinic acid				0.7
succinic acid				0.72
succinic acid				0.64
succinic acid				0.69
succinic acid				0.72
succinic acid				0.61
succinic acid				0.65
succinic acid				0.72
succinic acid				0.68
succinic acid				0.63
succinic acid				0.72
succinic acid				0.52
succinic acid				0.74
succinic acid			avrg yield g/g sugar	0.667143
succinic acid
succinic acid	rice	theoretical	yield g/g sugar	0.667143
succinic acid			glu+fru+xyl in rice	82.6667
succinic acid			succinate yield g/g rice	0.551505
succinic acid
succinic acid
succinic acid	rice hull	ref 1	https://www.sciencedirect.com/science/article/pii/S2352554115300073?via%3Dihub
succinic acid			Sustainable succinic acid production from rice husks
succinic acid			The PAH hydrolysate, containing 18.5 g L−1 glucose and 2.97 g L−1 xylose, produced 12.6 g L−1 SA in 54 h fermentation, which corresponds to a production rate of 0.23 g L−1 h−1 and a yield of 59.9% of SA, equivalent to 0.125 g of SA g−1 of RH.
succinic acid
succinic acid			yield g SA/g rice husk	0.125
succinic acid
succinic acid
succinic acid	rice bran	theoretical	yield g/g sugar	0.667143
succinic acid			glu+fru+xyl in rice bran	26.5611
succinic acid			succinate yield g/g rice bran	0.177201
succinic acid
3-HP	theoretical	theoretical	https://link.springer.com/article/10.1007/s00253-009-1898-7
3-HP			Biosynthetic pathways for 3-hydroxypropionic acid production
3-HP
3-HP			Seven synthetic pathways, via which 3-HP could be
3-HP			produced at a theoretical yield of 100% from glucose, have
3-HP			been patented by Cargill et al. (Gokarn et al. 2001; Liao et
3-HP			al. 2005; Liao et al. 2007; Marx et al. 2007).
3-HP
3-HP
3-HP
3-HP
3-HP
3-HP
3-HP
3-HP
3-HP
3-HP
3-HP							Fig. 1 Overview of seven fermentation pathways for the production of 3-HP from glucose.
3-HP
3-HP
3-HP	theoretical	theoretical	https://www.mdpi.com/2311-5637/4/1/13
3-HP			Biological Production of 3-Hydroxypropionic Acid: An Update on the Current Status
3-HP			host	ref	yield	unit	engineered strain?	normalization
3-HP			E.coli	Cheng et al. [54]	0.18	g 3-HP/g sugar	y	0.18	g 3-HP/g sugar
3-HP			E.coli	Liu et al. [55]	0.19	g 3-HP/g sugar	y	0.19	g 3-HP/g sugar
3-HP			E.coli	[49]	0.432	g 3-HP/g sugar	y	0.432	g 3-HP/g sugar
3-HP			E.coli	Jung et al. [57]	0.36	g 3-HP/g sugar	y	0.36	g 3-HP/g sugar
3-HP			S. cerevisiae	[59]	0.13	C-mol/C-mol	y	0.065	g 3-HP/g sugar
3-HP			S. cerevisiae	[48]	0.14	C-mol/C-mol	y	0.07	g 3-HP/g sugar
3-HP			S. cerevisiae	[60]	0.29	C-mol/C-mol	y	0.145	g 3-HP/g sugar
3-HP			Corynebacterium glutamicum	Chen et al. [53]	0.45	g 3-HP/g sugar	y	0.45	g 3-HP/g sugar
3-HP			avrg					0.2365
3-HP
3-HP	rice	theoretical	yield g/g sugar	0.2365
3-HP			glucose in rice	82.6667
3-HP			3-HP yield g/g rice	0.195507
3-HP
3-HP	rice hull	theoretical	glucose in rice hull	35.0845
3-HP			yield (3-HP/rice hull )	0.0829749
3-HP
3-HP
3-HP	rice bran	theoretical	glucose in rice bran	16.5926
3-HP			yield (3-HP/rice bran )	0.0392416
3-HP
3-HP
3-HP
3-HP
3-HPA	theoretical	ref 1	https://www.sciencedirect.com/science/article/pii/S0960852423012506?casa_token=2ppI1KsoLjwAAAAA:1-ZHBOVlnQUoaIJWo4fTTZkMD369y0sIhN5iFQW763-tGuMSdTbQ8jCa_g96OvGRgwzDMfQ
3-HPA			Efficient biosynthesis of 3-hydroxypropionic acid from glucose through multidimensional engineering of Escherichia coli
3-HPA			Therefore, biotechnological production of 3-HPA should be performed without glucose, to favour accumulation of 3-HPA (El-Ziney et al. 1998; Lüthi-Peng et al. 2002a; Mills et al. 1954; Sauvageot et al. 2000; Sobolov and Smiley 1960).
3-HPA		ref 2	https://journals.asm.org/doi/full/10.1128/aem.50.6.1444-1450.1985
3-HPA			Optimizing aerobic conversion of glycerol to 3-hydroxypropionaldehyde
3-HPA			Production of 3-HPA was sensitive to the age of cells harvested for resuspension and was nonexistent if cells were cultivated on glucose instead of glycerol as the sole carbon source.
3-HPA
3-HPA
levulinic acid	theoretical	theoretical	https://onlinelibrary.wiley.com/doi/full/10.1002/bbb.267
levulinic acid	theoretical		The conversion of lignocellulosics to levulinic acid
levulinic acid	theoretical		Feed	Theoretical yield (mol %)
levulinic acid	theoretical		fructose	81
levulinic acid	theoretical		glucose	80.7
levulinic acid	theoretical		avrg	80.85
levulinic acid	theoretical
levulinic acid	theoretical		Theoretical yield (g/g)	0.521033
levulinic acid	theoretical
levulinic acid	theoretical
levulinic acid	theoretical
levulinic acid	theoretical
levulinic acid	theoretical
levulinic acid	theoretical
levulinic acid	theoretical
levulinic acid	theoretical
levulinic acid	theoretical
levulinic acid	theoretical
levulinic acid	rice	theoretical	Theoretical yield (g/g hexos)	0.521033
levulinic acid	rice		glu+fru in rice (g/100g)	82.6667
levulinic acid	rice		Theoretical yield (g/g rice)	0.430721
levulinic acid
levulinic acid
levulinic acid
levulinic acid
levulinic acid	rice husk	ref 1	https://www.sciencedirect.com/science/article/pii/S1359511317315532?via%3Dihub
levulinic acid			Concept of rice husk biorefining for levulinic acid production integrating three steps: Multi-response optimization, new perceptions and limitations
levulinic acid			Valuable intermediates for solvents, biofuels and biopolymer precursors are produced from levulinic acid (LA). In this study, rice husk (RH) was fractionated using a three-step biorefining approach for LA production: (1) acid pretreatment, (2) alkaline pretreatment and (3) catalytic depolymerization of cellulose. In third step, the H2SO4-acid concentration (Ad), reaction temperature (Td) and reac…
levulinic acid
levulinic acid			theoretical value (Yt,LA) (mol%)	60.6
levulinic acid
levulinic acid			100 kg of dry Rice Husk produced 11.8 kg of LA
levulinic acid			The RH was provided by the Irmãos Pillon rice industry (Santa Maria, RS − Brazil), obtained from the 2016/2017 rice harvest and with a moisture content of 10.5%.
levulinic acid			LA/ dry rice husk (g/g)	0.118
levulinic acid			moisture content	0.105
levulinic acid			LA/ rice husk (g/g)	0.10561
levulinic acid
levulinic acid
levulinic acid		ref 2	https://www.mdpi.com/2073-4344/10/3/327
levulinic acid			Levulinic Acid Production from Delignified Rice Husk Waste over Manganese Catalysts: Heterogeneous Versus Homogeneous
levulinic acid			Figure 6 and Figure 7 show that the highest yield (wt %) of levulinic acid for each reaction was reached after 8 h reaction time. When using Mn3O4/hierarchical ZSM-5 as catalyst, the yield (wt %) obtained at 100 °C and 130 °C was 27.60% and 39.75%, respectively. The reaction using Mn2+ gave yield of 17.69% (100 °C) and 19.34% (130 °C). When Mn3O4 catalyst, the highest yield (wt %) of levulinic ac…
levulinic acid			The yield (wt%) of products was calculated using the following Equation:
levulinic acid
levulinic acid
levulinic acid
levulinic acid
levulinic acid
levulinic acid
levulinic acid			yield (wt %)	0.276
levulinic acid			yield (wt %)	0.3975
levulinic acid			yield (wt %)	0.1769
levulinic acid			yield (wt %)	0.1934
levulinic acid			yield (wt %)	0.1402
levulinic acid			yield (wt %)	0.1593
levulinic acid			avrg yield (wt %)	0.223883
levulinic acid
levulinic acid			cellulsoe in Rice husk %	25.6726
levulinic acid			yield g LA / g rice husk	0.0574768
levulinic acid
levulinic acid
levulinic acid		ref 3	https://www.sciencedirect.com/science/article/pii/S2214785323006041?via%3Dihub#s0010
levulinic acid			Bronsted acid and manganese based catalyst effect on levulinic acid production from double delignified rice husk
levulinic acid			Calculation of the LA based on a molar basis (YLA) is formulated in equation (1) as the ratio between the concentration of LA in the product (CLA) and the concentration of sugar C6 in rice husk (CC6,0).
levulinic acid
levulinic acid
levulinic acid
levulinic acid
levulinic acid			The yields obtained from the use of 10 %wt, 20 %wt and 30 %wt Mn3O4/ZSM-5 catalyst concentrations were 62.3 %, 65.85 % and 66.05 %,
levulinic acid			YLA	0.623
levulinic acid			YLA	0.6585
levulinic acid			YLA	0.6605
levulinic acid			avrg	0.647333
levulinic acid			C6 sugar in rice, %	35.0845
levulinic acid			mol weight, C6 sugar	180
levulinic acid			mol weight, levulinic acid	116
levulinic acid			yield g/g rice husk	0.146362
levulinic acid
levulinic acid
levulinic acid		ref 4	https://link.springer.com/article/10.1007/s10570-020-03183-w
levulinic acid			Kinetic insights into the lignocellulosic biomass-based levulinic acid production by a mechanistic model
levulinic acid			RH rice husk
levulinic acid
levulinic acid			For all ISRs, the cellulose depolymerization conditions at 150 °C with low concentration of H2SO4 were unfavorable for the formation of LA; this resulted in lower yields of 12.2 ± 0.0 mol%, 28.8 ± 3.5 mol% and 25.8 ± 1.4 mol% for ISRSCB, ISRRH and ISRSS, respectively.
levulinic acid			However, LA yields were observed at 190 °C and H2SO4 concentration of 3.0% w/v, resulting in values of 28.6 ± 1.0 mol%, 61.8 ± 0.2 mol%, and 55.6 ± 0.4 mol% for ISRSCB, ISRRH and ISRSS, respectively
levulinic acid			ven greater LA yields were observed at 190 °C and 7.0% w/v H2SO4 concentration: 60.5 ± 2.1 mol%, 65.2 ± 2.9 mol% and 61.5 ± 4.0 mol% for ISRSCB, ISRRH and ISRSS, respectively.
levulinic acid			LA yield from ISRRH (mol% )	28.8
levulinic acid			LA yield from ISRRH (mol% )	61.8
levulinic acid			LA yield from ISRRH (mol% )	65.2
levulinic acid			avrg LA yield from ISRRH (mol% )	51.9333
levulinic acid			avrg LA yield from ISRRH	0.519333
levulinic acid			C6 sugar in rice, %	35.0845
levulinic acid			mol weight, C6 sugar	180
levulinic acid			mol weight, levulinic acid	116
levulinic acid			yield g/g rice husk	0.117421
levulinic acid
levulinic acid
levulinic acid	rice bran	theoretical	Theoretical yield (g/g hexos)	0.521033
levulinic acid			glu+fru in rice bran (g/100g)	19.8162
levulinic acid			Theoretical yield (g/g rice bran)	0.103249
levulinic acid
levulinic acid
levulinic acid
lactic acid	rice grain	theoretical	https://link.springer.com/article/10.1007/s10570-019-02571-1
lactic acid			Bioprocessing of rice husk into monosaccharides and the fermentative production of bioethanol and lactate
lactic acid			YLA lactic acid yield expressed as percentage of theoretical lactic acid yield (0.76 g lactic acid per g sugar)
lactic acid			theoretical yield (g lactic acid per g sugar)	0.76
lactic acid			sugar from rice g/g	82.6667
lactic acid			theoretical yield (g lactic acid per g rice)	0.628267
lactic acid
lactic acid	rice husk	ref 1	https://analyticalsciencejournals.onlinelibrary.wiley.com/doi/full/10.1002/jctb.1797
lactic acid			Hydrothermal catalytic conversion of biomass for lactic acid production
lactic acid
lactic acid			rice husk	Yield (%)
lactic acid			0	4.5	Cr
lactic acid			200	5.45	Cr
lactic acid			400	6.71	Cr
lactic acid			600	5.39	Cr
lactic acid			800	4.41	Cr
lactic acid			0	4.53	Ni
lactic acid			200	5.04	Ni
lactic acid			400	5.45	Ni
lactic acid			600	4.9	Ni
lactic acid			800	3.92	Ni
lactic acid			0	4.53	Zn
lactic acid			200	3.19	Zn
lactic acid			400	1.77	Zn
lactic acid			600	1.35	Zn
lactic acid			800	0.49	Zn
lactic acid			avrg yield	4.10867
lactic acid			yield g/g	0.0410867
lactic acid
lactic acid
lactic acid		ref 2	https://www.sciencedirect.com/science/article/pii/S0141813023060531
lactic acid			Bioconversion of spray corn husks into L-lactic acid with liquid hot water pretreatment
lactic acid
lactic acid
lactic acid
lactic acid
lactic acid
lactic acid
lactic acid
lactic acid
lactic acid
lactic acid
lactic acid
lactic acid
lactic acid
lactic acid
lactic acid
lactic acid
lactic acid
lactic acid
lactic acid
lactic acid
lactic acid
lactic acid
lactic acid
lactic acid			yield g/100g RH	6.79
lactic acid			yield g/g RH	0.0679
lactic acid
lactic acid
lactic acid		ref 3	https://www.hindawi.com/journals/bmri/2013/934171/#conclusions
lactic acid			Optimization of Sulfide/Sulfite Pretreatment of Lignocellulosic Biomass for Lactic Acid Production
lactic acid			Table 5
lactic acid			Kinetic parameters of lactic acid fermentations during batch culturing of Lactobacillus acidophilus.
lactic acid
lactic acid			Substrate	Reagent for pretreatment	γ (initial sugar conc.)	γ (lactic acid)	η (lactic acid)	Productivity
lactic acid					gL−1	gL−1	gg−1	gL−1·h−1
lactic acid
lactic acid			Corncob	Na2S	40		0.76	0.44
lactic acid				Na2SO3	40		0.75	0.4
lactic acid			Bagasse	Na2S	40		0.76	0.42
lactic acid				Na2SO3	40		0.76	0.42
lactic acid			Water hyacinth	Na2S	40		0.86	0.52
lactic acid				Na2SO3	40		0.86	0.52
lactic acid			Rice husk	Na2S	40		0.83	0.5
lactic acid				Na2SO3	40		0.83	0.5
lactic acid			Glucose	No treatment	40		0.96	0.59
lactic acid
lactic acid			η (lactic acid) = lactic acid produced/sugar consumed (g/g).
lactic acid
lactic acid			η (lactic acid)	0.83
lactic acid			sugar from rice husk	48.0727
lactic acid			yield g/g rice husk	0.399003
lactic acid
lactic acid
lactic acid		ref 4	https://link.springer.com/article/10.1007/s00449-021-02591-x
lactic acid			Enhanced lactic acid production from P2O5-pretreated biomass by domesticated Pediococcus pentosaceus without detoxification
lactic acid
lactic acid			Table 4 Comparison of lactic acid production from different biomass hydrolysates by fed-batch fermentation
lactic acid			From: Enhanced lactic acid production from P2O5-pretreated biomass by domesticated Pediococcus pentosaceus without detoxification
lactic acid			Types of biomass hydrolysates	LA (g/L)	LA conversion rate (%)	maximum productivity (g/L/h)
lactic acid			CS Corn stalk	29.8	82.2	3.4
lactic acid			CSR corn stalk residue	31.1	96.3	2.9
lactic acid			RHR Rice husk residue	46.2	99.2	3.3
lactic acid
lactic acid			glu+xyl in rice husk %	48.0727
lactic acid			LA conversion rate (%)	99.2
lactic acid			Yield g LA/ g rice husk	0.476881
lactic acid
lactic acid
lactic acid		ref 5	https://link.springer.com/article/10.1007/s10570-019-02571-1
lactic acid			Bioprocessing of rice husk into monosaccharides and the fermentative production of bioethanol and lactate
lactic acid
lactic acid			Table 2 Lactic acid yield using Lactobacillus buchneri NRRL B-30929 after 32 h of fermentation
lactic acid			Lactic acid (g L−1)	YX/S (g g−1)	YLA/S (g g−1)	YLA (%)	PV (g L−1 h−1)	µX (h−1)	µS (g g−1 h−1)	µP (g g−1 h−1)
lactic acid			12.69	0.27	0.53	70.13	0.44	0.07	0.14	0.09
lactic acid
lactic acid			YX/S ratio yield of cells per substrate referred as g biomass per g sugar in the liquor (calculated at 20 h), YLA/S ratio yield of product per substrate referred as g lactic acid per g sugar present in the liquor, YLA lactic acid yield expressed as percentage of theoretical lactic acid yield (0.76 g lactic acid per g sugar), PV volumetric productivity (calculated at 28 h), µXm maximum specific ra…
lactic acid			YLA/S ratio yield of product per substrate referred as g lactic acid per g sugar present in the liquor
lactic acid			YLA lactic acid yield expressed as percentage of theoretical lactic acid yield (0.76 g lactic acid per g sugar)
lactic acid
lactic acid			YLA/S (g g−1)	0.53
lactic acid			sugar from rice husk	48.0727
lactic acid			yield g/g rice husk	0.254785
lactic acid
lactic acid
lactic acid
lactic acid
lactic acid
lactic acid
lactic acid	rice bran	ref 1	https://pubs.rsc.org/en/content/articlelanding/2014/ra/c3ra46140h
lactic acid			Fermentative l-(+)-lactic acid production from defatted rice bran
lactic acid
lactic acid			Table 3 Results obtained in shaking flask experiments
lactic acid			Medium number	Lactate yield on glucose%a	Substrate use %b	Lactic acid g L−1	Productivity g L−1 h−1
lactic acid			1	97.20 ± 0.14	96.15 ± 2.31	140.18 ± 2.12	2.00 ± 0.06
lactic acid			2	93.00 ± 0.36	71.43 ± 0.05	99.64 ± 0.35	1.42 ± 0.01
lactic acid			3	95.00 ± 0.41	78.30 ± 1.33	111.58 ± 1.41	1.59 ± 0.03
lactic acid			4	80.21 ± 0.22	43.95 ± 3.14	52.88 ± 2.83	0.76 ± 0.08
lactic acid			5	94.36 ± 0.20	95.07 ± 1.35	134.56 ± 1.43	1.92 ± 0.03
lactic acid			6	87.42 ± 0.34	53.58 ± 1.07	70.26 ± 1.26	1.00 ± 0.02
lactic acid			7	89.00 ± 0.06	70.05 ± 2.53	93.52 ± 2.24	1.34 ± 0.07
lactic acid			8	80.31 ± 0.51	52.89 ± 0.74	63.71 ± 0.71	0.91 ± 0.02
lactic acid			9	95.20 ± 0.31	89.36 ± 0.17	127.61 ± 0.25	1.82 ± 0.01
lactic acid			10	95.37 ± 0.78	94.86 ± 2.28	135.70 ± 2.09	1.94 ± 0.05
lactic acid			11	95.97 ± 0.06	95.43 ± 1.17	137.38 ± 1.34	1.96 ± 0.02
lactic acid			12	95.60 ± 0.09	95.55 ± 1.21	137.02 ± 1.36	1.96 ± 0.02
lactic acid			13	96.00 ± 0.91	96.24 ± 0.52	138.59 ± 0.64	1.98 ± 0.01
lactic acid			14	85.45 ± 0.37	87.61 ± 2.04	112.29 ± 2.01	1.60 ± 0.04
lactic acid			15	96.10 ± 0.27	95.98 ± 1.52	138.36 ± 1.56	1.98 ± 0.03
lactic acid			a Lactate yield on glucose = total lactic acid obtained (g)/total glucose consumed (g). b Substrate use = total glucose consumed (g)/initial glucose (g).
lactic acid
lactic acid
lactic acid			Medium number	Lactate yield on glucose%a
lactic acid			1	97.2
lactic acid			2	93
lactic acid			3	95
lactic acid			4	80.21
lactic acid			5	94.36
lactic acid			6	87.42
lactic acid			7	89
lactic acid			8	80.31
lactic acid			9	95.2
lactic acid			10	95.37
lactic acid			11	95.97
lactic acid			12	95.6
lactic acid			13	96
lactic acid			14	85.45
lactic acid			15	96.1
lactic acid			avrg	91.746
lactic acid
lactic acid			glucose in rice bran %	16.5926
lactic acid			yield on rice bran	0.152231
lactic acid
lactic acid
lactic acid		ref 2	https://www.sciencedirect.com/science/article/pii/S0960852407005731?via%3Dihub
lactic acid			Utilization of rice bran as nutrient source for fermentative lactic acid production
lactic acid			Yield of lactic acid was defined as amount of lactic acid divided by total amount of glucose and productivity as lactic acid concentration divided by fermentation time.
lactic acid			When 3 and 5 g/L YE were added, there arose final lactic acid concentrations of 83 and 87 g/L, yields of 96% and 98%, productivities of 1.99 and 2.66 g/Lh, which were much higher than those from the fermentation with rice bran only (final lactic acid concentration, 68 g/L; yield, 68% and productivity, 0.27 g/Lh at pH 0.5).
lactic acid			Yield %	68
lactic acid			glucose in rice bran %	16.5926
lactic acid			yield on rice bran	0.11283
lactic acid
lactic acid
lactic acid		ref 3	https://www.sciencedirect.com/science/article/pii/S1389172312004525?via%3Dihub
lactic acid			Fermentative l-(+)-lactic acid production from non-sterilized rice washing drainage containing rice bran by a newly isolated lactic acid bacteria without any additions of nutrients
lactic acid			hence, yield based on consumed glucose attained was 0.85 g lactic acid/g glucose
lactic acid			Yield %	85
lactic acid			glucose in rice bran %	16.5926
lactic acid			yield on rice bran	0.141037
lactic acid
lactic acid
lactic acid		ref 4	https://www.sciencedirect.com/science/article/pii/S096085241501278X?via%3Dihub#t0005
lactic acid			Open fermentative production of l-lactic acid using white rice bran by simultaneous saccharification and fermentation
lactic acid			Table 1. Comparison between lactic acid production based on WRB in this work and those reported in the literature.
lactic acid			Parameter	Gao et al. (2008)	Tanaka et al. (2006)	Taniguchi et al. (2005)	Li et al. (2012)	This work
lactic acid			Substrate	Rice bran, glucose	Defatted rice bran	Defatted rice bran	White rice bran	White rice bran
lactic acid			Strain	Lactobacillus rhamnosus (NBRC 3863)	L. delbrueckii IFO 3202	Lactobacillus rhamnosus (No. 16 screened from defatted rice bran)	Lactobacillus rhamnosus (LA-04-01)	Bacillus coagulans LA-15-2
lactic acid			Fermentation mode	Batch	Batch (SSF)	Batch (SSF)	Fed-batch	Batch (SSF)
lactic acid			T and pH	42 °C, pH 6.0	37 °C, pH 5.0	37 °C, pH 4.5	42 °C, pH 6.25	50 °C, pH rise from 5.60 to 5.80
lactic acid			Sterilization	Y	N	N	Y	N
lactic acid			Inorganic salts	Na	N	N	N	N
lactic acid			Yeast extract	Yb	N	N	N	N
lactic acid			Corn steep liquor powder/corn steep liquor	N	N	N	Y	Y
lactic acid			Amylase	N	Y	Y	Y	Y
lactic acid			Glucoamylase	N	N	N	Y	Y
lactic acid			Cellulase	N	Y	Y	N	N
lactic acid			Acid-hydrolysis by H2SO4	Y	N	N	Y	N
lactic acid			Yield of product	0.98	0.78	–	0.71	0.9875	0.864375
lactic acid			Productivity	2.66 g L−1 h−1	0.78 g L−1 h−1	0.39 g L−1 h−1	1.95 g L−1 h−1	2.79 g L−1 h−1
lactic acid			Lactic acid concentration and optical configuration	87 g L−1	28 g L−1	27.9 g L−1	123 g L−1	117 g L−1
lactic acid				l-lactic acid	d-lactic acid	l-lactic acid	l-lactic acid	l-lactic acid
lactic acid			a
lactic acid			No addition or not adopted.
lactic acid			b
lactic acid			Addition or adopted.
lactic acid
lactic acid
lactic acid			avrg yield %	86
lactic acid			glucose in rice bran %	16.5926
lactic acid			yield on rice bran	0.142697
lactic acid
lactic acid
lactic acid		ref 5	https://pubs.rsc.org/en/content/articlelanding/2015/ra/c4ra04641b
lactic acid			Continuous l-lactic acid production from defatted rice bran hydrolysate using corn stover bagasse immobilized carrier
lactic acid			As a result, a maximal concentration of 88 g L−1 of LLA with an average yield of 0.95 g g−1 and productivity of 5.20 g L−1 h−1 were achieved in a single-stage immobilized repeated-batch fermentation.
lactic acid
lactic acid			average yield (g g−1)	0.95
lactic acid			glucose in rice bran %	16.5926
lactic acid			yield on rice bran	0.15763
sorbitol	theoretical	theoretical	https://link.springer.com/article/10.1007/s00253-002-1046-0
sorbitol			The biotechnological production of sorbitol
sorbitol			Table 1 Examples of experimental studies on the bio-production of sorbitol and gluconic acid using Zymomonas mobilis cells. D Dilution rate in continuous processing
sorbitol
sorbitol
sorbitol
sorbitol
sorbitol
sorbitol
sorbitol
sorbitol
sorbitol
sorbitol
sorbitol
sorbitol
sorbitol
sorbitol
sorbitol
sorbitol
sorbitol
sorbitol
sorbitol
sorbitol
sorbitol
sorbitol
sorbitol
sorbitol
sorbitol
sorbitol
sorbitol
sorbitol
sorbitol
sorbitol
sorbitol
sorbitol				conversion yield
sorbitol				sorbitol yield %
sorbitol				94.3
sorbitol				92
sorbitol				100
sorbitol				99
sorbitol				98
sorbitol				92.1
sorbitol				91
sorbitol			avrg mol conversion of glucose and fructose %	95.2
sorbitol			yield g/g glucose and fructose	0.962578
sorbitol
sorbitol
sorbitol	rice	theoretical	https://link.springer.com/article/10.1007/s00253-002-1046-0
sorbitol			The biotechnological production of sorbitol
sorbitol			avrg conversion of glucose and fructose %	95.2
sorbitol			yield g/g glucose and fructose	0.962578
sorbitol			glu+ fru in rice %	82.6667
sorbitol			yield g/g rice	0.795731
sorbitol
sorbitol
sorbitol	rice hull	theoretical	https://link.springer.com/article/10.1007/s00253-002-1046-0
sorbitol			The biotechnological production of sorbitol
sorbitol			avrg conversion of glucose and fructose %	95.2
sorbitol			yield g/g glucose and fructose	0.962578
sorbitol			glu+ fru in rice hull%	35.0845
sorbitol			yield g/g rice hull	0.337716
sorbitol
sorbitol	rice bran	theoretical	https://link.springer.com/article/10.1007/s00253-002-1046-0
sorbitol			The biotechnological production of sorbitol
sorbitol			avrg conversion of glucose and fructose %	95.2
sorbitol			yield g/g glucose and fructose	0.962578
sorbitol			glu+ fru in rice bran %	19.8162
sorbitol			yield g/g rice bran	0.190746
sorbitol
xylitol	theoretical	theoretical	https://www.sciencedirect.com/science/article/pii/S0922338X98800263?casa_token=aLqBeV90biIAAAAA:uqYoRDUYXPdbjyYra-122gWl9FVoabLSx-h_EHf6fDpWVOsKLf0qIS6Sd5kzioR63hHTDi8
xylitol			Microbial conversion of d-xylose to xylitol
xylitol
xylitol
xylitol
xylitol
xylitol
xylitol
xylitol
xylitol
xylitol
xylitol
xylitol
xylitol
xylitol
xylitol
xylitol
xylitol
xylitol
xylitol
xylitol
xylitol
xylitol
xylitol
xylitol			Yx/s (g/g)	0.53	0.44	0.22
xylitol				0.12	0.29	0.47	0.22
xylitol				0.62	0.63	0.74	0.74
xylitol				0.45	0.49	0.58	0.69
xylitol				0.17	0.5	0.7	0.59
xylitol				0.61	0.58	0.31
xylitol			avrg Yx/s (g xylitol/g xylose)	0.485909
xylitol
xylitol
xylitol	rice	theoretical	https://www.sciencedirect.com/science/article/pii/S0922338X98800263?casa_token=aLqBeV90biIAAAAA:uqYoRDUYXPdbjyYra-122gWl9FVoabLSx-h_EHf6fDpWVOsKLf0qIS6Sd5kzioR63hHTDi8
xylitol			Microbial conversion of d-xylose to xylitol
xylitol			avrg Yx/s (g xylitol/g xylose)	0.485909
xylitol			xylose in rice %	0
xylitol			yield (g xylitol / g rice)	0
xylitol
xylitol	rice hull	ref 1	https://link.springer.com/article/10.1007/s13399-024-05372-0
xylitol			Optimization of xylitol production through Candida tropicalis in xylose hydrolysate from rice husk
xylitol
xylitol			Table 5 Fermentation parameters in other studies with rice husk, feedstocks with similar composition, and synthetic mediums through Candida spp
xylitol			From: Optimization of xylitol production through Candida tropicalis in xylose hydrolysate from rice husk
xylitol			Feedstock	Microorganism	Xylitol (g/L)	YP/S* (g/g)	Reference
xylitol			Rice husk	Candida guilliermondii	N/A	0.4	[49]
xylitol			Rice husk	Candida tropicalis	N/A	0.08	[49]
xylitol			Rice husk	Candida guilliermondii	2.6	0.13	[72]
xylitol			Rice husk	Candida guilliermondii	45.2	0.57	[44]
xylitol			Rice straw	Candida tropicalis MTCC 6192	25.83	0.6	[54]
xylitol			Rice straw	Candida tropicalis NCIM 3119	26.5	0.58	[55]
xylitol			Chestnut shell	Candida tropicalis M43	18.08	0.24	[68]
xylitol			Sugarcane trash	Candida tropicalis InaCC Y799	11.27	0.56	[31]
xylitol			Rapeseed straw	Candida guilliermondii ATCC 201 935	N/A	0.42	[57]
xylitol			Synthetic medium	Candida tropicalis	36.25	0.72	[83]
xylitol			Semi-synthetic medium	Candida tropicalis	36	0.7	[84]
xylitol			Rice husk	Candida tropicalis ATCC 1369	36.74	0.58	This study
xylitol			N/A information not available; *g xylitol/g xylose
xylitol				YP/S* (g/g)
xylitol			Rice husk	0.4
xylitol			Rice husk	0.08
xylitol			Rice husk	0.13
xylitol			Rice husk	0.57
xylitol			Rice husk	0.58
xylitol			avrg	0.352
xylitol			xylose in rice husk %	12.9882
xylitol			yield g xylitol/g rice husk	0.0457184
xylitol
xylitol
xylitol		ref 2	https://link.springer.com/article/10.1007/s11274-016-2166-5
xylitol			The yeast Scheffersomyces amazonensis is an efficient xylitol producer
xylitol			Table 1 Substrate (D-xylose, glucose) consumption, product (xylitol, ethanol, biomass) formation, and xylitol yield and volumetric productivity in Scheffersomyces amazonensis UFMG-CM-Y493T cultures in D-xylose-supplemented (YPX) medium and rice hull hydrolysate (RHH) under moderate and severe oxygen-limited conditions
xylitol			Oxygen-limited conditions	Culture mediuma	D-Xylose (%)b	Glucose (%)b	Cell biomass (g L−1 or CFU mL−1)c	Ethanol (g L−1)	Xylitol (g L−1)	Time of maximum xylitol (h)d	Yxylp/s (g g−1)e	Qxylp (g L−1 h)f
xylitol			Moderate	YPX	98.52	–	6.33 ± 0.62	4.71 ± 0.10	26.37 ± 0.24	36	0.554	0.732
xylitol				RHH	97.08	100	6.23 × 109	2.59 ± 0.71	2.96 ± 0.78	96	0.129	0.031
xylitol			Severe	YPX	100	–	3.03 ± 0.57	3.61 ± 0.01	34.24 ± 0.16	72	0.748	0.476
xylitol				RHH	39.36	100	1.61 × 108	2.20 ± 0.28	6.30 ± 0.53	120	1.036	0.053
xylitol			aYPX: D-xylose (50 g L−1) supplemented medium; RHH: rice hull hydrolysate (20 g L−1 D-xylose, 4.6 g L−1 D-glucose, 3.8 g L−1 L-arabinose)
xylitol			b D-Xylose or glucose consumption (%): percentage of initial D-xylose or glucose consumed
xylitol			cCell biomass: cell concentration in YPX medium (g L−1) or RHH (CFU mL−1)
xylitol			dTime when the maximum xylitol production (g L−1) value was attained
xylitol			eYxylp/s (g g−1): xylitol yield: correlation between xylitol (ΔP) produced and D-xylose (ΔS) consumed
xylitol			fQxylp (g L−1 h−1): xylitol volumetric productivity: ratio of xylitol concentration (g L−1) and time (h) of achieving maximum xylitol production
xylitol
xylitol			avrg Yxylp/s (g g−1)	0.5825
xylitol			xylose in rice husk %	12.9882
xylitol			yield g xylitol/g rice husk	0.0756562
xylitol
xylitol	rice bran	theoretical	https://www.sciencedirect.com/science/article/pii/S0922338X98800263?casa_token=aLqBeV90biIAAAAA:uqYoRDUYXPdbjyYra-122gWl9FVoabLSx-h_EHf6fDpWVOsKLf0qIS6Sd5kzioR63hHTDi8
xylitol			Microbial conversion of d-xylose to xylitol
xylitol			avrg Yx/s (g xylitol/g xylose)	0.485909
xylitol			xylose in rice bran %	6.74492
xylitol			yield (g xylitol / g rice bran)	0.0327742

## Sheet: apple
Ethanol	Apple	ref 1	https://link.springer.com/article/10.1007/s12155-023-10627-1
Ethanol	Apple
Ethanol	Apple		Table 4 Main results of the process simulation
Ethanol	Apple		From: Techno-Economic Evaluation for Ethanol Production from Residual Cashew Apple Using a Flocculant Yeast
Ethanol	Apple			Quantity
Ethanol	Apple			Scenario I	Scenario II	Unit
Ethanol	Apple		Raw material
Ethanol	Apple		Cashew apple	31500	31500	ton/year
Ethanol	Apple		Consumables
Ethanol	Apple		Sodium hypochlorite	416.3	416.3	kg/year
Ethanol	Apple		Sulfuric acid	4199.4	4199.4	kg/year
Ethanol	Apple		Yeast	415	415	kg/year
Ethanol	Apple		Utilities
Ethanol	Apple		Electricity	2164.4	2164.4	MWh/year
Ethanol	Apple		Steam	9730	6738	ton/year
Ethanol	Apple		Water	94446	61782	m3/year
Ethanol	Apple		Global parameters
Ethanol	Apple		Raw material flow	14.27	14.27	ton/h
Ethanol	Apple		Total recoverable sugar	104	104	kg/ton RM
Ethanol	Apple		Fuel ethanol production	949.21	-	L/h
Ethanol	Apple		Hydrated ethanol production	-	1268.06	L/h
Ethanol	Apple		Ethanol production by raw material	66.5	88.9	L/ton
Ethanol	Apple		avrg (L/ton)	77.7
Ethanol	Apple		density (g/L)	784.8
Ethanol	Apple		yield (g ethanol/g raw material)	0.060979
Ethanol	Apple
Ethanol	Apple	ref 2	https://link.springer.com/article/10.1007/s12010-009-8781-y#Tab1
Ethanol	Apple
Ethanol	Apple		Table 1 Fermentation parameters obtained in batch fermentation of cashew apple juice with free and immobilized S. cerevisiae at 30 °C.
Ethanol	Apple		From: Ethanol Production by Fermentation Using Immobilized Cells of Saccharomyces cerevisiae in Cashew Apple Bagasse
Ethanol	Apple		System	Time (h)	Initial sugar (g L−1)	Residual sugar (g L−1)	Ethanol (g L−1)	QP(g L−1h−1)	YP/S(g g−1)	η(%)
Ethanol	Apple		Free	9	86.06 ± 2.98	3.77 ± 0.62	38.57 ± 2.51	4.29 ± 0.28	0.47	88.95
Ethanol	Apple		Immobilized (fourthbatch)	6	70.01 ± 7.70	3.92 ± 0.27	36.91 ± 0.24	6.15 ± 2.05	0.49	95.98
Ethanol	Apple		yield of ethanol on consumed sugar (Y P/S, g g−1)
Ethanol	Apple
Ethanol	Apple		avrg yied (g g−1)						0.48
Ethanol	Apple		total sugar (g g−1 apple)						0.139693
Ethanol	Apple		yield (g ethanol/g raw material)						0.0670527
Ethanol	Apple
Ethanol	Apple
Ethanol	Apple	ref 3	https://www.sciencedirect.com/science/article/pii/S0960852414016125?via%3Dihub#t0020
Ethanol	Apple		Enhanced enzymatic hydrolysis and ethanol production from cashew apple bagasse pretreated with alkaline hydrogen peroxide
Ethanol	Apple
Ethanol	Apple
Ethanol	Apple
Ethanol	Apple
Ethanol	Apple
Ethanol	Apple
Ethanol	Apple
Ethanol	Apple
Ethanol	Apple
Ethanol	Apple
Ethanol	Apple
Ethanol	Apple
Ethanol	Apple
Ethanol	Apple
Ethanol	Apple
Ethanol	Apple
Ethanol	Apple
Ethanol	Apple
Ethanol	Apple
Ethanol	Apple
Ethanol	Apple
Ethanol	Apple
Ethanol	Apple
Ethanol	Apple
Ethanol	Apple
Ethanol	Apple
Ethanol	Apple
Ethanol	Apple
Ethanol	Apple
Ethanol	Apple
Ethanol	Apple
Ethanol	Apple
Ethanol	Apple
Ethanol	Apple
Ethanol	Apple
Ethanol	Apple		SSF yield g	7.42
Ethanol	Apple		SHF yield g	6.18
Ethanol	Apple		yield g ethanol /g apple bagasse	0.068
Ethanol	Apple
Ethanol	Apple
Ethanol	Apple	ref 4	https://docserver-ingentaconnect-com.ezproxy.library.wur.nl/deliver/connect/asp/15566560/v8n1/s14.pdf?expires=1708548221&id=0000&titleid=72010009&checksum=69ED311529DC2160386D3FBC70F6C858&host=https://www-ingentaconnect-com.ezproxy.library.wur.nl
Ethanol	Apple		Use of Cashew Apple Bagasse as Support for Saccharomyces cerevisiae Cells Immobilization for Ethanol Production
Ethanol	Apple		Table III. Storage effects: fermentation parameters of seven consecutive batches for ethanol production from cashew apple juice using immobilized yeasts in CAB. Fermentation time = 6 h and initial cell density= 1_x0006_13×108 cells g−1 of CAB. Cells were stored for 21 at 4 C before each batch.
Ethanol	Apple		Batch	YP /S (g/g)
Ethanol	Apple		1	0.48
Ethanol	Apple		2	0.49
Ethanol	Apple		3	0.45
Ethanol	Apple		4	0.45
Ethanol	Apple		5	0.45
Ethanol	Apple		6	0.41
Ethanol	Apple		7	0.48
Ethanol	Apple		avrg YP /S (g/g consumed sugar)	0.458571
Ethanol	Apple		total sugar (g g−1 apple)	0.139693
Ethanol	Apple		Yield (g ethanol/ g apple)	0.0640593
Ethanol	Apple
Ethanol	Apple	ref 5	https://www.scopus.com/record/display.uri?eid=2-s2.0-80051684112&origin=resultslist&sort=r-f&src=s&sid=8e2249bd6afc38b3a5c479f5c24fcb22&sot=b&sdt=b&s=TITLE-ABS-KEY%28%28+%22apple%22+%29+AND+%28+%22ethanol+production%22+%29%29&sl=104&sessionSearchId=8e2249bd6afc38b3a5c479f5c24fcb22&relpos=10
Ethanol	Apple		Cashew apple bagasse as a source of sugars for ethanol production by Kluyveromyces marxianus CE025
Ethanol	Apple		Table 1 Alcoholic fermentation of CABH by K. marxianus CE025: effect of temperature on kinetic parameters
Ethanol	Apple		Parameters	30C	34C	37C	40C
Ethanol	Apple		YG P/S1 (g ethanol/g glucose)	0.417 ± 0.003	0.375 ± 0.004	0.385 ± 0.017	0.273 ± 0.017
Ethanol	Apple		YP/S (g ethanol/g sugar)	0.341 ± 0.017	0.275 ± 0.067	0.302 ± 0.007	0.190 ± 0.020
Ethanol	Apple		YP/X (g g-1 )	1.515 ± 0.107	1.064 ± 0.120	1.535 ± 0.119	1.234 ± 0.330
Ethanol	Apple		PE (g l-1 h-1 )	0.257 ± 0.002	0.205 ± 0.015	0.236 ± 0.001	0.132 ± 0.010
Ethanol	Apple		Overall yields of ethanol based on glucose consumption YG P=S1 and based on glucose ? xylose consumption (YP/S), overall yield of ethanol based on biomass (YP/X), and ethanol productivity (PE )
Ethanol	Apple
Ethanol	Apple		YP/S (g ethanol/g sugar)	0.341	0.275	0.302	0.19
Ethanol	Apple		avrg YP/S (g ethanol/g sugar)	0.277
Ethanol	Apple		total sugar (g g−1 apple)	0.139693
Ethanol	Apple		Yield (g ethanol/ g apple)	0.038695
Ethanol
Ethanol
Ethanol	Apple pomace	ref 1	https://www.sciencedirect.com/science/article/pii/S0016236120327812?via%3Dihub#t0010
Ethanol	Apple pomace		Usage of soluble soy protein on enzymatically hydrolysis of apple pomace for cost-efficient bioethanol production
Ethanol	Apple pomace		Table 2. Kinetic parameters belong to the S. cerevisiae and K. marxinanus (Pretreatment Conditions: 1% H2SO4, 121 °C, 15 min, biomass loading: 20%, pH:4.8).
Ethanol	Apple pomace		Empty Cell		Enzyme loading (FPU/g substate)	SSP loading (mg/g substrate)	Theoretical yield (%)	Qp g/L.h	YP/S g/g
Ethanol	Apple pomace		S. cerevisiae	Washed Slurry	15	0	82	0.59	0.45
Ethanol	Apple pomace			Whole Slurry	15	0	68.5	0.84	0.46
Ethanol	Apple pomace				30	0	70.3	0.9	0.43
Ethanol	Apple pomace				60	0	60.8	0.91	0.42
Ethanol	Apple pomace					20	57.1	0.9	0.4
Ethanol	Apple pomace					40	56.8	1.02	0.46
Ethanol	Apple pomace					80	58.9	1.1	0.47
Ethanol	Apple pomace					160	49	0.78	0.38
Ethanol	Apple pomace				120	0	66.1	1.09	0.42
Ethanol	Apple pomace		K. marxianus	Washed Slurry	15	0	43.2	0.62	0.35
Ethanol	Apple pomace			Whole Slurry	15	0	35.4	0.87	0.31
Ethanol	Apple pomace				30	0	34.7	0.89	0.36
Ethanol	Apple pomace				60	0	33.8	1.01	0.37
Ethanol	Apple pomace					20	33.9	1.07	0.34
Ethanol	Apple pomace					40	31.6	1.14	0.28
Ethanol	Apple pomace					80	32.8	1.23	0.29
Ethanol	Apple pomace					160	27.7	0.89	0.28
Ethanol	Apple pomace				120	0	3.7	0.12	0.02
Ethanol	Apple pomace		avrg						0.360556
Ethanol	Apple pomace		total sugar (g g−1 apple pomace)						0.67391
Ethanol	Apple pomace		Yield (g ethanol/ g apple pomace)						0.242982
Ethanol	Apple pomace
Ethanol	Apple pomace	ref 2	https://www.sciencedirect.com/science/article/pii/S0961953420303202?via%3Dihub#tbl2
Ethanol	Apple pomace		Valorization of apple pomaces for biofuel production: A biorefinery approach
Ethanol	Apple pomace		Table 2. Bioethanol fermentation parameters for the different strains with hydrolysate of AP1. Averages and standard deviations are shown. Statistical differences (p < 0.05) for bioethanol concentrations are indicated with superscripts (a, b, c).
Ethanol	Apple pomace		Species	Strain	Bioethanol (g L−1)	Acetic acid (g L−1)	Total sugar consumption (%)	Y E/S (g g−1)	WE (g L−1 h−1)	Y E/S (g g−1)
Ethanol	Apple pomace		Kluyveromyces lactis	DSM 70799	49.9 ± 0.5a	3.77 ± 0.10	80.0 ± 0.5	0.402 ± 0.006	0.694 ± 0.007	0.402
Ethanol	Apple pomace		Kluyveromyces marxianus	DSM 5418	50.5 ± 0.6a	6.73 ± 0.09	78.8 ± 0.4	0.412 ± 0.003	0.701 ± 0.008	0.412
Ethanol	Apple pomace		Kluyveromyces marxianus	DSM 5422	50.1 ± 0.8a	4.79 ± 0.21	78.6 ± 0.2	0.410 ± 0.005	0.695 ± 0.011	0.41
Ethanol	Apple pomace		Kluyveromyces marxianus	DSM 7239	49.9 ± 0.1a	5.40 ± 0.15	78.7 ± 0.5	0.408 ± 0.003	0.693 ± 0.002	0.408
Ethanol	Apple pomace		Lachancea thermotolerans	DSM 3434	51.5 ± 0.4a	3.78 ± 0.23	74.5 ± 0.9	0.444 ± 0.009	0.715 ± 0.005	0.444
Ethanol	Apple pomace		Saccharomyces cerevisiae	CECT 1383	46.5 ± 0.5a	3.51 ± 0.04	79.9 ± 1.4	0.374 ± 0.003	0.646 ± 0.007	0.374
Ethanol	Apple pomace		Saccharomyces cerevisiae	DSM 70449	25.7 ± 10.5b	2.10 ± 0.75	37.9 ± 13.5	0.463 ± 0.025	0.357 ± 0.146	0.463
Ethanol	Apple pomace		Saccharomyces cerevisiae	Ethanol Red®	51.0 ± 1.0a	4.05 ± 0.11	84.0 ± 0.3	0.398 ± 0.009	0.708 ± 0.014	0.398
Ethanol	Apple pomace		Saccharomyces cerevisiae	Hércules-green	44.5 ± 0.8a	3.60 ± 0.05	77.3 ± 3.6	0.371 ± 0.012	0.619 ± 0.012	0.371
Ethanol	Apple pomace		Scheffersomyces stipitis	DSM 3651	0.0 ± 0.0c	3.03 ± 0.16	0.0 ± 0.0	0.000 ± 0.000	0.000 ± 0.000	0.000
Ethanol	Apple pomace		Scheffersomyces stipitis	DSM 3652	0.2 ± 0.05c	3.13 ± 0.17	0.4 ± 1.2	0.391 ± 0.776	0.003 ± 0.001	0.391
Ethanol	Apple pomace		Zymomonas mobilis	DSM 3580	7.8 ± 4.7c	2.60 ± 1.47	37.3 ± 35.8	0.342 ± 0.370	0.108 ± 0.065	0.342
Ethanol	Apple pomace		avrg							0.401364
Ethanol	Apple pomace		total sugar (g g−1 apple pomace)							0.67391
Ethanol	Apple pomace		Yield (g ethanol/ g apple pomace)							0.270483
Ethanol	Apple pomace
Ethanol	Apple pomace	ref 3	https://www.sciencedirect.com/science/article/pii/S0360544221027183?via%3Dihub#tbl4
Ethanol	Apple pomace		Apple pomace biorefinery for ethanol, mycoprotein, and value-added biochemicals production by Mucor indicu
Ethanol	Apple pomace		Table 4. Ethanol production from untreated and pretreated apple pomace solids prepared at different pretreatment conditions.										Table 5. Ethanol yield (based kg untreated substrate) and microbial biomass yield from fermentation of pretreatment liquor.														Fig. 3. Overall mass balance for the production of ethanol, mycoprotein, and chitosan from apple pomace. The mass composition of starting substrate is based on values reported in Table 2, i.e., 1 kg of untreated apple pomace without free sugars.
Ethanol	Apple pomace		Pretreatment conditions				Ethanol concentration (g/L)	Ethanol Yield (%)	Ethanol yield (g/kg substratea)	Ethanol yield (g/kg substratea)	Ethanol yield (g/g substratea)		Pretreatment conditions				Ethanol yield (g/kg substratea)		Biomass yield (g/kg substratea)		Ethanol yield (g/kg substratea)
Ethanol	Apple pomace		T (°C)	Time(min)	Ethanol (%)	H2SO4 (%)							T (°C)	Time (min)	Ethanol (%)	H2SO4 (%)	Anaerobic	Aerobic	Aerobic	Anaerobic	Anaerobic	Aerobic
Ethanol	Apple pomace		Untreated				3.2 ± 0.1	38.1 ± 0.4	64.0 ± 2.4	64	0.064		100	30	50	–	171.7 ± 8.2	66.3 ± 4.2	96.2 ± 3.1	37.5 ± 1.9	171.7	66.3
Ethanol	Apple pomace		100	30	50	–	5.2 ± 0.2	41.1 ± 0.3	34.1 ± 1.5	34.1	0.0341		150	30	50	–	114.7 ± 9.2	73.4 ± 7.0	58.7 ± 4.5	32.5 ± 1.2	114.7	73.4
Ethanol	Apple pomace		150	30	50	–	5.5 ± 0.3	40.2 ± 0.3	21.0 ± 1.1	21	0.021		180	30	50	–	1.2 ± 0.1	0.8 ± 0.2	23.7 ± 1.2	16.2 ± 1.5	1.2	0.8
Ethanol	Apple pomace		180	30	50	–	6.2 ± 0.4	44.1 ± 0.6	17.4 ± 1.1	17.4	0.0174		100	60	50	–	89.0 ± 2.9	112.4 ± 6.0	67.5 ± 1.8	32.5 ± 2.0	89	112.4
Ethanol	Apple pomace		100	60	50	–	5.8 ± 0.4	45.1 ± 0.3	36.9 ± 2.8	36.9	0.0369		150	60	50	–	75.0 ± 4.0	68.8 ± 4.0	51.6 ± 3.5	25.0 ± 1.1	75	68.8
Ethanol	Apple pomace		150	60	50	–	6.7 ± 0.4	51.9 ± 1.2	21.6 ± 1.1	21.6	0.0216		180	60	50	–	2.2 ± 0.2	0.2 ± 0.1	22.5 ± 1.2	13.7 ± 1.0	2.2	0.2
Ethanol	Apple pomace		180	60	50	–	8.1 ± 0.5	59.0 ± 0.4	25.0 ± 1.5	25	0.025		100	30	85	–	180.4 ± 3.2	113.4 ± 3.5	56.2 ± 2.7	30.0 ± 2.5	180.4	113.4
Ethanol	Apple pomace		100	30	85	–	4.6 ± 0.3	59.3 ± 0.8	30.7 ± 2.1	30.7	0.0307		150	30	85	–	161.2 ± 6.0	119.6 ± 3.7	50.0 ± 1.5	32.5 ± 1.4	161.2	119.6
Ethanol	Apple pomace		150	30	85	–	6.7 ± 0.5	59.9 ± 0.5	29.5 ± 2.4	29.5	0.0295		180	30	85	–	4.1 ± 1.2	1.4 ± 0.2	3.7 ± 1.0	6.2 ± 1.2	4.1	1.4
Ethanol	Apple pomace		180	30	85	–	6.4 ± 0.5	44.8 ± 0.6	19.3 ± 1.4	19.3	0.0193		100	60	85	–	92.9 ± 3.6	62.2 ± 8.2	81.2 ± 3.6	32.5 ± 1.9	92.9	62.2
Ethanol	Apple pomace		100	60	85	–	5.2 ± 0.4	46.7 ± 0.4	31.3 ± 2.6	31.3	0.0313		150	60	85	–	106.5 ± 4.9	91.3 ± 6.2	36.2 ± 3.8	38.7 ± 2.9	106.5	91.3
Ethanol	Apple pomace		150	60	85	–	7.8 ± 0.6	60.7 ± 0.9	31.2 ± 2.6	31.2	0.0312		180	60	85	–	11.2 ± 1.2	2.6 ± 1.2	10.0 ± 1.2	7.5 ± 1.2	11.2	2.6
Ethanol	Apple pomace		180	60	85	–	7.4 ± 0.4	51.2 ± 0.7	22.4 ± 1.2	22.4	0.0224		100	30	50	0.5	197.7 ± 7.4	117.5 ± 4.9	72.5 ± 4.8	30.0 ± 2.0	197.7	117.5
Ethanol	Apple pomace		100	30	50	0.5	6.7 ± 0.5	51.9 ± 1.6	47.2 ± 3.9	47.2	0.0472		150	30	50	0.5	187.1 ± 3.9	145.6 ± 5.5	65.0 ± 3.0	36.2 ± 1.4	187.1	145.6
Ethanol	Apple pomace		150	30	50	0.5	9.0 ± 0.3	66.9 ± 0.5	31.6 ± 1.2	31.6	0.0316		180	30	50	0.5	5.0 ± 2.5	3.7 ± 2.5	7.5 ± 1.6	11.2 ± 1.0	5	3.7
Ethanol	Apple pomace		180	30	50	0.5	10.1 ± 0.4	73.1 ± 0.5	30.3 ± 1.2	30.3	0.0303		100	60	50	0.5	101.2 ± 5.2	62.8 ± 6.6	70.0 ± 3.2	33.7 ± 2.4	101.2	62.8
Ethanol	Apple pomace		100	60	50	0.5	9.5 ± 0.3	76.1 ± 1.8	64.5 ± 2.0	64.5	0.0645		150	60	50	0.5	82.1 ± 5.0	37.8 ± 3.2	48.7 ± 2.4	43.7 ± 1.7	82.1	37.8
Ethanol	Apple pomace		150	60	50	0.5	9.4 ± 0.5	74.5 ± 2.3	32.1 ± 1.5	32.1	0.0321		180	60	50	0.5	8.7 ± 1.2	3.2 ± 1.1	7.5 ± 1.4	10.0 ± 1.2	8.7	3.2
Ethanol	Apple pomace		180	60	50	0.5	9.3 ± 0.4	72.1 ± 1.1	29.1 ± 1.2	29.1	0.0291		100	30	85	0.5	147.7 ± 3.1	97.4 ± 1.9	75.0 ± 3.5	40.0 ± 2.5	147.7	97.4
Ethanol	Apple pomace		100	30	85	0.5	6.8 ± 0.2	66.7 ± 0.6	41.0 ± 1.5	41	0.041		150	30	85	0.5	139.9 ± 2.2	86.9 ± 3.2	56.2 ± 4.4	38.7 ± 2.2	139.9	86.9
Ethanol	Apple pomace		150	30	85	0.5	8.4 ± 0.5	67.5 ± 1.6	37.6 ± 2.1	37.6	0.0376		180	30	85	0.5	2.5 ± 0.7	1.6 ± 0.2	13.7 ± 1.7	5.0 ± 1.5	2.5	1.6
Ethanol	Apple pomace		180	30	85	0.5	9.4 ± 0.5	68.4 ± 0.9	32.1 ± 1.7	32.1	0.0321		100	60	85	0.5	96.4 ± 5.6	100.7 ± 5.2	77.5 ± 6.4	31.2 ± 1.6	96.4	100.7					stream 1	197.7	g ethanol/kg dry based apple pomac
Ethanol	Apple pomace		100	60	85	0.5	7.1 ± 0.3	61.0 ± 0.5	52.1 ± 2.0	52.1	0.0521		150	60	85	0.5	111.9 ± 3.6	109.2 ± 4.5	43.7 ± 3.4	32.5 ± 0.7	111.9	109.2					stream 2	117,4	g ethanol/kg dry based apple pomac
Ethanol	Apple pomace		150	60	85	0.5	8.9 ± 0.5	67.5 ± 0.5	37.9 ± 2.0	37.9	0.0379		180	60	85	0.5	5.9 ± 2.5	2.2 ± 0.1	18.7 ± 1.1	8.7 ± 0.1	5.9	2.2					stream 3	47.2	g ethanol/kg dry based apple pomac
Ethanol	Apple pomace		180	60	85	0.5	10.1 ± 0.6	68.7 ± 0.5	35.2 ± 2.1	35.2	0.0352		a								87.3417	61.7083					all	244.9	g ethanol/kg dry based apple pomace
Ethanol	Apple pomace		a										Untreated apple pomace.															0.9021	DM in apple pomace
Ethanol	Apple pomace		Untreated substrate.													from liquor	Yield (g ethanol/ g apple pomace)				avrg	0.074525						0.220924	Yield (g ethanol/ g apple pomace)
Ethanol	Apple pomace				from solid	Yield (g ethanol/ g apple pomace)				avrg	0.034204
Ethanol	Apple pomace					Yield (g ethanol/ g apple pomace)					0.108729	We disgard this result due to too many low values
Ethanol	Apple pomace
Ethanol	Apple pomace
Ethanol	Apple pomace
Ethanol	Apple pomace
Ethanol	Apple pomace	ref 4	https://www.sciencedirect.com/science/article/pii/S0960148123003518?via%3Dihub#tbl3
Ethanol	Apple pomace		A novel integrated biorefinery approach for apple pomace valorization with significant socioeconomic benefits
Ethanol	Apple pomace		Table 4. Total ethanol production and reduction in greenhouse gas emissions from the apple pomace in Iran.													Fig. 5. Overall mass balance and total gasoline equivalent for ethanol production.
Ethanol	Apple pomace		Pretreatment conditions				Fbiofuel (ML)	Fsaving (ML)	Fblend (ML)		Fequivalent(ML)		ΔGHG (kt CO2 eq)
Ethanol	Apple pomace		Temperature (°C)	Ethanol (% v/v)	Catalyst (% w/w)	Time (min)	Empty Cell	Empty Cell	E85	E10	E85	E10	E85	E10
Ethanol	Apple pomace		Untreated	–	–-	–	17.1	11.6	20.1	171.1	14.6	165.5	24.5	24.7
Ethanol	Apple pomace		100	50	–	30	59.3	40.3	69.8	593	50.8	574.1	84.9	85.6
Ethanol	Apple pomace		150	50	–	30	50	34	58.8	499.6	42.8	483.6	71.5	72.1
Ethanol	Apple pomace		180	50	–	30	14.5	9.8	17	144.8	12.4	140.1	20.7	20.9
Ethanol	Apple pomace		100	50	–	60	49.9	33.9	58.7	499.6	42.7	483.5	71.4	72													stream 1	125	g ethanol/kg apple pomac
Ethanol	Apple pomace		150	50	–	60	34.4	23.4	40.5	344.3	29.5	333.2	49.3	49.6													stream 2	48.3	g ethanol/kg apple pomac
Ethanol	Apple pomace		180	50	–	60	11.5	7.8	13.5	115.3	9.9	111.6	16.5	16.6													all	173.3	g ethanol/kg apple pomace
Ethanol	Apple pomace		100	85	–	30	42.9	29.2	50.5	429.1	36.7	415.4	61.4	61.9														0.1733	Yield (g ethanol/ g apple pomace)
Ethanol	Apple pomace		150	85	–	30	38.7	26.3	45.5	386.7	33.1	374.3	55.3	55.8
Ethanol	Apple pomace		180	85	–	30	17	11.6	20	170.4	14.6	164.9	24.4	24.6
Ethanol	Apple pomace		100	85	–	60	53.4	36.3	62.8	533.8	45.7	516.8	76.4	77.1
Ethanol	Apple pomace		150	85	–	60	26.6	18.1	31.2	265.5	22.7	257.1	38	38.3
Ethanol	Apple pomace		180	85	–	60	10.9	7.4	12.9	109.5	9.4	106	15.7	15.8
Ethanol	Apple pomace		100	50	0.5	30	45	30.6	53	450.3	38.6	435.9	64.5	64.9
Ethanol	Apple pomace		150	50	0.5	30	35.3	24	41.5	352.8	30.2	341.5	50.5	51
Ethanol	Apple pomace		180	50	0.5	30	18.1	12.3	21.3	181.4	15.5	175.6	26	26.1
Ethanol	Apple pomace		100	50	0.5	60	37.1	25.2	43.6	370.6	31.7	358.7	53.1	53.5
Ethanol	Apple pomace		150	50	0.5	60	33.1	22.5	38.9	330.9	28.3	320.3	47.7	47.7
Ethanol	Apple pomace		180	50	0.5	60	16.2	11	19	162.2	13.9	157	23.2	23.4
Ethanol	Apple pomace		100	85	0.5	30	40	27.2	47	400	34.3	387.2	57.3	57.7
Ethanol	Apple pomace		150	85	0.5	30	40.1	27.3	47.2	401.1	34.3	388.2	57.4	57.8
Ethanol	Apple pomace		180	85	0.5	30	17.6	12	20.7	176.2	15.1	170.6	25.2	25.4
Ethanol	Apple pomace		100	85	0.5	60	48.3	32.9	56.9	483.5	41.4	468.1	69.2	69.8
Ethanol	Apple pomace		150	85	0.5	60	26.1	17.7	30.7	260.8	22.3	252.4	37.3	37.6
Ethanol	Apple pomace		180	85	0.5	60	14.3	9.7	16.8	142.7	12.2	138.1	20.4	20.6
Ethanol	Apple pomace
Ethanol	Apple pomace
Ethanol	Apple pomace	ref 5
Ethanol	Apple pomace
Ethanol	Apple pomace		Table 3. Maximum yield factors and productivity results of the optimization step with respect to bioethanol production obtained during the course of the fermentation.
Ethanol	Apple pomace		Run No	EtOH yield	EtOH yield	Biomass yield	Volumetric EtOH
Ethanol	Apple pomace			On biomass	On substrate	On substrate	Productivity
Ethanol	Apple pomace			(YP/X)∗	(YP/S)∗	(YX/S)∗	(Qp)∗
Ethanol	Apple pomace		1	1.003	0.867	0.864	0.09
Ethanol	Apple pomace		2	0.434	0.389	0.896	0.085
Ethanol	Apple pomace		3	0.69	0.604	0.876	0.076
Ethanol	Apple pomace		4	0.758	0.541	0.714	0.124
Ethanol	Apple pomace		5	0.412	0.544	1.321	0.042
Ethanol	Apple pomace		6	1.673	0.945	0.565	0.121
Ethanol	Apple pomace		7	0.332	0.681	2.05	0.062
Ethanol	Apple pomace		8	0.675	0.714	1.058	0.078
Ethanol	Apple pomace		9	1.192	0.49	0.411	0.093
Ethanol	Apple pomace		10	1.117	0.732	0.655	0.052
Ethanol	Apple pomace		11	0.943	0.791	0.839	0.087
Ethanol	Apple pomace		12	0.665	0.518	0.779	0.106
Ethanol	Apple pomace		13	0.713	0.576	0.808	0.075
Ethanol	Apple pomace		14	0.797	0.551	0.691	0.081
Ethanol	Apple pomace		15	1.276	0.577	0.452	0.046
Ethanol	Apple pomace		16	0.589	0.456	0.773	0.064
Ethanol	Apple pomace		17	0.587	0.564	0.961	0.093
Ethanol	Apple pomace		18	0.612	0.712	1.164	0.077
Ethanol	Apple pomace		19	1.006	0.687	0.683	0.105
Ethanol	Apple pomace		20	0.801	0.585	0.73	1.152
Ethanol	Apple pomace		* YP/X (gEtOH/gbiomass); YP/S (gEtOH/gsubstrate); YX/S (gbiomass/gsubstrate); Qp (gEtOH/L/h).
Ethanol	Apple pomace		avrg	0.81375	0.6262	0.8645
Ethanol	Apple pomace		total sugar (g g−1 apple pomace)		0.67391
Ethanol	Apple pomace		Yield (g ethanol/ g apple pomace)		0.422002
Ethanol
Ethanol
furfural	Apple	theoretical	https://ift.co.za/media/mediafiles/archive/SAIChE%20Congress%202003%20Arnold%20and%20Buzzard%20paper.pdf
			A NOVEL PROCESS FOR FURFURAL PRODUCTION
			𝒀_(𝒇𝒖𝒓𝒇𝒖𝒓𝒂𝒍/𝒙𝒚𝒍𝒐𝒔𝒆 )	0.7272
			xylose content	0.0003
			Y furfural / biomass	0.00021816
	Apple pomace	theoretical	https://ift.co.za/media/mediafiles/archive/SAIChE%20Congress%202003%20Arnold%20and%20Buzzard%20paper.pdf
			A NOVEL PROCESS FOR FURFURAL PRODUCTION
			𝒀_(𝒇𝒖𝒓𝒇𝒖𝒓𝒂𝒍/𝒙𝒚𝒍𝒐𝒔𝒆 )	0.7272
			xylose content	0.10251
			Y furfural / biomass	0.0745453
HMF	Apple	theoretical	HMF formation reactions (i.e., glucan hydrolysis, glucose isomerization, and fructose dehydration)
			C6H12O6 (Fructose) → C5H4O2CHO (Furfural) + 2H2O.
			180	126
			theoretical yield g/g fructose+glucose	0.7
			fructose+glucose in apple%	13.9439
			theoretical yield g/ g apple	0.0976072
	Apple pomace	ref 1	https://link.springer.com/article/10.1007/s11696-023-03055-0
			Production of 5-hydroxymethylfurfural from apple pomace in deep eutectic solvent
			The highest total HMF yield (44.5%) was achieved at 110 °C in 10 min with 15 wt% H2O, and 0.01 g CrCl3 as co-catalyst. Without the co-catalyst, the highest achieved HMF yield was 37.3% (120 °C, 20 min, 15 m% H2O).
			The HMF yields are expressed as the ratio of HMF determined from the MIBK or DES phase to the initial holocellulose (hemicellulose + cellulose) content of the apple pomace fed to the reaction.
			HMF yield	0.445
			HMF yield	0.373
			avrg HMF yield	0.409
			holocellulose in apple pomace %	10.25
			HMF yield g/g apple pomace	0.0419225
FDCA	Apple	theoretical	https://www.researchgate.net/figure/Theoretical-and-Overall-Yield-for-the-Conversion-of-Pure-Sugars-to-Ethylene-via-Ethanol_tbl6_259752935
			Chemocatalytic Processes for the Production of Bio-Based Chemicals from Carbohydrates
			theoretical yield FDCA from sugar g/g	0.867
			fru+glu in apple %	13.9439
			theoretical yield FDCA from apple g/g	0.120893
	Apple pomace	theoretical	https://www.researchgate.net/figure/Theoretical-and-Overall-Yield-for-the-Conversion-of-Pure-Sugars-to-Ethylene-via-Ethanol_tbl6_259752935
			Chemocatalytic Processes for the Production of Bio-Based Chemicals from Carbohydrates
			theoretical yield FDCA from sugar g/g	0.867
			fru+glu in apple %	57.14
			theoretical yield FDCA from apple g/g	0.495404
Isoprene	Apple	theoretical	glucose in apple	4.45915
			yield (isoprene/apple)	0.00758055
	Apple pomace	theoretical	glucose in apple pomace	37.56
			yield (isoprene/apple pomace)	0.063852
succinic acid	Apple	theoretical	yield g/g sugar	0.667143
			glu+fru+xyl in apple	13.9693
			succinate yield g/g apple	0.0931952
	Apple pomace	theoretical	yield g/g sugar	0.667143
			glu+fru+xyl in apple	67.391
			succinate yield g/g apple	0.449594
3-HP	Apple	theoretical	yield g/g sugar	0.2365
			glucose in apple	4.45915
			yield (3-HP/apple)	0.0105459
	Apple pomace	theoretical	yield g/g sugar	0.2365
			glucose in apple pomace	37.56
			yield (3-HP/apple pomace)	0.0888294
levulinic acid	Apple	theoretical	Theoretical yield (g/g hexos)	0.521033
			glu+fru Apple (g/100g)	13.9439
			Theoretical yield (g/g Apple)	0.0726523
	Apple pomace	theoretical	Theoretical yield (g/g hexos)	0.521033
			glu+fru Apple pomace (g/100g)	57.14
			Theoretical yield (g/g Apple pomace)	0.297718
	Apple	theoretical	https://link.springer.com/article/10.1007/s10570-019-02571-1
			Bioprocessing of rice husk into monosaccharides and the fermentative production of bioethanol and lactate
			YLA lactic acid yield expressed as percentage of theoretical lactic acid yield (0.76 g lactic acid per g sugar)
			theoretical yield (g lactic acid per g sugar)	0.76
			sugar from rice g/g	82.6667
			theoretical yield (g lactic acid per g rice)	0.628267
lactic acid	Apple	ref 1	https://www.sciencedirect.com/science/article/pii/S0023643806000326?via%3Dihub#tbl4
			Apple pieces as immobilization support of various microorganisms
			Table 4. Fermentation parameters during lactic acid fermentation of whey using immobilized L. casei on apple pieces at various temperatures
			Fermentation temperature (°C)	Repeated batch fermentations	Fermentation timea (h)	Lactic acid concentrationa (g/l)	Ethanol concentrationa (vol%)	Residual sugara,b (g/l)	Daily lactic acid productivitya (g/l)	Lactic acid production yielda (g/100 g)	Conversiona (%)
			30	1–5	107	17.1	1.1	2.5	3.9	34.1	95.2
			37	6–10	87	24.5	0.7	2.6	6.8	49	94.6
			45	11–15	63	31.3	0.7	3.1	12	62.7	93.8
			a
			Average values.
			b
			Lactose, glucose and galactose.
			average yield g/100g	48.6
			average yield g/g	0.486
			sugar in apple %	13.9693
			yield g/g apple	0.0678908
		ref 2	https://www.sciencedirect.com/science/article/pii/S0032959204000500
			Lactobacillus casei cell immobilization on fruit pieces for probiotic additive, fermented milk and lactic acid production
			Support	Fermentation temperature (°C)	Successive fermentation batches	Fermentation time (h)	Lactic acid (g/l)	Ethanol (%, v/v)	Lactose (g/l)	Lactic acid production yield (g/100 g)	Daily lactic acid productivity (g/l)	Conversion (%)
			Apple	30	1	118	15.1	1.6	Tr	30.2	3.1	100
					2	122	19.3	1.1	Tr	38.6	3.8	100
					3	107	18.2	0.8	2.9	36.4	4.1	94
					4	88	15.3	1.2	6.7	30.6	4.2	87
					5	101	17.4	0.9	2.7	34.8	4.1	95
				37	6	89	25.4	0.7	2.5	50.8	6.8	95
					7	102	24.7	0.9	0.3	49.4	5.8	99
					8	69	21.4	0.8	7.8	42.8	7.4	84
					9	91	25.5	0.7	1.1	51	6.7	98
					10	86	25.4	0.6	1.5	50.8	7.1	97
				45	11	72	32.9	0.6	2.6	65.8	11	95
					12	63	32	0.7	9	64	12.1	82
					13	56	30.3	0.7	0.7	60.6	13	99
					14	65	31.7	0.7	2.8	63.4	11.7	94
					15	59	29.8	0.8	0.6	59.6	12.1	99
			Lactic acid production yield was expressed as grams of lactic acid produced/100 g of sugar
			avrg (g/100 g)	48.5867						48.5867
			sugar in apple %	13.9693
			yield g/g apple	0.0678722
		ref 3	https://www.sciencedirect.com/science/article/pii/S096085242031511X?via%3Dihub#t0015
			Enhanced lactic acid production from the anaerobic co-digestion of swine manure with apple or potato waste via ratio adjustment
			Table 3. Effect of substrate ratio on lactic acid production.
			Treatments	Carbohydrate	Reducing sugar	Starch	Lactic acid				Table 2. Experimental design parameters of this experiment under anaerobic conditions.
			Empty Cell	(g/g VS)	(g/g VS)	(g/g VS)	(g/L)	(g COD/L)	g/g VSfeedstock		Test		Reactor no.	SM (g)	AW/PW (g)	Inoculum (g)	C/N
			A1	0.65 ± 0.04	0.49 ± 0.01	0.10 ± 0.02	25.80 ± 1.12	27.61 ± 1.20	0.65 ± 0.03		Group 1	SM/AW = 25:75	A1	32.7	224.1	54	34.3
			A2	0.71 ± 0.06	0.58 ± 0.01	0.10 ± 0.02	20.95 ± 1.76	22.42 ± 1.88	0.52 ± 0.04		Group 2	SM/AW = 10:90	A2	13.1	268.9	54	57.3
			A3	0.75 ± 0.07	0.65 ± 0.01	0.11 ± 0.02	16.09 ± 2.38	17.22 ± 2.54	0.40 ± 0.06		Group 3	SM/PW = 25:75	P1	32.7	173.5	54	24.4
			P1	0.84 ± 0.07	0.02 ± 0.00	0.72 ± 0.12	8.33 ± 0.59	8.92 ± 0.63	0.21 ± 0.01		Group 4	SM/PW = 10:90	P2	13.1	208.3	54	33.6
			P2	0.94 ± 0.08	0.02 ± 0.00	0.85 ± 0.14	4.50 ± 0.64	4.81 ± 0.69	0.11 ± 0.02		Group 5	AW	A3	0	298.8	54	100.2
			P3	1.01 ± 0.09	0.03 ± 0.00	0.93 ± 0.16	7.25 ± 0.27	7.76 ± 0.29	0.18 ± 0.01		Group 6	PW	P3	0	231.4	54	44.7
			S1	0.33 ± 0.02	0.00 ± 0.00	0.07 ± 0.03	7.31 ± 0.48	7.82 ± 0.52	0.18 ± 0.01		Group 7	SM	S1	130.8	0	54	10
											Group 8	Blank	S2	130.8	0	0	10
			yield (g/g Vsfeedstock)	0.4
			Vsfeedstock in apple %	12.05
			yield (g/g feedstock)	0.0482							able 1. Characteristics of the substrates.
											Parameterf	Units	SM	AW	PW
											TSa	(% of FMc)	34.81 ± 0.30d	13.45 ± 0.04	16.35 ± 0.22
											VSb	(% of FM)	27.52 ± 0.69	12.05 ± 0.57	15.56 ± 0.24
											a
											TS – Total solids.
											b
											VS – Volatile solids.
											c
											FM – Fresh matter.
	apple pomace	ref 1	https://analyticalsciencejournals.onlinelibrary.wiley.com/doi/10.1002/jctb.1838
			Experimental evaluation of alternative fermentation media for L-lactic acid production from apple pomace
			In media containing 0.2 g CSL g−1 potential sugars, 29.5 g lactic acid L−1 was obtained after 24 h, at good yield (35.5 g per 100 g dry apple pomace) and productivity (1.23 g L−1 h−1), with a lactic acid/acetic acid mass ratio of 98 g g−1.
			yield g/100 g Dry AP	35.5	35.5 g per 100 g dry apple pomace
			water in AP %	9.97
			yield g/100 g AP	0.319606
		ref 2	https://www.sciencedirect.com/science/article/pii/S0960852407000119?via%3Dihub
			l-Lactic acid production from apple pomace by sequential hydrolysis and fermentation
			Mass balances showed that 46.5 kg of lactic acid can be produced from 100 kg of dry apple pomace by sequential hydrolysis and fermentation.
			yield g/100 g Dry AP	46.5
			water in AP %	9.97
			yield g/100 g AP	0.418639
		ref 3	https://pubs.acs.org/doi/10.1021/jf070442v
			Production of L-lactic acid and oligomeric compounds from apple pomace by simultaneous saccharification and fermentation: A response surface methodology assessment
			Material balances showed that the SSF processing of 100 kg of dry apple pomace results in the production of 36.6 kg of lactic acid, 18.3 kg of oligomeric carbohydrates (which can be used as ingredients for functional foods), 8.4 kg of microbial biomass, and 8 kg uronic acids.
			yield g/100 g Dry AP	36.6
			water in AP %	9.97
			yield g/100 g AP	0.32951
sorbitol	apple	theoretical	https://link.springer.com/article/10.1007/s00253-002-1046-0
			The biotechnological production of sorbitol
			avrg conversion of glucose and fructose %	95.2
			yield g/g glucose and fructose	0.962578
			glu+ fru in apple %	13.9439
			yield g/g apple	0.134221
	apple pomace	theoretical	https://link.springer.com/article/10.1007/s00253-002-1046-0
			The biotechnological production of sorbitol
			avrg conversion of glucose and fructose %	95.2
			yield g/g glucose and fructose	0.962578
			glu+ fru in apple pomace %	57.14
			yield g/g apple pomace	0.550017
xylitol	apple	theoretical	https://www.sciencedirect.com/science/article/pii/S0922338X98800263?casa_token=aLqBeV90biIAAAAA:uqYoRDUYXPdbjyYra-122gWl9FVoabLSx-h_EHf6fDpWVOsKLf0qIS6Sd5kzioR63hHTDi8
			Microbial conversion of d-xylose to xylitol
			avrg Yx/s (g xylitol/g xylose)	0.485909
			xylose in apple %	0.025425
			yield (g xylitol / g apple)	0.000123542
xylitol	apple pomace	theoretical	https://www.sciencedirect.com/science/article/pii/S0922338X98800263?casa_token=aLqBeV90biIAAAAA:uqYoRDUYXPdbjyYra-122gWl9FVoabLSx-h_EHf6fDpWVOsKLf0qIS6Sd5kzioR63hHTDi8
			Microbial conversion of d-xylose to xylitol
			avrg Yx/s (g xylitol/g xylose)	0.485909
			xylose in apple pomace %	10.251
			yield (g xylitol / g apple pomace)	0.0498105

## Sheet: orange
Ethanol	orange	ref 1	https://pubs-rsc-org.ezproxy.library.wur.nl/en/content/articlelanding/2013/ra/c3ra43722a
Ethanol			Orange waste as a biomass for 2G-ethanol production using low cost enzymes and co-culture fermentation
Ethanol			Table 4 Comparative analysis of different mono- and co-culture fermentations of orange waste hydrolyzed with Xac enzymes with ethanol yields expressed in g in 100 mL of hydrolysates and in wt% (orange waste in natura)a
Ethanol			Strain	Ethanol/g	Ethanol yield/% (in wt% orange waste in natura)	Conversion factor/%	Ethanol productivity/g L−1 h−1	Time/h
Ethanol			1	0.80 ± 0.03	4.7 ± 0.2	86.0 ± 0.2	0.33 ± 0.01	24	4.7
Ethanol			2	0.81 ± 0.02	4.8 ± 0.1	87.1 ± 0.2	0.68 ± 0.02	12	4.8
Ethanol			3	0.74 ± 0.02	4.3 ± 0.2	69.8 ± 0.2	0.31 ± 0.01	24	4.3
Ethanol			1 and 2	0.83 ± 0.01	4.9 ± 0.2	89.2 ± 0.2	1.38 ± 0.02	6	4.9
Ethanol			1 and 3	0.92 ± 0.02	5.4 ± 0.1	98.9 ± 0.2	1.53 ± 0.01	6	5.4
Ethanol			2 and 3	0.62 ± 0.03	3.7 ± 0.2	66.7 ± 0.2	0.52 ± 0.02	12	3.7
Ethanol			a 1 – Saccharomyces cerevisiae, 2 – Candida parapsilosis IFM 48375, 3 – Candida parapsilosis NRRL-12969.
Ethanol			avrg						4.63333
Ethanol			Yield (g ethanol/g orange)						0.0463333
Ethanol
Ethanol
Ethanol		ref 2	https://www.sciencedirect.com/science/article/pii/0922338X89902572?via%3Dihub
Ethanol			Bioconversion of fruit and sugar beet extracts by Zymomonas mobilis to ethanol and other fine chemicals
Ethanol			TABLE 2. Kinetic parameters of ethanol production and yield by Z. mobilis
Ethanol
Ethanol
Ethanol
Ethanol
Ethanol
Ethanol
Ethanol
Ethanol
Ethanol
Ethanol
Ethanol
Ethanol
Ethanol
Ethanol
Ethanol						orange
Ethanol						YRS
Ethanol						1.03
Ethanol						0.58
Ethanol						1.4
Ethanol						0.73
Ethanol						0.6
Ethanol						0.64
Ethanol					avrg (g ethanol/g sugar)	0.83
Ethanol					sugar content (g sugar/g orange)	0.116405
Ethanol					yield ( g ethanol/ g orange)	0.0966164
Ethanol
Ethanol
Ethanol		ref 3	https://www.scielo.br/j/jbchs/a/XkTfhPwZwKNyNpLxsXvRM6s/?lang=en&format=pdf
Ethanol			Nanocellulose and Bioethanol Production from Orange Waste using Isolated Microorganisms
Ethanol			Table 1. Fermentation of CPWO acid hydrolyzates with yeasts
Ethanol
Ethanol
Ethanol
Ethanol
Ethanol
Ethanol
Ethanol
Ethanol
Ethanol
Ethanol
Ethanol
Ethanol				Ethanol produced (g from 4.2 g of dry CPWO)		0.45	0.31	0.35	0.35	0.37	0.35
Ethanol				avrg		0.363333
Ethanol				Ethanol produced (g / g of dry CPWO)		0.0865079
Ethanol				orange water content		0.7767
Ethanol				Ethanol produced (g / g of orange)		0.0193172
Ethanol
Ethanol			Table 2. Fermentation of CPWO enzymatic hydrolyzates with yeasts
Ethanol
Ethanol
Ethanol
Ethanol
Ethanol
Ethanol
Ethanol
Ethanol
Ethanol
Ethanol				Ethanol produced (g from 4.2 g of dry CPWO)		0.75	0.85	0.76
Ethanol				avrg		0.786667
Ethanol				Ethanol produced (g / g of dry CPWO)		0.187302
Ethanol				orange water content		0.7767
Ethanol				Ethanol produced (g / g of orange)		0.0418244
Ethanol
Ethanol			avrg table 1 and 2		0.0305708
Ethanol
Ethanol
Ethanol		ref 4	https://link.springer.com/article/10.1385/ABAB:113:1-3:095
Ethanol			Economic analysis of ethanol production in California using traditional and innovative feedstock supplies
Ethanol			Table 1 Feedstock Requirements and Availability for a 40 Million–Gal Ethanol Facility
Ethanol
Ethanol
Ethanol
Ethanol
Ethanol
Ethanol
Ethanol
Ethanol
Ethanol							Ethanol (gal/t)
Ethanol			Culled oranges		ethanol production (gal/t of culled oranges)		13
Ethanol					ethanol production (L/t of culled oranges)		49.2103
Ethanol					ethanol production (g/g of culled oranges)		0.038827
Ethanol
Ethanol
Ethanol		ref 5	https://elibrary.asabe.org/abstract.asp?aid=29174
Ethanol			Simultaneous Saccharification and Fermentation of Orange Processing Waste to Ethanol Using Kluyveromyces marxianus
Ethanol			%TY = 100 × CEtOH/[0.511 × (CFructose + CGlucose) + 0.538(CSucrose)
Ethanol			TY: theoretical yield
Ethanol
Ethanol
Ethanol
Ethanol
Ethanol												% TY
Ethanol
Ethanol												73.5
Ethanol												76.2
Ethanol												78.2
Ethanol												85.1
Ethanol												85.9
Ethanol
Ethanol
Ethanol						Glucose	Fructose [%]	Sucrose [%]
Ethanol					orange	2.02	2.36	4.19
Ethanol					avrg TY	79.78
Ethanol					EtOH g/100g orange	3.73446
Ethanol					Yield EtOH g/g orange	0.0373446
Ethanol
Ethanol
Ethanol	orange peel	ref 1		https://link.springer.com/article/10.1007/s11274-007-9346-2#Sec2
Ethanol	orange peel			Ethanol production by Saccharomyces cerevisiae and Kluyveromyces marxianus in the presence of orange-peel oil
Ethanol	orange peel			% TY = 100*(Et - E0)/[0.511*(Fr + Gl + Ga)+ 0.538*(Su)]
Ethanol	orange peel			where E t is the concentration of ethanol at time t, E0 is the initial concentration of ethanol, Fr is the initial concentration of fructose, Gl is the initial concentration of glucose, Ga is the initial concentration of galactose, and Su is the initial concentration of sucrose (concentrations expressed as g/l).
Ethanol	orange peel			The maximum ethanol yield produced was 37.1 g/l, (80% theoretical yield) at 72 h in the control fermentation.
Ethanol	orange peel			control fermentation: no extra orange oil has been added
Ethanol	orange peel					Glucose [%]	Fructose [%]	Sucrose [%]	Cellullose [%]	Xylose [%]	Hemicellulose [%]	tot. Glucose [%]	tot. Fructose [%]	tot. Xylose [%]
Ethanol	orange peel				orange peel	3.84	3.84	2.64	3.4008	0	1.368	10.5281	5.22947	0
Ethanol	orange peel				TY	0.8
Ethanol	orange peel				EtOH g/100g orange	6.44171
Ethanol	orange peel				Yield EtOH g/g orange	0.0644171
Ethanol	orange peel
Ethanol	orange peel
Ethanol	orange peel
Ethanol	orange peel	ref 2		https://pubs.acs.org/doi/10.1021/jf903163t
Ethanol	orange peel			Ethanol Production from Orange Peels: Two-Stage Hydrolysis and Fermentation Studies Using Optimized Parameters through Experimental Design
Ethanol	orange peel			Table 9. Ethanol Productivity Parameters for Fermentation of the Filtrate Obtained through Primary and Secondary Hydrolysis Using RSM-Optimized Parametersa
Ethanol	orange peel
Ethanol	orange peel
Ethanol	orange peel
Ethanol	orange peel
Ethanol	orange peel
Ethanol	orange peel
Ethanol	orange peel
Ethanol	orange peel
Ethanol	orange peel
Ethanol	orange peel
Ethanol	orange peel			a: Means that have the same letter are not significantly different. Although the fermentation of the filtrate obtained during primary and secondary hydrolysis was separately carried out, the results presented in the table represent productivity of the overall process.
Ethanol	orange peel
Ethanol	orange peel			ethanol yield (g/g sugar)		0.4	0.42	0.46	0.46	0.46
Ethanol	orange peel			avrg		0.44
Ethanol	orange peel			sugar content [g sugar/ g orange peel]		0.157576
Ethanol	orange peel			yield [g ethanol / g orange peel]		0.0693335
Ethanol	orange peel
Ethanol	orange peel	ref 3		https://academic.oup.com/lambio/article-abstract/62/1/75/6699684?redirectedFrom=fulltext
Ethanol	orange peel			High temperature alcoholic fermentation of orange peel by the newly isolated thermotolerant Pichia kudriavzevii KVMP10
Ethanol	orange peel			Table 2 Production of ethanol from citrus waste in microbial fermentations
Ethanol	orange peel					Wilkins et al. (2007a)	Wilkins et al. (2007a)	Wilkins et al. (2007b)	Wilkins (2009)	Sharma et al. (2007	Oberoi et al. (2010)	Oberoi et al. (2011)	Pourbafrani et al. (2010)	Sandhu et al. (2012)	Lennartsson et al. (2012)
Ethanol	orange peel			product yield [g ethanol / g sugars]		0.44	0.45	0.43	0.48	0.42	0.46	0.48	0.43	0.67	0.37	0.39	0.43	0.41	0.39
Ethanol	orange peel			avrg yield		0.446429
Ethanol	orange peel			sugar content [g sugar/ g orange peel]		0.157576
Ethanol	orange peel			yield [g ethanol / g orange peel]		0.0703465
Ethanol
Ethanol
Ethanol
furfual	orange	theoretical	https://ift.co.za/media/mediafiles/archive/SAIChE%20Congress%202003%20Arnold%20and%20Buzzard%20paper.pdf
			A NOVEL PROCESS FOR FURFURAL PRODUCTION
			𝒀_(𝒇𝒖𝒓𝒇𝒖𝒓𝒂𝒍/𝒙𝒚𝒍𝒐𝒔𝒆 )	0.7272
			xylose content	0.0285
			Y furfural / biomass	0.0207252
	orange peel	theoretical	https://ift.co.za/media/mediafiles/archive/SAIChE%20Congress%202003%20Arnold%20and%20Buzzard%20paper.pdf
			A NOVEL PROCESS FOR FURFURAL PRODUCTION
			𝒀_(𝒇𝒖𝒓𝒇𝒖𝒓𝒂𝒍/𝒙𝒚𝒍𝒐𝒔𝒆 )	0.7272
			xylose content	0
			Y furfural / biomass	0
HMF	orange	theoretical	HMF formation reactions (i.e., glucan hydrolysis, glucose isomerization, and fructose dehydration)
			C6H12O6 (Fructose) → C5H4O2CHO (Furfural) + 2H2O.
			180	126
			theoretical yield g/g fructose+glucose	0.7
			fructose+glucose in orange %	8.79053
			theoretical yield g/ g orange	0.0615337
	orange peel	theoretical	HMF formation reactions (i.e., glucan hydrolysis, glucose isomerization, and fructose dehydration)
			C6H12O6 (Fructose) → C5H4O2CHO (Furfural) + 2H2O.
			180	126
			theoretical yield g/g fructose+glucose	0.7
			fructose+glucose in orange peel %	15.7576
			theoretical yield g/ g orange	0.110303
FDCA	orange	theoretical	https://www.researchgate.net/figure/Theoretical-and-Overall-Yield-for-the-Conversion-of-Pure-Sugars-to-Ethylene-via-Ethanol_tbl6_259752935
			Chemocatalytic Processes for the Production of Bio-Based Chemicals from Carbohydrates
			theoretical yield FDCA from sugar g/g	0.867
			fru+glu in orange %	8.79053
			theoretical yield FDCA from orange g/g	0.0762139
	orange peel	theoretical	https://www.researchgate.net/figure/Theoretical-and-Overall-Yield-for-the-Conversion-of-Pure-Sugars-to-Ethylene-via-Ethanol_tbl6_259752935
			Chemocatalytic Processes for the Production of Bio-Based Chemicals from Carbohydrates
			theoretical yield FDCA from sugar g/g	0.867
			fru+glu in orange peel %	15.7576
			theoretical yield FDCA from orange peel g/g	0.136619
Isoprene	orange	theoretical	glucose in orange	4.22526
			yield (isoprene/orange)	0.00718295
	orange peel	theoretical	glucose in orange peel	10.5281
			yield (isoprene/orange peel)	0.0178978
succinic acid	orange	theoretical	yield g/g sugar	0.667143
			glu+fru+xyl in orange	11.6405
			succinate yield g/g orange	0.0776589
	orange peel	ref 1	https://link.springer.com/article/10.1007/s00253-010-2726-9
			Succinic acid production from orange peel and wheat straw by batch fermentations of Fibrobacter succinogenes S85
			Yield on orange peel g/g	0.122
		ref 2	https://arccjournals.com/journal/indian-journal-of-agricultural-research/AF-764
			Study the Effect of Different Renewable Carbon Sources on the Succinic Acid Biosynthesis by Optimization Culture Composition using 4-Liter Scale Bioreactor
			for orange peel
			concentration g/L	10	0
			SA production g/L	4.48	0
			total sugar g/L	0.3	5
			Δ SA / Δ sugar g/g	0.953191
			sugar in orange peel	15.7576
			yield g/ g orange peel	0.1502
		ref 3	https://www.sciencedirect.com/science/article/pii/S0956053X20303305#t0010
			A biorefinery for conversion of citrus peel waste into essential oils, pectin, fertilizer and succinic acid via different fermentation strategies
			Table 2. Succinic acid concentration and yield achieved in batch and fed-batch fermentations by A. succinogenes.
			Carbon source	Batch			Fed-Batch			Reference
				Succinic acid (g L−1)	Yield (gsa gtsc−1)	Productivity (g L−1h−1)	Succinic acid (g L−1)	Yield (gsa gtsc−1)	Productivity (g L−1h−1)
			Glucose	19	0.76	1.4	60.2	0.75	1.3	Liu et al., 2008b
			Glycerol	24.4	0.95	2.13	49.6	0.64	0.96	Carvalho et al. (2014)
			Sucrose	57.1	0.72	nd*	60.5	0.83	2.16	Jiang et al. (2014)
			Corn straw	45.5	0.8	0.95	53.2	0.82	1.21	Zheng et al. (2009)
			Cane molasses	46.4	0.79	0.97	55.2	0.8	1.15	Liu et al., 2008a
			CPW citrus peel waste	18.5	0.62	0.69	22.4	0.73	0.45	Current study
			*nd: no data
			tsc: total sugars consumed
			avrg yield g sa/g tsc	0.675
			sugar in orange peel %	15.7576
			yield g sa / g orange peel	0.106364
		ref 4	https://www.sciencedirect.com/science/article/pii/S0959652617317560
			Development of a citrus peel-based biorefinery strategy for the production of succinic acid
			Table 5. Succinic acid production in fermentations utilizing different raw materials.
			Raw material	Nitrogen source	Fermentation	Succinic acid (g L−1)	Yield (gsa gtsc−1)	Reference
			Glycerol	YE (10 g L−1)	Fed-batch, bioreactor	49.6	0.64	Carvalho et al., 2014
			Wheat hydrolyzate	YE (5 g L−1)/Vit	Batch, bioreactor	62.1	1.02	Dorado et al., 2009
			Bread hydrolyzate	BH (200 mg L−1 FAN)	Batch, bioreactor	47.3	n.d.	Leung et al., 2012
			Cotton stalk hydrolyzate	YE (30 g L−1)/Urea (2 g L−1)	Batch SSFa, shake flasks	63	0.64	Li et al., 2013
			Macroalgal hydrolyzate	YE (16.7 g L−1)	Batch, bioreactor	33.8	0.63	Morales et al., 2015
			Rapeseed meal	YE (15 g L−1)	Fed-batch SSFa, bioreactor	23.4	0.115	Chen et al., 2011
			Whey	YE (5 g L−1)/Pep (10 g L−1)	Batch, bioreactor	22.2	0.57	Wan et al., 2008
			CPW hydrolyzate	YE (5 g L−1)	Batch, shake flasks	8.3	0.7	Current study
			YE: yeast extract, Vit: vitamins, BH: bread hydrolyzate, Pep: peptone.
			a	Simultaneous saccharification and fermentation.
			yield g sa/g tsc	0.7
			sugar in orange peel %	15.7576
			yield g sa / g orange peel	0.110303
3-HP	orange	theoretical	yield g/g sugar	0.2365
			glucose in orange	4.22526
			yield (3-HP/orange)	0.00999275
	orange peel	theoretical	yield g/g sugar	0.2365
			glucose in orange peel	10.5281
			yield (3-HP/orange peel)	0.0248991
levulinic acid	orange	theoretical	Theoretical yield (g/g hexos)	0.521033
			glu+fru orange (g/100g)	8.79053
			Theoretical yield (g/g orange)	0.0458016
	orange peel	theoretical	Theoretical yield (g/g hexos)	0.521033
			glu+fru orange peel (g/100g)	15.7576
			Theoretical yield (g/g orange peel)	0.0821024
	orange peel	ref 1	https://onlinelibrary.wiley.com/doi/full/10.1002/bbb.2498
			Statistical approach for the optimization of levulinic acid production from orange peel as agricultural waste
				Product concentration/yield
			1 ton fresh OPW- 46.93 kg LA
			Yield g LA/g OPW	0.04694
		ref 2	https://analyticalsciencejournals.onlinelibrary.wiley.com/doi/epdf/10.1002/jctb.6484
			Microwave-assisted synthesis of levulinic acid from low-cost, sustainable feedstocks using organic acids as green catalysts
			LA yield (wt%)	86.7	Levulinic acid yield based on cellulose content in biomass
			cellulose in orange peel	3.4008
			LA yield	0.0294849
lactic acid	orange	theoretical	https://link.springer.com/article/10.1007/s10570-019-02571-1
			Bioprocessing of rice husk into monosaccharides and the fermentative production of bioethanol and lactate
			YLA lactic acid yield expressed as percentage of theoretical lactic acid yield (0.76 g lactic acid per g sugar)
			theoretical yield (g lactic acid per g sugar)	0.76
			sugar from orange g/g	11.6405
			theoretical yield (g lactic acid per g orange)	0.088468
	orange peel	ref 1	https://www.sciencedirect.com/science/article/pii/S1369703X1930052X?via%3Dihub#tbl0005
			On the use of resting L. delbrueckii spp. delbrueckii cells for D-lactic acid production from orange peel wastes hydrolysates
			Table 2. Results (% DLA, yield, selectivity, productivity and uptake percentage and rates of glucose and the mixture of fructose and galactose) obtained for the production stage runs performed using resting cells at different biomass concentrations and stirring speeds at a bioreactor. Temperature for all the runs was 40 °C and pH was controlled at 5.8 using a concentrated NaOH solution. The growt…
			RUN	N (rpm)	CX	Yielda (%)	Sb	Pc	Fru + Gal uptake (%)	Glu uptake rate (g/L·h)d	Fru + Gal uptake rate (g/L·h)d	% DLA
					(g/L)		(g/g)	(g/L·h)
			1	200	3	59.4	0.96	1.05	28.3	1.38	0.55	98
			2	200	5	61.7	0.91	1.19	41.4	1.95	0.62	97
			3	200	8	77.7	0.93	1.66	77.3	2.72	0.91	98
			4	200	10	80.8	0.94	1.73	85.8	4.7	1.02	97
			5	400	10	84	0.95	2	91.2	7	1.25	98
			6	600	10	87.3	0.95	2.31	96.1	7.04	1.31	97
			7	800	10	86.7	0.94	2.32	99.3	7.29	1.5	97
			avrg yield %	76.8
			sugar in orange peel %	15.7576
			yield g LA/g orange	0.121018
		ref 2	https://onlinelibrary.wiley.com/doi/epdf/10.1002/jsfa.9958
			Orange peels: from by-product to resource through lactic acid fermentation
			The productivity and the yield are calculated and expressed as the concentration of LA per fermentation time (g kg−1·h) and the amount of LA produced (g) from 1 mg of reducing sugar consumed (g g−1), respectively
			Among the single cultures tested, Lactobacillus casei 2246 was the most efficient strain, reaching the highest concentration of lactic acid (209.65 g kg−1) and yield (0.88 g g−1).
			avrg yield %	88
			sugar in orange peel %	15.7576
			yield g LA/g orange	0.138667
		ref 3	https://onlinelibrary.wiley.com/doi/10.1002/jsfa.12537
			Valorization of orange peels exploiting fungal solid-state and lacto-fermentation
			Table 4. Productivity and yield during fermentation with mono- and co-culture
			Strains	Day 1		Day 2		Day 3
				Productivity (g L−1 h−1)	Yield (%)	Productivity (g L−1 h−1)	Yield (%)	Productivity (g L−1 h−1)	Yield (%)
			2246	0.260 ± 0.006	23.458 ± 0.566	0.223 ± 0.011	40.297 ± 1.941	0.137 ± 0.002	37.061 ± 0.538	37.061
			2240	0.234 ± 0.008	21.105 ± 0.694	0.209 ± 0.010	37.721 ± 1.811	0.128 ± 0.003	34.580 ± 0.894	34.58
			1019	0.169 ± 0.009	15.267 ± 0.793	0.152 ± 0.005	27.347 ± 0.859	0.128 ± 0.005	34.580 ± 1.231	34.58
			2246/2240	—	—	—	—	0.146 ± 0.007	39.555 ± 1.773	39.555
			2240/1019	—	—	—	—	0.147 ± 0.007	39.807 ± 1.996	39.807
			2246/1019	—	—	—	—	0.140 ± 0.001	37.795 ± 0.320	37.795
			1019/2240	addition of L. casei 2240 after 2 days of fermentation (8 log CFU mL−1)				0.142 ± 0.012	38.523 ± 3.131	38.523
			1019/2246	addition of L. casei 2246 after 2 days of fermentation (8 log CFU mL−1)				0.142 ± 0.012	38.523 ± 3.131	38.523
			2240/2246	addition of L. casei 2246 after 2 days of fermentation (8 log CFU mL−1)				0.143 ± 0.002	38.631 ± 0.513	38.631
			Note: The results were expressed as the mean value ± the confidence limit for a probability of 95%.
			avrg yield %	37.6728
			sugar in orange peel %	15.7576
			yield g LA/g orange	0.0593633
		ref 4	https://link.springer.com/article/10.1007/s13399-019-00396-3
			Production of D-lactic acid by L. delbrueckii growing on orange peel waste hydrolysates and model monosaccharide solutions: effects of pH and temperature on process kinetics
			Table 1 Influences of temperature (in stirred bottle at pH 5.4), pH (in bioreactor at 40 °C), and substrate (real OPWH with MRS and CSL broths, at 40 °C and pH 5.8) on the titer (CPmax), yield (YP,S), productivity (P), and purity (% D-LA) of D-lactic acid, and on growth rate (μbiomass) and on glucose uptake rate (RG) in the exponential phase (4–8 h)
			From: Production of D-lactic acid by L. delbrueckii growing on orange peel waste hydrolysates and model monosaccharide solutions: effects of pH and temperature on process kinetics
			RUN	T (°C)	CPmax (g/L)	YP,S (g/g)	P (g/L·h)	% D-LA	μbiomass (gX/(L·h))	RG (gG/(L·h))
			1	35	44.3 ± 1.2	0.84 ± 0.08	1.84 ± 0.12	95.5 ± 2.1	0.9 ± 0.1	4.5 ± 0.7
			2	37	50.5 ± 1.7	0.85 ± 0.11	2.10 ± 0.18	95.9 ± 1.9	1.2 ± 0.2	7.5 ± 0.8
			3	40	51.9 ± 1.4	0.88 ± 0.09	2.16 ± 0.17	95.9 ± 1.8	1.2 ± 0.2	7.5 ± 0.6
			4	43	49.3 ± 1.5	0.84 ± 0.08	2.05 ± 0.09	93.9 ± 2.2	1.2 ± 0.1	6.2 ± 0.4
			5	47	39.1 ± 1.6	0.82 ± 0.06	1.68 ± 0.08	93.4 ± 2.3	0.6 ± 0.1	2.5 ± 0.3
				pH	CPmax (g/L)	YP,S (g/g)	P (g/L·h)	% D-LA	μbiomass (gX/(L·h))	RG (gG/(L·h))
			6	5	38.6 ± 1.4	0.75 ± 0.07	1.60 ± 0.17	98.4 ± 2.3	1.0 ± 0.2	5.5 ± 0.7
			7	5.2	42.1 ± 1.3	0.75 ± 0.05	1.76 ± 0.14	97.5 ± 1.8	1.1 ± 0.2	7.1 ± 0.5
			8	5.5	49.7 ± 1.8	0.87 ± 0.04	2.06 ± 0.09	98.5 ± 1.9	1.7 ± 0.3	8.5 ± 0.9
			9	5.8	51.3 ± 1.6	0.88 ± 0.08	2.56 ± 0.32	97.3 ± 1.4	2.7 ± 0.3	12.5 ± 1.3
			10	6	49.8 ± 1.5	0.87 ± 0.09	2.49 ± 0.08	97.1 ± 1.6	2.5 ± 0.2	10.5 ± 1.1
			11	6.2	50.4 ± 1.3	0.87 ± 0.12	2.52 ± 0.11	98.1 ± 2.1	2.3 ± 0.2	9.5 ± 0.8
			12	OPWH-MRS	48.6 ± 1.6	0.86 ± 0.06	2.02 ± 0.14	97.7 ± 1.8	2.7 ± 0.2	11.5 ± 0.8
			13	OPWH-CSL	49.6 ± 1.8	0.83 ± 0.06	1.71 ± 0.07	98.1 ± 1.7	0.9 ± 0.1	5.8 ± 0.6
			Note: OPWH-MRS stands for orange peel hydrolysate with MRS broth components
			OPWH-CSL means orange peel hydrolysate supplemented with corn steep liquor
				YP,S (g/g)
				0.84
				0.85
				0.88
				0.84
				0.82
				0.75
				0.75
				0.87
				0.88
				0.87
				0.87
				0.86
				0.83
			avrg	0.839231
			sugar in orange peel %	15.7576
			yield g LA/g orange	0.132243
		ref 5	https://link.springer.com/article/10.1007/s00253-018-9432-4
			Production of D-lactic acid by Lactobacillus delbrueckii ssp. delbrueckii from orange peel waste: techno-economical assessment of nitrogen sources
			Finally, orange peel waste hydrolysate supplemented with 37 g/l CSL has been employed for D-lactic acid production, reaching a final yield of 88% and a productivity of 2.35 g/l h.
			yield %	88
			sugar in orange peel %	15.7576
			yield g LA/g orange	0.138667
sorbitol	orange	theoretical	https://link.springer.com/article/10.1007/s00253-002-1046-0
			The biotechnological production of sorbitol
			avrg conversion of glucose and fructose %	95.2
			yield g/g glucose and fructose	0.962578
			glu+ fru in orange %	8.79053
			yield g/g orange	0.0846157
sorbitol	orange peel	theoretical	https://link.springer.com/article/10.1007/s00253-002-1046-0
			The biotechnological production of sorbitol
			avrg conversion of glucose and fructose %	95.2
			yield g/g glucose and fructose	0.962578
			glu+ fru in orange peel %	15.7576
			yield g/g orange peel	0.151679
xylitol	orange	theoretical	https://www.sciencedirect.com/science/article/pii/S0922338X98800263?casa_token=aLqBeV90biIAAAAA:uqYoRDUYXPdbjyYra-122gWl9FVoabLSx-h_EHf6fDpWVOsKLf0qIS6Sd5kzioR63hHTDi8
			Microbial conversion of d-xylose to xylitol
			avrg Yx/s (g xylitol/g xylose)	0.485909
			xylose in orange %	2.85
			yield (g xylitol / g orange)	0.0138484
xylitol	orange peel	theoretical	https://www.sciencedirect.com/science/article/pii/S0922338X98800263?casa_token=aLqBeV90biIAAAAA:uqYoRDUYXPdbjyYra-122gWl9FVoabLSx-h_EHf6fDpWVOsKLf0qIS6Sd5kzioR63hHTDi8
			Microbial conversion of d-xylose to xylitol
			avrg Yx/s (g xylitol/g xylose)	0.485909
			xylose in orange peel %	0
			yield (g xylitol / g orange peel)	0

## Sheet: banana
ethanol	banana	ref 1	https://www.sciencedirect.com/science/article/pii/S0961953411001413?via%3Dihub#tbl4
			Energy and carbon footprints of ethanol production using banana and cooking banana discard: A case study from Costa Rica and Ecuador
			Table 4. Production data of the Ecuador case studies.
			Empty Cell	Organic farms (Chimborazo-Guayas)		Conventional farms (Guayas)
			Average farm size (ha)	31.3		2.7
			Varieties	Bocadillo	Tafetan	Cavendish
			Average area banana cultivation (ha)	13.3	6.7	2.5
			# Plants ha−1	1112	625	1216
			Bunch weight (kg)	13.5	16.2	28
			Production cycle (month)	9	11	10
			Yield (t ha−1 y−1)	19.5	11.1	40.9
			Discard (%)	8.3	8.3	8.3
			Discard biomass (t ha−1 y−1)	1.6	0.9	3.4
			Pulp biomass from discard (t ha−1 y−1)	0.96	0.61	2.1
			Dry matter discard biomass (kg ha−1 y−1)	331.2	163.6	695.9
			EtOH production potential (l t−1 dm)	548.6	533.3	458.7
			EtOH production potential (l t−1 fw)	157.2	131.1	111.5
			EtOH per bunch (l)	2.1	2.1	3.1
			EtOH from discard (l ha−1 y−1)	139.8	74.5	266
			EtOH from discard per farm (l y−1)	2358		665
			avrg EtOH production potential (l t−1 fw)	133.267
			density EtOH (g/L)	789
			avrg EtOH yield g/g fresh weight	0.105147
		ref 2	https://www.sciencedirect.com/science/article/pii/S0360544210001817#tbl6
			Ethanol production process from banana fruit and its lignocellulosic residues: Energy analysis
			Table 6. Performance indicators.
			Indicator	Units	Amylaceous material		Lignocellulosic material
					Banana pulp	Banana fruit	Flower stalk	Banana skin
			ηm (the volume of bio-fuel produced (Vp) in relation to 1 t of dry biomass (mb))	L/tdry biomass	388.7	346.5	123.5	86.1
			ρG	L/ha	3696	4495	46	298.1
			ρEn	MJ/ha	77850	94670	963.3	627.9
			NEV	MJ/Lethanol	9.86	9.94	8.79	5.24
			Energy ratio	MJ/MJ	1.9	1.9	1.6	1.3
			dry matter in banana % wet weight	0.219
			density EtOH (g/L)	789
			EtOH L/t wet wight	75.8835
			EtOH yield g/g fresh weight	0.0598721
		ref 3	https://iopscience.iop.org/article/10.1088/1742-6596/2049/1/012084/pdf
			Dynamic Simulation of Bioethanol Production from Banana Rejected using Flocculating Yeast
			Table 1: Kinetic parameter used for simulations
				𝑌𝑥𝑠 is the yield of Saccharomyces cerevisiae cells produced per unit of glucose consumed
				𝑃 is the bioethanol concentration
			Y x/s (g/g)	0.076
			Y p/x (g/g)	3.66
			Y p/s (g/g) g ethanol/g sugar	0.27816
			sugar in banana	0.163705
			Yield (g/g) g ethanol/g banana	0.0455363
		ref 4	https://www.scopus.com/record/display.uri?eid=2-s2.0-84893926485&origin=resultslist&sort=r-f&src=s&sid=2000dec68bbc9a91a692683d626c4879&sot=b&sdt=b&s=TITLE-ABS-KEY%28%28+%22banana%22+%29+AND+%28+%22ethanol+production%22+%29+AND+NOT+%28+%22peel%22+OR+%22stem%22+OR+%22leaf%22+%29%29&sl=55&sessionSearchId=2000dec68bbc9a91a692683d626c4879&relpos=7
			Comparison of biomass and ethanol production kinetics of commercial baker's yeast (S. Cerevisiae) in a chemically defined medium against cane molasses, waste Banana pulp and waste potato flour
			Among sugary wastes, waste Banana pulp shows maximum ethanol Conc., maximum ethanol productivity and maximum % sugar utilization i.e. 39.261 g/L, 0.238 g/Lh and 84.73 respectively.
			Ethanol yield (g/g) Weight of ethanol produces/Mass of glucose utilized	0.452
			glucose in banana	0.0856526
			Yield (g/g) g ethanol/g banana	0.038715
		ref 5	https://link.springer.com/article/10.1007/s11274-023-03588-2#Tab1
			From: Fruit residues as biomass for bioethanol production using enzymatic hydrolysis as pretreatment
			Table 1 Fermentation kinetics data at the beginning and end of the process.
								Y P/RS	Reducing Sugars to Etanol conversion
								0.159
								0.182
			avrg Y p/rs (g/g) g ethanol/g sugar	0.1705
			sugar in banana	0.163705
			Yield (g/g) g ethanol/g banana	0.0279117
	banana peel		https://link.springer.com/article/10.1007/s00449-020-02442-1
			sugar content
			Table 2 Yield of carbohydrates and TPC obtained from banana peels after acid and alkaline pretreatments
							glu	xyl	ara	XOS		glu %	xyl %	ara %	XOS %
							48.8	348.5	7.1	17.3		0.1157	0.8261	0.0168	0.041
							68.6	159.7	125.8	27.1		0.1798	0.4188	0.3301	0.0712
							38.6	225.3	174	26.4		0.0831	0.4853	0.3748	0.0568
											avrg	0.1262	0.576733	0.240567	0.0563333
		ref 1	https://www.sciencedirect.com/science/article/pii/S1364032123009486?via%3Dihub#tbl2
			Ethanologenic yeasts from Ethiopian fermented beverages and optimization of fermentation conditions
			Table 2. Sugar utilization percentage and ethanol yield parameters of selected isolates after 72 h of incubation at 30 OC.
			Isolate	SU (%)	EC (g/L)	YE (g/L)	FE (%)	EP (g/L/h)	YoE (g/Kg)	Yield of Ethanol (g/Kg) of biomass	Yield of Ethanol g/g
			GB1D5	87.1 ± 0.4a	12.9 ± 0.3b	0.4 ± 0.0a	78.9 ± 1.1b	0.2 ± 0.0a	161.7 ± 6.9b	161.7	0.1617
			RTj3D3	87.3 ± 0.5a	11.6 ± 0.9b	0.4 ± 0.0a	68.8 ± 6.0c	0.2 ± 0.0a	144.8 ± 23.0c	144.8	0.1448
			DMTD2	87.6 ± 1.1a	11.8 ± 1.1b	0.4 ± 0.0a	70.4 ± 7.9c	0.2 ± 0.0a	147.5 ± 26.2c	147.5	0.1475
			Sc ©DB	88.8 ± 4.0a	18.5 ± 2.1a	0.5 ± 0.1a	92.1 ± 2.8a	0.2 ± 0.0a	217.9 ± 24.3a	217.9	0.2179
			Key: Mean values superscripted with different letter across the column are significantly different at p-value ≤0.05. SU (Sugar Utilization); EC (Ethanol Content), YE (Practical Ethanol Yield), FE (Fermentation Efficiency), EP (Ethanol Productivity) and YoE (Yield of Ethanol (g/L/Kg) of biomass).
			avrg yield ethanol g/g dry biomass	0.167975
			DM in fresh banana peel %	15.4
			yield ethanol g/g fresh banana peel	0.0258681
		ref 2	https://link.springer.com/article/10.1007/s13399-020-00880-1
			Table 3 Prediction of ethanol production capacity of banana peels																	Table 1 Standardized yield of dry banana peels from raw banana. Each group contains 4 bananas
			From: Ethanol production by Klebsiella sp. SWET4 using banana peel as feasible substrate																	From: Ethanol production by Klebsiella sp. SWET4 using banana peel as feasible substrate
			Prediction data set	Raw banana	Dried banana peel (A)	Lowest available biomass for fermentation	Available Carbon		Predicted ethanol production				Predicted lowest and highest volume of ethanol (ethanol density of 0.789 kg/l) (million liters)							Group no. (25 groups)	Weight of raw fruits (g)	Weight of peels (g)	Weight of dried peels (g)
																				Mean	648.7	128.9	25.1
				(million tons)	(million tons)	(A′ = A* 31.99/100)														Standard deviation	± 21.3	± 8.8	± 6.4
							Proximity analysis (B)	CHN analysis	The whole of Carbon is converted to ethanol		The whole of Carbon is in form of glucose or glucose polymers and whole of them is converted to ethanol (million tons)									dried peels/peels	0.194725
						(million tons)
							[B = (A′*9.87)/100]	(B′) [B′ = (A′*33.65)/100]	(million tons)
							(million tons)	(million tons)	From Proximity analysis	From CHN analysis	From Proximity analysis	From CHN analysis
									[46xB/24)	[46xB′/24]	[Bx92/72]	[B′×92/72]			wet banana peels (Mton)	Predicted lowest volume of ethanol	Predicted highest volume of ethanol (million liters)	avrg volume of ethanol (million liters)	ethanol L/ton peel	ethanol g/g peel
			Lab data	648.7	25.1	8.03	0.79	2.7	1.51	5.17	1.01	3.45	0.001 to 0.006		128.9
			(mass units are in g and volume unit in l)													0.001	0.006	0.0035	2.71528e-05	2.14236e-08
			Andhra Pradesh (annual production in 2017–2018)	5003.07	193.58	61.93	6.11	20.83	11.71	39.98	7.8	26.61	9885.93 to 50,671.73		994.122	9885.93	50671.7	30278.8	30.4579	0.0240313
			Maharashtra (annual production in 2017–2018)	4209.27	162.87	52.1	5.14	17.54	9.85	33.62	6.56	22.41	8314.32 to 42,610.89		836.412	8314.32	42610.9	25462.6	30.4427	0.0240193
			Tamil Nadu (annual production in 2017–2018)	3205.04	124.01	39.67	3.91	13.35	7.5	25.59	4.99	17.05	6324.46 to 32,433.46		636.848	6324.46	32433.5	19379	30.4295	0.0240089
			India (annual production in 2017–2018)	30807.5	1192.03	381.33	37.64	128.31	72.14	245.92	48.1	163.95	60,963.24 to 311,685.67		6121.62	60963.2	311686	186324	30.4371	0.0240149
																			avrg	0.0240186
		ref 3	https://www.sciencedirect.com/science/article/pii/S0964830519306900?via%3Dihub#tbl1
			Production of ethanol by Enterobacter sp. EtK3 during fruit waste biotransformation
			Table 1. Different growth and production parameters calculated from the kinetic study.
			Parameters	Equations	Values
			Specific growth rate, ms	1/(t2-t1) * ln (X2/X1)	0.145 h−1
			Doubling time, td	(t2-t1) * log 2/log (X2/X1)	4.79 h−1
			Biomass productivity, pX	(Xm-X0)/tm	0.168 mg h−1
			Biomass yield, Yx/s	(Xm-X0)/(S0–S)	0.538 mg mg−1
			Specific glucose uptake rate, qS	(S0-Sf)/(tf * (Xf-X0))	0.053 h−1
			EtOH productivity, pE	(Ef-E0)/tf	0.058 mg h−1
			EtOH yield, Yp/s	(Em-E0)/(S0–S)	0.236 mg mg−1	0.236
			Specific EtOH production rate, qE	(Em-E0)/(tf *(Xf-X0))	0.012 h−1
			EtOH yield, Yp/s (g/g glucose)	0.236
			glucose in banana peel %	0.255
			EtOH yield, Yp/s (g/g peel)	0.06018
		ref 4	https://www.sciencedirect.com/science/article/pii/S0956053X11000742?via%3Dihub#t0030
			Ethanol production from banana peels using statistically optimized simultaneous saccharification and fermentation process
			Table 6. Ethanol productivity parameters at a batch-scale fermenter level using optimized parameters obtained through RSM.
			Incubation time (h)	Ethanol product yield on biomass basis (g/g)	Ethanol product yield on sugar basis (g/g)	Ethanol product yield on sugar consumed basisa (Yp/s)	Volumetric product yield (g/l/h)
			3	0.06	0.08	0.14	2
			6	0.19	0.26	0.33	3.2
			9	0.24	0.33	0.38	2.6
			12	0.28	0.38	0.42	2.3
			15	0.29	0.38	0.43	1.9
			a
			Residual sugars not fermented by the yeast strain were deducted while making calculations for Y(p/s).
			avrg Ethanol product yield on sugar basis (g/g)	0.286
			sugar in banana peel %	49.2012
			Ethanol product yield on banana peel basis (g/g)	0.140715
		ref 5	https://link.springer.com/article/10.1007/s12088-007-0057-z
			Optimization of fermentation parameters for production of ethanol from kinnow waste and banana peels by simultaneous saccharification and fermentation
						ethanol yield (g/g)
						0.226
						0.283
						0.371
						0.378
						0.359
						0.32
			ethanol yield (g/g sugar)	0.322833
			sugar in banana peel %	49.2012
			Ethanol product yield on banana peel basis (g/g)	0.158838
furfural	banana	theoretical	https://ift.co.za/media/mediafiles/archive/SAIChE%20Congress%202003%20Arnold%20and%20Buzzard%20paper.pdf
			A NOVEL PROCESS FOR FURFURAL PRODUCTION
			𝒀_(𝒇𝒖𝒓𝒇𝒖𝒓𝒂𝒍/𝒙𝒚𝒍𝒐𝒔𝒆 )	0.7272
			xylose content	0
			Y furfural / biomass	0
furfural	banana peel	theoretical	https://ift.co.za/media/mediafiles/archive/SAIChE%20Congress%202003%20Arnold%20and%20Buzzard%20paper.pdf
			A NOVEL PROCESS FOR FURFURAL PRODUCTION
			𝒀_(𝒇𝒖𝒓𝒇𝒖𝒓𝒂𝒍/𝒙𝒚𝒍𝒐𝒔𝒆 )	0.7272
			xylose content	0.237023
			Y furfural / biomass	0.172363
HMF	banana	theoretical	HMF formation reactions (i.e., glucan hydrolysis, glucose isomerization, and fructose dehydration)
			C6H12O6 (Fructose) → C5H4O2CHO (Furfural) + 2H2O.
			180	126
			theoretical yield g/g fructose+glucose	0.7
			fructose+glucose in banana %	16.3705
			theoretical yield g/ g banana	0.114594
HMF	banana peel	theoretical	HMF formation reactions (i.e., glucan hydrolysis, glucose isomerization, and fructose dehydration)
			C6H12O6 (Fructose) → C5H4O2CHO (Furfural) + 2H2O.
			180	126
			theoretical yield g/g fructose+glucose	0.7
			fructose+glucose in banana %	25.4989
			theoretical yield g/ g banana	0.178492
HMF	banana peel	ref 1	https://www.sciencedirect.com/science/article/pii/S1226086X14006996?via%3Dihub#tbl0015
			Fenton-mediated production of hydroxymethylfurfural (HMF) from banana waste
			The conversion rate and HMF yield were evaluated considering values from both the aqueous and organic phases.
			Table 3. Conversion of raw biomass as a starting material to HMF using various methods.
			Substrate (starting material)	Method (solvent/catalyst (if any))	Yield (%)	Reference number
			Sugarcane bagasse	Hot compressed water (HCW) method (water)	3	[30]
			Cellulose	Hydrothermal treatment (water/HCl or NaOH)	20	[31]
			Cotton	Catalytic pyrolysis (sulfolane/sulfuric or polyphosphoric acid)	8	[32]
			Pine wood	Ionic liquid under microwave irradiation ([C4MIM]Cl/CrCl3 ·6H2O)	52	[33]
			Jerusalem artichoke	Hydrolysis and dehydration with catalyst (H2O:2-butanol/Nb2O5 with H3PO4)	22	[34]
			Girasol and potato tuber	Extraction with ionic liquid ([OMIM]Cl/CrCl2)	54 and 58, respectively	[35]
			Banana peel	Fenton reaction (H2O:2-butanol)	42	–
			yield g HMF/g banana peel	0.42
		ref 2	https://www.sciencedirect.com/science/article/pii/S0960852422011129?via%3Dihub
			Semisynthetic transformation of banana peel to enhance the conversion of sugars to 5-hydroxymethylfurfural
			Under identical reaction conditions, direct conversion of untreated BP to HMF yielded 22.7 mol% HMF, suggesting that mechanoenzymatic hydrolysis greatly promotes the release of sugars from BP to improve HMF yield.
			Yield HMF (mol%)	22.7
			the conversion of the resulting monosaccharides into HMF in the presence of the AlCl3·H2O/HCl-DMSO/H2O system resulted in 71.9 mol% yield
			Yield HMF (mol%)	71.9
			Yield HMF (mol%)	22.7
			Yield HMF (mol%)	71.9
			avrg Yield HMF (mol%)	47.3
			Glu and Fru in banana peel g/g	0.254989
			Glu and Fru in banana peel mol/g	0.0014166
			HMF mol /g rice	0.000670054
			HMF from rice g/g	0.0844268
FDCA	banana	theoretical	https://www.researchgate.net/figure/Theoretical-and-Overall-Yield-for-the-Conversion-of-Pure-Sugars-to-Ethylene-via-Ethanol_tbl6_259752935
			Chemocatalytic Processes for the Production of Bio-Based Chemicals from Carbohydrates
			theoretical yield FDCA from sugar g/g	0.867
			fru+glu in banana %	16.3705
			theoretical yield FDCA from banana g/g	0.141932
	banana peel	theoretical	https://www.researchgate.net/figure/Theoretical-and-Overall-Yield-for-the-Conversion-of-Pure-Sugars-to-Ethylene-via-Ethanol_tbl6_259752935
			Chemocatalytic Processes for the Production of Bio-Based Chemicals from Carbohydrates
			theoretical yield FDCA from sugar g/g	0.867
			fru+glu in banana peel %	25.4989
			theoretical yield FDCA from banana peel g/g	0.221075
Isoprene	banana	theoretical	glucose in banana	8.56526
			yield (isoprene/banana)	0.0145609
	banana peel	theoretical	glucose in banana peel	25.4989
			yield (isoprene/banana peel)	0.0433481
succinic acid	banana	theoretical	yield g/g sugar	0.667143
			glu+fru+xyl in banana	16.3705
			succinate yield g/g banana	0.109215
	banana peel	theoretical	yield g/g sugar	0.667143
			glu+fru+xyl in banana peel	49.2012
			succinate yield g/g banana peel	0.328242
3-HP	banana	theoretical	yield g/g sugar	0.2365
			glucose in banana	8.56526
			yield (3-HP/banana)	0.0202568
	banana peel	theoretical	yield g/g sugar	0.2365
			glucose in banana peel	25.4989
			yield (3-HP/banana peel)	0.0603049
levulinic acid	banana	theoretical	Theoretical yield (g/g hexos)	0.521033
			glu+fru banana (g/100g)	16.3705
			Theoretical yield (g/g banana)	0.0852959
levulinic acid	banana peel	theoretical	Theoretical yield (g/g hexos)	0.521033
			glu+fru banana peel (g/100g)	25.4989
			Theoretical yield (g/g banana peel)	0.132858
lactic acid	banana	theoretical	https://link.springer.com/article/10.1007/s10570-019-02571-1
			Bioprocessing of rice husk into monosaccharides and the fermentative production of bioethanol and lactate
			YLA lactic acid yield expressed as percentage of theoretical lactic acid yield (0.76 g lactic acid per g sugar)
			theoretical yield (g lactic acid per g sugar)	0.76
			sugar from banana g/g	16.3705
			theoretical yield (g lactic acid per g banana)	0.124416
	banana peel	ref 1	https://www.sciencedirect.com/science/article/pii/S2589014X1930146X?via%3Dihub#t0010
			Free-nutrient supply and thermo-alkaline conditions for direct lactic acid production from mixed lignocellulosic and food waste materials
			Table 2. Effect of solid-to-liquid ratios on fermentation parameters for lactic acid production from banana peels by E. faecium strain FW26.
			Solid-to-liquid ratio (w/v)	Total viable count (cell ∗ 1010/ml media)	Consumed sugar (g L−1)	LA conc. (g L−1)a	YLA (g g−1)b	PLA (g L−1 h−1)c	Max PLA (g L−1 h−1)d
			01:05:00	77.0 ± 1.41	8.40 ± 0.5	6.26 ± 0.3	0.75	0.13	0.34 (6 h)
			01:06:00	72.0 ± 4.24	8.30 ± 0.0	6.40 ± 0.4	0.77	0.13	0.34 (6 h)
			01:07:00	91.0 ± 2.82	13.1 ± 0.2	9.43 ± 1.2	0.72	0.2	0.44 (6 h)
			01:08:00	106 ± 9.19	13.8 ± 0.6	12.1 ± 0.4	0.88	0.25	0.47 (24 h)
			01:09:00	86.0 ± 4.24	16.4 ± 0.5	14.5 ± 0.5	0.88	0.3	0.64 (12 h)
			01:10:00	121 ± 14.1	17.9 ± 0.8	15.9 ± 0.9	0.89	0.33	0.73 (12 h)
			01:15:00	95.0 ± 11.3	13.3 ± 0.3	11.1 ± 0.2	0.83	0.23	0.41 (24 h)
			01:20:00	86.5 ± 13.4	13.3 ± 0.3	11.2 ± 0.7	0.84	0.23	0.41 (24 h)
			01:25:00	100 ± 3.54	14.0 ± 0.2	11.7 ± 0.6	0.83	0.24	0.50 (24 h)
			avrg yield g g−1-consumed sugars	0.821111
			sugar in banana peel	49.2012
			yield g g−1 banana peel	0.403996
		ref 2	https://www.sciencedirect.com/science/article/pii/S1878818119307340?via%3Dihub#tbl3
			Effective biorefinery approach for lactic acid production based on co-fermentation of mixed organic wastes by Enterococcus durans BP130
			Table 3. Effect of banana peels concentrations on growth, sugar consumption and lactic acid production by E. durans BP130.
			Conc. of banana peels % (w-dry matter/v)	Total Viable Cells × 1010 (cfu/ml)	Consumed sugar (g L−1)	LA conc. (g L−1)a	LA yield (g g−1)b	PLA (g L−1 h−1)c	Max PLA (g L−1 h−1)d
			4	346 ± 18	13.9 ± 0.8	11.2 ± 0.4	0.8	0.23	0.47 (12 h)
			5	323 ± 9.2	16.8 ± 1.5	12.9 ± 0.1	0.77	0.27	0.53 (12 h)
			6.7	338 ± 9.9	21.2 ± 0.6	19.2 ± 0.4	0.9	0.4	1.2 (12 h)
			10	250 ± 16	21.8 ± 1.0	18.8 ± 0.6	0.86	0.39	1.0 12 h)
			11.1	218 ± 9.2	19.5 ± 0.5	16.4 ± 0.5	0.84	0.34	1.1 (12 h)
			12.5	167 ± 23	13.1 ± 0.3	11.3 ± 0.5	0.87	0.24	0.51 (6 h)
			14.3	129 ± 3.5	10.9 ± 0.1	8.20 ± 0.1	0.75	0.17	0.41 (6 h)
			16.7	118 ± 7.8	7.4 0± 0.2	6.10 ± 0.1	0.82	0.13	0.36 (6 h)
			20	91.5 ± 11	5.10 ± 0.1	3.20 ± 0.1	0.62	0.07	0.35 (6 h)
			avrg yield	0.803333
			sugar in banana peel	49.2012
			yield g g−1 banana peel	0.395249
sorbitol	banana	theoretical	https://link.springer.com/article/10.1007/s00253-002-1046-0
			The biotechnological production of sorbitol
			avrg conversion of glucose and fructose %	95.2
			yield g/g glucose and fructose	0.962578
			glu+ fru in banana %	16.3705
			yield g/g banana	0.157579
sorbitol	banana peel	theoretical	https://link.springer.com/article/10.1007/s00253-002-1046-0
			The biotechnological production of sorbitol
			avrg conversion of glucose and fructose %	95.2
			yield g/g glucose and fructose	0.962578
			glu+ fru in banana peel %	25.4989
			yield g/g banana peel	0.245447
Xylitol	banana	theoretical	https://www.sciencedirect.com/science/article/pii/S0922338X98800263?casa_token=aLqBeV90biIAAAAA:uqYoRDUYXPdbjyYra-122gWl9FVoabLSx-h_EHf6fDpWVOsKLf0qIS6Sd5kzioR63hHTDi8
			Microbial conversion of d-xylose to xylitol
			avrg Yx/s (g xylitol/g xylose)	0.485909
			xylose in banana %	0
			yield (g xylitol / g banana)	0
	banana peel	ref 1	https://www.mdpi.com/2076-3417/11/12/5516
			Biovalorization of Lignocellulosic Materials for Xylitol Production by the Yeast Komagataella pastoris
			Table 3. Substrate consumption, cell dry weight (CDW), xylitol and arabitol production, after 120 h of cultivation.
			Raw Hydrolysate	Banana Peels	BSG	Corncobs	Grape Pomace	Grape Stalks	Sawdust
			Initial glucose (g/L)	8.2 ± 0.6	6.4 ± 2.3	2.3 ± 0.4	1.7 ± 0.5	8.0 ± 0.7	1.7 ± 0.2
			Glucose consumed (g/L)	8.2 ± 1.5	4.9 ± 0.9	0.7 ± 0.1	1.7 ± 0.3	6.7 ± 1.2	0.1 ± 0.0
			Initial xylose (g/L)	1.2 ± 1.1	8.9 ± 2.6	8.2 ± 1.5	3.1 ± 1.3	5.5 ± 1.1	10.8 ± 1.9
			Xylose consumed (g/L)	1.0 ± 0.4	2.3 ± 0.9	2.2 ± 0.8	1.7 ± 0.6	3.1 ± 1.2	0.5 ± 0.2
			Initial arabinose (g/L)	1.4 ± 0.3	6.2 ± 2.1	0.9 ± 0.2	0.9 ± 0.3	1.9 ± 0.7	0.4 ± 0.1
			Arabinose consumed (g/L)	0.4 ± 0.1	0.4 ± 0.1	0.1 ± 0.0	0.2 ± 0.1	0.4 ± 0.1	0.1 ± 0.0
			CDW (g/L)	15.18 ± 0.33	5.70 ± 0.94	13.70 ± 0.15	7.08 ± 0.17	14.58 ± 0.19	0.92 ± 0.09
			Xylitol (g/L)	0.06 ± 0.01	1.51 ± 0.07	0.81 ± 0.05	0.36 ± 0.07	0.78 ± 0.04	0.02 ± 0.01
			Arabitol (g/L)	0.02 ± 0.01	0.90 ± 0.09	0.21 ± 0.03	0.21 ± 0.02	0.34 ± 0.04	0.07 ± 0.01
			yield g Xylitol/ g Xylose	0.06
			xylose in banana peel g / g	23.7023
			yield g Xylitol/ g banana peel	0.0142214
		theoretical	https://www.sciencedirect.com/science/article/pii/S0922338X98800263?casa_token=aLqBeV90biIAAAAA:uqYoRDUYXPdbjyYra-122gWl9FVoabLSx-h_EHf6fDpWVOsKLf0qIS6Sd5kzioR63hHTDi8
			Microbial conversion of d-xylose to xylitol
			avrg Yx/s (g xylitol/g xylose)	0.485909
			xylose in banana peel %	23.7023
			yield (g xylitol / g banana peel)	0.115171

## Sheet: potato
		sugar content	https://www.sciencedirect.com/science/article/pii/S0141813018353625#t0015
			Characterization of physicochemical properties of cellulose from potato pulp and their effects on enzymatic hydrolysis by cellulase
			Table 1. Yield and composition of de-starched potato pulp, alkali-treated potato pulp, cellulose from potato pulp and cellulose from corn stalk.
			Samples	Composition (g/100 g of sample)
				Solid yield	Glucan	Xylan	Lignin	Galacturonic acid	Glucan	Xylan	Lignin	Galacturonic acid	Glucan ratio	Xylan ratio
			De-starched potato pulp	100	48.30 ± 0.7	17.42 ± 0.5	4.75 ± 0.6	16.19 ± 0.5	48.3	17.42	4.75	16.19	0.265516	0.0957616
			Alkali-treated potato pulp	49.9	71.75 ± 0.9	9.42 ± 0.3	1.65 ± 0.5	5.58 ± 0.3	71.75	9.42	1.65	5.58	0.5188	0.0681128
			Cellulose from potato pulp	24.74	81.34 ± 1.1	5.58 ± 0.4	0.72 ± 0.2	3.14 ± 0.4	81.34	5.58	0.72	3.14
			Cellulose from corn stalk	28.36	83.72 ± 0.8	8.28 ± 0.7	5.39 ± 0.5	N.D.
			N.D. = Not determined.									avrg	0.392158	0.0819372
ethanol	potato pulp	ref 1	https://link.springer.com/article/10.1186/s13068-016-0464-7
ethanol	potato pulp		An environmentally friendly and productive process for bioethanol production from potato waste
ethanol	potato pulp
ethanol	potato pulp		When the enzyme of T. reesei TX+ pectinase was added,
ethanol	potato pulp		the glucose concentration was 168.13 g/L after enzymatic
ethanol	potato pulp		hydrolysis, ethanol was 79.00 g/L and 2.46 g/L of glucose
ethanol	potato pulp		remained. Therefore, almost the entire glucose was converted
ethanol	potato pulp		into ethanol without supplementing any nitrogen
ethanol	potato pulp		source.
ethanol	potato pulp
ethanol	potato pulp		glucose concentration before( g/L)			168.13
ethanol	potato pulp		glucose concentration after( g/L)			2.46
ethanol	potato pulp		ethanol g/L			79
ethanol	potato pulp		ethanol/glucose			0.476852
ethanol	potato pulp		glucose in potato pulp			0.1173
ethanol	potato pulp		ethanol/potato pulp			0.0559347
ethanol	potato pulp
ethanol	potato pulp	ref 2	https://www.scientific.net/AMR.805-806.281
ethanol	potato pulp		Research on ethanol production by biological fermentation of potato pulp
ethanol	potato pulp
ethanol	potato pulp		Table 2 Orthogonal direct analysis table
ethanol	potato pulp		Experiment No.	Ethanol production (mL·g-1 )
ethanol	potato pulp		1	0.067
ethanol	potato pulp		2	0.183
ethanol	potato pulp		3	0.105
ethanol	potato pulp		4	0.076
ethanol	potato pulp		5	0.075
ethanol	potato pulp		6	0.146
ethanol	potato pulp		7	0.096
ethanol	potato pulp		8	0.048
ethanol	potato pulp		9	0.025
ethanol	potato pulp		avrg Ethanol production (mL·g-1 )	0.0912222
ethanol	potato pulp		Ethanol density g/L	789
ethanol	potato pulp		Ethanol production (g·g-1 )	0.0719743
ethanol	potato pulp
ethanol	potato pulp
ethanol	potato pulp		https://www.sciencedirect.com/science/article/pii/0032959293800126?via%3Dihub
ethanol	potato pulp		Utilization of potato pulp from potato starch processing
ethanol	potato pulp
ethanol	potato pulp		Ethanol production from the hydrolysate of cellulose/hemicellulose is not economic because of the low sugar concentration in the hydrolysate.
furfural	potato pulp	theoretical	https://ift.co.za/media/mediafiles/archive/SAIChE%20Congress%202003%20Arnold%20and%20Buzzard%20paper.pdf
furfural	potato pulp		A NOVEL PROCESS FOR FURFURAL PRODUCTION
furfural	potato pulp
furfural	potato pulp		𝒀_(𝒇𝒖𝒓𝒇𝒖𝒓𝒂𝒍/𝒙𝒚𝒍𝒐𝒔𝒆 )	0.7272
furfural	potato pulp		xylose content	0.00208727
furfural	potato pulp		Y furfural / biomass	0.00151786
furfural	potato	theoretical	https://ift.co.za/media/mediafiles/archive/SAIChE%20Congress%202003%20Arnold%20and%20Buzzard%20paper.pdf
furfural	potato		A NOVEL PROCESS FOR FURFURAL PRODUCTION
furfural	potato
furfural	potato		𝒀_(𝒇𝒖𝒓𝒇𝒖𝒓𝒂𝒍/𝒙𝒚𝒍𝒐𝒔𝒆 )	0.7272
furfural	potato		xylose content	0.002
furfural	potato		Y furfural / biomass	0.0014544
HMF	potato pulp	theoretical	HMF formation reactions (i.e., glucan hydrolysis, glucose isomerization, and fructose dehydration)
HMF	potato pulp		C6H12O6 (Fructose) → C5H4O2CHO (Furfural) + 2H2O.
HMF	potato pulp		180	126
HMF	potato pulp		theoretical yield g/g fructose+glucose	0.7
HMF	potato pulp		fructose+glucose in potato pulp %	11.7316
HMF	potato pulp		theoretical yield g/ g potato pulp	0.0821212
FDCA	potato pulp	theoretical	https://www.researchgate.net/figure/Theoretical-and-Overall-Yield-for-the-Conversion-of-Pure-Sugars-to-Ethylene-via-Ethanol_tbl6_259752935
FDCA	potato pulp		Chemocatalytic Processes for the Production of Bio-Based Chemicals from Carbohydrates
FDCA	potato pulp		theoretical yield FDCA from sugar g/g	0.867
FDCA	potato pulp		fru+glu in potato pulp %	11.7316
FDCA	potato pulp		theoretical yield FDCA from potato pulp g/g	0.101713
FDCA	potato	theoretical	https://www.researchgate.net/figure/Theoretical-and-Overall-Yield-for-the-Conversion-of-Pure-Sugars-to-Ethylene-via-Ethanol_tbl6_259752935
FDCA	potato		Chemocatalytic Processes for the Production of Bio-Based Chemicals from Carbohydrates
FDCA	potato		theoretical yield FDCA from sugar g/g	0.867
FDCA	potato		fru+glu in potato %	15.9902
FDCA	potato		theoretical yield FDCA from potato g/g	0.138635
Isoprene	potato pulp	theoretical	glucose in potato pulp	11.7316
Isoprene	potato pulp		yield (isoprene/potato pulp)	0.0199437
Isoprene	potato	theoretical	glucose in potato	15.6118
Isoprene	potato		yield (isoprene/potato pulp)	0.02654
succinic acid	potato pulp	theoretical	yield g/g sugar	0.667143
succinic acid	potato pulp		glu+fru+xyl in potato pulp	11.9403
succinic acid	potato pulp		succinate yield g/g potato pulp	0.079659
3-HP	potato pulp	theoretical	yield g/g sugar	0.2365
3-HP	potato pulp		glucose in potato pulp	11.7316
3-HP	potato pulp		yield (3-HP/potato pulp)	0.0277452
3-HP	potato	theoretical	yield g/g sugar	0.2365
3-HP	potato		glucose in potato	15.6118
3-HP	potato		yield (3-HP/potato pulp)	0.0369218
levulinic acid	potato pulp	theoretical	Theoretical yield (g/g hexos)	0.521033
levulinic acid	potato pulp		glu+fru potato pulp (g/100g)	11.7316
levulinic acid	potato pulp		Theoretical yield (g/g potato pulp)	0.0611255
levulinic acid	potato	theoretical	Theoretical yield (g/g hexos)	0.521033
levulinic acid	potato		glu+fru potato pulp (g/100g)	15.9902
levulinic acid	potato		Theoretical yield (g/g potato pulp)	0.0833141
lactic acid	potato pulp	theoretical	https://link.springer.com/article/10.1007/s10570-019-02571-1
			Bioprocessing of rice husk into monosaccharides and the fermentative production of bioethanol and lactate
			YLA lactic acid yield expressed as percentage of theoretical lactic acid yield (0.76 g lactic acid per g sugar)
			theoretical yield (g lactic acid per g sugar)	0.76
			sugar from potato pulp g/g	11.9403
			theoretical yield (g lactic acid per g potato pulp)	0.0907464
sorbitol	potato pulp	theoretical	https://link.springer.com/article/10.1007/s00253-002-1046-0
			The biotechnological production of sorbitol
			avrg conversion of glucose and fructose %	95.2
			yield g/g glucose and fructose	0.962578
			glu+ fru in potato pulp %	11.7316
			yield g/g potato pulp	0.112926
sorbitol	potato	theoretical	https://link.springer.com/article/10.1007/s00253-002-1046-0
			The biotechnological production of sorbitol
			avrg conversion of glucose and fructose %	95.2
			yield g/g glucose and fructose	0.962578
			glu+ fru in potato %	15.9902
			yield g/g potato	0.153918
Xylitol	potato pulp	theoretical	https://www.sciencedirect.com/science/article/pii/S0922338X98800263?casa_token=aLqBeV90biIAAAAA:uqYoRDUYXPdbjyYra-122gWl9FVoabLSx-h_EHf6fDpWVOsKLf0qIS6Sd5kzioR63hHTDi8
			Microbial conversion of d-xylose to xylitol
			avrg Yx/s (g xylitol/g xylose)	0.485909
			xylose in potato pulp %	0.208727
			yield (g xylitol / g potato pulp)	0.00101422
Xylitol	potato pulp	theoretical	https://www.sciencedirect.com/science/article/pii/S0922338X98800263?casa_token=aLqBeV90biIAAAAA:uqYoRDUYXPdbjyYra-122gWl9FVoabLSx-h_EHf6fDpWVOsKLf0qIS6Sd5kzioR63hHTDi8
			Microbial conversion of d-xylose to xylitol
			avrg Yx/s (g xylitol/g xylose)	0.485909
			xylose in potato %	0.2
			yield (g xylitol / g potato)	0.000971818
ehtnaol	potato	ref 1	https://www.mdpi.com/2076-3417/2/4/738
ehtnaol	potato		Ethanol Production from Waste Potato Mash by Using Saccharomyces Cerevisiae †
ehtnaol	potato		Yields of the fermentations (product produced/substrate consumed) were similar; 46.23% and 44.55% for controlled and uncontrolled pH profiles, respectively.
ehtnaol	potato		Enzymatically hydrolyzed waste potato mash at pH 5.5 and 30 °C after 48 h of fermentation
ehtnaol	potato
ehtnaol	potato		g ethanol/g glucose	0.4623
ehtnaol	potato			0.4455
ehtnaol	potato		avrg	0.4539
ehtnaol	potato		glucose in potato	15.6118
ehtnaol	potato		yield g/g potato	0.0708618
ehtnaol	potato
ehtnaol	potato	ref 2	https://www.sciencedirect.com/science/article/pii/S0016236116303623?via%3Dihub#t0015
ehtnaol	potato		Ethanol production in biofilm reactors from potato waste hydrolysate and optimization of growth parameters for Saccharomyces cerevisiae
ehtnaol	potato		Table 3. Kinetic parameters of ethanol fermentation in biofilm reactors under statistically optimized conditions.
ehtnaol	potato		Parameter	Value
ehtnaol	potato		Ethanol produced (g/L)	37.05 ± 0.56
ehtnaol	potato		Glucose consumed (g/L)	80.57 ± 1.2
ehtnaol	potato		Production rate (g/L/h)	2.31 ± 0.89
ehtnaol	potato		Consumption rate (g/L/h)	−5.77 ± 0.96
ehtnaol	potato		Yield (product/subs)	0.4599
ehtnaol	potato		Theoretical yield	0.9208
ehtnaol	potato
ehtnaol	potato		Yield (product/subs)	0.4599
ehtnaol	potato		glucose in potato	15.6118
ehtnaol	potato		yield g/g potato	0.0717985
ehtnaol	potato
ehtnaol	potato	ref 3	https://link.springer.com/article/10.1007/s10068-013-0099-4
ehtnaol	potato		Production of a high concentration of ethanol from potato tuber by high gravity fermentation
ehtnaol	potato		The theoretical yield of 0.511 g of ethanol is produced from 1 g of glucose.
ehtnaol	potato		91.0% of theoretical yield
ehtnaol	potato
ehtnaol	potato		yield g/g glucose	0.46501
ehtnaol	potato		glucose in potato	15.6118
ehtnaol	potato		yield g/g potato	0.0725962
ehtnaol	potato
ehtnaol	potato	ref 4	https://www.mdpi.com/1422-0067/16/10/24490
ehtnaol	potato		Enhanced Bio-Ethanol Production from Industrial Potato Waste by Statistical Medium Optimization
ehtnaol	potato		These conditions reveal 0.44 g ethanol/g glucose, which is equal 86.7% of the theoretical yield.
ehtnaol	potato
ehtnaol	potato		yield g/g glucose	0.44
ehtnaol	potato		glucose in potato	15.6118
ehtnaol	potato		yield g/g potato	0.0686917
ehtnaol	potato
ehtnaol	potato	ref 5	https://www.sciencedirect.com/science/article/pii/S0961953409000233?via%3Dihub#sec2
ehtnaol	potato		Simultaneous saccharification and fermentation (SSF) of very high gravity (VHG) potato mash for the production of ethanol
ehtnaol	potato		The theoretical yield of 0.511 g of ethanol is produced from 1 g of glucose.
ehtnaol	potato		The optimal condition was corresponded to the predicted ethanol yield of 17.4% (v/v), which was 94% of theoretical yield.
ehtnaol	potato		At the optimal fermentation time (61.5 h), ethanol yield was 16.61% (v/v), which was 89.7% of the theoretical yield.
ehtnaol	potato
ehtnaol	potato		yield g/g glucose	0.48034
ehtnaol	potato		yield g/g glucose	0.458367
ehtnaol	potato		avrg	0.469353
ehtnaol	potato		glucose in potato	15.6118
ehtnaol	potato		yield g/g potato	0.0732743
ehtnaol	potato
HMF	potato	ref 1	https://link.springer.com/article/10.1007/s10570-021-03764-3
HMF	potato		Lignocellulosic biomass and carbohydrates as feed-stock for scalable production of 5-hydroxymethylfurfural
HMF	potato		Table 3 One-gram scale synthesis of 5-HMF from carbohydrates and biomass
HMF	potato			5-HMF yield b (g/kg)
HMF	potato		Raw potato	280
HMF	potato		Raw potato paste	270
HMF	potato		bYields were calculated with respect to raw biomass weight
HMF	potato
HMF	potato		avrg	0.275
HMF	potato
succinic acid	potato	ref 1	https://www.sciencedirect.com/science/article/pii/S0961953423003331?via%3Dihub#tbl6
succinic acid	potato		Succinic acid production by Actinobacillus succinogenes using acid and enzymatic hydrolysates of potato and beer wastes and repeated batch operation
succinic acid	potato		able 4. Summary of published studies on the production of succinic acid with A. succinogenes depending on the type of operation and the carbon and nitrogen sources.
succinic acid	potato		Type of operation	Cell state	Carbon source	Nitrogen source	YP (gP‧gS−1)	PP (gP‧L−1‧h−1)	CP (gP‧L−1)	Reference
succinic acid	potato		Batch	Growing	Glucose	Yeast extract	0.63	0.13	20.8	[40]
succinic acid	potato			Free
succinic acid	potato		Batch	Growing	Fresh Cassava Root	Yeast extract	1.51	3.22	151	[39]
succinic acid	potato			Free
succinic acid	potato		Batch	Growing	Oil palm trunk	Yeast extract	0.47	0.18	10.6	[41]
succinic acid	potato			Free
succinic acid	potato		Batch	Resting	Xylose	None	0.43	0.18	8.51	[35]
succinic acid	potato			Free
succinic acid	potato		Batch	Growing	Grape Must	Yeast extract	0.67	0.45	43.2	[42]
succinic acid	potato			Free
succinic acid	potato		Batch	Growing	Napier grass	Yeast extract	0.58	0.79	17.5	[43]
succinic acid	potato			Free
succinic acid	potato		Repeated batch	Growing	Glucose	Yeast extract	0.49a	∼0.38a	∼30a	[26]
succinic acid	potato			Immobilized
succinic acid	potato		Repeated batch	Growing	Tequilana agave bagasse	Yeast extract	0.39a	1.10a	∼6.72a	[36]
succinic acid	potato			Immobilized
succinic acid	potato		Continuous cell recycling reactor	Growing Free	Glucose	Yeast extract, Corn steep liquor	0.88	3.86	47.7	[37]
succinic acid	potato		Continuous fluidized bed	Growing	Glucose	Yeast extract	0.76	35.6	31	[26]
succinic acid	potato			Immobilized
succinic acid	potato		Continuous	Growing	Glucose	Yeast extract, Corn steep liquor	0.68	3.4	29.4	[38]
succinic acid	potato			Immobilized
succinic acid	potato		Fed-batch	Growing	Citrus peel waste	Corn steep liquor, vitamins	0.73	0.45	22.4	[44]
succinic acid	potato			Free
succinic acid	potato		Fed-batch	Growing	Olive pits	Yeast extract	0.27	0.5	33.7	[23]
succinic acid	potato			Free
succinic acid	potato		Fed-batch	Growing	Grape pomace and stalks	Wine lees	0.64	0.79	37.2	[22]
succinic acid	potato			Free
succinic acid	potato		Repeated batch	Free	Glucose	Yeast extract	0.62a	2.32a	24.7a	This study
succinic acid	potato		Repeated batch	Free	DPPH	Yeast extract	0.76a	2.03a	28.8a	This study
succinic acid	potato		Repeated batch	Free	Glucose	SBYH	0.78a	1.32a	31.5a	This study
succinic acid	potato		Repeated batch	Free	DPPH	SBYH	0.84a	1.19a	33.6a	This study
succinic acid	potato
succinic acid	potato		DPPH (Discarded Potato Pieces Hydrolysate)
succinic acid	potato		YP is the yield of product with respect to the initial amount of substrate (S)
succinic acid	potato		yield g/g glucose	0.76
succinic acid	potato			0.84
succinic acid	potato		avrg	0.8
succinic acid	potato		glucose in potato	15.6118
succinic acid	potato		yield g/g potato	0.124894
lactic acid	potato	ref 1	http://jase.tku.edu.tw/articles/jase-201306-16-2-12
lactic acid	potato		Optically pure L-lactic acid production directly from leftover bits and pieces of potato starch using an amylolytic pellet-form complex Rhizopus oryzae ASC081
lactic acid	potato		A condition, LBPPS concentration 140 g/L, pH 5.2, temperature 32 °C, inoculum size 15%, phytic acid addition 0.05 g/L and bitter salt addition 0.5 g/L, was favourable for the optically pure L-(+)-lactic acid production, resulting in the optically pure L-(+)-lactic acid yield of 0.12 g / 1.0 g LBPPS.
lactic acid	potato		leftover bits and pieces of potato starch (LBPPS)
lactic acid	potato		yield g/g raw material	0.12
lactic acid	potato
lactic acid	potato	ref 2	https://www.sciencedirect.com/science/article/pii/S0960852421004661?via%3Dihub
lactic acid	potato		Kinetic modeling of hydrogen and L-lactic acid production by Thermotoga neapolitana via capnophilic lactic fermentation of starch
lactic acid	potato		In the presence of CO2, L-lactic acid production by the acetyl-CoA carboxylation was significantly higher for the potato starch (0.88 ± 0.39 mol lactic acid/mol glucose eq.) than wheat starch (0.33 ± 0.11 mol lactic acid/mol glucose eq.).
lactic acid	potato		Yield (potato starch) ( mol lactic acid/mol glucose eq.)	0.88 ± 0.39
lactic acid	potato			0.88
lactic acid	potato		yield g/g glucose	0.44
lactic acid	potato		glucose in potato	15.6118
lactic acid	potato		yield g/g potato	0.0686917
lactic acid	potato
lactic acid	potato
lactic acid	potato	ref 3	https://www.sciencedirect.com/science/article/pii/S138917230900200X?via%3Dihub
lactic acid	potato		Enhancement of l(+)-lactic acid production using acid-adapted precultures of Rhizopus arrhizus in a bubble column reactor
lactic acid	potato		88 g/L lactic acid was produced from waste potato starch (equivalent to 100 g/L glucose) in a bubble column reactor using appropriate acid-adapted precultures of Rhizopus arrhizus.
lactic acid	potato
lactic acid	potato		yield g LA/g glucose	0.88
lactic acid	potato		glucose in potato	15.6118
lactic acid	potato		yield g/g potato	0.137383
lactic acid	potato
lactic acid	potato	ref 4	Direct fermentation of potato starch wastewater to lactic acid by Rhizopus oryzae and Rhizopus arrhizus
lactic acid	potato		https://link.springer.com/article/10.1007/s00449-005-0398-0
lactic acid	potato		A growth condition with starch concentration 20 g/L at pH 6 and 30°C was favorable for both starch saccharification and lactic acid fermentation, resulting in lactic acid yield of 0.87-0.97 g/g starch associated with 1.5-2 g/L fungal biomass produced in 36 hr fermentation.
lactic acid	potato
lactic acid	potato		yield g/g starch	0.87
lactic acid	potato			0.97
lactic acid	potato		avrg	0.92
lactic acid	potato		starch in potato	14.0506
lactic acid	potato		yield g/g potato	0.129265
lactic acid	potato
lactic acid	potato	ref 5	https://analyticalsciencejournals.onlinelibrary.wiley.com/doi/10.1002/elsc.200700002
lactic acid	potato		Effects of cultivation parameters on the morphology of Rhizopus arrhizus and the lactic acid production in a bubble column reactor
lactic acid	potato		Optimal cultivation conditions at pH 6.0 and an aeration rate of 0.4 vvm resulted in the formation of freely dispersed small pellets and 103.8 g/L lactic acid with a yield of 87 % from 120 g/L liquefied potato starch in 48 h.
lactic acid	potato
lactic acid	potato		g/L lactic acid	103.8
lactic acid	potato		g/L liquefied potato starch	120
lactic acid	potato		yield g/g starch	0.865
lactic acid	potato		starch in potato	14.0506
lactic acid	potato		yield g/g potato	0.121538

## Sheet: sweet potato
ethanol	sweet potato	ref 1	https://www.sciencedirect.com/science/article/pii/S0959652611005683?via%3Dihub#tbl6
			Simultaneous hydrogen and ethanol production from sweet potato via dark fermentation
			Table 6. Energy production efficiency at various experimental conditions.
			Runa	Hydrogen production yield (mmol H2/g sweet potato)	Ethanol production yield (mmol EtOH/g sweet potato)	Energy production yield (J/g sweet potato)		TEP (J/g sweet potato)
						Hydrogen	Ethanol
			1	1.15	0.42	329	574	902
			2	0.81	1.02	231	1393	1625
			3	1.07	0.63	306	861	1166
			a
			Run 1 (optimal condition for hydrogen production): sweet potato 50 g COD/L, sewage sludge seed, temperature 37 °C and pH 7.0; Run 2 (optimal condition for ethanol production): sweet potato 50 g COD/L, sewage sludge seed, temperature 37 °C and pH 8.5; Run 3 (optimal condition for hydrogen and ethanol production using indigenous bacteria): sweet potato 50 g COD/L, indigenous bacteria seed, temperat…
			avrg Ethanol production yield (mmol EtOH/g sweet potato)	0.69
			avrg Ethanol production yield (g EtOH/g sweet potato)	0.03174
		ref 2	https://iubmb.onlinelibrary.wiley.com/doi/10.1002/bab.1190
			The use of plant cell wall–degrading enzymes from newly isolated Penicillium ochrochloron Biourge for viscosity reduction in ethanol production with fresh sweet potato tubers as feedstock
							AVRG
			Total sugar, initial (g/kg)	179.6	179.6	179.6	179.6
			Total sugar, final (g/kg)	19.58	23.23	21.35	21.3867
			Ethanol, final (g/kg)	84.96	80.83	76.63	80.8067
			sugar used (g/kg)				158.213
			yield ethanol/ sugar( g/g)				0.510745
			sugar in sweet potato				0.2165
			yield ethanol/ sweet potato ( g/g)				0.110576
		ref 3	https://link.springer.com/article/10.1007/s42452-021-04369-y
			The potential of sweet potato biorefinery and development of alternative uses
			Table 1 Fermentation parameters using S. cerevisiae strains with initial inoculum sizes of 107 or 108 cells/mL at different fermentation times
			From: The potential of sweet potato biorefinery and development of alternative uses
			Strains	UFC (cells/mL)	107				108
				Time (h)	6	12	18	24	6	12	18	24									avrg
			LPB1-93	IRSa (g/L)	79.7	79.7	79.7	79.7	78.6	78.6	78.6	78.6									79.15
				CSb (%)	5	35.6	67.8	94	56.7	93.2	96.4	97.2									68.2375
				PEc (g/L)	1.2 ± 0.35	13.1 ± 0.71	25.9 ± 0.28	31.0 ± 1.27	22.6 ± 0.71	30.8 ± 0.49	38.6 ± 1.41	38.6 ± 1.41	1.2	13.1	25.9	31	22.6	30.8	38.6	38.6	25.225
				Yd (%)	63.3	88.4	96.1	94.7	99.4	83.2	98.9	98.3
				Pe (L/ha/year)	5094	10161	10578	9136	11196	9320	11292	11203
			CA-11	IRSa (g/L)	74.4	74.4	74.4	74.4	64.1	64.1	64.1	64.1									69.25
				CSb (%)	1.9	51.6	76.2	80.1	67.2	68.8	68.8	82.6									62.15
				PEc (g/L)	2.3 ± 0.14	18.2 ± 0.28	27.9 ± 0.07	30.9 ± 0.7	19.6 ± 0.42	21.4 ± 0.28	18.8 ± 0.07	17.2 ± 0.78	2.3	18.2	27.9	30.9	19.6	21.4	18.8	17.2	19.5375
				Yd (%)	92.6	77.8	90.6	94.6	89.2	95	84.1	66.8
				Pe (L/ha/year)	10657	10434	10872	11435	10038	10712	9410	7164
			ATCC-26602	IRSa (g/L)	76.8	76.8	76.8	76.8	77.8	77.8	77.8	77.8									77.3
				CSb (%)	2.67	31.7	60.7	79.5	55.2	77	77.1	77.9									57.7212
				PEc (g/L)	1.6 ± 0	14.6 ± 1.06	23.3 ± 0.71	27.5 ± 0.78	21.8 ± 0.07	26.8 ± 0.35	27.8 ± 0.14	27.8 ± 0.14	14.6	23.3	27.5	21.8	21.8	26.8	27.8	27.8	23.5143
				Yd (%)	23.1	97.6	95.5	90.1	99.4	88	90	89.3
				Pe (L/ha/year)	2154	13236	11002	9943	11191	9876	10228	10127
			aInitial reducing sugar; bConsumed sugar; cProduced ethanol; dEthanol yield; eEthanol productivity
							avrg
			consumed sugar g/L	54.01	43.0389	44.6185	47.2225
			ethanol g/L	25.225	19.5375	23.5143	22.7589
			yield ethanol /sugar				0.481951
			sugar in sweet potato				0.2165
			yield ethanol/ sweet potato ( g/g)				0.104342
		ref 4	https://www.sciencedirect.com/science/article/abs/pii/S0960852412017099?via%3Dihub
			Starch saccharification and fermentation of uncooked sweet potato roots for fuel ethanol production
			The ethanol fermentation was carried out by Zymomonas mobilis, and 14.4 g of ethanol (87.2% of the theoretical yield) was produced from 100 g of fresh sweet potato storage roots.
			ethanol	14.4
			fresh sweet potato storage roots	100
			yield ethanol / sweet potato	0.144
			theoretical yield %	0.872
			theoretical yield ethanol / sweet potato g/g	0.165138
		ref 5	https://www.scientific.net/AMR.236-238.59
			Very high gravity fermentation using sweet potato for fuel ethanol productio
					55.59	73.24	87.08	90.16	77.81
			avrg Yield [theoretical production %]	76.776
			theoretical yield ethanol / sweet potato g/g	0.165138
			yield ethanol / sweet potato g/g	0.126786
	sweet potato pulp	theoretical	C6H12O6 = 2 C2H5OH + 2 CO2
			180	46
			ethanol g/ g sugar	0.51143
			sugar in sweet potato %	20.7017
			ethanol /sweet potato g/g	0.105875
furfural	sweet potato	theoretical	https://ift.co.za/media/mediafiles/archive/SAIChE%20Congress%202003%20Arnold%20and%20Buzzard%20paper.pdf
			A NOVEL PROCESS FOR FURFURAL PRODUCTION
			𝒀_(𝒇𝒖𝒓𝒇𝒖𝒓𝒂𝒍/𝒙𝒚𝒍𝒐𝒔𝒆 )	0.7272
			xylose content	0.00277062
			Y furfural / biomass	0.0020148
furfural	sweet potato pulp	theoretical	https://ift.co.za/media/mediafiles/archive/SAIChE%20Congress%202003%20Arnold%20and%20Buzzard%20paper.pdf
			A NOVEL PROCESS FOR FURFURAL PRODUCTION
			𝒀_(𝒇𝒖𝒓𝒇𝒖𝒓𝒂𝒍/𝒙𝒚𝒍𝒐𝒔𝒆 )	0.7272
			xylose content	0.00399837
			Y furfural / biomass	0.00290761
HMF	sweet potato	theoretical	HMF formation reactions (i.e., glucan hydrolysis, glucose isomerization, and fructose dehydration)
			C6H12O6 (Fructose) → C5H4O2CHO (Furfural) + 2H2O.
			180	126
			theoretical yield g/g fructose+glucose	0.7
			fructose+glucose in sweet potato pulp %	21.3717
			theoretical yield g/ g sweet potato pulp	0.149602
	sweet potato pulp	theoretical	HMF formation reactions (i.e., glucan hydrolysis, glucose isomerization, and fructose dehydration)
			C6H12O6 (Fructose) → C5H4O2CHO (Furfural) + 2H2O.
			180	126
			theoretical yield g/g fructose+glucose	0.7
			fructose+glucose in sweet potato pulp %	20.3019
			theoretical yield g/ g sweet potato pulp	0.142113
FDCA	sweet potato	theoretical	https://www.researchgate.net/figure/Theoretical-and-Overall-Yield-for-the-Conversion-of-Pure-Sugars-to-Ethylene-via-Ethanol_tbl6_259752935
			Chemocatalytic Processes for the Production of Bio-Based Chemicals from Carbohydrates
			theoretical yield FDCA from sugar g/g	0.867
			fru+glu in sweet potato %	21.3717
			theoretical yield FDCA from sweet potato g/g	0.185293
FDCA	sweet potato pulp	theoretical	https://www.researchgate.net/figure/Theoretical-and-Overall-Yield-for-the-Conversion-of-Pure-Sugars-to-Ethylene-via-Ethanol_tbl6_259752935
			Chemocatalytic Processes for the Production of Bio-Based Chemicals from Carbohydrates
			theoretical yield FDCA from sugar g/g	0.867
			fru+glu in sweet potato pulp %	20.3019
			theoretical yield FDCA from sweet potato pulp g/g	0.176017
Isoprene	sweet potato	theoretical	glucose insweet potato	18.8312
			yield (isoprene/sweet potato)	0.0320131
	sweet potato pulp	theoretical	glucose in sweet potato pulp	20.3019
			yield (isoprene/sweet potato pulp)	0.0345131
succinic acid	sweet potato	theoretical	yield g/g sugar	0.667143
			glu+fru+xyl in sweet potato	21.6488
			succinate yield g/g sweet potato	0.144428
	sweet potato pulp	theoretical	yield g/g sugar	0.667143
			glu+fru+xyl in sweet potato pulp	20.7017
			succinate yield g/g sweet potato pulp	0.13811
3-HP	sweet potato	theoretical	yield g/g sugar	0.2365
			glucose in sweet potato	18.8312
			yield (3-HP/sweet potato)	0.0445358
	sweet potato pulp	theoretical	yield g/g sugar	0.2365
			glucose in sweet potato pulp	20.3019
			yield (3-HP/sweet potato pulp)	0.0480139
levulinic acid	sweet potato	theoretical	Theoretical yield (g/g hexos)	0.521033
			glu+fru potato pulp (g/100g)	21.3717
			Theoretical yield (g/g sweet potato )	0.111354
	sweet potato pulp	theoretical	Theoretical yield (g/g hexos)	0.521033
			glu+fru potato pulp (g/100g)	20.3019
			Theoretical yield (g/g sweet potato pulp)	0.105779
lactic acid	sweet potato	ref 1	https://ifst.onlinelibrary.wiley.com/doi/epdf/10.1111/ijfs.12347
			Lactic acid production using waste generated from sweet potato processing
			The lactic acid-toglucose ratio (YLA/total = 0.30) observed in this work
			This represents 40% of the theoretical molar yield (with 30 g glucose available in the wastederived media) based on the molar conversion ratio for L. rhamnosus (1.67 mol lactic acid 1 mol_x0001_1 glucose) determined by Berry et al. (1999).
			theoretical yield mol LA /mol glucose	1.67
			practical yield (40% of the theoretical molar yield )	0.668
			yield g LA/g glucose	0.334
			glucose in sweet potato	18.8312
			yield g LA/g sweet potato	0.0628962
		ref 2	https://www.sciencedirect.com/science/article/pii/S1369703X13002738?via%3Dihub#tbl0015
			D- and l-lactic acid production from fresh sweet potato through simultaneous saccharification and fermentation
			Table 3. Comparison of lactic acid production from starchy materials, based on the results reported in the literature and those of this study.
			Carbon source	Nitrogen (g L−1)	Microorganism	Process	Lactic acid			References
			Empty Cell	Empty Cell	Empty Cell	Empty Cell	Conc. (g L−1)	Productivity (g L−1 h−1)	Yield (g g−1)c	Empty Cell
			Cassava powder	5 g YE, 5 g NH4Cl	L. rhamnosus CASL	Batch-SSF	175.4a	1.83	0.64	[9]
			Potato starch	5 g YE, 5 g Ure	L. delbrueckii	Batch-SSF	189a	1.89	0.76	[12]
			Sweet potato flour	10 g Pep, 5 g YE, 10 g BE	L. plantarum MTCC 1407	Batch-SSF	23.86a	0.2	0.24	[15]
			Sweet potato starch	10 g BE, 5 g YE	L. amylophylus BRRC 14055	Fed-batch-SSF	43.7a	0.75d	0.76	[16]
			Cassava bagasse	7.5 g YE, 3 g NH4Cl	L. casei and L. delbrueckii	Batch-SSF	81a	1.35	0.54	[20]
			Starch	8 g RL, 10 g BYC	L. amylophilus GV6	Batch-SSF	13.5a	0.28	0.89	[26]
			Raw corn starch	5 g pep, 5 g BE, 5 g YE	S. bovis 148	Batch-SSF	14.7a		0.74	[29]
			Raw starch	10 g Pep, 5 g YE, 10 g BE	L. manihotivorans LMG 18010T	Batch-SSF	12.6a	0.5	0.67e	[30]
			Fresh cassava roots	20 g Pep	S. bovis JCM 5802	Batch-SSF	43.3a	3.29	0.87	[31]
			Sago starch	10 g Pep, 8 g BE, 4 g YE	E. faecium No. 78	Batch-SSF	16.6a	1.11	0.83	[32]
			Raw corn starch	10 g Pep, 5 g YE	L. plantarum NCIMB 8826 ldhL1::amyA	Batch-SSF	73.2b	1.53	0.73	[33]
			Cassava bagasse	5 g YE	L. casei NCIMB 3254	Batch-SSF	83.8a	1.36	54	[34]
			Corn starch	1 g YE, 30 g CSL	E. faecalis RKY1	Batch-SHF	129.9a	1.5	1.04	[35]
			Tapioca starch				126.7a	1.5	1.01
			Potato starch				123.3a	1.7	0.99
			Wheat starch				123.2a	1.4	0.99
			Barley starch	10 g YE, 10 g Pep	L. casei NRRL B-441	Batch-SSF	162a	3.45	0.95	[36]
			Wheat flour	5 g YE	L. delbrueckii ssp. delbrueckii ATCC 9649	Batch-SHF	109a	1.09	0.91f	[37]
			Fresh sweet potato	3 g YE, 5 g Pep	L. paracasei LA104	Batch-SSF	122.91a	3.41	0.9	This study
							153.38a	3.83	0.91
							198.32a	3.81	0.9
				7 g YE, 3 g Pep	L. coryniformis ATCC 25600		122.49b	2.55	0.9
							151.59b	2.92	0.9
							186.40b	3.11	0.85
			S, Streptococcus; L, Lactobacillus; E, Enterococcus; SSF, simultaneous saccharification and fermentation; SHF, separate hydrolysis and fermentation; Pep, peptone; YE, yeast extract, BE, beef extract, RL, red lentil; BYC, Baker's yeast cell; CSL, corn steep liquor.
			a
			l-Lactic acid.
			b
			d-Lactic acid.
			c
			Lactic acid (g) per initial material (g).
			d
			Maximum productivity.
			e
			Lactic acid (g) per glucose consumed (g).
			f
			Lactic acid (g) per initial glucose (g).
				Yield (g g−1)c
				0.9
				0.91
				0.9
				0.9
				0.9
				0.85
			avrg	0.893333
			glucose in sweet potato %	18.8312
			yield g LA/g sweet potato	0.168225
		ref 3	https://link.springer.com/article/10.1007/s12010-009-8884-5
			Production of Lactic Acid from Raw Sweet Potato Powders by Rhizopus Oryzae Immobilized in Sodium Alginate Capsules
			The yield in this study was calculated according to the lactic acid production per gram of starch introduced (the starch content was 57% per gram of dry potato powders).
			The corresponding yields were 47% and 73% (total lactic acid produced/total starch introduced) in the operation with free cells and immobilized cells, respectively.
			avrg yield(total lactic acid produced/total starch introduced)	0.6
			the starch content per gram of dry potato powders	0.57
			yield(total lactic acid produced/dry potato)	0.342
			DM in sweet potato	0.3
			yield(total lactic acid produced/sweet potato)	0.1026
	sweet potato pulp	theoretical	https://link.springer.com/article/10.1007/s10570-019-02571-1
			Bioprocessing of rice husk into monosaccharides and the fermentative production of bioethanol and lactate
			YLA lactic acid yield expressed as percentage of theoretical lactic acid yield (0.76 g lactic acid per g sugar)
			theoretical yield (g lactic acid per g sugar)	0.76
			sugar from sweet potato pulp g/g	20.7017
			theoretical yield (g lactic acid per g sweet potato pulp)	0.157333
sorbitol	sweet potato	theoretical	https://link.springer.com/article/10.1007/s00253-002-1046-0
			The biotechnological production of sorbitol
			avrg conversion of glucose and fructose %	95.2
			yield g/g glucose and fructose	0.962578
			glu+ fru in sweet potato %	21.3717
			yield g/g sweet potato	0.20572
	sweet potato pulp	theoretical	https://link.springer.com/article/10.1007/s00253-002-1046-0
			The biotechnological production of sorbitol
			avrg conversion of glucose and fructose %	95.2
			yield g/g glucose and fructose	0.962578
			glu+ fru in sweet potato pulp %	20.3019
			yield g/g sweet potato pulp	0.195421
Xylitol	sweet potato	theoretical	https://www.sciencedirect.com/science/article/pii/S0922338X98800263?casa_token=aLqBeV90biIAAAAA:uqYoRDUYXPdbjyYra-122gWl9FVoabLSx-h_EHf6fDpWVOsKLf0qIS6Sd5kzioR63hHTDi8
			Microbial conversion of d-xylose to xylitol
			avrg Yx/s (g xylitol/g xylose)	0.485909
			xylose in sweet potato pulp %	0.277062
			yield (g xylitol / g sweet potato pulp)	0.00134627
Xylitol	sweet potato pulp	theoretical	https://www.sciencedirect.com/science/article/pii/S0922338X98800263?casa_token=aLqBeV90biIAAAAA:uqYoRDUYXPdbjyYra-122gWl9FVoabLSx-h_EHf6fDpWVOsKLf0qIS6Sd5kzioR63hHTDi8
			Microbial conversion of d-xylose to xylitol
			avrg Yx/s (g xylitol/g xylose)	0.485909
			xylose in sweet potato pulp %	0.399837
			yield (g xylitol / g sweet potato pulp)	0.00194284

## Sheet: corn
Chemical	FL
Ethanol	Corn	Ref 1	https://www.mdpi.com/2227-9717/7/9/578#app1-processes-07-00578				Table S1
Ethanol	Corn		Processes | Free Full-Text | Impact of Fractionation Process on the Technical and Economic Viability of Corn Dry Grind Ethanol Process (mdpi.com)
Ethanol	Corn		Process	Ethanol Yield (L/kg dry corn)	Density of ethanol (kg/L)	Yield (g eth/g corn)	Average yield (g/g)		moisture ocntent	30.2
Ethanol	Corn		Dry Grind	0.487	0.79	0.38473	0.360064		yield g/g grain	0.251325
Ethanol	Corn		QG	0.484	0.79	0.38236
Ethanol	Corn		QGQF	0.475	0.79	0.37525
Ethanol	Corn		E1	0.451	0.79	0.35629
Ethanol	Corn		E2	0.467	0.79	0.36893
Ethanol	Corn		DF1	0.395	0.79	0.31205
Ethanol	Corn		DF2	0.452	0.79	0.35708
Ethanol	Corn		DF3	0.444	0.79	0.35076
Ethanol	Corn		DF4	0.447	0.79	0.35313
Ethanol	Corn		MAX	0.487
Ethanol	Corn		MIN	0.395
Ethanol	Corn
Ethanol	Corn	Ref 2	https://www.sciencedirect.com/science/article/pii/S1359511316300010				Table 2
Ethanol	Corn		Effects of hydrodynamic cavitation on dry mill corn ethanol production - ScienceDirect
Ethanol	Corn		Pretreatment	Enzyme dose	Ethanol	UFTG	Lactic acid	Glycerol	Acetic acid	CO2
Ethanol	Corn				%w/w dry corn	%w/w dry corn	%w/w dry corn	%w/w dry corn	%w/w dry corn	%w/w dry corn	Ethanol Yield (%w/w dry corn)	Average yield (g/g)		moisture ocntent	30.2
Ethanol	Corn		Ctrl	0.4	35.00 ± 0.93 a	2.41 ± 0.09 a	0.13 ± 0.02 a	2.52 ± 0.06 abc	0.13 ± 0.02 a	35.79 ± 0.63 ab	35	0.353493		yield g/g grain	0.246738
Ethanol	Corn			0.7	35.10 ± 0.82 a	2.39 ± 0.06 a	0.11 ± 0.00 a	2.54 ± 0.05 abc	0.13 ± 0.01 a	36.05 ± 0.57 ab	35.1
Ethanol	Corn			1	35.21 ± 0.61 a	2.38 ± 0.04 a	0.12 ± 0.01 a	2.55 ± 0.09 abc	0.13 ± 0.01 a	36.16 ± 0.41 ab	35.21
Ethanol	Corn		Cav2A	0.4	34.92 ± 0.35 a	2.24 ± 0.22 a	0.12 ± 0.01 a	2.57 ± 0.06 abc	0.13 ± 0.01 a	35.83 ± 0.54 ab	34.92
Ethanol	Corn			0.7	35.05 ± 0.45 a	2.35 ± 0.04 a	0.11 ± 0.01 a	2.61 ± 0.09 a	0.14 ± 0.01 a	35.96 ± 0.44 ab	35.05
Ethanol	Corn			1	35.14 ± 0.15 a	2.36 ± 0.06 a	0.12 ± 0.01 a	2.61 ± 0.09 a	0.13 ± 0.00 a	36.00 ± 0.61 ab	35.14
Ethanol	Corn		Cav2B	0.4	35.59 ± 0.15 a	2.34 ± 0.02 a	0.10 ± 0.01 a	2.56 ± 0.01 abc	0.14 ± 0.00 a	36.78 ± 0.06 ab	35.59
Ethanol	Corn			0.7	35.74 ± 0.09 a	2.31 ± 0.03 a	0.11 ± 0.00 a	2.56 ± 0.04 abc	0.14 ± 0.01 a	36.86 ± 0.12 ab	35.74
Ethanol	Corn			1	35.85 ± 0.11 a	2.33 ± 0.02 a	0.10 ± 0.01 a	2.58 ± 0.02 ab	0.15 ± 0.00 a	36.96 ± 0.09 ab	35.85
Ethanol	Corn		Cav2C	0.4	35.82 ± 0.26 a	2.22 ± 0.22 a	0.09 ± 0.01 a	2.52 ± 0.02 abc	0.14 ± 0.00 a	37.18 ± 0.11 a	35.82
Ethanol	Corn			0.7	36.12 ± 0.29 a	2.37 ± 0.13 a	0.09 ± 0.02 a	2.55 ± 0.04 abc	0.14 ± 0.00 a	37.09 ± 0.07 ab	36.12
Ethanol	Corn			1	36.13 ± 0.13 a	2.33 ± 0.02 a	0.10 ± 0.01 a	2.56 ± 0.04 abc	0.14 ± 0.00 a	37.22 ± 0.09 a	36.13
Ethanol	Corn		Jet	0.4	34.69 ± 0.49 a	2.05 ± 0.32 a	0.11 ± 0.02 a	2.44 ± 0.05 bc	0.14 ± 0.01 a	35.60 ± 0.96 b	34.69
Ethanol	Corn			0.7	34.85 ± 0.44 a	2.22 ± 0.09 a	0.10 ± 0.02 a	2.42 ± 0.01 c	0.15 ± 0.00 a	35.64 ± 0.83 ab	34.85
Ethanol	Corn			1	35.03 ± 0.49 a	2.24 ± 0.07 a	0.12 ± 0.01 a	2.41 ± 0.01 c	0.14 ± 0.00 a	35.69 ± 0.75 ab	35.03
Ethanol	Corn										MAX	36.13
Ethanol	Corn	Ref 3	https://www.mdpi.com/2311-5637/4/4/87								MIN	34.69
Ethanol	Corn		Soaking in Aqueous Ammonia (SAA) Pretreatment of Whole Corn Kernels for Cellulosic Ethanol Production from the Fiber Fractions
Ethanol	Corn		able 3. Final ethanol concentrations and calculated yields in control experiment and experiments using aqueous ammonia-treated corn.
Ethanol	Corn		Experiment	Final Ethanol Concentration (g/L)	Yield	Yield
Ethanol	Corn				(g Ethanol/kg Treated Corn)	(g Ethanol/kg Raw Corn)
Ethanol	Corn		Corn treated with 2.5 wt% ammonia without cellulase	103.91 ± 1.05	349.9 ± 3.1	340.7 ± 3.0	340.7
Ethanol	Corn		Corn treated with 2.5 wt% ammonia with cellulase	106.31 ± 0.76	359.3 ± 2.2	349.7 ± 2.2	349.7
Ethanol	Corn		Corn treated with 5 wt% ammonia without cellulase	108.79 ± 0.24	369.0 ± 0.7	357.7 ± 0.7	357.7
Ethanol	Corn		Corn treated with 5 wt% ammonia with cellulase	110.83 ± 0.58	377.0 ± 1.7	365.5 ± 1.6	365.5
Ethanol	Corn		Corn treated with 7.5 wt% ammonia without cellulase	112.16 ± 1.40	382.3 ± 4.1	361.7 ± 3.9	361.7
Ethanol	Corn		Corn treated with 7.5 wt% ammonia with cellulase	116.84 ± 0.36	401.0 ± 1.1	379.5 ± 1.0	379.5
Ethanol	Corn		Corn treated with 7.5 wt% ammonia with cellulase plus urea	114.69 ± 1.0	392.4 ± 3.7	371.3 ± 3.5	371.3
Ethanol	Corn		Corn treated with 10 wt% ammonia without cellulase	104.86 ± 0.36	353.6 ± 2.9	334.6 ± 2.8	334.6
Ethanol	Corn		Corn treated with 10 wt% ammonia with cellulase	112.98 ± 0.54	385.6 ± 1.1	364.8 ± 1.0	364.8
Ethanol	Corn		Untreated corn without cellulase	99.84 ± 1.67		334.2 ± 1.6	334.2
Ethanol	Corn		Untreated corn with cellulase	102.64 ± 1.25		345.0 ± 4.9	345
Ethanol	Corn					avrg	354.973
Ethanol	Corn					Yield (g eth/g corn)	0.354973
Ethanol	Corn
Ethanol	Corn
Ethanol	Corn
Ethanol	Corn	Ref 4	Biorefinery of corn cob for microbial lipid and bio-ethanol production: An environmental friendly process
Ethanol	Corn		https://www.sciencedirect.com/science/article/pii/S096085241630462X?via%3Dihub
Ethanol	Corn		131.3 g ethanol and 11.5 g lipid were co-generated from 1 kg raw material.
Ethanol	Corn		Yield g/g corn cob	0.1313
Ethanol	Corn
Ethanol	Corn
Ethanol	Corn
Ethanol	Corn		https://www.sciencedirect.com/science/article/pii/S0016236110000025		this is corn stover so we dont use it to calculate the avrg yield
Ethanol	Corn		Techno-economic comparison of process technologies for biochemical ethanol production from corn stover - ScienceDirect
Ethanol	Corn		Process variations	Total capital investment ($ million)	Total installed equipment cost ($ million)	Ethanol yield (l/Mg)	Ethanol production (million l/year)	Electricity export ($ million/year)	Density of ethanol (kg/L)	Ethanol yield (g/g)	Average yield (g/g)
Ethanol	Corn		Dilute-acid pretreatment (base case)	376	164	289	202	11.7	0.79	0.22831	0.20224
Ethanol	Corn		Dilute-acid pretreatment (high solids)a	389	169	274	192	12.6	0.79	0.21646
Ethanol	Corn		2-Stage dilute-acid pretreatment	391	173	177	124	16.8	0.79	0.13983
Ethanol	Corn		Hot water pretreatment	327	156	211	148	11.3	0.79	0.16669
Ethanol	Corn		AFEX pretreatment	386	167	250	175	16.9	0.79	0.1975
Ethanol	Corn		Pervaporation–distillation	501	209	291	204	13.6	0.79	0.22989
Ethanol	Corn		Separate C5 and C6 fermentation	386	168	300	210	6.5	0.79	0.237
Ethanol	Corn		On-site enzyme production	434	188	256	179	−0.8	0.79	0.20224
Ethanol	Corn				MAX	300
Ethanol	Corn				MIN	177
Ethanol	Corn
Ethanol	Corn	Ref 5	https://biotechnologyforbiofuels.biomedcentral.com/articles/10.1186/s13068-014-0167-x			this is corn stover so we dont use it to calculate the avrg yield
Ethanol	Corn		Simultaneous saccharification and fermentation of steam-exploded corn stover at high glucan loading and high temperature | Biotechnology for Biofuels and Bioproducts | Full Text (biomedcentral.com)
Ethanol	Corn		Process	Ethanol yield (% theoretical)	Max theoretical (g/g glucose)	Ethanol yield (g/g glucose)	Glucan yield (%)	Ethanol yield (g/g glucan)	Glucan %DW	Ethanol yield (g/g corn)	Average yield (g/g)
Ethanol	Corn		SHF	67.6	0.51	0.34476	69.2	0.238574	59	0.140759	0.164048
Ethanol	Corn		SSF 36h prehydrolysis	74.6		0.38046	75.2	0.286106	Table 1; SECS	0.168802
Ethanol	Corn		SSF 36h preh + 2%Tween20	77.2		0.39372	78.6	0.309464		0.182584
Ethanol	Corn		MAX	77.2			Figure 8
Ethanol	Corn		MIN	67.6
Ethanol	Corn
Ethanol	Corn
Ethanol	Corn	Ref 5	Process integration for ethanol production from corn and corn stover as mixed substrates
Ethanol	Corn		https://www.sciencedirect.com/science/article/pii/S0960852419301361?via%3Dihub#t0005
Ethanol	Corn
Ethanol	Corn		Table 1. Total Starch Content, Ethanol Titers, Ethanol Yields, and Starch–Ethanol Conversion Efficiencies of Normal and Waxy Corna
Ethanol	Corn			starch content (%)		ethanol concentration (mL/100 mL)		ethanol yield (g/100 g dry grain)		conversion efficiencyb (%)
Ethanol	Corn		line	2009 crop year	2010 crop year	2009 crop year	2010 crop year	2009 crop year	2010 crop year	2009 crop year	2010 crop year
Ethanol	Corn		Waxy
Ethanol	Corn		5036	71.1 ± 0.3	72.3 ± 0.2	18.7 ± 0.2	18.9 ± 0.1	37.6 ± 0.5	37.9 ± 0.2	93.1	92.5		37.6	37.9
Ethanol	Corn		5037	71.0 ± 0.6	72.8 ± 0.0	18.1 ± 0.1	18.4 ± 0.1	36.3 ± 0.1	37.0 ± 0.3	90.1	89.6		36.3	37
Ethanol	Corn		5038	67.5 ± 0.5	67.3 ± 0.7	18.1 ± 0.1	17.9 ± 0.0	36.3 ± 0.1	35.9 ± 0.1	94.6	94		36.3	35.9
Ethanol	Corn		5039	68.0 ± 0.6	69.2 ± 0.0	17.8 ± 0.4	17.9 ± 0.2	35.7 ± 0.8	36.0 ± 0.4	92.5	91.5		35.7	36
Ethanol	Corn		5040	66.6 ± 0.3	66.4 ± 0.2	17.6 ± 0.1	17.6 ± 0.3	35.4 ± 0.2	35.3 ± 0.6	93.7	93.8		35.4	35.3
Ethanol	Corn		5042	64.1 ± 0.0	65.3 ± 0.1	17.2 ± 0.2	17.4 ± 0.3	34.6 ± 0.3	34.8 ± 0.5	95	94		34.6	34.8
Ethanol	Corn		5043	68.9 ± 0.7	66.7 ± 0.2	18.0 ± 0.3	17.8 ± 0.2	36.2 ± 0.5	35.7 ± 0.4	92.5	94.3		36.2	35.7
Ethanol	Corn		5044	68.1 ± 1.0	66.8 ± 0.4	17.9 ± 0.1	17.8 ± 0.1	35.9 ± 0.1	35.6 ± 0.2	92.8	94		35.9	35.6
Ethanol	Corn
Ethanol	Corn		LSM ± SEMc	68.3b ± 0.6		17.9a ± 0.1		36.0a ± 0.3		93.0a ± 0.3
Ethanol	Corn		Normal
Ethanol	Corn		4701	74.3 ± 0.7	74.1 ± 0.5	18.6 ± 0.2	18.7 ± 0.2	37.2 ± 0.5	37.5 ± 0.4	88.3	89.2		37.2	37.5
Ethanol	Corn		4702	71.5 ± 0.8	70.5 ± 0.4	17.5 ± 0.4	17.5 ± 0.2	35.2 ± 0.8	35.1 ± 0.4	86.8	87.6		35.2	35.1
Ethanol	Corn		4703	68.2 ± 0.5	68.1 ± 0.1	17.1 ± 0.2	17.1 ± 0.6	34.2 ± 0.4	34.3 ± 1.3	88.5	88.8		34.2	34.3
Ethanol	Corn		4704	74.1 ± 0.7	74.1 ± 0.6	18.5 ± 0.3	18.4 ± 0.5	37.2 ± 0.7	37.0 ± 1.1	88.4	87.9		37.2	37
Ethanol	Corn
Ethanol	Corn		LSM ± SEM	71.9a ± 0.9		17.9a ± 0.2		36.0a ± 0.4		88.2b ± 0.5		avrg	35.9958
Ethanol	Corn		a	Values are the mean ± standard deviation of two replicates.
Ethanol	Corn		b	Conversion efficiency (%) = 100 × ethanol yield (w/w)/theoretical yield of ethanol.								min	34.2
Ethanol	Corn		c	Least-squares means (LSM) ± standard errors (SEM). Different letters following the LSM values within the same column indicate statistically different mean values (p < 0.05).								max	37.9
Ethanol	Corn
Ethanol	Corn		yield g/g dry grain	0.359958
Ethanol	Corn
Ethanol	Corn		moisture content of maize grain ranged from 26.25 to 34.15%		https://www.researchgate.net/figure/Average-moisture-content-of-grain-and-corn-cob-cores-at-harvest_tbl1_359924478
Ethanol	Corn
Ethanol	Corn		moisture ocntent	30.2
Ethanol	Corn		yield g/g grain	0.251251
Ethanol	Corn
Ethanol	Corn
Ethanol	Corn
Ethanol	Corn
Ethanol	Corn
Ethanol	Corn
Ethanol	Corn
Ethanol	Corn pericarp	Ref 1	https://elibrary.asabe.org/abstract.asp?aid=27102
Ethanol	Corn pericarp		Evaluation of seven feedstocks for cellulosic ethanol production in the northwestern United States of America
Ethanol	Corn pericarp		Figure 4. Measured final ethanol yields for feedstocks treated with different pretreatments.
Ethanol	Corn pericarp		corn pericarp	0.75% acid	0.31
Ethanol	Corn pericarp		ethanol g/ 100 g dry matter	2.0% aicd	2.68
Ethanol	Corn pericarp			2.0% alkali	0.56
Ethanol	Corn pericarp			1% alkali	3.31
Ethanol	Corn pericarp			avrg	1.715
Ethanol	Corn pericarp		moisture in corn pericarp	0.375
Ethanol	Corn pericarp		ethanol g/ g corn percicarp	0.0107188
Ethanol	Corn germ
Ethanol	Corn germ	Ref 1	https://www.mdpi.com/2227-9717/10/4/661				Figure 3
Ethanol	Corn germ		Processes | Free Full-Text | Coprocessing Corn Germ Meal for Oil Recovery and Ethanol Production: A Process Model for Lipid-Producing Energy Crops (mdpi.com)
Ethanol	Corn germ		Treatment type	Ethanol yield (% w/w germ)	Average yield (g/g)
Ethanol	Corn germ		A	38.9	0.496333
Ethanol	Corn germ		B	60.1
Ethanol	Corn germ		C	49.9
Ethanol	Corn germ		MAX	60.1
Ethanol	Corn germ		MIN	38.9
Ethanol	Corn germ
Furfural	Corn	Ref 1	https://www.sciencedirect.com/science/article/pii/S0960852417313822			Table 2	corn stover
Furfural	Corn		Enhanced furfural production from raw corn stover employing a novel heterogeneous acid catalyst - ScienceDirect
Furfural	Corn		Catalyst	Solvent	Reaction conditions	Substrate	Furfural yield (%)	References	Furfural yield (g/g xylan in corn)	Xylan in corn (%)	Furfural yield (g/g corn)	average
Furfural	Corn		No catalyst	GVL	200 °C, 100 min	Corn stover	Trace	This work		20.5		0.0904637
Furfural	Corn		C-CaCt-700	GVL	200 °C, 100 min	Corn stover	1.9	This work	0.0121602		0.00249284
Furfural	Corn		SC-CaCt-600	GVL	200 °C, 100 min	Corn stover	89.3	This work	0.571528		0.117163
Furfural	Corn		SC-CaCt-700	GVL	200 °C, 100 min	Corn stover	93	This work	0.595209		0.122018
Furfural	Corn		SC-CaCt-800	GVL	200 °C, 100 min	Corn stover	91.6	This work	0.586249		0.120181
Furfural	Corn		The raw corn stover contains 31.6% glucan, 20.5% xylan, 2.1% other glycan, 19.4% acid-insoluble lignin, 3.4% acid-soluble lignin, 9.5% extractive, 8.7% ash, and 4.8% other composition, which was close to reported values
Furfural	Corn					MAX	93
Furfural	Corn					MIN	1.9
Furfural	Corn
Furfural	Corn
Furfural	Corn
Furfural	Corn
Furfural	Corn	Ref 2	https://www.sciencedirect.com/science/article/pii/S0960852416316182			Table 1
Furfural	Corn		Efficient catalytic system for the direct transformation of lignocellulosic biomass to furfural and 5-hydroxymethylfurfural - ScienceDirect
Furfural	Corn		Entry	Feedstock loading (mg)	Furfural yield (%)	5-HMF yield (%)	Furfural yield (g/g xylan in corn)	Xylose in corn (%)	Furfural yield (g/g corn)	average
Furfural	Corn		1	40	62.4	27.1	0.399366	3.93677	0.0157221	0.0119859
Furfural	Corn		2	50	57.6	14.8	0.368645		0.0145127
Furfural	Corn		3	60	50.8	11.4	0.325125		0.0127994
Furfural	Corn		4	70	29	8.5	0.185603		0.00730675
Furfural	Corn		5b	70	22.7	6.8	0.145282		0.00571942
Furfural	Corn		SPTPA converted corncob efficiently and resulted in simultaneously good yields of furan-based compounds (36.6–73.9% furfural yields and 2.3–32.3% 5-HMF yields).		36.6		0.234243		0.00922162
Furfural	Corn		(not in table)		73.9		0.472967		0.0186196
Furfural	Corn			MAX	73.9
Furfural	Corn			MIN	22.7
Furfural	Corn
Furfural	Corn	Ref 3	https://www.sciencedirect.com/science/article/pii/S096085241631639X			Table 2
Furfural	Corn		Catalytic conversion of corncob and corncob pretreatment hydrolysate to furfural in a biphasic system with addition of sodium chloride - ScienceDirect
Furfural	Corn		NaCl, g	Furfural yield, %			Xylose conversion, %	Furfural selectivity, %	Furfural yield
Furfural	Corn			Organic	Aqueous	Total			(g fur/g xylose in corn)	Xylose in corn (%)	Furfural yield (g/g corn)	average
Furfural	Corn		0	36.88 ± 0.81	11.38 ± 1.32	48.26	91.70 ± 1.74	52.63 ± 0.73	0.308864	3.93677	0.0121593	0.0150311
Furfural	Corn		0.1	38.73 ± 0.29	10.99 ± 0.43	49.72	91.64 ± 0.68	54.25 ± 0.46	0.318208		0.0125271
Furfural	Corn		0.4	41.60 ± 0.33	13.48 ± 0.82	55.07	92.38 ± 0.59	61.26 ± 0.63	0.352448		0.0138751
Furfural	Corn		0.8	42.93 ± 0.21	13.84 ± 0.15	56.76	93.29 ± 0.61	56.10 ± 0.71	0.363264		0.0143009
Furfural	Corn		1.2	49.24 ± 0.18	11.75 ± 0.94	60.99	94.41 ± 0.96	64.60 ± 0.58	0.390336		0.0153666
Furfural	Corn		1.6	58.60 ± 0.20	12.59 ± 1.29	71.2	95.84 ± 0.98	74.29 ± 0.46	0.45568		0.0179391
Furfural	Corn		2	57.74 ± 0.91	11.63 ± 0.34	69.37	94.71 ± 0.60	67.47 ± 2.55	0.443968		0.017478
Furfural	Corn		2.4	55.51 ± 0.54	11.70 ± 0.62	67.21	94.08 ± 0.47	71.44 ± 0.60	0.430144		0.0169338
Furfural	Corn		3.2	55.20 ± 0.42	9.55 ± 0.58	64.74	94.45 ± 0.52	68.55 ± 0.67	0.414336		0.0163114
Furfural	Corn		4	53.79 ± 0.36	8.66 ± 0.87	62.44	93.62 ± 0.39	66.70 ± 0.43	0.399616		0.015732
Furfural	Corn		5	52.39 ± 0.27	6.20 ± 0.39	58.58	92.57 ± 0.68	63.29 ± 0.40	0.374912		0.0147594
Furfural	Corn		6	46.24 ± 1.19	5.33 ± 1.24	51.56	92.04 ± 1.81	56.03 ± 0.92	0.329984		0.0129907
Furfural	Corn				MAX	71.2
Furfural	Corn				MIN	48.26
Furfural	Corn
Furfural	Corn	Ref 4	https://www.sciencedirect.com/science/article/pii/S0960852413016866			Table 1
Furfural	Corn		Production of furfural from xylose, xylan and corncob in gamma-valerolactone using FeCl3·6H2O as catalyst - ScienceDirect
Furfural	Corn		Entry	Temperature (K)	Time (min)	Yield (%)
Furfural	Corn					Furfural	5-HMF	furfural yield (%)	Furfural yield (g/g xylan in corn)	Xylan in corn (%)	Furfural yield (g/g corn)	average
Furfural	Corn		1	443	50	55.6 ± 0.8	2.5 ± 0.3	55.6	0.355845	3.46436	0.0729483	0.0893672
Furfural	Corn		2	443	100	66.8 ± 0.4	3.4 ± 0.2	66.8	0.427526		0.0876429
Furfural	Corn		3	443	130	60.6 ± 0.4	2.4 ± 0.2	60.6	0.387846		0.0795084
Furfural	Corn		4	458	60	66.2 ± 0.2	3.0 ± 0.2	66.2	0.423686		0.0868557
Furfural	Corn		5	458	80	71.2 ± 0.5	5.9 ± 0.2	71.2	0.455687		0.0934158
Furfural	Corn		6	458	100	79.6 ± 0.3	3.9 ± 0.1	79.6	0.509447		0.104437
Furfural	Corn		7	458	120	76.8 ± 0.3	3.2 ± 0.1	76.8	0.491527		0.100763
Furfural	Corn						MAX	79.6
Furfural	Corn						MIN	55.6
Furfural	Corn
Furfural	Corn	Ref 5	https://www.sciencedirect.com/science/article/pii/S0959652620354561
Furfural	Corn		Carbonized core-shell diatomite for efficient catalytic furfural production from corn cob - ScienceDirect
Furfural	Corn		Entry	Catalyst	Solvent	Furfural yield (%)	Xylose conversion (%)	Furfural selectivity (%)	furfural yield (%)	Furfural yield (g/g xylan in corn)	Xylan in corn (%)	Furfural yield (g/g corn)	average
Furfural	Corn		1	–	H2O	45.6 ± 0.8	79.0 ± 1.4	57.7 ± 1.0	45.6	0.291844	3.46436	0.0598281	0.0644201
Furfural	Corn		2	DM	H2O	51.2 ± 1.9	98.2 ± 1.7	52.1 ± 1.7	51.2	0.327685		0.0671754
Furfural	Corn		3	DMSn	H2O	53.8 ± 1.0	95.6 ± 2.2	56.3 ± 2.2	53.8	0.344325		0.0705866
Furfural	Corn		4	CX-DMSn	H2O	24.0 ± 1.0	95.3 ± 2.2	25.2 ± 2.2	24	0.153602		0.0314885
Furfural	Corn		5	SO42−/CX-DM	H2O	44.9 ± 1.3	97.3 ± 1.5	46.1 ± 1.2	44.9	0.287364		0.0589097
Furfural	Corn		6	SO42−/DMSn	H2O	58.0 ± 1.0	98.0 ± 2.2	59.2 ± 2.2	58	0.371205		0.0760971
Furfural	Corn		7	SO42−/CX-DMSn	H2O	66.2 ± 0.7	95.3 ± 2.0	69.5 ± 0.7	66.2	0.423686		0.0868557
Furfural	Corn							MAX	66.2
Furfural	Corn							MIN	24
Furfural	Corn germ	theoretical	https://ift.co.za/media/mediafiles/archive/SAIChE%20Congress%202003%20Arnold%20and%20Buzzard%20paper.pdf
Furfural	Corn germ		A NOVEL PROCESS FOR FURFURAL PRODUCTION
Furfural	Corn germ
Furfural	Corn germ		𝒀_(𝒇𝒖𝒓𝒇𝒖𝒓𝒂𝒍/𝒙𝒚𝒍𝒐𝒔𝒆 )	0.7272
Furfural	Corn germ		xylose content in corn germ	0
Furfural	Corn germ		Y furfural / biomass	0
Furfural	Corn pericarp
Furfural	Corn pericarp		𝒀_(𝒇𝒖𝒓𝒇𝒖𝒓𝒂𝒍/𝒙𝒚𝒍𝒐𝒔𝒆 )	0.7272
Furfural	Corn pericarp		xylose content in corn pericarp	0.155
Furfural	Corn pericarp		Y furfural / biomass	0.112716
Furfural	Corn pericarp
Furfural	Corn pericarp
HMF	Corn	Ref 1	https://www.sciencedirect.com/science/article/pii/S0960852419318164			Fig 6 & 2
HMF	Corn		Corn stover valorization by one-step formic acid fractionation and formylation for 5-hydroxymethylfurfural and high guaiacyl lignin production - ScienceDirect
HMF	Corn		Process	HMF molar yield (%)	Cellulose in corn (%)	HMF yield (g/g corn)	average
HMF	Corn		1	16.4	8.16667	0.010417	0.0108828
HMF	Corn		2	10.7	(Fig 2)	0.00679648
HMF	Corn		3	10.5		0.00666944
HMF	Corn		4	30.9		0.0196272
HMF	Corn		5	18.7		0.011878
HMF	Corn		6	15.6		0.00990889
HMF	Corn		MAX	30.9
HMF	Corn		MIN	10.5
HMF	Corn
HMF	Corn	Ref 2	https://link.springer.com/article/10.1007/s13399-022-03648-x
HMF	Corn		From corn stover to 5-hydroxymethylfurfural by ball milling-microwave hydrothermal (BM-MHT) | Biomass Conversion and Biorefinery (springer.com)
HMF	Corn		And the highest HMF yield of 3.46 ± 0.02 wt% after 150 min at 214 °C was observed. Furthermor
HMF	Corn		HMF yield (wt%)	3.46
HMF	Corn		HMF yield (g/g)	0.0346
HMF	Corn
HMF	Corn	Ref 3	https://link.springer.com/article/10.1007/s10570-021-03764-3			Table 3
HMF	Corn		Lignocellulosic biomass and carbohydrates as feed-stock for scalable production of 5-hydroxymethylfurfural | Cellulose (springer.com)
HMF	Corn		Entry	Initial Feed	Initial Feed	HMF yield (g/kg) b	Yield (g/g)	average
HMF	Corn		4c	Corn	cob	100	0.1	0.215
HMF	Corn		7	Corn	powder	330	0.33
HMF	Corn		b: Yields were calculated with respect to raw biomass weight
HMF	Corn
HMF	Corn germ	theoretical	HMF formation reactions (i.e., glucan hydrolysis, glucose isomerization, and fructose dehydration)
HMF	Corn germ		C6H12O6 (Fructose) → C5H4O2CHO (Furfural) + 2H2O.
HMF	Corn germ		180	126
HMF	Corn germ		theoretical yield g/g fructose+glucose	0.7
HMF	Corn germ		fructose+glucose in corn germ %	16.6944
HMF	Corn germ		theoretical yield g/ g corn germ	0.116861
HMF	Corn pericarp	theoretical	HMF formation reactions (i.e., glucan hydrolysis, glucose isomerization, and fructose dehydration)
HMF	Corn pericarp		C6H12O6 (Fructose) → C5H4O2CHO (Furfural) + 2H2O.
HMF	Corn pericarp		180	126
HMF	Corn pericarp		theoretical yield g/g fructose+glucose	0.7
HMF	Corn pericarp		fructose+glucose in corn pericarp %	54.2556
HMF	Corn pericarp		theoretical yield g/ g Corn pericarp	0.379789
HMF	Corn pericarp
FDCA	Corn	Ref 1	https://pubs.rsc.org/en/content/articlelanding/2020/ee/d0ee00812e#!
FDCA	Corn		Sustainable development of biorefineries: integrated assessment method for co-production pathways - Energy & Environmental Science (RSC Publishing)
FDCA	Corn
FDCA	Corn
FDCA	Corn
FDCA	Corn
FDCA	Corn
FDCA	Corn
FDCA	Corn					Yield g/g
FDCA	Corn		corn	105	t FDCA / 2000 t Corn Stover	0.0525
FDCA	Corn
FDCA	Corn germ	theoretical	https://www.researchgate.net/figure/Theoretical-and-Overall-Yield-for-the-Conversion-of-Pure-Sugars-to-Ethylene-via-Ethanol_tbl6_259752935
FDCA	Corn germ		Chemocatalytic Processes for the Production of Bio-Based Chemicals from Carbohydrates
FDCA	Corn germ		theoretical yield FDCA from sugar g/g	0.867
FDCA	Corn germ		fru+glu in corn germ %	16.6944
FDCA	Corn germ		theoretical yield FDCA from rice hull g/g	0.144741
FDCA	Corn germ
FDCA	Corn germ
FDCA	Corn germ
FDCA	Corn germ
FDCA	Corn pericarp	theoretical	https://www.researchgate.net/figure/Theoretical-and-Overall-Yield-for-the-Conversion-of-Pure-Sugars-to-Ethylene-via-Ethanol_tbl6_259752935
FDCA	Corn pericarp		Chemocatalytic Processes for the Production of Bio-Based Chemicals from Carbohydrates
FDCA	Corn pericarp		theoretical yield FDCA from sugar g/g	0.867
FDCA	Corn pericarp		fru+glu in corn pericarp %	54.2556
FDCA	Corn pericarp		theoretical yield FDCA from rice hull g/g	0.470396
FDCA	Corn pericarp
FDCA	Corn pericarp
Isoprene	Corn	theoretical	glucose in corn	83.1231
Isoprene	Corn		yield (isoprene/corn)	0.141309
Isoprene	Corn germ
Isoprene	Corn germ	theoretical	glucose in corn germ	16.6944
Isoprene	Corn germ		yield (isoprene/corn g&p)	0.0283806
Isoprene	Corn germ
Isoprene	Corn pericarp	theoretical	glucose in corn pericarp	54.2556
Isoprene	Corn pericarp		yield (isoprene/corn g&p)	0.0922344
Isoprene	Corn pericarp
Succinic Acid	Corn	Ref 1	https://pubmed.ncbi.nlm.nih.gov/24078255/		Table 4 &5
Succinic Acid	Corn		Succinic acid production from corn cob hydrolysates by genetically engineered Corynebacterium glutamicum - PubMed (nih.gov)
Succinic Acid	Corn		Process	Yield (g/g TS)	Total sugar in corn %	Yield g/g corn	average
Succinic Acid	Corn		1	0.79	87.0598	0.687773	0.701315
Succinic Acid	Corn		2	0.84		0.731303
Succinic Acid	Corn		3	0.84		0.731303
Succinic Acid	Corn		4	0.79		0.687773
Succinic Acid	Corn		5	0.81		0.705185
Succinic Acid	Corn		6	0.82		0.713891
Succinic Acid	Corn		7	0.77		0.670361
Succinic Acid	Corn		8	0.8		0.696479
Succinic Acid	Corn		9	0.79		0.687773
Succinic Acid	Corn		MAX	0.84
Succinic Acid	Corn		MIN	0.77
Succinic Acid	Corn
Succinic Acid	Corn	Ref 2	https://www.sciencedirect.com/science/article/pii/S0141022923001540
Succinic Acid	Corn		Comparison of hydrothermolysis and mild-alkaline pretreatment methods on enhancing succinic acid production from hydrolyzed corn fiber - ScienceDirect
Succinic Acid	Corn		When SH-CFH was supplemented only with yeast extract, succinic acid concentration was enhanced to 15.2 g/L with a yield of 0.64 g/g sugars
Succinic Acid	Corn		Yield (g/g TS)	0.64
Succinic Acid	Corn		Total sugar in corn %	87.0598
Succinic Acid	Corn		Yield g/g corn	0.557183
Succinic Acid	Corn
Succinic Acid	Corn	Ref 3	https://www.sciencedirect.com/science/article/pii/S0960852410008278			Table 2	Succinic acid yield as the amount of succinic acid produced from 1 g PCS (dry weight).
Succinic Acid	Corn		Succinic acid production from corn stover by simultaneous saccharification and fermentation using Actinobacillus succinogenes - ScienceDirect
Succinic Acid	Corn		Pretreatment method	SHFa		SSFb
Succinic Acid	Corn		Empty Cell	Initial reducing sugar (g/l)	Succinic acid yield (g/g PCS)c	Succinic acid yield (g/g PCS)c	Average yield (g/g)
Succinic Acid	Corn		Untreated	5.57	0.07	0.06	0.170833
Succinic Acid	Corn		Diluted acid	11.4	0.17	0.11
Succinic Acid	Corn		Diluted alkaline	24.21	0.39	0.26
Succinic Acid	Corn		Aqueous-ammonia soaking	12.2	0.18	0.13
Succinic Acid	Corn		Alkaline peroxide	12.36	0.16	0.13
Succinic Acid	Corn		Steam explosion	19.14	0.2	0.19
Succinic Acid	Corn			MAX	0.39
Succinic Acid	Corn			MIN	0.06
Succinic Acid	Corn
Succinic Acid	Corn	Ref 4	https://www.sciencedirect.com/science/article/pii/S0960852414012966			Table 3
Succinic Acid	Corn		Ionic liquid pretreatment to increase succinic acid production from lignocellulosic biomass - ScienceDirect
Succinic Acid	Corn		Material	Yield (g/g biomassa)	Yield (g/g biomassb)		Yield (g/g)	average
Succinic Acid	Corn		Pinewood extract	0.37 ± 0.04	0.09 ± 0.04		0.09	0.175
Succinic Acid	Corn		Pinewood residue	0.24 ± 0.09	0.09 ± 0.04		0.31
Succinic Acid	Corn		Corn stover	0.09 ± 0.01	0.05 ± 0.01		0.27
Succinic Acid	Corn		SE–corn stover	0.31 ± 0.06	0.15 ± 0.02		0.05
Succinic Acid	Corn		HCW–corn stover	0.27 ± 0.09	0.18 ± 0.02		0.15
Succinic Acid	Corn						0.18
Succinic Acid	Corn					MAX	0.31
Succinic Acid	Corn					MIN	0.05
Succinic Acid	Corn
Succinic Acid	Corn	Ref 5	https://www.sciencedirect.com/science/article/pii/S0960852415016326
Succinic Acid	Corn		Enhanced succinic acid production from corncob hydrolysate by microbial electrolysis cells - ScienceDirect
Succinic Acid	Corn		Carbon sources	Empty Cell	Succinic acid (g/l)	Acetic acid (g/l)	Succinic acid/acetic acid	Succinic acid yield (%)	NADH (μmol/g)	NADH/NAD+	Yield (% TS)	Total sugar in corn %	Yield g/g corn	average
Succinic Acid	Corn		Corncob hydrolysate	E	3.84 ± 0.03	2.85 ± 0.11	1.35 ± 0.04	26 ± 1	42.41 ± 0.20	0.67 ± 0.03	26	87.0598	0.226356	0.200238
Succinic Acid	Corn			NE	2.94 ± 0.17	2.64 ± 0.01	1.12 ± 0.07	20 ± 2	31.71 ± 0.32	0.44 ± 0.01	20		0.17412
Succinic Acid	Corn		The succinic acid yield was defined as the amount of succinic acid produced per g of sugar consumed, and it was expressed as a percentage.
Succinic Acid	Corn
Succinic Acid	Corn germ	theoretical	yield g/g sugar	0.667143
Succinic Acid	Corn germ		glu+fru+xyl in Corn germ	16.6944
Succinic Acid	Corn germ		succinate yield g/g Corn g&p	0.111376
Succinic Acid	Corn pericarp	theoretical	yield g/g sugar	0.667143
Succinic Acid	Corn pericarp		glu+fru+xyl in Corn pericarp	69.7556
Succinic Acid	Corn pericarp		succinate yield g/g Corn pericarp	0.465369
Succinic Acid	Corn pericarp
3HP	Corn	ref 1	https://biotechnologyforbiofuels.biomedcentral.com/articles/10.1186/s13068-023-02288-1#Tab2
3HP	Corn		Metabolic engineering to improve production of 3-hydroxypropionic acid from corn-stover hydrolysate in Aspergillus species
3HP	Corn		Overexpression of pyruvate carboxylase	C-mol 3-HP C-mol−1 glucose	0.09
3HP	Corn				0.12
3HP	Corn		Deletion or overexpression	C-mol 3-HP C-mol−1 glucose	0.22
3HP	Corn		additional β-alanine pathway genes	C-mol 3-HP C-mol−1 glucose	0.48
3HP	Corn		avrg	g 3-HP g−1 glucose	0.143333
3HP	Corn		glucose in corn	83.1231	0.119143
3HP	Corn
3HP	Corn
3HP	Corn germ	theoretical	HMF formation reactions (i.e., glucan hydrolysis, glucose isomerization, and fructose dehydration)
3HP	Corn germ		C6H12O6 (Fructose) → C5H4O2CHO (Furfural) + 2H2O.
3HP	Corn germ		180	126
3HP	Corn germ		theoretical yield g/g fructose+glucose	0.7
3HP	Corn germ		fructose+glucose in corn germ %	16.6944
3HP	Corn germ		theoretical yield g/ g corn germ	0.116861
3HP
3HP	Corn pericarp	theoretical	HMF formation reactions (i.e., glucan hydrolysis, glucose isomerization, and fructose dehydration)
3HP	Corn pericarp		C6H12O6 (Fructose) → C5H4O2CHO (Furfural) + 2H2O.
3HP	Corn pericarp		180	126
3HP	Corn pericarp		theoretical yield g/g fructose+glucose	0.7
3HP	Corn pericarp		fructose+glucose in corn pericarp %	54.2556
3HP	Corn pericarp		theoretical yield g/ g corn pericarp	0.379789
levulinic acid	Corn
levulinic acid	Corn	ref 1	https://www.sciencedirect.com/science/article/pii/S092666901530282X?via%3Dihub#tbl0015
levulinic acid	Corn		Kinetic study of levulinic acid production from corn stalk at relatively high temperature using FeCl3 as catalyst: A simplified model evaluated - ScienceDirect (wur.nl)
levulinic acid	Corn		Table 3. Optimal treatment conditions obtained from the kinetic model.
levulinic acid	Corn		T(°C)	[FeCl3](mol/L)	Time(min)	LA yield(%)
levulinic acid	Corn		220	0.1	36.24	33.63
levulinic acid	Corn			0.3	21.57	41.16
levulinic acid	Corn			0.5	16.85	44.9
levulinic acid	Corn		230	0.1	21.78	35.83
levulinic acid	Corn			0.3	12.63	42.15
levulinic acid	Corn			0.5	9.78	45.39
levulinic acid	Corn		240	0.1	26.92	38.16
levulinic acid	Corn			0.3	7.67	43
levulinic acid	Corn			0.5	4.28	45.45
levulinic acid	Corn				avrg	41.0744
levulinic acid	Corn		yield (g LA / g glucan)	0.294093
levulinic acid	Corn		glucan in corn (%)	78.3538
levulinic acid	Corn		yield (g LA / g corn)	0.230433
levulinic acid	Corn
levulinic acid	Corn	ref 2	Development of bioprocess for corncob-derived levulinic acid production			abnormal value
levulinic acid	Corn		https://www.sciencedirect.com/science/article/pii/S0960852423000548?via%3Dihub
levulinic acid	Corn		Table 1. Experimental design and result of hydrothermal conversion of corncob to LA.
levulinic acid	Corn		Run	X1, Biomass conc.	X2, Time (min)	X3, Temperature (oC)	X4, Catalyst conc. (M)	LA production
levulinic acid	Corn			(g/L)				Yield (%)	Conc. (g/L)
levulinic acid	Corn		1	85	60	150	1	11.3	8.13
levulinic acid	Corn		2	85	60	180	0.5	13.92	10.02
levulinic acid	Corn		3	85	60	180	1.5	14.45	10.41
levulinic acid	Corn		4	120	60	120	1	6.62	1.16
levulinic acid	Corn		5	50	60	150	0.5	2.54	1.83
levulinic acid	Corn		6	85	90	150	0.5	6.62	4.77
levulinic acid	Corn		7	120	60	150	0.5	6.78	4.88
levulinic acid	Corn		8	85	60	120	1.5	1.59	1.15
levulinic acid	Corn		9	50	60	150	1.5	8.35	6.01
levulinic acid	Corn		10	85	30	150	0.5	1.71	1.23
levulinic acid	Corn		11	85	90	150	1.5	14.78	10.64
levulinic acid	Corn		12	85	60	150	1	12.46	8.97
levulinic acid	Corn		13	50	30	150	1	2.1	1.51
levulinic acid	Corn		14	120	30	150	1	6.24	4.49
levulinic acid	Corn		15	50	90	150	1	9.17	6.6
levulinic acid	Corn		16	85	60	150	1	10.52	7.58
levulinic acid	Corn		17	85	90	180	1	15.06	10.84
levulinic acid	Corn		18	50	60	120	1	0.63	0.45
levulinic acid	Corn		19	50	60	180	1	9.08	6.54
levulinic acid	Corn		20	120	90	150	1	16.21	11.67
levulinic acid	Corn		21	85	60	120	0.5	1.34	0.97
levulinic acid	Corn		22	120	60	180	1	19.9	14.47
levulinic acid	Corn		23	85	30	150	1.5	7.83	5.63
levulinic acid	Corn		24	120	60	150	1.5	16.41	11.82
levulinic acid	Corn		25	85	30	120	1	1.01	0.73
levulinic acid	Corn		26	85	90	120	1	2.28	1.64
levulinic acid	Corn		27	85	30	180	1	12.6	9.07
levulinic acid	Corn						avrg	8.57407
levulinic acid	Corn						min	0.63
levulinic acid	Corn						max	19.9
levulinic acid	Corn
levulinic acid	Corn
levulinic acid	Corn
levulinic acid	Corn		yield (g LA / g carbohydrate)	0.0857407
levulinic acid	Corn		carbohydrate in corn (%)	87.0598
levulinic acid	Corn		yield (g LA / g corn)	0.0746457
levulinic acid	Corn
levulinic acid	Corn	ref 3	High concentration levulinic acid production from corn stover
levulinic acid	Corn		https://pubs.rsc.org/en/content/articlelanding/2016/ra/c6ra23768a
levulinic acid	Corn		Fig. 4 Fructose loading effects on fructose conversion, maximum LA yield, and LA loading (reaction conducted at 95 °C and HMF was completely consumed).
levulinic acid	Corn
levulinic acid	Corn
levulinic acid	Corn
levulinic acid	Corn
levulinic acid	Corn
levulinic acid	Corn
levulinic acid	Corn
levulinic acid	Corn
levulinic acid	Corn
levulinic acid	Corn
levulinic acid	Corn
levulinic acid	Corn
levulinic acid	Corn
levulinic acid	Corn
levulinic acid	Corn
levulinic acid	Corn
levulinic acid	Corn
levulinic acid	Corn		yield (mol %)	63.63
levulinic acid	Corn			60
levulinic acid	Corn			55.58
levulinic acid	Corn			36.36
levulinic acid	Corn			22.86
levulinic acid	Corn		avrg	47.686
levulinic acid	Corn		mol weight fru	180
levulinic acid	Corn		mol weight LA	116
levulinic acid	Corn		yield (g LA/ g fructose)	0.30731
levulinic acid	Corn		g fructose / g corn	83.1231
levulinic acid	Corn		yield (g LA/ g corn)	0.255445
levulinic acid	Corn
levulinic acid	Corn	ref 4	Kinetics study of levulinic acid production from corncobs by tin tetrachloride as catalyst
levulinic acid	Corn		https://www.sciencedirect.com/science/article/pii/S0960852418304243?via%3Dihub
levulinic acid	Corn
levulinic acid	Corn		Table 3. Experimental design and analysis results for LA production.
levulinic acid	Corn		Run	CSnCl4	T	t	Concentration g/L						Yield %
levulinic acid	Corn			mM	°C	min	HMF	GLU	XYL	ARA	FA	AA	LA	FF
levulinic acid	Corn		1	60	200	10	0	0.05	0.33	0.14	5.35	1.56	66	28.6
levulinic acid	Corn		2	60	180	30	0.03	0.08	0.37	0.12	5.2	1.57	66	28
levulinic acid	Corn		3	60	180	30	0.01	0.07	0.58	0	5.26	1.6	65.3	27.9
levulinic acid	Corn		4	60	180	30	0.01	0.04	0.4	0.21	5.27	1.57	64.3	25.9
levulinic acid	Corn		5	60	180	30	0.01	0.04	0.34	0.15	5.19	1.56	63.9	26.4
levulinic acid	Corn		6	60	160	10	0.4	3.49	1.14	0.22	1.35	1.71	24.7	52.8
levulinic acid	Corn		7	60	180	30	0.01	0.07	0.35	0.15	5.26	1.53	63.2	25.2
levulinic acid	Corn		8	20	180	50	1.03	1.85	0.39	0	2.43	1.87	31.2	42.2
levulinic acid	Corn		9	100	200	30	0	0.08	0.36	0.11	5.58	1.54	69.1	6.1
levulinic acid	Corn		10	60	200	50	0	0.08	0.36	0.1	4.92	1.53	64.6	0
levulinic acid	Corn		11	100	180	10	0	0.15	0.45	0.15	5.89	1.54	62.9	28.1
levulinic acid	Corn		12	20	160	30	0.26	3.33	1.63	0.29	1.35	1.8	4.4	44.2
levulinic acid	Corn		13	20	200	30	0	0	0.47	0.11	4.87	1.73	40.9	14.1
levulinic acid	Corn		14	100	180	50	0	0.05	0.47	0.13	6.23	1.61	59	0.9
levulinic acid	Corn		15	20	180	10	0.72	6.09	0.59	0.15	2.26	1.76	21.9	46.9
levulinic acid	Corn		16	60	160	50	0.63	0.88	0.43	0	3.34	1.8	28.2	37.3
levulinic acid	Corn		17	100	160	30	0.23	2.51	0.45	0.14	5.01	1.84	34.2	31.3
levulinic acid	Corn											avrg	48.8118
levulinic acid	Corn												4.4
levulinic acid	Corn												69.1
levulinic acid	Corn
levulinic acid	Corn
levulinic acid	Corn
levulinic acid	Corn
levulinic acid	Corn
levulinic acid	Corn
levulinic acid	Corn		LA yield %	48.8118
levulinic acid	Corn		LA yield (g LA/g glucan)	34.9516
levulinic acid	Corn		g glucan in g Corn	83.1231
levulinic acid	Corn		LA yield (g LA/g corn)	0.290529
levulinic acid	Corn
levulinic acid	Corn	ref 5	Kinetic study of levulinic acid production from corn stalk at mild temperature using FeCl3 as catalyst
levulinic acid	Corn		https://www.sciencedirect.com/science/article/pii/S0016236116308754?via%3Dihub#t0015
levulinic acid	Corn		Table 3. Optimal treatment conditions of glucose and LA obtained from the kinetic model.
levulinic acid	Corn		T (°C)	FeCl3 concentration (mol/L)	Time (min)	Maximum glucose yield (%)	Time (min)	Maximum LA yield (%)
levulinic acid	Corn		160	0.1	40.87	12.18	462.84	9.24
levulinic acid	Corn			0.3	34.48	30.38	172.62	36.52
levulinic acid	Corn			0.5	18.82	30.37	94.26	44.44
levulinic acid	Corn
levulinic acid	Corn		180	0.1	29.66	30.62	147.35	27.23
levulinic acid	Corn			0.3	8.73	35.14	37.8	43.58
levulinic acid	Corn			0.5	3.91	27.85	21.28	47.1
levulinic acid	Corn
levulinic acid	Corn		200	0.1	12.63	30.83	62.34	25.28
levulinic acid	Corn			0.3	3.23	27.79	17.62	42.83
levulinic acid	Corn			0.5	1.6	23.89	10.04	45.38
levulinic acid	Corn						avrg	35.7333
levulinic acid	Corn
levulinic acid	Corn
levulinic acid	Corn
levulinic acid	Corn
levulinic acid	Corn
levulinic acid	Corn
levulinic acid	Corn
levulinic acid	Corn		LA yield %	35.7333
levulinic acid	Corn		LA yield ( g LA/ g glucan)	25.5868
levulinic acid	Corn		g glucan in g Corn	74.8108
levulinic acid	Corn		LA yield ( g LA/ g corn)	0.191417
levulinic acid
levulinic acid	corn germ	theoretical	Theoretical yield (g/g hexos)	0.521033
levulinic acid	corn germ		glu+fru in corn germ (g/100g)	16.6944
levulinic acid	corn germ		Theoretical yield (g/g rice)	0.0869836
levulinic acid	corn pericarp	theoretical	Theoretical yield (g/g hexos)	0.521033
levulinic acid	corn pericarp		glu+fru in corn pericarp (g/100g)	54.2556
levulinic acid	corn pericarp		Theoretical yield (g/g rice)	0.28269
lactic acid	corn	ref 1	Lactic acid production from corn stover using mixed cultures of Lactobacillus rhamnosus and Lactobacillus brevis
lactic acid	corn		https://linkinghub.elsevier.com/retrieve/pii/S0960852410015762
lactic acid	corn
lactic acid	corn		Table 2. Summary of lactic acid production of single strain L. rhamnosus or L. brevis or mixed cultures from NaOH-treated corn stover.
lactic acid	corn		Culture strategy	Lactic acid concentration (g/L)	Acetic acid concentration (g/L)	Lactic acid yield on substrate (g/g)⁎	Lactic acid productivity (g/L.h)
lactic acid	corn		L. rhamnosus	17.70 ± 0.46	0.74 ± 0.04	0.59 ± 0.02	0.49 ± 0.04
lactic acid	corn		L. brevis	16.71 ± 0.73	3.10 ± 0.18	0.54 ± 0.02	0.45 ± 0.02
lactic acid	corn		L. rhamnosus + L. brevis	20.95 ± 0.54	1.97 ± 0.12	0.70 ± 0.03	0.58 ± 0.03
lactic acid	corn		L. rhamnosus + L. brevis (12 h)	17.75 ± 0.60	1.05 ± 0.10	0.59 ± 0.02	0.49 ± 0.04
lactic acid	corn		⁎
lactic acid	corn		Lactic acid yield was based on the total weight of NaOH-treated corn stover added.
lactic acid	corn
lactic acid	corn
lactic acid	corn
lactic acid	corn		yield	0.59
lactic acid	corn			0.54
lactic acid	corn			0.7
lactic acid	corn			0.59
lactic acid	corn		avrg	0.605
lactic acid	corn
lactic acid	corn	ref 2	Bioconversion of Corn Crop Residues: Lactic Acid Production through Simultaneous Saccharification and Fermentation
lactic acid	corn		https://www.mdpi.com/2071-1050/14/19/11799		this is a review paper
lactic acid	corn		Table 1. Methodology and results from SSF experiments using wild-type microorganisms.
lactic acid	corn		Microorganism	Feedstock	Pretreatment a	Saccharification	Fermentation	Lactic Acid				Xylose	Reference
lactic acid	corn						Conditions	Yield	Titer (g/L)	Productivity (g/L⋅h)	Optical	Utilization
lactic acid	corn										Purity (%)
lactic acid	corn		Bacillus coagulans H-1	Corncob residue	Dilute acid	Cellulase cocktail (10 U/g cellulose) supplemented with β-glucosidases (15 U/g cellulose)	Batch culture at 50 °C, pH 6.0 and 10% (w/v) solids loading	0.85 c	68	1.89	100 g	No	[53]
lactic acid	corn		Bacillus coagulans L-LA 1507	Corn stover	NaOH pretreatment, at 118 °C for 1 h.	Commercial cocktail of cellulases from KDN Group	Sixth subsequent fed-batch cultures with recycled streams, at 50 °C and pH 6.2	0.396 b, d	93.42 e	2.14 d	N. R.	Yes	[68]
lactic acid	corn		Bacillus coagulans MXL-9	Corn fiber	Dilute acid (H2SO4) pretreatment, at 121°C for 1 h.	Mixture of Celluclast® 1.5 L and Novozyme 188. Saccharification 18 h prior to inoculation	Batch culture at 50°C, pH 6 and 10% (w/v) solids loading	N. R.	45.6	0.21	>99 g	Yes	[67]
lactic acid	corn		Bacillus coagulans LA204	Corncob	NaOH pretreatment, at 75 °C for 3 h	Cellic® CTec2 at 30 FPU/g DM	Fed-batch culture at 50 °C, pH 6 and 16% (w/w) solids loading	0.77 b	122.99	1.37	98 g	Yes	[32]
lactic acid	corn				NH3 for 1 day, and H2O2 for 7 days, without washing step			0.74 b	118.6	1.32	98 g
lactic acid	corn		Bacillus coagulans LA204	Corn stover	NaOH pretreatment, at 75 °C for 3 h	Cellic® CTec2 at 30 FPU/g DM	Fed-batch culture at 50 °C, pH 6 and 14.4% (w/w) solids loading	0.68 b	97.59	1.63	94.5 f, g	Yes	[59]
lactic acid	corn		Bacillus coagulans LA204	Corncob	NH3 for 2 days, and H2O2 for 7 days and biodetoxification	Enzymes isolated from a Trichoderma viride culture at 2.0 FPU/g DM	Fed-batch culture at 8% (w/w) solids loading	0.54 b	64.95	0.57	N. R.	Yes	[57]
lactic acid	corn		Pediococcus acidilactici DQ2	Corn stover	Dry dilute sulphuric acid pretreatment and biodetoxification	Accellerase 1000 at 15 FPU/g DM. Saccharification 8 h prior to inoculation	Batch culture at 48 °C, pH 5.5 and 27% (w/w) solids loading	77.2 d	101.9	1.06	63.4 g	Yes (at specific conditions)	[24]
lactic acid	corn		Pediococcus acidilactici PA204	Corn stover	NaOH pretreatment, at 75 °C for 3 h	Cellic® CTec2 at 30 FPU/g DM	Fed-batch culture at 37 °C, pH 6.0 and 15% (w/w) solids loading	0.69 b	104.11	1.24	N. R.	Yes	[38]
lactic acid	corn		Lactobacillus pentosus FL0421	Corn stover	NaOH pretreatment, at 75 °C for 3 h	Cellic® CTec2 at 30 FPU/g DM	Fed-batch culture at 37 °C, pH 6.0 and 14% (w/w) solids loading	0.66 b	92.3	1.92	98.1 g	Yes	[65]
lactic acid	corn		Lactobacillus pentosus ATCC 8041	Corn stover	Aqueous ammonia at 90 °C for 24 h	Spezyme CP cellulase at 5 FPU/g glucan	Fed-batch culture at 37 °C	65	74.8	0.7	N. R.	Yes	[40]
lactic acid	corn		Lactobacillus delbrueckii ATCC 9649	Corn stover	NaOH pretreatment, at 121 °C for 30 min.	Cellic® CTec2 at 8 FPU/g DM	Batch culture at 40 °C, pH 5.5, 4% (w/v) solids loading	0.58 b	20.1	0.32	99.9 h	No	[69]
lactic acid	corn		Lactobacillus rhamnosus CECT-288	Corncob	Autohydrolysis with water at 202 °C	Celluclast® at 30 FPU/g DM	Batch culture at 45 °C and 16.7% (w/v) solids loading	86.5 d	86.15	N.R.	N. R.	N. R.	[41]
lactic acid	corn		Lactobacillus rhamnosus + Lactobacillus brevis ATCC367	Corn stover	NaOH pretreatment, at room temperature for 12 h	Spezyme CP at 25 FPU/g glucan	Batch culture at 37 °C, pH 5 and 3% (w/v) solids loading	0.70 b	20.95	0.58	N.D.	Yes (by L. brevis)	[70]
lactic acid	corn		Lactobacillus plantarum ATCC 21028 + Lactobacillus brevis ATCC 367	Corn stover	NaOH pretreatment at 121 °C for 30 min	Cellic ® CTec2 at 8 FPU/g DM	Batch culture at 37 °C, pH 6.0 and 4% (w/v) solids loading	0.78 b	31.2	0.43	56.8 g	Yes (by L. brevis)	[71]
lactic acid	corn		Acremonium thermophilus ATCC 24622 + Rhizopus sp. MK-96-1196	Corncob	Milled only	Cellulase produced on-site by A. thermophilus	Batch culture at 30 °C, initial pH 4.5, aeration rate of 2 vvm and 10% solids loading	N. R.	24	N.R.	N.R.	Yes (by Rhizopus sp. MK-96-1196)	[30]
lactic acid	corn		Rhizopus oryzae NLX-M-1	Corncob	NaOH at 85–90 °C for 1 h, and neutralized H2SO4 solution	Cellic ® CTec2 at 60 mg protein/g DM	Batch culture at 40 °C, pH > 6.0 and aeration rate of 1 vvm and 10% (w/v) solids loading	0.60 b	60.3	1	100 g	Yes	[74]
lactic acid	corn		Trichoderma koningii	Corn straw	Milled and dipped in an ammonia liquor (8%)	Cellulase produced by T. koningii in a citric acid–sodium citrate buffer	Batch culture	0.204 c	20.4	0.283	N.R.	Yes	[75]
lactic acid	corn		a A washing step with water was performed after pretreatment in every experiment except for those that include a biodetoxification step or state it otherwise. b g LA/g loaded biomass. c g LA/g cellulose. d % with respect to maximum theoretical yield from cellulose. e Average from the six fermentation rounds. f Based on glucose as the only carbon source. g %L-LA. h
lactic acid	corn
lactic acid	corn		yield	yield	unit	Feedstock
lactic acid	corn		0.85 c	0.85	g LA/g cellulose	Corncob residue
lactic acid	corn		0.396 b, d	0.396	g LA/g loaded biomass	Corn stover
lactic acid	corn		N. R.	N. R.		Corn fiber
lactic acid	corn		0.77 b	0.77	g LA/g loaded biomass	Corncob
lactic acid	corn		0.74 b	0.74	g LA/g loaded biomass
lactic acid	corn		0.68 b	0.68	g LA/g loaded biomass	Corn stover
lactic acid	corn		0.54 b	0.54	g LA/g loaded biomass	Corncob
lactic acid	corn		77.2 d	77.2	% of maximum theoretical yield from cellulose	Corn stover
lactic acid	corn		0.69 b	0.69	g LA/g loaded biomass	Corn stover
lactic acid	corn		0.66 b	0.66	g LA/g loaded biomass	Corn stover
lactic acid	corn		65	65		Corn stover
lactic acid	corn		0.58 b	0.58	g LA/g loaded biomass	Corn stover
lactic acid	corn		86.5 d	86.5	% of maximum theoretical yield from cellulose	Corncob
lactic acid	corn		0.70 b	0.7	g LA/g loaded biomass	Corn stover
lactic acid	corn		0.78 b	0.78	g LA/g loaded biomass	Corn stover
lactic acid	corn		N. R.	N. R.		Corncob
lactic acid	corn		0.60 b	0.6	g LA/g loaded biomass	Corncob
lactic acid	corn		0.204 c	0.204	g LA/g cellulose	Corn straw
lactic acid	corn
lactic acid	corn
lactic acid	corn		corn stover	0.396	g LA/g loaded biomass	corncob
lactic acid	corn			0.68	g LA/g loaded biomass		0.77	g LA/g loaded biomass
lactic acid	corn			0.69	g LA/g loaded biomass		0.54	g LA/g loaded biomass
lactic acid	corn			0.66	g LA/g loaded biomass		0.6	g LA/g loaded biomass
lactic acid	corn			0.58	g LA/g loaded biomass	avrg	0.636667
lactic acid	corn			0.7	g LA/g loaded biomass
lactic acid	corn			0.78	g LA/g loaded biomass
lactic acid	corn		avrg	0.640857
lactic acid	corn
lactic acid	corn
lactic acid	corn
lactic acid	corn
lactic acid	corn	ref 5	Kinetics of lactic acid fermentation on glucose and corn by Lactobacillus amylophilus
lactic acid	corn		https://analyticalsciencejournals.onlinelibrary.wiley.com/doi/pdf/10.1002/jctb.280550204?casa_token=m_61vklgVJoAAAAA%3A2A_V9FGn4lW3mKab-7ep4yjb2KUl9pS0kGCydds9UHPkyFiBQig9M81uYAEAUmtuGBsGvvUEEZOa
lactic acid	corn		The fermentation took almost 72 h resulting in the production of 694 g acid per kg of mashed corn utilized.
lactic acid	corn
lactic acid	corn		yield g/g corn	0.694
lactic acid
lactic acid	corn germ	theoretical	https://link.springer.com/article/10.1007/s10570-019-02571-1
lactic acid	corn germ		Bioprocessing of rice husk into monosaccharides and the fermentative production of bioethanol and lactate
lactic acid	corn germ		YLA lactic acid yield expressed as percentage of theoretical lactic acid yield (0.76 g lactic acid per g sugar)
lactic acid	corn germ		theoretical yield (g lactic acid per g sugar)	0.76
lactic acid	corn germ		sugar from corn germ g/g	16.6944
lactic acid	corn germ		theoretical yield (g lactic acid per g orange)	0.126878
lactic acid
lactic acid	corn pericarp	theoretical	https://link.springer.com/article/10.1007/s10570-019-02571-1
lactic acid	corn pericarp		Bioprocessing of rice husk into monosaccharides and the fermentative production of bioethanol and lactate
lactic acid	corn pericarp		YLA lactic acid yield expressed as percentage of theoretical lactic acid yield (0.76 g lactic acid per g sugar)
lactic acid	corn pericarp		theoretical yield (g lactic acid per g sugar)	0.76
lactic acid	corn pericarp		sugar from corn pericarp g/g	69.7556
lactic acid	corn pericarp		theoretical yield (g lactic acid per g orange)	0.530142
sorbitol	corn	theoretical	https://link.springer.com/article/10.1007/s00253-002-1046-0
sorbitol			The biotechnological production of sorbitol
sorbitol			avrg conversion of glucose and fructose %	95.2
sorbitol			yield g/g glucose and fructose	0.962578
sorbitol			glu+ fru in corn %	87.0598
sorbitol			yield g/g corn	0.838019
sorbitol
sorbitol	corn germ	theoretical	https://link.springer.com/article/10.1007/s00253-002-1046-0
sorbitol			The biotechnological production of sorbitol
sorbitol			avrg conversion of glucose and fructose %	95.2
sorbitol			yield g/g glucose and fructose	0.962578
sorbitol			glu+ fru in corn %	16.6944
sorbitol			yield g/g corn	0.160697
sorbitol
sorbitol	corn pericarp	theoretical	https://link.springer.com/article/10.1007/s00253-002-1046-0
sorbitol			The biotechnological production of sorbitol
sorbitol			avrg conversion of glucose and fructose %	95.2
sorbitol			yield g/g glucose and fructose	0.962578
sorbitol			glu+ fru in corn %	54.2556
sorbitol			yield g/g corn	0.522252
xylitol	corn	ref 1	COMPARISON OF XYLITOL PRODUCTION FROM THE ISOLATED STRAIN OF CANDIDA SP., IN STATISTICALLY OPTIMIZED MODIFIED MINIMAL MEDIUM AND CORNCOB HYDROLYZATE MEDIUM
xylitol	corn		http://www.envirobiotechjournals.com/article_abstract.php?aid=6215&iid=196&jid=1
xylitol	corn		The average maximum yield of xylitol after 120 hours of fermentation at 30°c and pH 5.0 using Corn Cob was 0.34 g/g of xylose. Under optimum conditions, modified minimum medium yield of xylitol was 0.42 g/g of xylose.
xylitol	corn		yield g/g of xylose	0.42
xylitol	corn		yield g/g xylose	0.34
xylitol	corn		avrg	0.38
xylitol	corn		xylose in corn %	3.93677
xylitol	corn		yield g/g corn	0.0149597
xylitol	corn
xylitol	corn	ref 2	Optimization of dilute sulfuric acid pretreatment of corn stover for enhanced xylose recovery and xylitol production
xylitol	corn		https://link.springer.com/article/10.1007/s12257-016-0483-z
xylitol	corn		Optimization of dilute sulfuric acid pretreatment of corn stover for enhanced xylose recovery and xylitol production
xylitol	corn
xylitol	corn
xylitol	corn
xylitol	corn
xylitol	corn
xylitol	corn
xylitol	corn
xylitol	corn
xylitol	corn
xylitol	corn
xylitol	corn
xylitol	corn
xylitol	corn
xylitol	corn
xylitol	corn		yield	0.97
xylitol	corn			0.94
xylitol	corn			0.91
xylitol	corn			0.94
xylitol	corn			0.98
xylitol	corn			0.93
xylitol	corn			0.96
xylitol	corn			0.98
xylitol	corn			0.95
xylitol	corn		avrg	0.951111
xylitol	corn		xylose in corn %	3.93677
xylitol	corn		yield g/g corn	0.037443
xylitol	corn
xylitol	corn	ref 3	https://www.sciencedirect.com/science/article/pii/S096085242101018X
xylitol	corn		Particle size influence on the composition of sugars in corncob hemicellulose hydrolysate for xylose fermentation by Meyerozyma caribbica
xylitol	corn		Table 1. Over all mass balance analysis in synthetic, non detoxified and detoxified hydrolysate medium for xylitol fermentaion by M. carribica.
xylitol	corn		Inoculum	Empty Cell	10.0 ± 0.5 % of V/V M. caribbica with 5 g/L concentration of yeast extract	Empty Cell	Empty Cell
xylitol	corn		Mass balance parameters	Unit	Medium
xylitol	corn				Synthetic	Non detoxified hydrolysate	Detoxified hydrolysate
xylitol	corn		Initial xylose concentration	(g/L)	50.0 ± 5.0	50.0 ± 5.0	50.0 ± 5.0
xylitol	corn		Final xylose concentration at 120 h	(g/L)	0.310 ± 0.010	3.90 ± 0.5	0.15 ± 0.5
xylitol	corn		Xylose consumption	(%)	47.5 ± 1.290	38.50 ± 1.50	49.5 ± 1.00
xylitol	corn		Initial glucose concentration	(g/L)	0.00 ± 0.000	10.50 ± 0.5.	1.50 ± 0.50
xylitol	corn		Final glucose concentration	(g/L)	0.00 ± 0.000	9.00 ± 0.5.	5.00 ± 0.50
xylitol	corn		Glucose consumption	(%)	0.00 ± 0.000	0.02 ± 0.05	1.00 ± 0.50
xylitol	corn		Initial xyitol concentration	(g/L)	0.00 ± 0.000	0.00 ± 0.000	0.00 ± 0.000
xylitol	corn		Final xylitol concentration	(g/L)	22.50 ± 5.0	3.50 ± 0.050	25.00 ± 5.00
xylitol	corn		Xylitol yield t = 120 h	(%)	45.0 ± 1.00	10.00 ± 1.00	54.00 ± 1.00
xylitol	corn		Initial cells concentration	(%)	10.0 ± 0.50	10.0 ± 0.50	10.0 ± 0.50
xylitol	corn		Final cells concentration	(g cell/L)	5.00 ± 0.50	0.50 ± 0.50	10 ± 0.50
xylitol	corn		Biomass yield	(g/g) (YX/S)	0.193 ± 0.012	0.014 ± 0.50	1.093 ± 0.05
xylitol	corn		Xylitol productivity	g/L/h	0.166 ± 0.050	0.033 ± 0.010	0.250 ± 0.050
xylitol	corn		Specific growth rate	(h−1) (μ)	0.056 ± 0.01	0.026 ± 0.01	0.054 ± 0.01
xylitol	corn		NA: Not available; ND: Not detected; DNS: Data not showed in the study
xylitol	corn			yield
xylitol	corn			45
xylitol	corn			10
xylitol	corn			54
xylitol	corn		avrg (% g/g substrate)	36.3333
xylitol	corn		xylose in corn %	3.93677
xylitol	corn		yield g/g corn	0.0143036
xylitol	corn
xylitol	corn
xylitol	corn
xylitol	corn	ref 4	Optimized Production of Xylitol from Xylose Using a Hyper-Acidophilic Candida tropicalis
xylitol	corn		https://www.mdpi.com/2218-273X/5/3/1979
xylitol	corn		Scaling up on 3 L fermenter, with a fed-batch strategy, the best xylitol yield was 86.84% (w/w), against a 90% of theoretical yield.
xylitol	corn		xylitol yield on consumed substrate coefficient (Yp/s)
xylitol	corn
xylitol	corn		yield (% g/g xylose)	0.8684
xylitol	corn		xylose in corn %	3.93677
xylitol	corn		yield g/g corn	0.0341869
xylitol	corn
xylitol	corn
xylitol	corn	ref 5	Combination of the CRP mutation and ptsG deletion in Escherichia coli to efficiently synthesize xylitol from corncob hydrolysates
xylitol	corn		https://link.springer.com/article/10.1007/s00253-019-10324-0
xylitol	corn			yield	unit
xylitol	corn			1.02	g/g xylose
xylitol	corn			1.49	g/g glucose
xylitol	corn			1	g/g xylose
xylitol	corn			1.67	g/g glucose
xylitol	corn			2.74	g/g xylose
xylitol	corn			1.67	g/g glucose
xylitol	corn
xylitol	corn
xylitol	corn		yield (% g/g xylose)	1.58667
xylitol	corn		yield (% g/g glucose)	1.61
xylitol	corn
xylitol	corn		yield ( g/g xylose)	1.58667
xylitol	corn		xylose in corn %	3.93677
xylitol	corn		yield g/g corn	0.0624634
xylitol	corn
xylitol	corn		yield ( g/g glucose)	1.61
xylitol	corn		glucose in corn %	83.1231
xylitol	corn		yield g/g corn	1.33828
xylitol	corn germ
xylitol	corn germ	theoretical	https://www.sciencedirect.com/science/article/pii/S0922338X98800263?casa_token=aLqBeV90biIAAAAA:uqYoRDUYXPdbjyYra-122gWl9FVoabLSx-h_EHf6fDpWVOsKLf0qIS6Sd5kzioR63hHTDi8
xylitol	corn germ		Microbial conversion of d-xylose to xylitol
xylitol	corn germ		avrg Yx/s (g xylitol/g xylose)	0.485909
xylitol	corn germ		xylose in corn germ %	0
xylitol	corn germ		yield (g xylitol / g corn germ)	0
xylitol	corn germ
xylitol	corn germ
xylitol	corn pericarp
xylitol	corn pericarp	theoretical	https://www.sciencedirect.com/science/article/pii/S0922338X98800263?casa_token=aLqBeV90biIAAAAA:uqYoRDUYXPdbjyYra-122gWl9FVoabLSx-h_EHf6fDpWVOsKLf0qIS6Sd5kzioR63hHTDi8
xylitol	corn pericarp		Microbial conversion of d-xylose to xylitol
xylitol	corn pericarp		avrg Yx/s (g xylitol/g xylose)	0.485909
xylitol	corn pericarp		xylose in corn pericarp %	15.5
xylitol	corn pericarp		yield (g xylitol / g corn pericarp)	0.0753159
xylitol	corn pericarp

## Sheet: Wheat
Chemical	FL
Ethanol	Wheat	Ref 1	https://www.sciencedirect.com/science/article/pii/S096195341300295X											Table 3
Ethanol	Wheat		Simultaneous saccharification and co-fermentation of whole wheat in integrated ethanol production - ScienceDirect
Ethanol	Wheat		Series		Glu remained	Xylose available	Xylose consa	Xylitol	Glycerol	Ethanol	Ethanol yieldc	Ethanol yieldc	Ethanol yieldd	Total amount of glucose and xylose in wheat	Ethanol yield	Average
Ethanol	Wheat				g L−1	g L−1	%	%,b g L−1	g L−1	g L−1	g g−1	%	%	%	g/g wheat	g/g wheat
Ethanol	Wheat		1	7.5	0.7	23.2	35	43, 3.5	3.7	26.8	0.31	61	86	74.8335	0.456484	0.486418
Ethanol	Wheat			7.5 + 1(AMG, 0)	1.0	23.3	30	36, 2.5	4.7	43.7	0.36	69	89		0.516351
Ethanol	Wheat			7.5 + 1(AMG, 24)	1.0	23.3	37	34, 3.0	4.8	43.0	0.35	69	86		0.516351
Ethanol	Wheat		2	10	0.3	38.5	33	18, 2.3	4.3	34.6	0.28	55	79		0.411584
Ethanol	Wheat			10 + 1.3(AMG, 0)	8.5	38.8	28	10, 1.0	5.6	52.6	0.31	60	83		0.449001
Ethanol	Wheat			10 + 1.3(AMG, 24)	8.3	38.9	28	10, 1.1	5.5	53.0	0.31	60	84		0.449001
Ethanol	Wheat		3	7.5	0.2	25.6	41	20, 2.9	2.1	26.7	0.29	57	83		0.426551
Ethanol	Wheat			7.5 + 120	1.0	25.9	34	13, 1.5	3.3	43.5	0.34	66	88		0.493901
Ethanol	Wheat			7.5 + 120,24,28	2.8	25.9	29	11, 1.1	3.3	42.3	0.33	65	89		0.486418
Ethanol	Wheat		4	7.5 + glu feed∼1	0.6	25.5	29	46, 3.4	3.2	48.8	0.38	75	99		0.561251
Ethanol	Wheat			7.5 + glu feed∼1.3	1.6	25.5	33	45, 3.7	3.4	56.5	0.40	78	100		0.583701
Ethanol	Wheat										MAX	78
Ethanol	Wheat										MIN	55
Ethanol	Wheat
Ethanol	Wheat	Ref 2	https://www.sciencedirect.com/science/article/pii/S0957582007714428
Ethanol	Wheat		Optimization of Innovative Ethanol Production from Wheat by Response Surface Methodology - ScienceDirect
Ethanol	Wheat		Tests	Glucose (g l−1)	FAN (mg l−1)	Temperature (°C)	Ethanol (%)	Ye/g (%)	Total higher alcohols (ppm)	YCO2 (%)	Glucose in wheat (g/g)	Ethanol yield (g/g wheat)	Average
Ethanol	Wheat		1	−1	−1	−1	5.80	41.5	792	38.19	70.7767	0.293723	g/g wheat
Ethanol	Wheat		2	−1	−1	1	7.14	42.93	775	42.28		0.303844	0.313589
Ethanol	Wheat		3	−1	1	−1	7.31	45.73	858	37.57		0.323662
Ethanol	Wheat		4	−1	1	1	7.57	46.68	696	41.95		0.330385
Ethanol	Wheat		5	1	−1	−1	4.93	49.44	680	45.36		0.34992
Ethanol	Wheat		6	1	−1	1	6.35	40.72	887	48.79		0.288203
Ethanol	Wheat		7	1	1	−1	4.37	37.91	906	29.35		0.268314
Ethanol	Wheat		8	1	1	1	2.73	29.98	905	27.87		0.212188
Ethanol	Wheat		9	−1.2872	0	0	8.64	45.65	916	45.53		0.323095
Ethanol	Wheat		10	12872	0	0	6.99	47.75	806	49.65		0.337959
Ethanol	Wheat		11	0	−1.2872	0	5.74	41.62	878	43.67		0.294572
Ethanol	Wheat		12	0	12872	0	5.66	45.3	853	40.44		0.320618
Ethanol	Wheat		13	0	0	−1.2872	7.19	50.16	836	46.78		0.355016
Ethanol	Wheat		14	0	0	12872	5.72	45.7	863	45.25		0.323449
Ethanol	Wheat		15	0	0	0	8.04	47.94	844	47.17		0.339303
Ethanol	Wheat		16	0	0	0	8.51	49.9	881	47.95		0.353176
Ethanol	Wheat						MAX	50.16
Ethanol	Wheat						MIN	29.98
Ethanol	Wheat
Ethanol	Wheat	Ref 3	https://www.sciencedirect.com/science/article/pii/S1359511309000439?pes=vor#bib39
Ethanol	Wheat		Particulate bioprocessing: A novel process strategy for biorefineries
Ethanol	Wheat		The glucose to ethanol yield reached 0.41 g g−1, equivalent to 80% of the theoretical value, proving that our feedstock and the system proposed is suitable for biofuel production
Ethanol	Wheat		yield g/g glucose	0.41
Ethanol	Wheat		Glucose in wheat (g/g)	70.7767
Ethanol	Wheat		yield g/g wheat	0.290184
Ethanol	Wheat
Ethanol	Wheat	Ref 4	https://analyticalsciencejournals.onlinelibrary.wiley.com/doi/full/10.1002/jctb.3822
Ethanol	Wheat		Ethanol and chitosan production from wheat hydrolysate by Mucor hiemalis
Ethanol	Wheat		Table 2. Ethanol, glycerol, and biomass yields of M. hiemalis during anaerobic cultivation on wheat hydrolysate
Ethanol	Wheat						Maximum yield of fermentation products (g g-1)
Ethanol	Wheat		Glucose (g L−1)	Consumed glucosea (g L−1)	Time to reach maximum ethanol concentration (h)	Initial average glucose uptake rateb (g L−1 h−1)	Ethanol	Glycerol	Biomassc
Ethanol	Wheat		15	15	12	0.6	0.3	0.082	0.089
Ethanol	Wheat		45	39	18	1.6	0.46	0.09	0.062
Ethanol	Wheat		75	50	60	2.1	0.45	0.087	0.054
Ethanol	Wheat		100	70	72	2.9	0.43	0.08	0.042
Ethanol	Wheat		130	78	72	3.2	0.4	0.069	0.032
Ethanol	Wheat		145	86	72	3.6	0.37	0.065	0.027
Ethanol	Wheat		190	102	72	4.2	0.37	0.052	0.02
Ethanol	Wheat		a After 24 h.
Ethanol	Wheat		b During 24 h.
Ethanol	Wheat		c The biomass yield was measured at 72 h.
Ethanol	Wheat
Ethanol	Wheat		yield g/g glucose	0.397143
Ethanol	Wheat		Glucose in wheat (g/g)	70.7767
Ethanol	Wheat		yield g/g wheat	0.281084
Ethanol	Wheat
Ethanol	Wheat	Ref 5	https://onlinelibrary.wiley.com/doi/10.1002/ceat.201400763
Ethanol	Wheat		Modeling of High-Concentration Ethanol Production by Mucor hiemalis
Ethanol	Wheat		Table 2. Ethanol and biomass yield in cultivation of M. hiemalis with different initial glucose concentration from wheat hydrolysate.
Ethanol	Wheat		Glucose [g L−1]	Maximum concentration of fermentation products [g L−1]		Maximum yield of fermentation products [g g−1]
Ethanol	Wheat			Ethanol	Biomass	Ethanol	Biomass	yield
Ethanol	Wheat		30	14.2 ± 1.5	7.3	0.35 ± 0.02	0.30 ± 0.01	0.35
Ethanol	Wheat		70	27.7 ± 3.2	6.8	0.44 ± 0.02	0.11 ± 0.015	0.44
Ethanol	Wheat		100	34.0 ± 2.9	6.1	0.43 ± 0.03	0.07 ± 0.002	0.43
Ethanol	Wheat		120	34.5 ± 2	5.1	0.38 ± 0.01	0.05 ± 0.003	0.38
Ethanol	Wheat
Ethanol	Wheat		yield g/g glucose	0.4
Ethanol	Wheat		Glucose in wheat (g/g)	70.7767
Ethanol	Wheat		yield g/g wheat	0.283107
Ethanol	Wheat
Ethanol	Wheat
Ethanol	Wheat
Ethanol	Wheat
Ethanol	Wheat
Ethanol	Wheat Bran	Ref 1	https://www.sciencedirect.com/science/article/pii/S0141022910002607
Ethanol	Wheat Bran		Direct ethanol production from starch, wheat bran and rice straw by the white rot fungus Trametes hirsuta - ScienceDirect
Ethanol	Wheat Bran		These ethanol yields are significantly lower than those from wheat bran (0.215 g/g) and rice straw (0.150 g/g) observed in the present study, even after taking into account the different source materials used.
Ethanol	Wheat Bran		Ethanol yied (g/g wheat bran)	0.215
Ethanol	Wheat Bran
Ethanol	Wheat Bran	Ref 2	https://www.sciencedirect.com/science/article/pii/S0961953412002784
Ethanol	Wheat Bran		Processing wheat bran into ethanol using mild treatments and highly fermentative yeasts - ScienceDirect
Ethanol	Wheat Bran		The high fermentative performance of S. cerevisiae s1 showed that the strain is suitable for industrial ethanol production having an outstanding ethanol yield of about 0.48 g ethanol per g of glucose, corresponding to 95% of the theoretical value. Since the ethanol performance was very similar to that of reference medium, 0.48 g g−1 (Fig. 4b), the yeast seemed not to be affected by inhibitory com…
Ethanol	Wheat Bran		Strain	Ethanol yield (g/g glucose)	glucose in wheat bran (%)	Ethanol yield (g/g wheat bran)	Average
Ethanol	Wheat Bran		S. cerevisiae	0.48	34.8356	0.167211	0.155018
Ethanol	Wheat Bran		S. diastaticus ATCC 13007	0.41		0.142826
Ethanol	Wheat Bran
Ethanol	Wheat Bran	Ref 3	Utilisation of wheat bran as a substrate for bioethanol production using recombinant cellulases and amylolytic yeast
Ethanol	Wheat Bran		https://www.sciencedirect.com/science/article/pii/S0306261915011691?via%3Dihub
Ethanol	Wheat Bran		Table 3. Conversion of glucose and wheat bran’s starch and/or cellulose to ethanol by wild type S. cerevisiae yeast (MEL2 and M2n) and their respective engineered strains: MEL2[TLG1-SFA1] and M2n[TLG1-SFA1]. SSF of wheat bran (10% w/v) was conducted with or without RCC (recombinant cellulase cocktail).
Ethanol	Wheat Bran		Strain	Highest ethanol concentration (g/L)	Glucose utilisation (%)	Starch utilisation (%)	Cellulose utilisation (%)	YE/S (g/g)	Yield (g/g)	Q (g/L/h)	Qmax (g/L/h)
Ethanol	Wheat Bran		Glucose (30 g/L) medium
Ethanol	Wheat Bran		MEL2	14.29	100	–	–	0.48 (94%)	0.48	0.22	0.74
Ethanol	Wheat Bran		MEL2[TLG1-SFA1]	14.12	100	–	–	0.47 (93%)	0.47	0.21	0.73
Ethanol	Wheat Bran		M2n	14.18	100	–	–	0.47 (93%)	0.47	0.21	0.73
Ethanol	Wheat Bran		M2n[TLG1-SFA1]	13.92	100	–	–	0.47 (91%)	0.47	0.21	0.72
Ethanol	Wheat Bran
Ethanol	Wheat Bran		Wheat bran without RCC
Ethanol	Wheat Bran		MEL2	0.18	–	0	0	–		–	–
Ethanol	Wheat Bran		MEL2[TLG1-SFA1]	5.26	–	100	0	0.48 (85%)	0.48	0.07	0.18
Ethanol	Wheat Bran		M2n	0.23	–	0	0	–		–	–
Ethanol	Wheat Bran		M2n[TLG1-SFA1]	5.01	–	100	0	0.45 (81%)	0.45	0.07	0.17
Ethanol	Wheat Bran
Ethanol	Wheat Bran		Wheat bran with RCC
Ethanol	Wheat Bran		MEL2	2.3	–	0	41	0.50 (89%)	0.5	0.03	0.09
Ethanol	Wheat Bran		MEL2[TLG1-SFA1]	7.3	–	100	37	0.50 (89%)	0.5	0.1	0.22
Ethanol	Wheat Bran		M2n	2.29	–	0	40	0.50 (89%)	0.5	0.03	0.09
Ethanol	Wheat Bran		M2n[TLG1-SFA1]	7	–	100	37	0.49 (88%)	0.49	0.1	0.2
Ethanol	Wheat Bran		YE/S, ethanol yield per gram of consumed substrate calculated on the highest ethanol production and % of theoretical maximum indicated in brackets.					avrg	0.481
Ethanol	Wheat Bran		yield (gethanol/g of consumed substrate)	0.481
Ethanol	Wheat Bran		tot glucose in wheat bran	34.8356
Ethanol	Wheat Bran		yield (gethanol/g wheat bran)	0.167559
Ethanol	Wheat Bran
Ethanol	Wheat Bran	ref 4	Using an efficient fermenting yeast enhances ethanol production from unfiltered wheat bran hydrolysates
Ethanol	Wheat Bran		https://www.sciencedirect.com/science/article/pii/S0306261912004357?via%3Dihub
Ethanol	Wheat Bran		Table 3. Products formation by S. cerevisiae strains after 21 days fermentation at 25 °C in MNS broth with glucose (200 g/L), glucose (150 g/L) and xylose (50 g/L), and glucose (100 g/L) and xylose (100 g/L) as substrate.
Ethanol	Wheat Bran		Medium	Product (g/L)	MH1000	MEL1	MEL2	MEL3	MEL4	MEL5	F6	F9	DSM70449	avrg
Ethanol	Wheat Bran		MNS (200 g/L glucose)
Ethanol	Wheat Bran		Substrate remaining	Glucose	15.2	3.1	–	21.2	–	2.5	–	28	24.1
Ethanol	Wheat Bran		Products formed	Glycerol	7	5.3	5.1	6.3	5.5	7.2	6.5	5.9	6.1
Ethanol	Wheat Bran			Ethanol	84.8	93.3	97	85.7	87.9	87.1	93.9	79.6	81.3
Ethanol	Wheat Bran		Ethanol yielda		0.46	0.47	0.49	0.48	0.44	0.44	0.47	0.46	0.46	0.463333
Ethanol	Wheat Bran				-0.9	-0.91	-0.95	-0.94	-0.86	-0.86	-0.92	-0.91	-0.9
Ethanol	Wheat Bran
Ethanol	Wheat Bran		MNS (150 g/L glucose and 50 g/L xylose)
Ethanol	Wheat Bran		Substrate remaining	Glucose	10.9	8.6	3.7	3.2	-	15	5.5	20	22.3
Ethanol	Wheat Bran			Xylose	46	45.3	44.8	45	44.5	44.2	44.7	45.4	44.3
Ethanol	Wheat Bran		Products formed	Xylitol	3.6	3.5	4.8	3.8	4.1	4.8	4	4	5.1
Ethanol	Wheat Bran			Glycerol	4.8	4.1	4	3.9	4.5	5	4.2	3.9	4.3
Ethanol	Wheat Bran			Ethanol	60.6	59.6	68.6	64.7	65.5	58	62.4	56.6	54.7
Ethanol	Wheat Bran		Ethanol yielda		0.46	0.42	0.47	0.44	0.44	0.43	0.43	0.44	0.43	0.44
Ethanol	Wheat Bran				-0.85	-0.83	-0.92	-0.86	-0.86	-0.84	-0.85	-0.85	-0.84
Ethanol	Wheat Bran
Ethanol	Wheat Bran		MNS (100 g/L glucose and 100 g/L xylose)
Ethanol	Wheat Bran		Substrate remaining	Glucose	–	–	–	–	–	–	–	–	6.7
Ethanol	Wheat Bran			Xylose	97.4	93.3	95.8	94.5	95.5	96	95.2	95.4	94.3
Ethanol	Wheat Bran		Products formed	Xylitol	2.9	3.7	3.1	3.5	3.3	3.1	3.5	3.3	4.6
Ethanol	Wheat Bran			Glycerol	4.2	3.9	3.7	3.5	4.1	4.2	3.4	3.1	4
Ethanol	Wheat Bran			Ethanol	37	40.5	45	33.9	36.5	32	39.4	30.9	33.5
Ethanol	Wheat Bran		Ethanol yielda		0.37	0.4	0.45	0.34	0.37	0.32	0.39	0.31	0.36	0.367778
Ethanol	Wheat Bran				-0.73	-0.79	-0.88	-0.66	-0.72	-0.63	77%)	-0.61	-0.7
Ethanol	Wheat Bran		a
Ethanol	Wheat Bran		Ethanol yield as g/g and % of theoretical maximum (0.51 g/g from glucose) indicated in brackets.
Ethanol	Wheat Bran		yield (g/g glucose)	0.423704
Ethanol	Wheat Bran		tot glucose in wheat bran	34.8356
Ethanol	Wheat Bran		yield (gethanol/g wheat bran)	0.1476
Ethanol	Wheat Bran	ref 5	Processing wheat bran into ethanol using mild treatments and highly fermentative yeasts
Ethanol	Wheat Bran		https://www.sciencedirect.com/science/article/pii/S0961953412002784?via%3Dihub
Ethanol	Wheat Bran		All fermentation kinetics were also evaluated considering the difference between the observed ethanol yields, displayed by the yeasts at the end of the fermentations, and the expected ones according to the alcohol yield obtained in the reference fermentations by S. diastaticus ATCC 13007 (0.41 g g_x0001_1 ) and S. cerevisiae (0.48 g g_x0001_1 ).
Ethanol	Wheat Bran		yield (g ethanol /g consumed glucose)	0.41
Ethanol	Wheat Bran			0.48
Ethanol	Wheat Bran		avrg	0.445
Ethanol	Wheat Bran		tot glucose in wheat bran	34.8356
Ethanol	Wheat Bran		yield (gethanol/g wheat bran)	0.155018
Ethanol	Wheat Bran
Ethanol	Wheat Bran
Ethanol	Wheat Bran
Ethanol	Wheat Bran
Ethanol	Wheat Bran
Ethanol	Wheat Bran
Ethanol	Wheat Bran
Ethanol	Wheat germ	theoretical	C6H12O6 = 2 C2H5OH + 2 CO2
Ethanol	Wheat germ		180	46
Ethanol	Wheat germ		ethanol g/ g sugar	0.51143
Ethanol	Wheat germ		sugar in wheat germ %	41.8
Ethanol	Wheat germ		ethanol /wheat germ g/g	0.213778
Ethanol	Wheat germ
Furfural	Wheat	Ref 1	https://www.sciencedirect.com/science/article/pii/S2589014X22000792
Furfural	Wheat		Development of a universal method for high yield of furfural and hydrogen from raw lignocellulosic biomass - ScienceDirect
Furfural	Wheat		The highest furfural production of 154 mg g−1 substrate was obtained from wheat straw.
Furfural	Wheat		Furfural (mg/g wheat)	154
Furfural	Wheat		Furfural yield (g/g)	0.154
Furfural	Wheat
Furfural	Wheat	Ref 2	https://www.sciencedirect.com/science/article/pii/S0960852412000375
Furfural	Wheat		Optimization of furfural and 5-hydroxymethylfurfural production from wheat straw by a microwave-assisted process - ScienceDirect
Furfural	Wheat		Standard order	Factor 1 (X1)	Factor 2 (X2)	Factor 3 (X3)	Factor 4 (X4)	Furansa		Sugarsb		Solid residuec (%)
Furfural	Wheat			Temperature (°C)	Time (min)	pH	Liquid:solid ratio (mL/g)	Furfural (%)	HMF (%)	Glucose (%)	Xylose (%)		Total sugar in wheat (%)	Furfural yield (g/g wheat)	average
Furfural	Wheat		1	155 (−1)	11 (−1)	1.6 (−1)	60 (−1)	1.4	0.4	5.6	95.3	55.6	74.8335	0.0104767	0.197614
Furfural	Wheat		2	155 (−1)	11 (−1)	0.6 (+1)	60 (−1)	32.9	0.64	23.1	48.7	43.1		0.246202
Furfural	Wheat		3	155 (−1)	11 (−1)	1.6 (−1)	150 (+1)	1.8	0.37	6.3	77.9	53.9		0.01347
Furfural	Wheat		4	155 (−1)	11 (−1)	0.6 (+1)	150 (+1)	34.7	0.61	24	52.1	35.5		0.259672
Furfural	Wheat		5	155 (−1)	31 (+1)	1.6 (−1)	60 (−1)	4.8	0.55	6.6	90.2	54		0.0359201
Furfural	Wheat		6	155 (−1)	31 (+1)	0.6 (+1)	60 (−1)	46.9	1.27	43.7	10.6	33.4		0.350969
Furfural	Wheat		7	155 (−1)	31 (+1)	1.6 (−1)	150 (+1)	6.3	0.56	7.4	99.1	55.4		0.0471451
Furfural	Wheat		8	155 (−1)	31 (+1)	0.6 (+1)	150 (+1)	51.3	1.38	40.2	5.9	26.7		0.383896
Furfural	Wheat		9	185 (+1)	11 (−1)	1.6 (−1)	60 (−1)	21.4	1.12	19	70.8	46		0.160144
Furfural	Wheat		10	185 (+1)	11 (−1)	0.6 (+1)	60 (−1)	33.9	0.54	8.8	0	18.3		0.253686
Furfural	Wheat		11	185 (+1)	11 (−1)	1.6 (−1)	150 (+1)	31.1	1.39	23.9	56.4	45.8		0.232732
Furfural	Wheat		12	185 (+1)	11 (−1)	0.6 (+1)	150 (+1)	40.7	0.35	2.5	0.4	13		0.304572
Furfural	Wheat		13	185 (+1)	31 (+1)	1.6 (−1)	60 (−1)	39.9	2.29	38.3	28.2	38		0.298586
Furfural	Wheat		14	185 (+1)	31 (+1)	0.6 (+1)	60 (−1)	23.8	0	0	4.1	21.9		0.178104
Furfural	Wheat		15	185 (+1)	31 (+1)	1.6 (−1)	150 (+1)	38.3	2.09	34.3	23.4	40.3		0.286612
Furfural	Wheat		16	185 (+1)	31 (+1)	0.6 (+1)	150 (+1)	22.1	0	0	10.6	16.3		0.165382
Furfural	Wheat		17	140 (−2)	21 (0)	1.1 (0)	105 (0)	3.3	0.48	6.1	93.9	51.1		0.024695
Furfural	Wheat		18	200 (+2)	21 (0)	1.1 (0)	105 (0)	37.9	0.45	1.1	5	17.9		0.283619
Furfural	Wheat		19	170 (0)	1 (−2)	1.1 (0)	105 (0)	4.8	0.65	6.9	97.1	53.8		0.0359201
Furfural	Wheat		20	170 (0)	41 (+2)	1.1 (0)	105 (0)	40.8	1.61	36.9	18.9	37		0.305321
Furfural	Wheat		21	170 (0)	21 (0)	1.1 (0)	15 (−2)	21.9	0.89	17.8	71.6	52.2		0.163885
Furfural	Wheat		22	170 (0)	21 (0)	1.1 (0)	195 (+2)	32.9	1.1	20.4	26.2	36.2		0.246202
Furfural	Wheat		23	170 (0)	21 (0)	2.1 (−2)	105 (0)	2.4	0.38	3.9	78.6	52.4		0.01796
Furfural	Wheat		24	170 (0)	21 (0)	0.1 (+2)	105 (0)	15	0	0	5	17.2		0.11225
Furfural	Wheat		25	170 (0)	21 (0)	1.1 (0)	105 (0)	33.4	1.11	28.1	36.4	41.8		0.249944
Furfural	Wheat		26	170 (0)	21 (0)	1.1 (0)	105 (0)	35.2	1.22	30.1	38.4	40.1		0.263414
Furfural	Wheat		27	170 (0)	21 (0)	1.1 (0)	105 (0)	41.9	1.43	33.1	30	39.1		0.313552
Furfural	Wheat		28	170 (0)	21 (0)	1.1 (0)	105 (0)	38.6	1.23	30.7	37.8	36.1		0.288857
Furfural	Wheat						MAX	51.3
Furfural	Wheat						MIN	1.4
Furfural	Wheat
Furfural	Wheat
Furfural	Wheat
Furfural	Wheat
Furfural	Wheat
Furfural	Wheat	Ref 3	https://www.sciencedirect.com/science/article/pii/S0378382017319549			Table 3
Furfural	Wheat		Efficient production of furfural from xylose and wheat straw by bifunctional chromium phosphate catalyst in biphasic systems - ScienceDirect
Furfural	Wheat		Entry	Reaction temperature/°C	Reaction time/min	Catalyst dosage/g	Furfural yield/%	HMF yield/%	Furfural yield (g/g xylosein wheat)	Xylose in wheat (%)	Furfural yield (g/g wheat)	average
Furfural	Wheat		1	170	90	0.3	36	19	0.230403	4.05682	0.0437766	0.0587163
Furfural	Wheat		2	180	90	0.3	50	31	0.320005		0.0608009
Furfural	Wheat		3	190	90	0.3	45	34	0.288004		0.0547208
Furfural	Wheat		4	180	60	0.3	42	21	0.268804		0.0510727
Furfural	Wheat		5	180	120	0.3	40	25	0.256004		0.0486407
Furfural	Wheat		6	180	90	0.4	67	32	0.428806		0.0814732
Furfural	Wheat		7	180	90	0.5	58	27	0.371205		0.070529
Furfural	Wheat					MAX	67
Furfural	Wheat					MIN	36
Furfural	Wheat		The composition of wheat straw was determined by the standard NREL laboratory analytical procedures [28], the content is as follows: ash (9.8%), glucan (35.5%), xylan (21.9%), arabinan (2.1%), galactan (1.6%), lignin (20.1%) and others (9%).
Furfural	Wheat
Furfural	Wheat	Ref 4	https://pubs.rsc.org/en/content/articlelanding/2015/RA/C5RA07159C
Furfural	Wheat		Relevance of the acidic 1-butyl-3-methylimidazolium hydrogen sulphate ionic liquid in the selective catalysis of the biomass hemicellulose fraction - RSC Advances (RSC Publishing)
Furfural	Wheat
Furfural	Wheat								Furfural yield % (g/ g xylan+arb)	xylan + arb in wheat (%)	Furfural yield (g/g wheat)	average
Furfural	Wheat								0.1	4.05682	4.05682e-05	0.0070495
Furfural	Wheat								0.2		8.11364e-05
Furfural	Wheat								0.3		0.000121705
Furfural	Wheat								3.1		0.00125761
Furfural	Wheat								14.3		0.00580125
Furfural	Wheat								10.9		0.00442193
Furfural	Wheat								26.1		0.0105883
Furfural	Wheat								23.4		0.00949295
Furfural	Wheat								30.7		0.0124544
Furfural	Wheat								36.2		0.0146857
Furfural	Wheat								30.6		0.0124139
Furfural	Wheat								34.4		0.0139555
Furfural	Wheat								15.6		0.00632864
Furfural	Wheat							MAX	36.2
Furfural	Wheat							MIN	0.1
Furfural	Wheat
Furfural	Wheat
Furfural	Wheat		chemical analysis of the raw material (dry weight basis) was taken from literature21 and was as follows: 38.8% _x0003_ 0.1% glucan, 19.5% _x0003_ 0.4% xylan, 2.9% _x0003_ 0.01% arabinan, 2.7% _x0003_ 0.03% acetyl groups, 17.6% _x0003_ 0.1% Klason lignin, 9.7% _x0003_ 0.03% protein and 4.5% _x0003_ 0.1% ash.
Furfural	Wheat
Furfural	Wheat	theoretical	https://ift.co.za/media/mediafiles/archive/SAIChE%20Congress%202003%20Arnold%20and%20Buzzard%20paper.pdf
Furfural	Wheat		A NOVEL PROCESS FOR FURFURAL PRODUCTION
Furfural	Wheat
Furfural	Wheat		𝒀_(𝒇𝒖𝒓𝒇𝒖𝒓𝒂𝒍/𝒙𝒚𝒍𝒐𝒔𝒆 )	0.7272
Furfural	Wheat		xylose content	4.05682
Furfural	Wheat		Y furfural / biomass	0.0295012
Furfural	Wheat
Furfural	Wheat
Furfural	Wheat Bran	theoretical	https://ift.co.za/media/mediafiles/archive/SAIChE%20Congress%202003%20Arnold%20and%20Buzzard%20paper.pdf
Furfural	Wheat Bran		A NOVEL PROCESS FOR FURFURAL PRODUCTION
Furfural	Wheat Bran
Furfural	Wheat Bran		𝒀_(𝒇𝒖𝒓𝒇𝒖𝒓𝒂𝒍/𝒙𝒚𝒍𝒐𝒔𝒆 )	0.7272
Furfural	Wheat Bran		xylose content	15.3
Furfural	Wheat Bran		Y furfural / biomass	0.111262
Furfural	Wheat Bran
Furfural	Wheat germ	theoretical	https://ift.co.za/media/mediafiles/archive/SAIChE%20Congress%202003%20Arnold%20and%20Buzzard%20paper.pdf
Furfural	Wheat germ		A NOVEL PROCESS FOR FURFURAL PRODUCTION
Furfural	Wheat germ
Furfural	Wheat germ		𝒀_(𝒇𝒖𝒓𝒇𝒖𝒓𝒂𝒍/𝒙𝒚𝒍𝒐𝒔𝒆 )	0.7272
Furfural	Wheat germ		xylose content	0
Furfural	Wheat germ		Y furfural / biomass	0
Furfural
HMF	Wheat	Ref 1	https://www.sciencedirect.com/science/article/pii/S0960852412000375
HMF	Wheat		Optimization of furfural and 5-hydroxymethylfurfural production from wheat straw by a microwave-assisted process - ScienceDirect
HMF	Wheat		Standard order	Factor 1 (X1)	Factor 2 (X2)	Factor 3 (X3)	Factor 4 (X4)	Furansa		Sugarsb		Solid residuec (%)
HMF	Wheat			Temperature (°C)	Time (min)	pH	Liquid:solid ratio (mL/g)	Furfural (%)	HMF (%)	Glucose (%)	Xylose (%)		Total sugars in wheat (%)	HMF yield (g/g)	average
HMF	Wheat		1	155 (−1)	11 (−1)	1.6 (−1)	60 (−1)	1.4	0.4	5.6	95.3	55.6	74.8335	0.00299334	0.0064437
HMF	Wheat		2	155 (−1)	11 (−1)	0.6 (+1)	60 (−1)	32.9	0.64	23.1	48.7	43.1		0.00478934
HMF	Wheat		3	155 (−1)	11 (−1)	1.6 (−1)	150 (+1)	1.8	0.37	6.3	77.9	53.9		0.00276884
HMF	Wheat		4	155 (−1)	11 (−1)	0.6 (+1)	150 (+1)	34.7	0.61	24	52.1	35.5		0.00456484
HMF	Wheat		5	155 (−1)	31 (+1)	1.6 (−1)	60 (−1)	4.8	0.55	6.6	90.2	54		0.00411584
HMF	Wheat		6	155 (−1)	31 (+1)	0.6 (+1)	60 (−1)	46.9	1.27	43.7	10.6	33.4		0.00950385
HMF	Wheat		7	155 (−1)	31 (+1)	1.6 (−1)	150 (+1)	6.3	0.56	7.4	99.1	55.4		0.00419068
HMF	Wheat		8	155 (−1)	31 (+1)	0.6 (+1)	150 (+1)	51.3	1.38	40.2	5.9	26.7		0.010327
HMF	Wheat		9	185 (+1)	11 (−1)	1.6 (−1)	60 (−1)	21.4	1.12	19	70.8	46		0.00838135
HMF	Wheat		10	185 (+1)	11 (−1)	0.6 (+1)	60 (−1)	33.9	0.54	8.8	0	18.3		0.00404101
HMF	Wheat		11	185 (+1)	11 (−1)	1.6 (−1)	150 (+1)	31.1	1.39	23.9	56.4	45.8		0.0104019
HMF	Wheat		12	185 (+1)	11 (−1)	0.6 (+1)	150 (+1)	40.7	0.35	2.5	0.4	13		0.00261917
HMF	Wheat		13	185 (+1)	31 (+1)	1.6 (−1)	60 (−1)	39.9	2.29	38.3	28.2	38		0.0171369
HMF	Wheat		14	185 (+1)	31 (+1)	0.6 (+1)	60 (−1)	23.8	0	0	4.1	21.9		0
HMF	Wheat		15	185 (+1)	31 (+1)	1.6 (−1)	150 (+1)	38.3	2.09	34.3	23.4	40.3		0.0156402
HMF	Wheat		16	185 (+1)	31 (+1)	0.6 (+1)	150 (+1)	22.1	0	0	10.6	16.3		0
HMF	Wheat		17	140 (−2)	21 (0)	1.1 (0)	105 (0)	3.3	0.48	6.1	93.9	51.1		0.00359201
HMF	Wheat		18	200 (+2)	21 (0)	1.1 (0)	105 (0)	37.9	0.45	1.1	5	17.9		0.00336751
HMF	Wheat		19	170 (0)	1 (−2)	1.1 (0)	105 (0)	4.8	0.65	6.9	97.1	53.8		0.00486418
HMF	Wheat		20	170 (0)	41 (+2)	1.1 (0)	105 (0)	40.8	1.61	36.9	18.9	37		0.0120482
HMF	Wheat		21	170 (0)	21 (0)	1.1 (0)	15 (−2)	21.9	0.89	17.8	71.6	52.2		0.00666018
HMF	Wheat		22	170 (0)	21 (0)	1.1 (0)	195 (+2)	32.9	1.1	20.4	26.2	36.2		0.00823168
HMF	Wheat		23	170 (0)	21 (0)	2.1 (−2)	105 (0)	2.4	0.38	3.9	78.6	52.4		0.00284367
HMF	Wheat		24	170 (0)	21 (0)	0.1 (+2)	105 (0)	15	0	0	5	17.2		0
HMF	Wheat		25	170 (0)	21 (0)	1.1 (0)	105 (0)	33.4	1.11	28.1	36.4	41.8		0.00830652
HMF	Wheat		26	170 (0)	21 (0)	1.1 (0)	105 (0)	35.2	1.22	30.1	38.4	40.1		0.00912969
HMF	Wheat		27	170 (0)	21 (0)	1.1 (0)	105 (0)	41.9	1.43	33.1	30	39.1		0.0107012
HMF	Wheat		28	170 (0)	21 (0)	1.1 (0)	105 (0)	38.6	1.23	30.7	37.8	36.1		0.00920452
HMF	Wheat							MAX	2.29
HMF	Wheat							MIN	0
HMF	Wheat		where the yields of furfural and HMF were expressed as a “g furan/100 g pentose content (xylan + arabinose) or hexose content (glucan + galactose + mannose) of straw on a dry weight basis”
HMF	Wheat
HMF	Wheat	Ref 2	https://www.sciencedirect.com/science/article/pii/S0045653521033014
HMF	Wheat		Synthesis of 5-hydroxymethylfurfural from glucose, fructose, cellulose and agricultural wastes over sulfur-doped peanut shell catalysts in ionic liquid - ScienceDirect
HMF	Wheat		Biomass	Reaction temperature (°C)	Reaction time (min)	Substrate loading (mg)	Catalyst	Solvent Media	HMF yield (wt%)	Reference	HMF yield (g/g)
HMF	Wheat		Peanut shell	150	60	100	150 mg PSC-5	2 g [emim]Cl- 1 mL ChCl/DMSO (1:10)	3.9	This study
HMF	Wheat		Water hyacinth	150	60	100	150 mg PSC-5	2 g [emim]Cl- 1 mL ChCl/DMSO (1:10)	1.1	This study
HMF	Wheat		Wheat straw	150	60	100	150 mg PSC-5	2 g [emim]Cl- 1 mL ChCl/DMSO (1:10)	4.5	This study	0.045
HMF	Wheat
HMF	Wheat	theoretical	HMF formation reactions (i.e., glucan hydrolysis, glucose isomerization, and fructose dehydration)
HMF	Wheat		C6H12O6 (Fructose) → C5H4O2CHO (Furfural) + 2H2O.
HMF	Wheat		180	126
HMF	Wheat		theoretical yield g/g fructose+glucose	0.7
HMF	Wheat		fructose+glucose in wheat %	70.7767
HMF	Wheat		theoretical yield g/ g wheat	0.495437
HMF	Wheat
HMF	Wheat
HMF	Wheat
HMF	Wheat Bran	theoretical	HMF formation reactions (i.e., glucan hydrolysis, glucose isomerization, and fructose dehydration)
HMF	Wheat Bran		C6H12O6 (Fructose) → C5H4O2CHO (Furfural) + 2H2O.
HMF	Wheat Bran		180	126
HMF	Wheat Bran		theoretical yield g/g fructose+glucose	0.7
HMF	Wheat Bran		fructose+glucose in wheat bran %	34.8356
HMF	Wheat Bran		theoretical yield g/ g wheat bran	0.243849
HMF	Wheat germ	theoretical	HMF formation reactions (i.e., glucan hydrolysis, glucose isomerization, and fructose dehydration)
HMF	Wheat germ		C6H12O6 (Fructose) → C5H4O2CHO (Furfural) + 2H2O.
HMF	Wheat germ		180	126
HMF	Wheat germ		theoretical yield g/g fructose+glucose	0.7
HMF	Wheat germ		fructose+glucose in wheat germ %	41.8
HMF	Wheat germ		theoretical yield g/ g wheat germ	0.2926
HMF	Wheat germ
FDCA	Wheat	theoretical	https://www.researchgate.net/figure/Theoretical-and-Overall-Yield-for-the-Conversion-of-Pure-Sugars-to-Ethylene-via-Ethanol_tbl6_259752935
FDCA	Wheat		Chemocatalytic Processes for the Production of Bio-Based Chemicals from Carbohydrates
FDCA	Wheat		theoretical yield FDCA from sugar g/g	0.867
FDCA	Wheat		fru+glu in wheat %	70.7767
FDCA	Wheat		theoretical yield FDCA from wheat g/g	0.613634
FDCA	Wheat
FDCA	Wheat Bran	theoretical	https://www.researchgate.net/figure/Theoretical-and-Overall-Yield-for-the-Conversion-of-Pure-Sugars-to-Ethylene-via-Ethanol_tbl6_259752935
FDCA	Wheat Bran		Chemocatalytic Processes for the Production of Bio-Based Chemicals from Carbohydrates
FDCA	Wheat Bran		theoretical yield FDCA from sugar g/g	0.867
FDCA	Wheat Bran		fru+glu in wheat bran %	34.8356
FDCA	Wheat Bran		theoretical yield FDCA from wheat bran g/g	0.302024
FDCA	Wheat Bran
FDCA	Wheat germ	theoretical	https://www.researchgate.net/figure/Theoretical-and-Overall-Yield-for-the-Conversion-of-Pure-Sugars-to-Ethylene-via-Ethanol_tbl6_259752935
FDCA	Wheat germ		Chemocatalytic Processes for the Production of Bio-Based Chemicals from Carbohydrates
FDCA	Wheat germ		theoretical yield FDCA from sugar g/g	0.867
FDCA	Wheat germ		fru+glu in wheat germ %	41.8
FDCA	Wheat germ		theoretical yield FDCA from wheat germ g/g	0.362406
Isoprene	Wheat	theoretical	glucose in Wheat	70.7767
Isoprene	Wheat		yield (isoprene/Wheat)	0.12032
Isoprene	Wheat
Isoprene	Wheat Bran	theoretical	glucose in Wheat Bran	34.8356
Isoprene	Wheat Bran		yield (isoprene/Wheat bran)	0.0592204
Isoprene	Wheat Bran
Isoprene	Wheat germ	theoretical	glucose in Wheat Bran	41.8
Isoprene	Wheat germ		yield (isoprene/Wheat germ)	0.07106
Isoprene	Wheat germ
Succinic Acid	Wheat	Ref 1	https://biotechnologyforbiofuels.biomedcentral.com/articles/10.1186/s13068-020-01850-5				Fig 5
Succinic Acid	Wheat		Metabolic engineering of Aspergillus niger via ribonucleoprotein-based CRISPR–Cas9 system for succinic acid production from renewable biomass | Biotechnology for Biofuels and Bioproducts | Full Text (biomedcentral.com)
Succinic Acid	Wheat
Succinic Acid	Wheat					Estimated from figure, using proportions
Succinic Acid	Wheat					Yield (g/g)
Succinic Acid	Wheat					0.145
Succinic Acid	Wheat
Succinic Acid	Wheat
Succinic Acid	Wheat
Succinic Acid	Wheat
Succinic Acid	Wheat
Succinic Acid	Wheat
Succinic Acid	Wheat
Succinic Acid	Wheat
Succinic Acid	Wheat
Succinic Acid	Wheat
Succinic Acid	Wheat
Succinic Acid	Wheat
Succinic Acid	Wheat
Succinic Acid	Wheat
Succinic Acid	Wheat
Succinic Acid	Wheat	Ref 2	https://www.sciencedirect.com/science/article/pii/S0960852408010225
Succinic Acid	Wheat		Fermentative production of succinic acid from straw hydrolysate by Actinobacillus succinogenes - ScienceDirect
Succinic Acid	Wheat		Agricultural straws	Residual reducing sugar (g l−1)	Succinic acid (g l−1)	Acetic acid and Formic acid (g l−1)	Succinic yield (%)	Sugar utilization (%)	Succinic Yield (% TS)	TS %	Succinic acid yield (g/g)
Succinic Acid	Wheat		Corn straw	3.4 ± 0.4	33.70 ± 0.3	5.3 ± 0.2	81.0 ± 1.5	92.4 ± 0.9
Succinic Acid	Wheat		Corn core	9.0 ± 0.2	32.07 ± 0.8	3.53 ± 0.3	89.1 ± 2.7	80.0 ± 0.4
Succinic Acid	Wheat		Rice straw	16.9 ± 0.6	17.64 ± 0.3	2.24 ± 0.1	62.8 ± 2.4	62.4 ± 1.3
Succinic Acid	Wheat		Wheat straw	19.4 ± 0.5	18.96 ± 0.2	2.07 ± 0.1	74.1 ± 2.2	56.9 ± 1.1	74.1	74.8335	0.554516
Succinic Acid	Wheat		Succinic acid yield was defined as the amount of succinic acid produced from 1 g sugar consumed, and was expressed as a percentage
Succinic Acid	Wheat
Succinic Acid	Wheat	Ref 3	https://www.sciencedirect.com/science/article/pii/S0960852408002022
Succinic Acid	Wheat		A wheat biorefining strategy based on solid-state fermentation for fermentative production of succinic acid - ScienceDirect
Succinic Acid	Wheat		Fermentation media	Fermentation results
Succinic Acid	Wheat			Succinic acid concentration (g l−1)	Succinic acid productivity (g l−1 h−1)	Yieldd (g g−1)	Yield (g/g glucose)	Glucose in wheat %)	Yield (g/g)	average
Succinic Acid	Wheat		Semi-defined mediuma	27.9	0.56	0.62	0.62	70.7767	0.438815	0.464093
Succinic Acid	Wheat		FH and FAa	15.9	0.31	0.47	0.47		0.33265
Succinic Acid	Wheat		GFFHb and GH	23.5 ± 1.2	0.97 ± 0.06	0.60 ± 0.05	0.6		0.42466
Succinic Acid	Wheat		GFFHb, GH and 2 g l−1 MgCO3	31.8 ± 2.0	1.30 ± 0.11	0.66 ± 0.01	0.66		0.467126
Succinic Acid	Wheat		GFFHb, GH and 30 g l−1 MgCO3	36.1 ± 1.1	1.53 ± 0.08	0.70 ± 0.02	0.7		0.495437
Succinic Acid	Wheat		GFFHb, GH and 50 g l−1 MgCO3	37.7 ± 0.8	1.57 ± 0.03	0.73 ± 0.02	0.73		0.51667
Succinic Acid	Wheat		GFFHc, GH and 30 g l−1 MgCO3	64.2 ± 1.0	1.19 ± 0.05	0.81 ± 0.05	0.81		0.573291
Succinic Acid	Wheat					MAX	0.81
Succinic Acid	Wheat					MIN	0.6
Succinic Acid	Wheat
Succinic Acid	Wheat	Ref 4	https://link.springer.com/article/10.1007/s00253-010-2726-9
Succinic Acid	Wheat		Succinic acid production from orange peel and wheat straw by batch fermentations of Fibrobacter succinogenes S85 | Applied Microbiology and Biotechnology (springer.com)
Succinic Acid	Wheat
Succinic Acid	Wheat					EST from figure
Succinic Acid	Wheat					Yieldd (g g−1)
Succinic Acid	Wheat					0.1
Succinic Acid	Wheat
Succinic Acid	Wheat
Succinic Acid	Wheat
Succinic Acid	Wheat
Succinic Acid	Wheat
Succinic Acid	Wheat
Succinic Acid	Wheat
Succinic Acid	Wheat
Succinic Acid	Wheat
Succinic Acid	Wheat
Succinic Acid	Wheat
Succinic Acid	Wheat
Succinic Acid	Wheat
Succinic Acid	Wheat	Ref 5	https://www.sciencedirect.com/science/article/pii/S0168165609002533?via%3Dihub#tbl3
Succinic Acid	Wheat		Cereal-based biorefinery development: Utilisation of wheat milling by-products for the production of succinic acid
Succinic Acid	Wheat		Table 3. Succinic acid fermentations of A. succinogenes on various media produced from wheat flour milling by-products.
Succinic Acid	Wheat		Batch number	1	2	3	4
Succinic Acid	Wheat		Initial content of fermentation media
Succinic Acid	Wheat		Glucose (g/L)	76.3	83.2	85.9	53.5
Succinic Acid	Wheat		Maltose (g/L)	24.8	20	20.7	11.1
Succinic Acid	Wheat		Total sugar (g/L)	101.1	103.2	102.8	64.6
Succinic Acid	Wheat		Yeast extract (g/L)	0	4	7	2.5
Succinic Acid	Wheat		Inoculum volume (%, v/v)	7.4	7.4	11.4	20.9
Succinic Acid	Wheat
Succinic Acid	Wheat		Fermentation outcome
Succinic Acid	Wheat		Succinic acid (g/L)	50.6	54.8	59.3	62.1
Succinic Acid	Wheat		Productivity (g/L h)	1.04	1.06	0.93	0.91
Succinic Acid	Wheat		Yielda (g/g glucose equivalent)	0.73	0.7	0.84	1.02	0.8225
Succinic Acid	Wheat		Glucose consumption (g/L)	52.6	62.5	60.4	52.2
Succinic Acid	Wheat		Glucose utilisationb (g/g)	0.69	0.75	0.7	0.98
Succinic Acid	Wheat		Maltose consumption (g/L)	16.7	14.8	9.8	8.5
Succinic Acid	Wheat		Maltose utilisationb (g/g)	0.67	0.74	0.47	0.77
Succinic Acid	Wheat		Total sugar consumption (g/L)	69.3	77.3	70.2	60.7
Succinic Acid	Wheat		Total sugar utilisation (g/g)	0.69	0.75	0.68	0.94
Succinic Acid	Wheat		a
Succinic Acid	Wheat		Yield was calculated by dividing the amount of succinic acid produced by the total amount of sugar consumed (in terms of glucose equivalent) throughout the fermentation.
Succinic Acid	Wheat		b
Succinic Acid	Wheat		Sugar utilisation was calculated by dividing the amount of sugar consumed by the initial sugar concentration.
Succinic Acid	Wheat
Succinic Acid	Wheat		yield (g/g glu eq)	0.8225
Succinic Acid	Wheat		glu in wheat	70.7767
Succinic Acid	Wheat		yield g / g wheat	0.582138
Succinic Acid
Succinic Acid	wheat bran	ref 1	Production of succinic acid and lactic acid by Corynebacterium crenatum under anaerobic conditions
Succinic Acid	wheat bran		https://link.springer.com/article/10.1007/s13213-012-0441-8
Succinic Acid	wheat bran		The yield of succinic acid and
Succinic Acid	wheat bran		lactic acid was 0.27 g/g and 0.62 g/g, respectively (g/g,
Succinic Acid	wheat bran		grams acid formed/grams glucose utilized) (Table 1).
Succinic Acid	wheat bran
Succinic Acid	wheat bran		yield	0.27
Succinic Acid	wheat bran		glu in wheat bran	34.8356
Succinic Acid	wheat bran		yield g / g wheat	0.094056
Succinic Acid	wheat bran
Succinic Acid	wheat bran	ref 2	https://www.sciencedirect.com/science/article/pii/S0168165609002533?via%3Dihub#tbl3
Succinic Acid	wheat bran		Cereal-based biorefinery development: Utilisation of wheat milling by-products for the production of succinic acid
Succinic Acid	wheat bran		Table 3. Succinic acid fermentations of A. succinogenes on various media produced from wheat flour milling by-products.
Succinic Acid	wheat bran		Batch number	1	2	3	4
Succinic Acid	wheat bran		Initial content of fermentation media
Succinic Acid	wheat bran		Glucose (g/L)	76.3	83.2	85.9	53.5
Succinic Acid	wheat bran		Maltose (g/L)	24.8	20	20.7	11.1
Succinic Acid	wheat bran		Total sugar (g/L)	101.1	103.2	102.8	64.6
Succinic Acid	wheat bran		Yeast extract (g/L)	0	4	7	2.5
Succinic Acid	wheat bran		Inoculum volume (%, v/v)	7.4	7.4	11.4	20.9
Succinic Acid	wheat bran
Succinic Acid	wheat bran		Fermentation outcome
Succinic Acid	wheat bran		Succinic acid (g/L)	50.6	54.8	59.3	62.1
Succinic Acid	wheat bran		Productivity (g/L h)	1.04	1.06	0.93	0.91
Succinic Acid	wheat bran		Yielda (g/g glucose equivalent)	0.73	0.7	0.84	1.02	0.8225
Succinic Acid	wheat bran		Glucose consumption (g/L)	52.6	62.5	60.4	52.2
Succinic Acid	wheat bran		Glucose utilisationb (g/g)	0.69	0.75	0.7	0.98
Succinic Acid	wheat bran		Maltose consumption (g/L)	16.7	14.8	9.8	8.5
Succinic Acid	wheat bran		Maltose utilisationb (g/g)	0.67	0.74	0.47	0.77
Succinic Acid	wheat bran		Total sugar consumption (g/L)	69.3	77.3	70.2	60.7
Succinic Acid	wheat bran		Total sugar utilisation (g/g)	0.69	0.75	0.68	0.94
Succinic Acid	wheat bran		a
Succinic Acid	wheat bran		Yield was calculated by dividing the amount of succinic acid produced by the total amount of sugar consumed (in terms of glucose equivalent) throughout the fermentation.
Succinic Acid	wheat bran		b
Succinic Acid	wheat bran		Sugar utilisation was calculated by dividing the amount of sugar consumed by the initial sugar concentration.
Succinic Acid	wheat bran
Succinic Acid	wheat bran		yield (g/g glu eq)	0.8225
Succinic Acid	wheat bran		glu in wheat bran	34.8356
Succinic Acid	wheat bran		yield g / g wheat bran	0.286522
Succinic Acid	wheat bran
Succinic Acid
Succinic Acid	wheat germ	theoretical	yield g/g sugar	0.667143
Succinic Acid	wheat germ		glu+fru+xyl in wheat germ	50.1356
Succinic Acid	wheat germ		succinate yield g/g wheat germ	0.334476
3HP	wheat	theoretical	yield g/g sugar	0.2365
3HP			glucose in wheat	70.7767
3HP			3-HP yield g/g wheat	0.167387
3HP
3HP	wheat bran	theoretical	yield g/g sugar	0.2365
3HP			glucose in wheat bran	34.8356
3HP			3-HP yield g/g wheat bran	0.0823861
3HP
3HP	wheat germ	theoretical	yield g/g sugar	0.2365
3HP			glucose in wheat germ	41.8
3HP			3-HP yield g/g wheat germ	0.098857
3HP
LEVULINIC ACID	wheat	ref 1	https://www.sciencedirect.com/science/article/pii/S0960852406005815#tbl4
LEVULINIC ACID	wheat		Levulinic acid production from wheat straw - ScienceDirect (wur.nl)
LEVULINIC ACID	wheat		Table 6. Literature values of yield of levulinic acid for various substrates
LEVULINIC ACID	wheat		Raw material	Cellulose content (%)	Investigator	Yield based on weight of raw material (%)	Yield based on theoretical yield (%)
LEVULINIC ACID	wheat		Starch		Cha and Hanna (2002)	47.5	66.4
LEVULINIC ACID	wheat		Sorghum grain	73.8	Fang and Hanna (2002)	32.6	45.6
LEVULINIC ACID	wheat		Paper	85	Farone and Cuzens (2000)	50.3	59.8
LEVULINIC ACID	wheat		Paper sludge	80	Fitzpatreck (1995)	62	>70
LEVULINIC ACID	wheat		Wheat straw	40.4	This work	19.9	68.8
LEVULINIC ACID	wheat
LEVULINIC ACID	wheat		yield g/g raw material %	19.9	yield g/g raw material	0.199
LEVULINIC ACID	wheat
LEVULINIC ACID	wheat	ref 2	Levulinic Acid Production from waste biomass
LEVULINIC ACID	wheat		https://www.researchgate.net/publication/258993284_Levulinic_Acid_Production_from_waste_biomass
LEVULINIC ACID	wheat		yield (wt%)	19.3
LEVULINIC ACID	wheat			20.6
LEVULINIC ACID	wheat			21.7
LEVULINIC ACID	wheat		avrg g/g	0.205333
LEVULINIC ACID
LEVULINIC ACID	wheat bran	theoretical	Theoretical yield (g/g hexos)	0.521033
LEVULINIC ACID	wheat bran		glu+fru in wheat bran (g/100g)	34.8356
LEVULINIC ACID	wheat bran		Theoretical yield (g/g wheat bran)	0.181505
LEVULINIC ACID
LEVULINIC ACID	wheat germ	theoretical	Theoretical yield (g/g hexos)	0.521033
LEVULINIC ACID	wheat germ		glu+fru in wheat germ (g/100g)	41.8
LEVULINIC ACID	wheat germ		Theoretical yield (g/g wheat germ)	0.217792
lactic acid	wheat	ref 1	Lactic acid production from wheat straw hemicellulose hydrolysate by Lactobacillus pentosus and Lactobacillus brevis
lactic acid	wheat		https://www.sciencedirect.com/science/article/pii/S0960852401001353
lactic acid	wheat
lactic acid	wheat		Table 2. Lactic acid yields from fermentation of treated HH and MRS model medium by Lb. pentosus and Lb.brevis
lactic acid	wheat		Medium	Yield
lactic acid	wheat			Lb. pentosus	Lb. brevis
lactic acid	wheat		Enzymatic treated HH	0.88	0.51
lactic acid	wheat		Acidic treated HH	0.9	0.61
lactic acid	wheat		MRS + 20 g/l glucose	0.93	0.89
lactic acid	wheat		MRS + 20 g/l xylose	1.13	0.92
lactic acid	wheat		MRS + 10 g/l glucose + 10 g/l xylose	0.69	0.56
lactic acid	wheat
lactic acid	wheat		avrg (of the theoretical maximum yield)	0.725
lactic acid	wheat		theroetical yield	1	mol lactic acid produced/mol xylose
lactic acid	wheat			2	mol lactic acid produced/mol glucose consumed
lactic acid	wheat		glucose %	70.7767
lactic acid	wheat		xylose %	4.05682
lactic acid	wheat
lactic acid	wheat		thoeretical yield g/100 g wheat	73.2108
lactic acid	wheat		yield g/ g wheat	0.530778
lactic acid	wheat
lactic acid	wheat	ref 2	Kinetic modeling of hydrogen and L-lactic acid production by Thermotoga neapolitana via capnophilic lactic fermentation of starch
lactic acid	wheat		https://www.sciencedirect.com/science/article/pii/S0960852421004661
lactic acid	wheat		Table 4. Potato and wheat starch (30.80 mM glucose equivalent) fermentation under CLF conditions by T. neapolitana in a CSTR system for 48 h.
lactic acid	wheat		Test	NaCl (g/L)	Substrate consumed (mM glucose eq.)	AA (mM)	LA (mM)	ALA (mM)	H2 (mol/mol glucose eq.)	AA (mol/mol glucose eq.)	LA (mol/mol glucose eq.)
lactic acid	wheat		PS10-R1	10	26.84 (±1.25)	27.84 (±4.56)	22.53 (±10.59)	2.03 (±0.06)	3.34 (±0.17)	1.04 (±0.21)	0.88 (±0.39)
lactic acid	wheat		PS35-R2	35	26.03 (±0.26)	19.89 (±1.08)	26.32 (±1.03)	1.64 (±0.03)	2.20 (±0.26)	0.76 (±0.03)	1.01 (±0.05)
lactic acid	wheat		WS10-R3	10	26.29 (±0.16)	38.05 (±2.22)	8.26 (±2.83)	1.58 (±0.04)	2.79 (±0.17)	1.45 (±0.09)	0.33 (±0.11)
lactic acid	wheat		Notes: PS10-R1 = potato starch with 10 g/L NaCl; PS35-R2 = potato starch with 35 g/L NaCl; WS10-R3 = wheat starch with 10 g/L NaCl; AA = acetic acid; LA = L-lactic acid; and ALA = alanine. The results are expressed as mean (±standard error).
lactic acid	wheat
lactic acid	wheat		LA (mol/mol glucose eq.)	0.88
lactic acid	wheat			1.01
lactic acid	wheat			0.33
lactic acid	wheat		avrg	0.74
lactic acid	wheat		yield g/g glucose	0.37
lactic acid	wheat		glucose in wheat	70.7767
lactic acid	wheat		yield g/g wheat	0.261874
lactic acid	wheat
lactic acid	wheat	ref 3	https://pu.edu.pk/images/journal/zology/PDF-FILES/7_36_1_21.pdf
lactic acid	wheat		Evolutionary Adaptation of Bacillus subtilis OCS SH-2 in Wheat Straw Hydrolysate for Bioethanol and Lactic Acid Production
lactic acid	wheat
lactic acid	wheat
lactic acid	wheat
lactic acid	wheat
lactic acid	wheat		yield (g/g glucose)	0.7562
lactic acid	wheat			0.7236
lactic acid	wheat			0.7335
lactic acid	wheat			0.7644
lactic acid	wheat		avrg	0.744425
lactic acid	wheat		glucose in wheat	70.7767
lactic acid	wheat		yield g/g wheat	0.526879
lactic acid	wheat
lactic acid	wheat	ref 4	https://www.sciencedirect.com/science/article/pii/S0960852420311275#t0010
lactic acid	wheat		Sustainable Biotechnology: Sources of Renewable EnergyOne-pot process for lactic acid production from wheat straw by an adapted Bacillus coagulans and identification of genes related to hydrolysate-tolerance
lactic acid	wheat		this study	0.44	g/g from raw wheat straw
lactic acid	wheat
lactic acid	wheat
lactic acid	wheat
lactic acid	wheat	ref 5	(Maas et al., 2008)	0.43	g/g from raw wheat straw
lactic acid	wheat
lactic acid	wheat	ref 4	https://www.sciencedirect.com/science/article/pii/S0960852400000572?via%3Dihub
lactic acid	wheat		An economic evaluation of the fermentative production of lactic acid from wheat flour
lactic acid	wheat		Table 3. The lactic acid production cost at different wheat flour concentrations for Process 1
lactic acid	wheat		Glucose concentration (g/l)	Cost (US$/ kg lactic acida)	Amount of 70% lactic acid produced per unit mass raw material (kg/kg)	Amount of 70% lactic acid produced per unit mass raw material (kg/kg)
lactic acid	wheat		50	1.1	0.64	0.914286
lactic acid	wheat		70	1.06	0.58	0.828571
lactic acid	wheat		90	1.08	0.54	0.771429
lactic acid	wheat		130	1.1	0.47	0.671429
lactic acid	wheat		180	1.15	0.39	0.557143
lactic acid	wheat		a
lactic acid	wheat		Lactic acid with a concentration of 70%.
lactic acid	wheat
lactic acid	wheat		yield g/g glucose	0.748571
lactic acid	wheat		glucose in wheat	70.7767
lactic acid	wheat		yield g/g wheat	0.529814
lactic acid	wheat
lactic acid	wheat	ref 5	Modeling the continuous lactic acid production process from wheat flour
lactic acid	wheat		https://link.springer.com/article/10.1007/s00253-015-6949-7
lactic acid	wheat
lactic acid	wheat		able 3 Identified values of the model parameters
lactic acid	wheat		From: Modeling the continuous lactic acid production process from wheat flour
lactic acid	wheat		Parameter	Identified value
lactic acid	wheat		μmax (h−1)	0.28
lactic acid	wheat		P max (g L−1)	98.6
lactic acid	wheat		Y X (g cell g−1 glucose)	0.053
lactic acid	wheat		Y P (g product g−1 cell)	0.82
lactic acid	wheat		K M (h−1)	0.035
lactic acid	wheat		K S (g L−1)	0.5 (fixed from literature)
lactic acid	wheat		n	3 (fixed after several trials)
lactic acid	wheat
lactic acid	wheat		yield g product/g glucose	0.04346
lactic acid	wheat		glucose in wheat	70.7767
lactic acid	wheat		yield g/g wheat	0.0307595	abnormal value
lactic acid	wheat
lactic acid	wheat
lactic acid	wheat	ref 6	One-pot bioprocess for lactic acid production from lignocellulosic agro-wastes by using ionic liquid stable Lactobacillus brevis
lactic acid	wheat		https://www.scopus.com/record/display.uri?eid=2-s2.0-85039148362&origin=inward&txGid=8765cb3b2451f1a00f4c1b7e2e9b1e5d
lactic acid	wheat
lactic acid	wheat		Grewal and Khare (2018)	0.49	g/g from raw wheat straw
lactic acid	wheat
lactic acid	wheat	ref 7 & ref 8	(Aulitto et al., 2019, Zhang et al., 2014)	0.27	g/g from raw wheat straw
lactic acid	wheat		(Aulitto et al., 2019, Zhang et al., 2014)	0.46	g/g from raw wheat straw
lactic acid	wheat			0.365	g/g from raw wheat straw
lactic acid	wheat bran
lactic acid	wheat bran	ref 1	Wheat bran an inexpensive substrate for production of Lactic acid in solid state fermentation by Lactobacillus amylophilus GV6 - Optimization of fermentation conditions (researchgate.net)
lactic acid	wheat bran		https://nopr.niscpr.res.in/bitstream/123456789/26284/1/JSIR%2062%285%29%20453-456.pdf
lactic acid	wheat bran		0.1815	g LA/g bran
lactic acid	wheat bran	ref 2	Fermentative production of l-lactic acid from hydrolysate of wheat bran by Lactobacillus rhamnosus - ScienceDirect (wur.nl)		https://www.sciencedirect.com/science/article/pii/S1369703X09003118#tbl3
lactic acid	wheat bran		Table 3. Fermentation efficiency of different nutrients.
lactic acid	wheat bran		N source (g/l)	Fermentation time (h)
lactic acid	wheat bran		15 YEb	32	l-Lactic acid (g/l)	l-Lactic acid yielda (g/g)	l-Lactic acid productivity (g/l/h)
lactic acid	wheat bran		25 WBc	81	85	0.95	2.46
lactic acid	wheat bran		40 WB	59	72	0.8	0.89
lactic acid	wheat bran		56 WB	39	74	0.85	1.25
lactic acid	wheat bran		30 CSLd	88	80	0.94	2.05
lactic acid	wheat bran		45 CSL	65	80	0.9	0.91
lactic acid	wheat bran		60 CSL	47.5	79	0.88	1.22
lactic acid	wheat bran		25 WB + 30 CSL	33.5	80	0.87	1.68
lactic acid	wheat bran		25 WBHe	34	70	0.91	2.09
lactic acid	wheat bran		40 WBH	26	80	0.99	2.35
lactic acid	wheat bran		56 WBH	20	79	0.98	3.04
lactic acid	wheat bran		25 WBH + 30 CSL	20	74	0.99	3.7
lactic acid	wheat bran				75	0.99	3.75
lactic acid	wheat bran		avrg g l-lactic acid produced/g glucose consumed	0.866667
lactic acid	wheat bran		glucose in whear bran	34.8356
lactic acid	wheat bran		yield g LA/g WB	0.301908
lactic acid	wheat bran
lactic acid	wheat bran	ref 3	Direct fermentation of starch to L(+) lactic acid in SSF by Lactobacillus amylophilus GV6 using wheat bran as support and substrate: Medium optimization using RSM
lactic acid	wheat bran		https://www.sciencedirect.com/science/article/pii/S0032959204000834
lactic acid	wheat bran		Under these conditions a maximum of 36 g of lactic acid was produced per 100 g of wheat bran having 54 g of starch.
lactic acid	wheat bran		0.36
lactic acid	wheat bran
lactic acid	wheat bran	ref 4	Single step fermentation of starch to l(+) lactic acid by Lactobacillus amylophilus GV6 in SSF using inexpensive nitrogen sources to replace peptone and yeast extract – Optimization by RSM
lactic acid	wheat bran		https://www.sciencedirect.com/science/article/pii/S1359511305003181#tbl3
lactic acid	wheat bran		The maximum lactic acid production of 46.3 g/100 g wheat bran
lactic acid	wheat bran		0.463
lactic acid	wheat bran
lactic acid	wheat bran	ref 5	Effect of different carbon sources on l(+) -lactic acid production by Rhizopus oryzae
lactic acid	wheat bran		https://www.sciencedirect.com/science/article/pii/S1369703X04000920?via%3Dihub#TBL1
lactic acid	wheat bran		n that case, the lactic acid yield was approximately 60% by weight based on the amount of glucose consumed.
lactic acid	wheat bran		yield g/g glucose	0.6
lactic acid	wheat bran		glucose in wheat bran	34.8356
lactic acid	wheat bran		yield g/g wheat bran	0.209013
lactic acid
lactic acid	wheat germ	theoretical	https://link.springer.com/article/10.1007/s10570-019-02571-1
lactic acid	wheat germ		Bioprocessing of rice husk into monosaccharides and the fermentative production of bioethanol and lactate
lactic acid	wheat germ		YLA lactic acid yield expressed as percentage of theoretical lactic acid yield (0.76 g lactic acid per g sugar)
lactic acid	wheat germ		theoretical yield (g lactic acid per g sugar)	0.76
lactic acid	wheat germ		sugar from wheat germ g/g	41.8
lactic acid	wheat germ		theoretical yield (g lactic acid per g wheat germ )	0.31768
sorbitol	wheat	theoretical	https://link.springer.com/article/10.1007/s00253-002-1046-0
sorbitol	wheat		The biotechnological production of sorbitol
sorbitol	wheat		avrg conversion of glucose and fructose %	95.2
sorbitol	wheat		yield g/g glucose and fructose	0.962578
sorbitol	wheat		glu+ fru in wheat %	70.7767
sorbitol	wheat		yield g/g wheat	0.68128
sorbitol	wheat
sorbitol	wheat bran	theoretical	https://link.springer.com/article/10.1007/s00253-002-1046-0
sorbitol	wheat bran		The biotechnological production of sorbitol
sorbitol	wheat bran		avrg conversion of glucose and fructose %	95.2
sorbitol	wheat bran		yield g/g glucose and fructose	0.962578
sorbitol	wheat bran		glu+ fru in wheat bran %	34.8356
sorbitol	wheat bran		yield g/g wheat bran	0.335319
sorbitol	wheat bran
sorbitol	wheat germ	theoretical	https://link.springer.com/article/10.1007/s00253-002-1046-0
sorbitol	wheat germ		The biotechnological production of sorbitol
sorbitol	wheat germ		avrg conversion of glucose and fructose %	95.2
sorbitol	wheat germ		yield g/g glucose and fructose	0.962578
sorbitol	wheat germ		glu+ fru in wheat germ %	41.8
sorbitol	wheat germ		yield g/g wheat germ	0.402358
xylitol	wheat
xylitol	wheat
xylitol	wheat	ref 1	Prospective evaluation of xylitol production using Dabaryomyces hansenii var hansenii, Pachysolen tannophilus, and Candida guillermondii with sustainable agricultural residues
xylitol	wheat		https://link.springer.com/article/10.1007/s13399-020-01221-y
xylitol	wheat		Table 11 Model parameters for xylitol production from hemicelluloses hydrolyzate of wheat straw using Debaryomyces hansenii var hansenii, Pachysolen tannophilus, and Candida guilluirmondii
xylitol	wheat		From: Prospective evaluation of xylitol production using Dabaryomyces hansenii var hansenii, Pachysolen tannophilus, and Candida guillermondii with sustainable agricultural residues
xylitol	wheat		Microorganism	Wheat straw hemicelluloses hydrolysate								Xylitol yield, YPS (g/g)
xylitol	wheat			Logistic model			Substrate utilization kinetics		Luedeking-Piret model			CCD design matrix from RSM
xylitol	wheat			k (h−1)	R2	Error (%)	YXS	Error (%)	αLP	βLP	Error (%)	Experimental	predicted
xylitol	wheat		Debaryomyces hansenii var hansenii	0.091	0.995	3.37	0.029	6.03	21.2	0.313	7.42	0.75	0.74
xylitol	wheat		Pachysolen tannophilus	0.098	0.987	5.09	0.03	6.02	23.3	0.284	7.99	0.78	0.75
xylitol	wheat		Candida guilluirmondii	0.089	0.991	3.98	0.026	4.05	20.3	0.243	7.12	0.71	0.69
xylitol	wheat		yield g/g xylose	0.75
xylitol	wheat			0.78
xylitol	wheat			0.71
xylitol	wheat		avrg	0.746667
xylitol	wheat		xylose in wheat	4.05682
xylitol	wheat		yield g/g wheat	0.0302909
xylitol	wheat	ref 2	0.59	g/g xylose	0.260789					Xylitol production from wheat straw hemicellulosic hydrolysate: hydrolysate detoxification and carbon source used for inoculum preparation - ProQuest
xylitol	wheat	ref 3	0.9	g/g xylose	0.397813					Batch xylitol production from wheat straw hemicellulosic hydrolysate using Candida guilliermondii in a stirred tank reactor - ProQuest
xylitol	wheat	ref 4	0.875	c/c xylose	0.386763					Optimization of parameters for xylitol production by Aspergillus terreus
xylitol	wheat	ref 5	0.88	g/g xylose	0.388973					Xylitol bioproduction from wheat straw: hemicellulose hydrolysis and hydrolyzate fermentation - Canilha - 2006 - Journal of the Science of Food and Agriculture - Wiley Online Library (wur.nl)
xylitol	wheat	ref 6	0.16	g/g wheat straw	0.16					Evaluation of antioxidant activity of dilute acid hydrolysate of wheat straw during xylose production - ScienceDirect (wur.nl)
xylitol	wheat	ref 7	41.88	% xylose	0.185116					Microsoft Word - Y90409_FINAL_Zhuang_LWSL_Hydrol_Wheat_Straw_Hemi_Detox_Xylitol.doc (ncsu.edu)
xylitol	wheat
xylitol	wheat	theoretical	https://www.sciencedirect.com/science/article/pii/S0922338X98800263?casa_token=aLqBeV90biIAAAAA:uqYoRDUYXPdbjyYra-122gWl9FVoabLSx-h_EHf6fDpWVOsKLf0qIS6Sd5kzioR63hHTDi8
xylitol	wheat		Microbial conversion of d-xylose to xylitol
xylitol	wheat		avrg Yx/s (g xylitol/g xylose)	0.485909
xylitol	wheat		xylose in wheat %	4.05682
xylitol	wheat		yield (g xylitol / g wheat )	0.0197124
xylitol	wheat
xylitol	wheat
xylitol	wheat
xylitol	wheat bran	ref 1	https://www.sciencedirect.com/science/article/pii/S0960852421015418?via%3Dihub
xylitol	wheat bran		Xylitol production from plant biomass by Aspergillus niger through metabolic engineering - ScienceDirect (wur.nl)
xylitol	wheat bran		due to low loading concentration, this study will not be used for further analysis.
xylitol	wheat bran
xylitol	wheat bran
xylitol	wheat bran
xylitol	wheat bran
xylitol	wheat bran
xylitol	wheat bran
xylitol	wheat bran
xylitol	wheat bran
xylitol	wheat bran
xylitol	wheat bran
xylitol	wheat bran
xylitol	wheat bran
xylitol	wheat bran
xylitol	wheat bran
xylitol	wheat bran
xylitol	wheat bran
xylitol	wheat bran
xylitol	wheat bran
xylitol	wheat bran
xylitol	wheat bran
xylitol	wheat bran
xylitol	wheat bran
xylitol	wheat bran
xylitol	wheat bran
xylitol	wheat bran
xylitol	wheat bran
xylitol	wheat bran	ref 2	https://www.sciencedirect.com/science/article/pii/S095965262302824X?casa_token=AJVwBlQT4awAAAAA:iBE6Ui5a4rPA9r4mYyLL37VyFgt7coeu9x2puuBiwdn-YedaKrYdNlUSC4CAOSj830Yn6MA#tbl1
xylitol	wheat bran		Life cycle assessment of fermentative xylitol production from wheat bran: A comparative evaluation of sulphuric acid and chemical-free wet air oxidation-based pretreatment - ScienceDirect (wur.nl)
xylitol	wheat bran
xylitol	wheat bran		Table 2. Data inventory of Wet Air Oxidation (WAO) pretreatment-based fermentative xylitol production.
xylitol	wheat bran		WAO pretreatment	Value
xylitol	wheat bran		Input
xylitol	wheat bran		Wheat bran	300 g
xylitol	wheat bran		Water	3 L
xylitol	wheat bran		Electrical energy	6 kWh
xylitol	wheat bran
xylitol	wheat bran		Output
xylitol	wheat bran		Hemicellulose hydrolysate	2.5 L (xylose concentration: 4.33 g/L)
xylitol	wheat bran		Solid pretreated biomass	100 g (dry weight)
xylitol	wheat bran
xylitol	wheat bran		Concentration by forward osmosis membrane
xylitol	wheat bran		Input
xylitol	wheat bran		WAO pretreated hydrolysate	2.5 L
xylitol	wheat bran		MgSO4	50 g
xylitol	wheat bran		Water	1 L
xylitol	wheat bran		Electrical energy	1.5 kWh
xylitol	wheat bran
xylitol	wheat bran		Output
xylitol	wheat bran		Concentrated xylose-rich hydrolysate	0.5 L (xylose concentration:13.75 g/L)
xylitol	wheat bran		MgSO4 draw solution (diluted)	2.7 L
xylitol	wheat bran
xylitol	wheat bran		Fermentation
xylitol	wheat bran		Input
xylitol	wheat bran		Concentrated xylose-rich hydrolysatea	1 L
xylitol	wheat bran		Yeast (Pichia stipitis)	0.05 kg
xylitol	wheat bran		KH2PO4	0.002 kg
xylitol	wheat bran		(NH₄)₂SO₄	0.001 kg
xylitol	wheat bran		Electrical energy	216 kWh
xylitol	wheat bran
xylitol	wheat bran		Output
xylitol	wheat bran		Xylitol rich fermentation broth	1 L (xylitol concentration: 6.134 g/L)
xylitol	wheat bran		a
xylitol	wheat bran		Concentrated hemicellulosic hydrolysate normalized to 1 L for xylitol fermentation.
xylitol	wheat bran
xylitol	wheat bran		yield g xylitol/g wheat bran	0.0204467
xylitol	wheat bran
xylitol	wheat bran
xylitol	wheat bran	ref 3	Optimized Bioconversion of Xylose Derived from Pre-Treated Crop Residues into Xylitol by Using Candida boidinii
xylitol	wheat bran		https://www.mdpi.com/2073-4395/11/1/79
xylitol	wheat bran
xylitol	wheat bran		Table 2. Results of xylitol fermentation during the designed experiments (32) by using Candida boidinii NCAIM Y.01308. (OTR: oxygen transfer rate, IXC: initial xylose concentration).
xylitol	wheat bran		OTR	IXC	Max. Xylitol Yield	Time of Max. Xylitol Yield	Max. Xylitol Productivity	24-h Xylitol Yield	Xylose at Max. Xylitol Yield	Spec. Xylitol Yield at Max. Xylitol Yield	Max. Ethanol
xylitol	wheat bran			(Nominal Values)
xylitol	wheat bran		mmol O2/(L × h)	g/L	%	h	g/(L × h)	%	g/L	g/g	g/L
xylitol	wheat bran		3.1	30	49	24	0.61	49 *	3	0.55	4
xylitol	wheat bran		2.1	30	58	24	0.66	58 *	4.5	0.71	2.7
xylitol	wheat bran		1.1	30	58	48	0.49	41	1.4	0.61	2
xylitol	wheat bran		3.1	55	42	72	0.88	35	0.2	0.43	2
xylitol	wheat bran		2.1	55	50	72	0.88	39	0.5	0.51	6.1
xylitol	wheat bran		2.1	55	48	72	0.91	40	0.4	0.49	5.9
xylitol	wheat bran		2.1	55	49	72	0.92	40	0.6	0.5	6
xylitol	wheat bran		1.1	55	52	72	0.59	26	5.3	0.58	5.7
xylitol	wheat bran		3.1	80	34	96	0.93	27	9.7	0.39	3.1
xylitol	wheat bran		2.1	80	36	96	0.87	26	19.8	0.49	5.9
xylitol	wheat bran		1.1	80	39	96	0.6	18	30.3	0.64	2.8
xylitol	wheat bran		* Equal to the maximum xylitol yield.						avrg	0.536364
xylitol	wheat bran		The specific xylitol yield was calculated as the amount of xylitol produced divided by the amount of xylose consumed and expressed as g/g.							0.39
xylitol	wheat bran		yield g/g xylose	0.536364						0.71
xylitol	wheat bran		xylose in wheat bran	15.3
xylitol	wheat bran		yield g/g wheat bran	0.0820636
xylitol	wheat bran
xylitol	wheat bran	ref 4	Optimised fractionation of wheat bran for arabinose biopurification and xylitol fermentation by Ogataea zsoltii within a biorefinery process
xylitol	wheat bran		https://www.sciencedirect.com/science/article/pii/S0926669019305163?via%3Dihub#sec0010
xylitol	wheat bran
xylitol	wheat bran		Xylitol yields obtained in xylitol fermentation experiments were expressed as a percentage of theoretical or as the amount of xylitol produced divided by the amount of xylose consumed. Theoretical xylitol yield was calculated from the initial xylose concentration by assuming a complete (stoichiometric) conversion.
xylitol	wheat bran		the xylitol yields were 0.72 and 0.68 g xylitol/g xylose consumed on the II/A and II/B hydrolysates, respectively.
xylitol	wheat bran		yield g xylitol/g xylose	0.72
xylitol	wheat bran		yield g xylitol/g xylose	0.68
xylitol	wheat bran		avrg	0.7
xylitol	wheat bran		xylose in wheat bran	15.3
xylitol	wheat bran		yield g/g wheat bran	0.1071
xylitol	wheat bran
xylitol	wheat bran
xylitol	wheat bran
xylitol	wheat germ	theoretical	https://www.sciencedirect.com/science/article/pii/S0922338X98800263?casa_token=aLqBeV90biIAAAAA:uqYoRDUYXPdbjyYra-122gWl9FVoabLSx-h_EHf6fDpWVOsKLf0qIS6Sd5kzioR63hHTDi8
xylitol	wheat germ		Microbial conversion of d-xylose to xylitol
xylitol	wheat germ		avrg Yx/s (g xylitol/g xylose)	0.485909
xylitol	wheat germ		xylose in wheat germ %	0
xylitol	wheat germ		yield (g xylitol / g wheat germ)	0
xylitol	wheat germ
xylitol	wheat germ
xylitol	wheat germ
xylitol	wheat germ
xylitol	wheat germ

## Sheet: Tomato
Chemical	FL
Ethanol	Tomato	Ref 1	https://www.sciencedirect.com/science/article/pii/S0961953417302349#bib35
Ethanol	Tomato		Characterization and compositional analysis of agricultural crops and residues for ethanol production in California - ScienceDirect
Ethanol	Tomato		Biomass	US crop yield	CA crop yield	US production	CA production	Potential ethanol yieldd		References	Ethanol Yield
Ethanol	Tomato			(kgwb m−2)	(kgwb m−2)	(Ggwb)	(Ggwb)	(m3 Gg−1wb)	(m3 km−2)		(g/g tomato)
Ethanol	Tomato		Sugar beet root	6.21	10	71811	2549	127	1273	[9]
Ethanol	Tomato		Sugar beet leavesa	4.97	8	57449	2039	50	497	[9]
Ethanol	Tomato		Cantaloupeb	0.58	0.63	431	254	45	28	[35], [64]
Ethanol	Tomato		Honeydewb	0.49	0.48	81	62	52	25	[9], [35]
Ethanol	Tomato		Watermelonb	0.7	1.28	936	154	46	59	[9], [35]
Ethanol	Tomato		Tomatob	1.98	2.04	5728	5513	26	53	[9], [35]	0.020514
Ethanol	Tomato		m3 Gg−1wb	gigagram wet based
Ethanol	Tomato
Ethanol	Tomato
Ethanol	Tomato Pomace	Ref 1	https://link.springer.com/article/10.1007/s12155-019-10016-7						Figure 3
Ethanol	Tomato Pomace		Tomato Waste from Processing Industries as a Feedstock for Biofuel Production | BioEnergy Research (springer.com)
Ethanol	Tomato Pomace		Ethanol yield (g/ 100g Tomato Pomace)	5.21
Ethanol	Tomato Pomace		Ethanol yield (g/g Tomato Pomace)	0.0521
Ethanol	Tomato Pomace
Ethanol	Tomato Pomace
Ethanol	Tomato Pomace
Furfural	Tomato	theoretical	https://ift.co.za/media/mediafiles/archive/SAIChE%20Congress%202003%20Arnold%20and%20Buzzard%20paper.pdf
Furfural	Tomato		A NOVEL PROCESS FOR FURFURAL PRODUCTION
Furfural	Tomato
Furfural	Tomato		𝒀_(𝒇𝒖𝒓𝒇𝒖𝒓𝒂𝒍/𝒙𝒚𝒍𝒐𝒔𝒆 )	0.7272
Furfural	Tomato		xylose content	0.0038
Furfural	Tomato		Y furfural / biomass	0.00276336
Furfural	Tomato
Furfural	Tomato Pomace	theoretical	https://ift.co.za/media/mediafiles/archive/SAIChE%20Congress%202003%20Arnold%20and%20Buzzard%20paper.pdf
Furfural	Tomato Pomace		A NOVEL PROCESS FOR FURFURAL PRODUCTION
Furfural	Tomato Pomace
Furfural	Tomato Pomace		𝒀_(𝒇𝒖𝒓𝒇𝒖𝒓𝒂𝒍/𝒙𝒚𝒍𝒐𝒔𝒆 )	0.7272
Furfural	Tomato Pomace		xylose content	0.0151
Furfural	Tomato Pomace		Y furfural / biomass	0.0109807
Furfural	Tomato Pomace
HMF	Tomato	theoretical	HMF formation reactions (i.e., glucan hydrolysis, glucose isomerization, and fructose dehydration)
HMF	Tomato		C6H12O6 (Fructose) → C5H4O2CHO (Furfural) + 2H2O.
HMF	Tomato		180	126
HMF	Tomato		theoretical yield g/g fructose+glucose	0.7
HMF	Tomato		fructose+glucose in rice hull %	1.72
HMF	Tomato		theoretical yield g/ g rice	0.01204
HMF	Tomato
HMF	Tomato Pomace	theoretical	HMF formation reactions (i.e., glucan hydrolysis, glucose isomerization, and fructose dehydration)
HMF	Tomato Pomace		C6H12O6 (Fructose) → C5H4O2CHO (Furfural) + 2H2O.
HMF	Tomato Pomace		180	126
HMF	Tomato Pomace		theoretical yield g/g fructose+glucose	0.7
HMF	Tomato Pomace		fructose+glucose in rice hull %	1.67
HMF	Tomato Pomace		theoretical yield g/ g rice	0.01169
HMF	Tomato Pomace
FDCA	Tomato	theoretical	https://www.researchgate.net/figure/Theoretical-and-Overall-Yield-for-the-Conversion-of-Pure-Sugars-to-Ethylene-via-Ethanol_tbl6_259752935
FDCA	Tomato		Chemocatalytic Processes for the Production of Bio-Based Chemicals from Carbohydrates
FDCA	Tomato		theoretical yield FDCA from sugar g/g	0.867
FDCA	Tomato		fru+glu in Tomato %	3.17
FDCA	Tomato		theoretical yield FDCA from rice hull g/g	0.0274839
FDCA	Tomato
FDCA	Tomato Pomace	theoretical	https://www.researchgate.net/figure/Theoretical-and-Overall-Yield-for-the-Conversion-of-Pure-Sugars-to-Ethylene-via-Ethanol_tbl6_259752935
FDCA	Tomato Pomace		Chemocatalytic Processes for the Production of Bio-Based Chemicals from Carbohydrates
FDCA	Tomato Pomace		theoretical yield FDCA from sugar g/g	0.867
FDCA	Tomato Pomace		fru+glu in wheat tomato pomace %	7.87
FDCA	Tomato Pomace		theoretical yield FDCA from rice hull g/g	0.0682329
FDCA	Tomato Pomace
Isoprene	Tomato	theoretical	glucose in Tomato	1.46
Isoprene	Tomato		yield (isoprene/Tomato)	0.002482
Isoprene	Tomato
Isoprene	Tomato Pomace	theoretical	glucose in Tomato Pomace	6.21
Isoprene	Tomato Pomace		yield (isoprene/Tomato Pomace)	0.010557
Isoprene	Tomato Pomace
succinic acid	Tomato	theoretical	yield g/g sugar	0.667143
succinic acid	Tomato		glu+fru+xyl in Tomato	3.27464
succinic acid	Tomato		succinate yield g/g Tomato	0.0218465
succinic acid	Tomato Pomace	theoretical	yield g/g sugar	0.667143
succinic acid	Tomato Pomace		glu+fru+xyl in Tomato Pomace	9.38354
succinic acid	Tomato Pomace		succinate yield g/g Tomato Pomace	0.0626016
3-HP	Tomato	theoretical	yield g/g sugar	0.2365
3-HP	Tomato		glucose in Tomato	1.46719
3-HP	Tomato		yield (3-HP/Tomato)	0.0034699
3-HP
3-HP	Tomato Pomace	theoretical	yield g/g sugar	0.2365
3-HP	Tomato Pomace		glucose inTomato Pomace	6.20917
3-HP	Tomato Pomace		yield (3-HP/Tomato Pomace)	0.0146847
levulinic acid	Tomato	theoretical	Theoretical yield (g/g hexos)	0.521033
levulinic acid	Tomato		glu+fru Tomato (g/100g)	3.18306
levulinic acid	Tomato		Theoretical yield (g/g Tomato)	0.0165848
levulinic acid	Tomato
levulinic acid	Tomato Pomace	theoretical	Theoretical yield (g/g hexos)	0.521033
levulinic acid	Tomato Pomace		glu+fru Tomato pomace (g/100g)	7.87417
levulinic acid	Tomato Pomace		Theoretical yield (g/g Tomato pomace)	0.041027
lactic acid	Tomato	theoretical	https://link.springer.com/article/10.1007/s10570-019-02571-1
lactic acid	Tomato		Bioprocessing of rice husk into monosaccharides and the fermentative production of bioethanol and lactate
lactic acid	Tomato		YLA lactic acid yield expressed as percentage of theoretical lactic acid yield (0.76 g lactic acid per g sugar)
lactic acid	Tomato		theoretical yield (g lactic acid per g sugar)	0.76
lactic acid	Tomato		sugar from tomato g/g	3.27464
lactic acid	Tomato		theoretical yield (g lactic acid per g orange)	0.0248873
lactic acid	Tomato Pomace	ref 1	https://mdpi.com/2311-5637/7/1/3
lactic acid	Tomato Pomace		Fermentation as a Strategy for Bio-Transforming Waste into Resources: Lactic Acid Production from Agri-Food Residues
lactic acid	Tomato Pomace
lactic acid	Tomato Pomace
lactic acid	Tomato Pomace		Table 4. Small-scale lactic acid fermentations (100 mL).
lactic acid	Tomato Pomace		Waste	Ratio	Total Fermentable Carbohydrates (g/L)	Lactic Acid (g/L)	YLA
lactic acid	Tomato Pomace						(%)
lactic acid	Tomato Pomace		MW	100	51.4 ± 1.0	15.3 ± 0.9	30.4 ± 1.7%
lactic acid	Tomato Pomace		RCW	100	85.3 ± 2.2	34.0 ± 0.3	40 ± 2.2%
lactic acid	Tomato Pomace		PPR pretreated	100	80.3 ± 2.3	29.6 ± 2.3	36.8 ± 2.5%
lactic acid	Tomato Pomace		TP pretreated	100	33.3 ± 0.5	8.91 ± 0.2	27.0 ± 0.3%
lactic acid	Tomato Pomace		PP pretreated	100	68.7 ± 1.3	20.2 ± 1.5	30.6 ± 2.1%
lactic acid	Tomato Pomace		MW + PPR pretreated	2 days, 2:50:00	65.8 ± 3.3	28.6 ± 1.5	44.0 ± 1.3%
lactic acid	Tomato Pomace		MW + PPR pretreated	30:70	71.7 ± 2.7	25.6 ± 0.6	36 ± 3.2%
lactic acid	Tomato Pomace		MW + PPR pretreated	2 days, 22:30:00	59.7 ± 1.4	24.8 ± 2.2	41.5 ± 1.6%
lactic acid	Tomato Pomace		RCW + PPR pretreated	2 days, 2:50:00	82.4 ± 1.4	29.9 ± 0.6	35.4 ± 0.8%
lactic acid	Tomato Pomace		RCW + PPR pretreated	30:70	81.5 ± 2.3	25.4 ± 1.9	31,2 ± 1.4%
lactic acid	Tomato Pomace		RCW + PPR pretreated	2 days, 22:30:00	84.3 ± 1.6	38.8 ± 0.4	46.0 ± 0.7%
lactic acid	Tomato Pomace		RCW + PP	2 days, 2:50:00	59.4 ± 1.7	24.6 ± 0.6	41.4 ± 1.8%
lactic acid	Tomato Pomace		RCW + PP + TP	2 days, 12:20:20	71.6 ± 0.5	21.5 ± 1.3	29.8 ± 0.7%
lactic acid	Tomato Pomace
lactic acid	Tomato Pomace		Yield of LA per gram of sugars (YLA) was calculated by dividing the LA concentration by the total fermentable carbohydrates concentrations present in the starting material.
lactic acid	Tomato Pomace
lactic acid	Tomato Pomace
lactic acid	Tomato Pomace		yield g LA/g fermentable Carbohydrates	0.27
lactic acid	Tomato Pomace		fermentable Carbohydrates in TP	7.87417
lactic acid	Tomato Pomace		yield g LA /g TP	0.0212603
lactic acid	Tomato Pomace
lactic acid	Tomato Pomace	ref 2	https://www.aidic.it/cet/18/65/100.pdf
lactic acid	Tomato Pomace		Lactic Acid production from Tomato Pomace Fermentable Sugars using Innovative Biological Treatments
lactic acid	Tomato Pomace
lactic acid	Tomato Pomace
lactic acid	Tomato Pomace
lactic acid	Tomato Pomace		yield %	0.19
lactic acid	Tomato Pomace			1.36
lactic acid	Tomato Pomace			1.43
lactic acid	Tomato Pomace			1.69
lactic acid	Tomato Pomace		avrg	1.1675
lactic acid	Tomato Pomace
lactic acid	Tomato Pomace		The total solid (TS)
lactic acid	Tomato Pomace
lactic acid	Tomato Pomace		TS % in TP	65.8
lactic acid	Tomato Pomace
lactic acid	Tomato Pomace
lactic acid	Tomato Pomace		yield g/g TP	0.00768215
sorbitol	Tomato	theoretical	https://link.springer.com/article/10.1007/s00253-002-1046-0
sorbitol	Tomato		The biotechnological production of sorbitol
sorbitol	Tomato		avrg conversion of glucose and fructose %	95.2
sorbitol	Tomato		yield g/g glucose and fructose	0.962578
sorbitol	Tomato		glu+ fru in Tomato %	3.18306
sorbitol	Tomato		yield g/g Tomato	0.0306394
sorbitol	Tomato
sorbitol	Tomato Pomace	theoretical	https://link.springer.com/article/10.1007/s00253-002-1046-0
sorbitol	Tomato Pomace		The biotechnological production of sorbitol
sorbitol	Tomato Pomace		avrg conversion of glucose and fructose %	95.2
sorbitol	Tomato Pomace		yield g/g glucose and fructose	0.962578
sorbitol	Tomato Pomace		glu+ fru in Tomato pomace %	7.87417
sorbitol	Tomato Pomace		yield g/g Tomato pomace	0.075795
sorbitol	Tomato Pomace
xylitol	Tomato	theoretical	https://www.sciencedirect.com/science/article/pii/S0922338X98800263?casa_token=aLqBeV90biIAAAAA:uqYoRDUYXPdbjyYra-122gWl9FVoabLSx-h_EHf6fDpWVOsKLf0qIS6Sd5kzioR63hHTDi8
xylitol	Tomato		Microbial conversion of d-xylose to xylitol
xylitol	Tomato		avrg Yx/s (g xylitol/g xylose)	0.485909
xylitol	Tomato		xylose in Tomato %	0.0915818
xylitol	Tomato		yield (g xylitol / g Tomato)	0.000445004
xylitol	Tomato
xylitol	Tomato
xylitol	Tomato Pomace	theoretical	https://www.sciencedirect.com/science/article/pii/S0922338X98800263?casa_token=aLqBeV90biIAAAAA:uqYoRDUYXPdbjyYra-122gWl9FVoabLSx-h_EHf6fDpWVOsKLf0qIS6Sd5kzioR63hHTDi8
xylitol	Tomato Pomace		Microbial conversion of d-xylose to xylitol
xylitol	Tomato Pomace		avrg Yx/s (g xylitol/g xylose)	0.485909
xylitol	Tomato Pomace		xylose in Tomato pomace %	1.50937
xylitol	Tomato Pomace		yield (g xylitol / g Tomato pomace)	0.00733419
xylitol

## Sheet: Sugarcane
Chemical	FL
Ethanol	Sugar cane	Ref 1	https://biotechnologyforbiofuels.biomedcentral.com/articles/10.1186/s13068-015-0224-0						Table 5
Ethanol	Sugar cane		2G ethanol from the whole sugarcane lignocellulosic biomass | Biotechnology for Biofuels and Bioproducts | Full Text (biomedcentral.com)
Ethanol	Sugar cane		Variety	Symbol	Residue	Ethanol yield (% theoretical)	Theoretical max (g/g glucose)	Glucose in sugarcane (%)	Ethanol yield (g/g sugarcane)	v
Ethanol	Sugar cane		SP79-1011	K	Straw	74.7	0.51	21.65	0.08248	0.0768419
Ethanol	Sugar cane				Tops	65.52			0.0723439
Ethanol	Sugar cane
Ethanol	Sugar cane		RB867515	M	Straw	74.19			0.0819169
Ethanol	Sugar cane				Tops	64.47			0.0711846
Ethanol	Sugar cane
Ethanol	Sugar cane		SP81-3250	Q	Straw	73.9			0.0815967
Ethanol	Sugar cane				Tops	63.85			0.0705
Ethanol	Sugar cane
Ethanol	Sugar cane		RB92579	X	Straw	73.74			0.08142
Ethanol	Sugar cane				Tops	66.38			0.0732935
Ethanol	Sugar cane
Ethanol	Sugar cane				MAX	74.7
Ethanol	Sugar cane				MIN	63.85
Ethanol	Sugar cane
Ethanol	Sugar cane	Ref 2	https://www.sciencedirect.com/science/article/pii/S0960852407003586?via%3Dihub
Ethanol	Sugar cane		Production of fuel ethanol at high temperature from sugar cane juice by a newly isolated Kluyveromyces marxianus - ScienceDirect
Ethanol	Sugar cane		Condition	At 37 °C			At 40 °C
Ethanol	Sugar cane			Ethanol % (w/v)	Productivity (g/l/h)	% of theoretical yield	Ethanol % (w/v)	Productivity (g/l/h)	% of theoretical yield	Theoretical max (g/g glucose)	Glucose in sugarcane (%)	Ethanol yield (g/g sugarcane) column 1	Ethanol yield (g/g sugarcane) column 2	average
Ethanol	Sugar cane		Sugars (%)							0.51	21.65			0.0690867
Ethanol	Sugar cane		16	6.26 (42 h)	1.49	76.7	5.95 (48 h)	1.42	72.6			0.0846883	0.0801613			0.0690867
Ethanol	Sugar cane		18	6.92 (54 h)	1.28	75.4	6.03 (48 h)	1.26	65.7			0.0832529	0.0725427
Ethanol	Sugar cane		20	7.77 (54 h)	1.44	76.2	6.79 (48 h)	1.42	66.5			0.0841362	0.073426
Ethanol	Sugar cane		22	8.29 (54 h)	1.54	73.9	6.88 (54 h)	1.27	61.3			0.0815967	0.0676844
Ethanol	Sugar cane		24	7.51 (60 h)	1.25	61.4	6.54 (48 h)	1.36	53.4			0.0677948	0.0589616
Ethanol	Sugar cane
Ethanol	Sugar cane		(NH4)2SO4 (%)
Ethanol	Sugar cane		0	6.85 (72 h)	0.95	61	6.22 (54 h)	1.15	55.4			0.0673531	0.0611699
Ethanol	Sugar cane		0.05	7.35 (54 h)	1.36	65.5	6.60 (48 h)	1.37	58.8			0.0723218	0.064924
Ethanol	Sugar cane		0.07	7.80 (72 h)	1.08	69.5	6.27 (60 h)	1.05	55.9			0.0767384	0.061722
Ethanol	Sugar cane		0.1	7.46 (72 h)	1.04	66.5	6.41 (60 h)	1.07	57.2			0.073426	0.0631574
Ethanol	Sugar cane
Ethanol	Sugar cane		KH2PO4 (%)
Ethanol	Sugar cane		0	6.92 (72 h)	0.96	61.7	6.45 (60 h)	1.07	57.5			0.0681261	0.0634886
Ethanol	Sugar cane		0.025	7.12 (72 h)	0.99	63.5	6.02 (60 h)	1	53.7			0.0701135	0.0592929
Ethanol	Sugar cane		0.05	7.65 (72 h)	1.06	68.1	6.33 (72 h)	0.88	56.4			0.0751926	0.0622741
Ethanol	Sugar cane		0.1	7.55 (72 h)	1.05	67.3	6.12 (54 h)	1.13	54.6			0.0743093	0.0602866
Ethanol	Sugar cane
Ethanol	Sugar cane		MgSO4 · 7H2O (%)
Ethanol	Sugar cane		0	7.31 (72 h)	1.02	65.2	6.08 (72 h)	0.84	54.22			0.0719906	0.059867
Ethanol	Sugar cane		0.05	7.25 (72 h)	1.01	64.6	6.11 (54 h)	1.13	54.5			0.0713281	0.0601762
Ethanol	Sugar cane		0.1	7.24 (72 h)	1	64.5	6.11 (60 h)	1.02	54.43			0.0712177	0.0600989
Ethanol	Sugar cane		0.15	7.39 (72 h)	1.03	65.9	6.28 (60 h)	1.05	55.98			0.0727635	0.0618103
Ethanol	Sugar cane		0.2	7.12 (72 h)	0.99	63.4	6.08 (60 h)	1.01	54.22			0.0700031	0.059867
Ethanol	Sugar cane		0.3	6.94 (72 h)	0.96	61.9	6.04 (72 h)	0.84	53.87			0.0683469	0.0594806
Ethanol	Sugar cane
Ethanol	Sugar cane		pH
Ethanol	Sugar cane		pH 4.0	7.26 (96 h)	0.76	64.7	5.94 (84 h)	0.71	52.9			0.0714385	0.0584095
Ethanol	Sugar cane		pH 4.5	7.68 (96 h)	0.8	68.5	5.78 (96 h)	0.6	51.5			0.0756343	0.0568637
Ethanol	Sugar cane		pH 5.0	8.70 (60 h)	1.45	77.5	6.57 (60 h)	1.09	58.5			0.0855716	0.0645928
Ethanol	Sugar cane		pH 5.5	8.50 (60 h)	1.42	75.8	6.78 (60 h)	1.13	60.4			0.0836946	0.0666907
Ethanol	Sugar cane							MAX	77.5
Ethanol	Sugar cane							MIN	51.5
Ethanol	Sugar cane	Ref 3	https://www.sciencedirect.com/science/article/pii/S0960852411002008
Ethanol	Sugar cane		Enhanced ethanol production from sugarcane juice by galactose adaptation of a newly isolated thermotolerant strain of Pichia kudriavzevii
Ethanol	Sugar cane		Maximum ethanol concentration of 71.9 g L−1 was achieved in 18 h resulting in an ethanol productivity of 4.0 g L−1 h−1 and ethanol yield corresponding to 85% of the theoretical yield during fermentation in a 2.5 L batch fermenter
Ethanol	Sugar cane		Ethanol yield (% Theoretical)	85
Ethanol	Sugar cane		Theoretical max (g/g glucose)	0.51
Ethanol	Sugar cane		Glucose in sugarcane (%)	21.65		0.0938527
Ethanol	Sugar cane		Ethanol yield (g/g sugarcanel)	0.0938527
Ethanol	Sugar cane
Ethanol	Sugar cane	Ref 4	https://www.sciencedirect.com/science/article/pii/S0960852412016409#t0015
Ethanol	Sugar cane		Increase in ethanol production from sugarcane bagasse based on combined pretreatments and fed-batch enzymatic hydrolysis
Ethanol	Sugar cane		Table 3. Yields and efficiencies of the fermentations of the hydrolysates of non-delignified (ND) and delignified (D) bagasse from fed-batch enzymatic hydrolyses.
Ethanol	Sugar cane		Hydrolysates	YX/S (g/g)	YE/S (g/g)	YG/S (g/g)	YAC/S (g/g)	EF (%)
Ethanol	Sugar cane		ND12	0.03 ± 0.01	0.367 ± 0.02	0.024 ± 0.001	0.013 ± 0.003	73.00 ± 7.93
Ethanol	Sugar cane		ND24	0.11 ± 0.01	0.289 ± 0.03	0.053 ± 0.001	0.019 ± 0.003	57.66 ± 0.49
Ethanol	Sugar cane		ND48	0.09 ± 0.02	0.232 ± 0.20	0.061 ± 0.003	0.027 ± 0.001	46.47 ± 5.22
Ethanol	Sugar cane		D12	0.05 ± 0.01	0.392 ± 0.007	0.048 ± 0.002	0.011 ± 0.001	78.47 ± 2.24
Ethanol	Sugar cane		D24	0.06 ± 0.01	0.357 ± 0.30	0.047 ± 0.003	0.012 ± 0.001	70.51 ± 0.45
Ethanol	Sugar cane		D48	0.09 ± 0.01	0.368 ± 0.010	0.057 ± 0.003	0.013 ± 0.002	73.18 ± 9.65
Ethanol	Sugar cane		YX/S, biomass yield; YE/S, ethanol yield; YG/S, glycerol yield; YAC/S, acetic acid yield; EF, efficiency.
Ethanol	Sugar cane
Ethanol	Sugar cane		yield g/g glucose	0.367
Ethanol	Sugar cane			0.289
Ethanol	Sugar cane			0.232
Ethanol	Sugar cane			0.392
Ethanol	Sugar cane			0.357
Ethanol	Sugar cane			0.368
Ethanol	Sugar cane		avrg	0.334167
Ethanol	Sugar cane		glucose in sugarcane	19.8483
Ethanol	Sugar cane		Ethanol yield (g/g sugarcane)	0.0663265
Ethanol	Sugar cane
Ethanol	Sugar cane
Ethanol	Sugar cane
Ethanol	Sugar cane
Ethanol	Sugar cane
Ethanol	Sugar cane	Ref 5	https://onlinelibrary.wiley.com/doi/full/10.1111/gcbb.12891
Ethanol	Sugar cane		Lowering whole cost for sugarcane-based ethanol production by engineered Zymomonas mobilis
Ethanol	Sugar cane		TABLE 4. Kinetic parameters of ethanol production by Z. mobilis S912 under different nitrogen sources conditions
Ethanol	Sugar cane		Strain	Nitrogen sources	Consumed sugar (g/L)	Parameters (mean ± SD)a					Byproducts
Ethanol	Sugar cane					Cell density (OD600)	P (g/L)	Qp (g/L/h)	Yps (g/g)	E (%)	Sorbitol (g/L)	Levan (g/L)	Acetic acid (g/L)	Propionic acid (g/L)
Ethanol	Sugar cane		Z. mobilis S912	Controlb	101.45 ± 0.15	1.88 ± 0.05	36.60 ± 0.59	2.03 ± 0.03	0.36	69.81	8.30 ± 0.15	2.50 ± 0.09	0.77 ± 0.01	3.88 ± 0.06
Ethanol	Sugar cane			0.5 g/L Urea	110.26 ± 0.12	1.50 ± 0.04	37.92 ± 0.68	1.05 ± 0.02	0.34	66.43	15.37 ± 0.75	4.13 ± 0.13	0.72 ± 0.03	3.01 ± 0.33
Ethanol	Sugar cane			1 g/L (NH4)2SO4	109.53 ± 0.14	1.47 ± 0.02	37.86 ± 0.99	1.04 ± 0.03	0.35	66.9	12.44 ± 0.31	4.80 ± 0.01	0.72 ± 0.04	2.60 ± 0.08
Ethanol	Sugar cane			1 g/L (NH4)2SO4 and 1 g/L YE	94.80 ± 0.09	1.97 ± 0.04	39.39 ± 0.67	2.07 ± 0.04	0.42	80.66	2.27 ± 0.33	5.96 ± 0.26	0.43 ± 0.04	0.30 ± 0.08
Ethanol	Sugar cane		a E, fermentation efficiency; P, ethanol concentration; Qp, volumetric ethanol productivity; YE, yeast extract; Yps, ethanol yield. The experiments were performed in triplicate.
Ethanol	Sugar cane		b No nitrogen source added, diluted with sterilized water.
Ethanol	Sugar cane
Ethanol	Sugar cane		yield g/g glucose	0.3675
Ethanol	Sugar cane		glucose in sugarcane	19.8483
Ethanol	Sugar cane		Ethanol yield (g/g sugarcane)	0.0729426
Ethanol	Sugar cane
Ethanol	Sugar cane bagasse	Ref 1	https://biotechnologyforbiofuels.biomedcentral.com/articles/10.1186/s13068-015-0224-0						Table 5
Ethanol	Sugar cane bagasse		2G ethanol from the whole sugarcane lignocellulosic biomass | Biotechnology for Biofuels and Bioproducts | Full Text (biomedcentral.com)
Ethanol	Sugar cane bagasse		Variety	Symbol	Residue	Ethanol yield (% theoretical)	Theoretical max (g/g glucose)	Glucose in bagasse (%)	Ethanol yield (g/g sugarcane)	average
Ethanol	Sugar cane bagasse		SP79-1011	K			0.51	70.84		0.203234
Ethanol	Sugar cane bagasse										0.203234
Ethanol	Sugar cane bagasse				Bagasse	54.69			0.197586
Ethanol	Sugar cane bagasse		RB867515	M
Ethanol	Sugar cane bagasse
Ethanol	Sugar cane bagasse				Bagasse	55.91			0.201994
Ethanol	Sugar cane bagasse		SP81-3250	Q
Ethanol	Sugar cane bagasse
Ethanol	Sugar cane bagasse				Bagasse	58.16			0.210123
Ethanol	Sugar cane bagasse		RB92579	X
Ethanol	Sugar cane bagasse
Ethanol	Sugar cane bagasse				Bagasse	56.3
Ethanol	Sugar cane bagasse				MAX	58.16
Ethanol	Sugar cane bagasse				MIN	54.69
Ethanol	Sugar cane bagasse
Ethanol	Sugar cane bagasse	Ref 2	https://www.sciencedirect.com/science/article/pii/S001623612302656X?via%3Dihub					Table 2
Ethanol	Sugar cane bagasse		Bioethanol production from mixed sugars at a semi-pilot scale through two-step repeated sequential fermentation - ScienceDirect
Ethanol	Sugar cane bagasse		Exp. Type	Exp. Stage	Si	T	Pf	QP	QS	YP/S	E (%)	Pi	Sf	Total Sugar in Bagasse	Ethanol yield	Average
Ethanol	Sugar cane bagasse		Units		g.L−1	h	g.L−1	g.L−1.h−1	g.L−1.h−1	g.g−1		g.L−1	g.L−1	%	(g/g bagasse)	(g/g bagasse)
Ethanol	Sugar cane bagasse		Config. 1	S I	10.65 ± 0.64	12	4.94 ± 0.11	0.38	0.87	0.46	89.28	0.38 ± 0.12	0.67 ± 0.15	80.23	0.369058	0.325505
Ethanol	Sugar cane bagasse			S II	17.00 ± 0.25	24	8.30 ± 0.44	0.32	0.67	0.47	92.52	0.50 ± 0.09	0.52 ± 0.47		0.377081
Ethanol	Sugar cane bagasse			S I + II	27.66 ± 0.88	36	13.24 ± 0.54	0.34	0.73	0.47	91.3	0.89 ± 0.02	1.18 ± 0.32		0.377081
Ethanol	Sugar cane bagasse														0
Ethanol	Sugar cane bagasse		Config. 2	S I	98.35 ± 1.85	24	48.79 ± 1.26	2	4.07	0.49	96.17	0.79 ± 0.51	0.68 ± 0.41		0.393127
Ethanol	Sugar cane bagasse			S II	57.03 ± 0.15	30	27.29 ± 0.31	0.88	1.89	0.47	91.23	0.89 ± 0.18	0.38 ± 0.05		0.377081
Ethanol	Sugar cane bagasse			S I + II	155. 38 ± 2.00	54	77.65 ± 2.50	1.38	2.86	0.48	94.36	1.67 ± 0.33	1.06 ± 0.47		0.385104
Ethanol	Sugar cane bagasse								MAX	0.49
Ethanol	Sugar cane bagasse								MIN	0.46						0.325505
Ethanol	Sugar cane bagasse
Ethanol	Sugar cane bagasse	Ref 3	https://www.sciencedirect.com/science/article/pii/S0926669023008130?via%3Dihub
Ethanol	Sugar cane bagasse		Detoxification of high solid-liquid hydrothermal pretreated sugar cane bagasse by chromatographic adsorption for cellulosic ethanol production - ScienceDirect
Ethanol	Sugar cane bagasse		The yield of ethanol was 210 ± 1 mg/g SCB.
Ethanol	Sugar cane bagasse		Ethanol yield (mg/g SCB)	210
Ethanol	Sugar cane bagasse		Ethanol yield (g/g SCB)	0.21
Ethanol	Sugar cane bagasse
Ethanol	Sugar cane bagasse	Ref 4	https://sci-hub.se/10.1016/j.renene.2012.07.003			Table 2a
Ethanol	Sugar cane bagasse		Sci-Hub | Comparative study on ethanol production from pretreated sugarcane bagasse using immobilized Saccharomyces cerevisiae on various matrices. Renewable Energy, 50, 488–493 | 10.1016/j.renene.2012.07.003
Ethanol	Sugar cane bagasse		Batch	Ethanol (gp/L)	Ethanol yield (gp/gs)	Total Sugar in Bagasse	Ethanol yield	Average
Ethanol	Sugar cane bagasse		1	15.4	0.44	%	(g/g bagasse)	(g/g bagasse)
Ethanol	Sugar cane bagasse		2	14.3	0.42	80.23	0.353012	0.314502	0.314502
Ethanol	Sugar cane bagasse		3	15.5	0.43		0.336966
Ethanol	Sugar cane bagasse		4	15.3	0.44		0.344989
Ethanol	Sugar cane bagasse		5	15.2	0.45		0.353012
Ethanol	Sugar cane bagasse		6	15.2	0.43		0.361035
Ethanol	Sugar cane bagasse		7	15.1	0.42		0.344989
Ethanol	Sugar cane bagasse		8	11.3	0.38		0.336966
Ethanol	Sugar cane bagasse		9	7.5	0.3		0.304874
Ethanol	Sugar cane bagasse		10	4.2	0.21		0.24069
Ethanol	Sugar cane bagasse			MAX	0.45		0.168483
Ethanol	Sugar cane bagasse			MIN	0.21
Ethanol	Sugar cane bagasse
Ethanol	Sugar cane bagasse	Ref 5	https://www.sciencedirect.com/science/article/pii/S138589471101165X?via%3Dihub				Table 5 & 7
Ethanol	Sugar cane bagasse		Comparison of process configurations for ethanol production from two-step pretreated sugarcane bagasse - ScienceDirect
Ethanol	Sugar cane bagasse		Exp.	X1	X2	Ethanol concentration, g/L	Input of bagasse, kg/L ethanol			Input of bagasse, kg/L ethanol	Ethanol yield (g/g SCB)	average
Ethanol	Sugar cane bagasse		1	+	+	32.75 ± 0.14	5.79 ± 0.04			5.79	0.135233	0.122963
Ethanol	Sugar cane bagasse		2	+	−	29.55 ± 0.73	6.14 ± 0.15			6.14	0.127524
Ethanol	Sugar cane bagasse		3	−	+	22.06 ± 0.17	8.54 ± 0.11			8.54	0.0916862
Ethanol	Sugar cane bagasse		4	−	−	20.94 ± 0.27	8.65 ± 0.07			8.65	0.0905202
Ethanol	Sugar cane bagasse		SSF^ PSSF v
Ethanol	Sugar cane bagasse		Trials	Variables				Results	Empty Cell
Ethanol	Sugar cane bagasse		Empty Cell	X1	X2	X3	X4	ethanol concentration, g/L	Input of bagasse, kg/L ethanol
Ethanol	Sugar cane bagasse		1	+	+	+	+	35.16 ± 0.61	5.35 ± 0.09	5.35	0.146355
Ethanol	Sugar cane bagasse		2	+	−	+	−	27.30 ± 0.29	5.37 ± 0.06	5.37	0.14581
Ethanol	Sugar cane bagasse		3	+	−	−	+	26.28 ± 0.61	6.89 ± 0.16	6.89	0.113643
Ethanol	Sugar cane bagasse		4	+	+	−	−	24.59 ± 0.61	6.22 ± 0.16	6.22	0.125884
Ethanol	Sugar cane bagasse		5	−	−	+	+	31.43 ± 0.54	5.76 ± 0.1	5.76	0.135937
Ethanol	Sugar cane bagasse		6	−	+	+	−	25.35 ± 1.2	5.96 ± 0.29	5.96	0.131376
Ethanol	Sugar cane bagasse		7	−	+	−	+	28.81 ± 1.38	6.54 ± 0.34	6.54	0.119725
Ethanol	Sugar cane bagasse		8	−	−	−	−	21.03 ± 0.71	7.00 ± 0.17	7	0.111857
Ethanol	Sugar cane bagasse								MAX	8.65
Ethanol	Sugar cane bagasse								MIN	5.35
Ethanol	Sugar cane bagasse
Ethanol	Sugar cane Molasses	Ref 1	https://www.scielo.br/j/bjm/a/tMZzMhg7xVLL9QqsrKNRzSx/?lang=en#ModalTablet01				Table 1
Ethanol	Sugar cane Molasses		SciELO - Brazil - Ethanol fermentation of sugarcane molasses by Zymomonas mobilis MTCC 92 immobilized in Luffa cylindrica L. sponge discs and Ca-alginate matrices Ethanol fermentation of sugarcane molasses by Zymomonas mobilis MTCC 92 immobilized in Luffa cylindrica L. sponge discs and Ca-alginate matrices
Ethanol	Sugar cane Molasses			Ethanol yield (g/g glucose)	Glucose in molasses %	Ethanol yield (g/g molasses)	average
Ethanol	Sugar cane Molasses		Luffa immobilized cell	0.416	27.37	0.113859	0.114543
Ethanol	Sugar cane Molasses		Ca-Alginate immobilized cell	0.421		0.115228
Ethanol	Sugar cane Molasses
Ethanol	Sugar cane Molasses	Ref 2	https://openscholar.dut.ac.za/bitstream/10321/888/1/nofemele_sure_et_al_2012.pdf
Ethanol	Sugar cane Molasses		nofemele_sure_et_al_2012.pdf (dut.ac.za)
Ethanol	Sugar cane Molasses		The fermentation performance of molasses supplemented with various urea concentrations at the various temperatures revealed that a urea concentration of 4 gl-1 gave maximum fermentation efficiency of 85.12% and ethanol yield of 8.7% m/v at 35°C at 30°C, lower fermentation efficiency was (78.07%) and ethanol yields (7.9% m/v) were achieved, while at 40°C, it was 64.57 and 6.6% m/v, respectively. O…
Ethanol	Sugar cane Molasses		Ethanol yield (% theoretical)	Theoretical max	Glucose in this molasses %	Ethanol yield (g/g molasses)	average
Ethanol	Sugar cane Molasses		85.12	0.51	23.5789	0.102359	0.0905502
Ethanol	Sugar cane Molasses		78.07			0.0938812
Ethanol	Sugar cane Molasses		65.57			0.0788497
Ethanol	Sugar cane Molasses		79.25			0.0953002
Ethanol	Sugar cane Molasses		68.49			0.082361
Ethanol	Sugar cane Molasses		85.12	MAX	The TSAI composition of molasses was 39% (m/v) comprised mainly of sucrose (22%), glucose (12%) and fructose (5%).
Ethanol	Sugar cane Molasses		65.57	MIN
Ethanol	Sugar cane Molasses
Ethanol	Sugar cane Molasses	Ref 3	https://www.sciencedirect.com/science/article/pii/S0961953412004424
Ethanol	Sugar cane Molasses		Performances comparison between three technologies for continuous ethanol production from molasses - ScienceDirect
Ethanol	Sugar cane Molasses		Reactors	CSTR			ICR			MBR		P
Ethanol	Sugar cane Molasses			Run 1	Run 2	Run 3	Run 1	Run 2	Run 3	Run 1	Run2	Empty Cell
Ethanol	Sugar cane Molasses		Dilution rate D (h−1)	0.12	0.25	0.5	0.12	0.25	0.5	0.31–0.5	0.31	–
Ethanol	Sugar cane Molasses		Ethanol concentration (g L−1)	27.9 ± 1.9	21.6 ± 1.9	11.6 ± 1.6	44.06 ± 1.9	32 ± 1.1	20.2 ± 0.6	41.4 ± 1.8	46.5 ± 1.5	0.0032
Ethanol	Sugar cane Molasses		Productivity: Qp (g L−1 h−1)	3.34 ± 0.2	5.4 ± 0.3	6.8 ± 0.3	5.28 ± 0.2	8.0 ± 0.4	10.1 ± 0.6	12.83–19.2	14.41 ± 0.6	0.0061
Ethanol	Sugar cane Molasses		Substrate inlet (g L−1)	100	100	100	100	100	100	100	100
Ethanol	Sugar cane Molasses		Substrate outlet (g L−1)	18.3 ± 1.7	31.1 ± 2.9	51.5 ± 1.2	2.9 ± 0.4	9.6 ± 0.6	26.8 ± 1	2.3 ± 0.2	0.7 ± 0.1	0.004
Ethanol	Sugar cane Molasses		Sugar consumption: Ys (%)	81.7 ± 2.1	68.9 ± 2.4	48.5 ± 1.8	97.1 ± 3.2	90.4 ± 4.1	73.2 ± 3.8	97.7 ± 2.8	99.3 ± 2.9	0.0012
Ethanol	Sugar cane Molasses		Biomass in the reactor (g L−1)	4.8 ± 0.4	4.9 ± 0.16	2.4 ± 0.13	–	–	–	8.4–26.7	26.13–41.1	–
Ethanol	Sugar cane Molasses		YP/S yield (g ethanol g substrate−1)	0.34 ± 0.01	0.31 ± 0.01	0.24 ± 0.01	0.45 ± 0.02	0.35 ± 0.01	0.27 ± 0.01	0.42 ± 0.02	0.46 ± 0.01	0.0056	Max	Min
Ethanol	Sugar cane Molasses		YP/S yield (g ethanol g substrate−1)	0.34	0.31	0.24	0.45	0.35	0.27	0.42	0.46		0.46	0.24
Ethanol	Sugar cane Molasses		During the first run (D = 0.12 h−1) the concentration of residual sugar was stabilised at an average value of 18.3 g L−1 equal to a substrate conversion yield (Ys) of 81.7%.
Ethanol	Sugar cane Molasses		Sugarcane (Saccharum officinarum) cultivars employed in this work were harvested in the central province of Santiago (Cuba) on 2008. Molasses, from which fermentation medium were prepared, were obtained from the STS Company of Tunis. They have the following composition: dry matter (72.2%), total sugars (48.5%)
Ethanol	Sugar cane Molasses		Substrate (% molasses)	39.6245
Ethanol	Sugar cane Molasses		Yield (g eth/g molasses)	0.134723	0.122836	0.0950988	0.17831	0.138686	0.106986	0.166423	0.182273
Ethanol	Sugar cane Molasses		average	0.140667
Ethanol	Sugar cane Molasses
Ethanol	Sugar cane Molasses	Ref 4	https://www.sciencedirect.com/science/article/pii/S096014811000340X
Ethanol	Sugar cane Molasses		Cane molasses fermentation for continuous ethanol production in an immobilized cells reactor by Saccharomyces cerevisiae - ScienceDirect
Ethanol	Sugar cane Molasses		The maximum ethanol production, theoretical yield (YE/S), volumetric ethanol productivity (QP) and total sugar consumption was 19.15 g/l, 46.23%, 2.39 g l−1 h−1 and 96%, respectively.
Ethanol	Sugar cane Molasses		Ethanol yield (% theoretical)	Theoretical max	Glucose in molasses %	Ethanol yield (g/g molasses)
Ethanol	Sugar cane Molasses		46.23	0.51	27.37	0.0555928
Ethanol	Sugar cane Molasses
Ethanol	Sugar cane Molasses	Ref 5	https://www.sciencedirect.com/science/article/pii/S0960852406004512?casa_token=DCUUSwqzhwEAAAAA:AAb0EcEw6557QDvSW4FnO_HMzZ2lNRJFKv_YbEeusuUBFDllci87FSqGp6XZBwC-wa_0KQY#tbl2
Ethanol	Sugar cane Molasses		Fermentation of molasses by Zymomonas mobilis: Effects of temperature and sugar concentration on ethanol production
Ethanol	Sugar cane Molasses		Table 3. 22 Central composite design and star design investigating the effects of TRS in molasses and temperature on the ethanol production by Z. mobilis ATCC 29191
Ethanol	Sugar cane Molasses		Run	Coded levels		Real levels			Measured responses
Ethanol	Sugar cane Molasses		Empty Cell	X1	X2	TRS (g L−1)	Temperature (°C)	Ethanol (g L−1)	Ypra (%)	Yp/sb (g g−1)	Qpc (g L−1 h−1)	Biomass (g L−1)
Ethanol	Sugar cane Molasses		1	−	−	150	25	46.43	64.26	0.35	0.97	1.39
Ethanol	Sugar cane Molasses		2	+	−	250	35	42.39	73.98	0.4	0.88	1.46
Ethanol	Sugar cane Molasses		3	−	+	150	25	47.73	77.01	0.42	0.99	1.25
Ethanol	Sugar cane Molasses		4	+	+	250	35	45.22	74.56	0.4	0.94	1.46
Ethanol	Sugar cane Molasses		5	0	0	200	30	55.36	62.13	0.34	1.15	1.76
Ethanol	Sugar cane Molasses		6	0	0	200	30	54.31	58.37	0.32	1.13	1.67
Ethanol	Sugar cane Molasses		7	0	0	200	30	55.57	63.03	0.34	1.16	1.76
Ethanol	Sugar cane Molasses		8	−1414	0	80	30	28.55	73.04	0.4	0.59	1.39
Ethanol	Sugar cane Molasses		9	0	1414	200	37	22.83	44.66	0.24	0.47	1.65
Ethanol	Sugar cane Molasses		10	1414	0	270	30	33.43	53.2	0.29	0.7	1.6
Ethanol	Sugar cane Molasses		11	0	−1414	200	18	7.87	46.62	0.24	0.16	0.15
Ethanol	Sugar cane Molasses		a	Ypr (%) = substrate conversion.					min	0.24
Ethanol	Sugar cane Molasses		b	Yp/s (g g−10) = yield ethanol for substrate.					max	0.42
Ethanol	Sugar cane Molasses		c	Qp (g L−1 h−1) = ethanol productivity.
Ethanol	Sugar cane Molasses		yield g/g glucose	0.34
Ethanol	Sugar cane Molasses		glucose in Sugar cane Molasses	27.3737
Ethanol	Sugar cane Molasses		Ethanol yield (g/g molasses)	0.0930705
Ethanol	Sugar cane Molasses
Ethanol	Sugar cane Molasses
Ethanol	Sugar cane Molasses
Furfural	Sugar cane	Ref 1	https://www.sciencedirect.com/science/article/pii/S1350417718308320			Table 1
Furfural	Sugar cane		Furfural production from lignocellulosic biomass by ultrasound-assisted acid hydrolysis - ScienceDirect
Furfural	Sugar cane		Feedstock	Furfural production, mg g−1	Furfural yield, %	Furfural yield (g/g)
Furfural	Sugar cane		Rice husk	36.4 ± 7.9	3.64
Furfural	Sugar cane		Sugar cane straw	49.9 ± 5.1	4.99	0.0499
Furfural	Sugar cane		Yerba-mate waste	62.1 ± 2.0	6.21
Furfural	Sugar cane		Grass	72.4 ± 4.3	7.24
Furfural	Sugar cane		Wood waste	60.8 ± 9.0	6.08
Furfural	Sugar cane
Furfural	Sugar cane
Furfural	Sugar cane
Furfural	Sugar cane
Furfural	Sugar cane
Furfural	Sugar cane bagasse	Ref 1	https://www.sciencedirect.com/science/article/pii/S0926669017300146			Table 3
Furfural	Sugar cane bagasse		Furfural production from biomass–derived carbohydrates and lignocellulosic residues via heterogeneous acid catalysts - ScienceDirect
Furfural	Sugar cane bagasse		Table 3. Results of sugarcane bagasse and corncob conversion experimentsa.
Furfural	Sugar cane bagasse		Entry	Feedstock	Catalyst	Temperature (K)	Time (min)	Furfural yield		5–HMF yield		Furfural yield (%)	average yield (g/g)
Furfural	Sugar cane bagasse		Empty Cell	Empty Cell	Empty Cell	Empty Cell	Empty Cell	mol%	wt%c	mol%	wt%c		0.1174
Furfural	Sugar cane bagasse		1	Corncob	Al–Beta	448	100	47.6 ± 1.0	18.2 ± 0.8	13.2 ± 0.4	4.1 ± 0.3
Furfural	Sugar cane bagasse		2b	Corncob	Al–Beta	448	130	36.7 ± 1.9	14.0 ± 0.7	9.8 ± 0.7	3.0 ± 0.2
Furfural	Sugar cane bagasse		3	Corncob	Fe–Beta	448	100	40.1 ± 1.8	15.4 ± 0.8	11.6 ± 0.7	3.6 ± 0.2
Furfural	Sugar cane bagasse		4	Corncob	Cr–Beta	448	100	36.4 ± 1.6	13.9 ± 0.7	10.4 ± 0.6	3.2 ± 0.2
Furfural	Sugar cane bagasse		5	Corncob	Al–Beta	458	85	51.1 ± 2.0	19.6 ± 0.7	16.7 ± 0.8	5.2 ± 0.2
Furfural	Sugar cane bagasse		6	Corncob	Fe–Beta	458	85	44.5 ± 2.0	17.0 ± 0.7	12.9 ± 0.8	4.0 ± 0.2
Furfural	Sugar cane bagasse		7	Sugarcane bagasse	Al–Beta	448	50	22.3 ± 1.0	8.5 ± 0.7	8.9 ± 0.4	2.8 ± 0.2	8.5
Furfural	Sugar cane bagasse		8	Sugarcane bagasse	Al–Beta	448	90	32.3 ± 1.5	12.4 ± 0.8	11.4 ± 0.6	3.5 ± 0.3	12.4
Furfural	Sugar cane bagasse		9	Sugarcane bagasse	Al–Beta	448	120	28.9 ± 1.2	11.0 ± 0.7	9.5 ± 0.4	2.9 ± 0.2	11
Furfural	Sugar cane bagasse		10	Sugarcane bagasse	Fe–Beta	448	100	29.0 ± 1.3	11.1 ± 0.6	10.1 ± 0.5	3.1 ± 0.2	11.1
Furfural	Sugar cane bagasse		11	Sugarcane bagasse	Al–Beta	458	85	40.9 ± 1.4	15.7 ± 0.7	9.6 ± 0.5	3.0 ± 0.2	15.7
Furfural	Sugar cane bagasse										MAX	15.7
Furfural	Sugar cane bagasse										MIN	8.5
Furfural	Sugar cane bagasse
Furfural	Sugar cane bagasse	Ref 2	https://www.sciencedirect.com/science/article/pii/S138589471731803X			Figure 1
Furfural	Sugar cane bagasse		Rapid and simultaneous production of furfural and cellulose-rich residue from sugarcane bagasse using a pressurized phosphoric acid-acetone-water system - ScienceDirect
Furfural	Sugar cane bagasse		Furfural yield (mol%)	45.8
Furfural	Sugar cane bagasse		Furfural yield (g/g bagasse)	0.0607443
Furfural	Sugar cane bagasse
Furfural	Sugar cane bagasse
Furfural	Sugar cane bagasse						The compositional analysis of the bagasse revealed that the biomass was composed of 38.55% glucan (42.83% glucose), 18.24% xylan (20.73% xylose), and 24.77% K-lignin on a dry weight basis.
Furfural	Sugar cane bagasse
Furfural	Sugar cane bagasse	Ref 3	https://pubs.rsc.org/en/content/articlelanding/2014/ra/c4ra04119d
Furfural	Sugar cane bagasse		Exceptionally high yields of furfural from assorted raw biomass over solid acids - RSC Advances (RSC Publishing)
Furfural	Sugar cane bagasse		the literature.37 Fig. 2 illustrates that from real substrates a remarkably high yield of 93% is achievable for furfural when the reactions were performed at 443 K for 8 h. In particular, when bagasse is used a 92 _x0003_ 1% yield is possible
Furfural	Sugar cane bagasse		Furfural yield (% hemicellulose)	92
Furfural	Sugar cane bagasse		cellulose in bagasse	54.87
Furfural	Sugar cane bagasse		Fufural yield (g/g bagasse)	0.504804
Furfural	Sugar cane bagasse
Furfural	Sugar cane bagasse	Ref 4	https://www.sciencedirect.com/science/article/pii/S1364032120304639#bib61				Table 2
Furfural	Sugar cane bagasse		A review on solvent systems for furfural production from lignocellulosic biomass - ScienceDirect
Furfural	Sugar cane bagasse		Process	Temperature (°C)	Pressure (bar)	Catalyst	Feedstock	Furfural yield (%)	Ref.	Furfural yield (mol%)	Furfural yield (g/g bagasse)	average
Furfural	Sugar cane bagasse		Westpro	160–165	–	H2SO4	Corn Cobs	35–50	[11]			0.062999
Furfural	Sugar cane bagasse		SupraYield®	230–250	–	H2SO4	Hardwood	50–70	[23]
Furfural	Sugar cane bagasse		Quaker Oats	153	5.15	H2SO4	Oat Hull	<50	[24]
Furfural	Sugar cane bagasse		ROSENLEW	180	10	Autocatalysis (acetic acid, formic acid, higher carboxylic acids)	Bagasse	59.5	[24]	59.5	0.0789146
Furfural	Sugar cane bagasse		DuPont	100–250	2.1	H2SO4	Corn cob	61–84	[25]
Furfural	Sugar cane bagasse		Shell Oil Company	150–200	<10.00	HCl	Bagasse	18–53	[26]	35.5	0.0470835
Furfural	Sugar cane bagasse								max	59.5
Furfural	Sugar cane bagasse
Furfural	Sugar cane bagasse
Furfural	Sugar cane bagasse
Furfural	Sugar cane molasses	theoretical	https://ift.co.za/media/mediafiles/archive/SAIChE%20Congress%202003%20Arnold%20and%20Buzzard%20paper.pdf
Furfural	Sugar cane molasses		A NOVEL PROCESS FOR FURFURAL PRODUCTION
Furfural	Sugar cane molasses
Furfural	Sugar cane molasses		𝒀_(𝒇𝒖𝒓𝒇𝒖𝒓𝒂𝒍/𝒙𝒚𝒍𝒐𝒔𝒆 )	0.7272
Furfural	Sugar cane molasses		xylose content	0.0053
Furfural	Sugar cane molasses		Y furfural / biomass	0.00385416
Furfural	Sugar cane molasses
HMF	Sugar cane	Ref 1	https://chemistry-europe.onlinelibrary.wiley.com/doi/10.1002/slct.201801814
HMF	Sugar cane		Eco‐Friendly Production of 5‐Hydroxymethylfurfural from Sucrose Using Commercially Available Dihydric Phosphate as a Catalyst - Ma - 2018 - ChemistrySelect - Wiley Online Library
HMF	Sugar cane		This environmentally friendly system is also broadly substrate-tolerant, high concen_x0002_tration of sucrose (86%), scalable catalytic system (scaled up 10 times), and sugarcane juice also give 62.5%, 70.1%, and 70.7% of HMF yield, respectively
HMF	Sugar cane		HMF yield (% from sg juice)	70.7
HMF	Sugar cane		HMF yield (g/g)	0.707
HMF	Sugar cane
HMF	Sugar cane
HMF	Sugar cane bagasse	Ref 1	https://www.sciencedirect.com/science/article/pii/S0959652622039555
HMF	Sugar cane bagasse		A consolidated bioprocess design to produce multiple high-value platform chemicals from lignocellulosic biomass and its technoeconomic feasibility - ScienceDirect
HMF	Sugar cane bagasse		Pretreatment (temperature; time)	Total solubilized sugar recovery (% gdw)	Total Structural sugar recovery (% gdw)	HMF (% gdw)	Furfurals (% gdw)	Acetic acid (% gdw)	Total recovery of bioproducts (% gdw)	HMF yield (% dw)	HMF yield (g/g)	average
HMF	Sugar cane bagasse		Untreated	0	34.68 ± 1.59	0	0	0	34.68 ± 1.59
HMF	Sugar cane bagasse		190 °C 10 min	7.59 ± 0.02	29.32 ± 0.24	3.79 ± 0.12	2.30 ± 0.02	4.99 ± 0.01	48.00 ± 0.41	3.79	0.0379	0.0738875
HMF	Sugar cane bagasse		190 °C 20 min	8.47 ± 0.41	27.43 ± 0.25	7.72 ± 0.22	6.36 ± 0.21	10.23 ± 0.31	60.21 ± 1.40	7.72	0.0772
HMF	Sugar cane bagasse		190 °C 30 min	4.22 ± 0.07	22.24 ± 0.22	8.10 ± 0.42	10.64 ± 0.57	13.41 ± 0.64	58.63 ± 1.92	8.1	0.081
HMF	Sugar cane bagasse		210 °C 10 min	1.65 ± 0.01	46.65 ± 2.21	8.67 ± 0.23	12.32 ± 0.12	14.73 ± 0.03	84.01 ± 2.60	8.67	0.0867
HMF	Sugar cane bagasse		210 °C 15 min	0.42 ± 0.03	45.22 ± 1.67	10.05 ± 0.02	12.33 ± 0.14	16.61 ± 0.47	84.64 ± 2.33	10.05	0.1005
HMF	Sugar cane bagasse		210 °C 20 min	0.38 ± 0.12	16.92 ± 1.41	6.41 ± 0.56	5.61 ± 0.42	17.05 ± 1.26	46.38 ± 3.77	6.41	0.0641
HMF	Sugar cane bagasse		210 °C 30 min	0.20 ± 0.01	13.65 ± 6.06	6.71 ± 0.23	6.27 ± 0.23	17.04 ± 0.51	43.88 ± 7.04	6.71	0.0671
HMF	Sugar cane bagasse		210 °C 40 min	0.24 ± 0.01	20.46 ± 0.38	7.66 ± 0.01	7.76 ± 0.05	17.64 ± 0.03	53.76 ± 0.48	7.66	0.0766
HMF	Sugar cane bagasse								MAX	10.05
HMF	Sugar cane bagasse								MIN	3.79
HMF	Sugar cane bagasse
HMF	Sugar cane bagasse	Ref 2	https://pubs.rsc.org/en/content/articlelanding/2016/cy/c6cy00820h#!
HMF	Sugar cane bagasse		High yield conversion of cellulosic biomass into 5-hydroxymethylfurfural and a study of the reaction kinetics of cellulose to HMF conversion in a biphasic system - Catalysis Science & Technology (RSC Publishing)
HMF	Sugar cane bagasse		Re_x0002_markable yields of 72% and 65% HMF were produced from sugarcane bagasse and rice husk, respectively
HMF	Sugar cane bagasse
HMF	Sugar cane bagasse
HMF	Sugar cane bagasse
HMF	Sugar cane bagasse
HMF	Sugar cane bagasse		Yield HMF (%)	72
HMF	Sugar cane bagasse		% C6 sugar in bagasse	70.84
HMF	Sugar cane bagasse		Molar mass c6 sugar	180.156
HMF	Sugar cane bagasse		Molar mass HMF	126.111
HMF	Sugar cane bagasse		Yield HMF (g/g)	0.357039
HMF	Sugar cane bagasse
HMF	Sugar cane bagasse	Ref 3	https://link.springer.com/article/10.1007/s12155-020-10113-y
HMF	Sugar cane bagasse		Chemometric Approach to Quantify 5-Hydroxymethylfurfural and Furfural Obtained from Sugarcane Bagasse and Peanut Hull by UV | BioEnergy Research (springer.com)
HMF	Sugar cane bagasse		The yield study obtained for peanut hull was 0.057% (w/w) (each ton produces 572.6 g of HMF), and for sugarcane ba_x0002_gasse, it was 0.989% (w/w) (each ton of sugarcane bagasse produces 10 kg of HMF).
HMF	Sugar cane bagasse		Yield (kg HMF/ton sbp)	10
HMF	Sugar cane bagasse		yield (g/g)	0.01
HMF	Sugar cane bagasse
HMF	Sugar cane bagasse	Ref 4	https://link.springer.com/article/10.1007/s10570-021-03764-3			Table 3
HMF	Sugar cane bagasse		Lignocellulosic biomass and carbohydrates as feed-stock for scalable production of 5-hydroxymethylfurfural | Cellulose (springer.com)
HMF	Sugar cane bagasse		Entry	Initial Feed	Initial Feed		HMF yield (wt%)	HMF yield (g/kg)				Yield (g/g)	average
HMF	Sugar cane bagasse		2c	Sugarcane	bagasse	55	39	140	47	30	80	0.14	0.115
HMF	Sugar cane bagasse		3c,d	sugarcane	bagasse	35	25	90	49	31	80	0.09
HMF	Sugar cane bagasse
HMF	Sugar cane bagasse	Ref 5	https://www.scielo.br/j/jbchs/a/M5YG7fyrmvY9DCk7yhtCyYd/#ModalFigf4
HMF	Sugar cane bagasse		SciELO - Brazil - Production of Furan Compounds from Sugarcane Bagasse Using a Catalytic System Containing ZnCl<sub>2</sub>/HCl or AlCl<sub>3</sub>/HCl in a Biphasic System Production of Furan Compounds from Sugarcane Bagasse Using a Catalytic System Containing ZnCl<sub>2</sub>/HCl or AlCl<sub>3</sub>/HCl in a Biphasic System
HMF	Sugar cane bagasse
HMF	Sugar cane bagasse
HMF	Sugar cane bagasse					Reference (10%)	72	px					average
HMF	Sugar cane bagasse					Native Bagasse a	25	px	3.47222	%wt	0.0347222	g/g	0.0694444
HMF	Sugar cane bagasse					SE Bagasse a	27	px	3.75	%wt	0.0375	g/g
HMF	Sugar cane bagasse					Native Bagasse b	61	px	8.47222	%wt	0.0847222	g/g
HMF	Sugar cane bagasse					SE Bagasse b	87	px	12.0833	%wt	0.120833	g/g
HMF	Sugar cane bagasse							MAX	12.0833
HMF	Sugar cane bagasse							MIN	3.47222
HMF	Sugar cane bagasse
HMF	Sugar cane bagasse
HMF	Sugar cane bagasse
HMF	Sugar cane bagasse
HMF	Sugar cane bagasse
HMF	Sugar cane molasses	Ref 1	https://www.sciencedirect.com/science/article/pii/S0926860X17303691
HMF	Sugar cane molasses		Production of 5-(hydroxymethyl)-furfural from water-soluble carbohydrates and sugarcane molasses - ScienceDirect
HMF	Sugar cane molasses		Compared to sucrose alone, lower HMF yields were obtained from sugarcane molasses (49.6 ± 0.4% for ZnCl2/HCl and 43.2 ± 1.0% for AlCl3/HCl) because part of the available sugars were found as glucose and fructose and these are less stable under the reaction conditions
HMF	Sugar cane molasses		HMF yield (%)	Sucrose %	Glucose %	Fructose %	Yield (g/g)	average
HMF	Sugar cane molasses		49.6	29.4	11.9	12.8	0.193668	0.181173
HMF	Sugar cane molasses		43.2				0.168679
HMF	Sugar cane molasses
HMF	Sugar cane molasses
FDCA	Sugar cane	theoretical	https://www.researchgate.net/figure/Theoretical-and-Overall-Yield-for-the-Conversion-of-Pure-Sugars-to-Ethylene-via-Ethanol_tbl6_259752935
FDCA	Sugar cane		Chemocatalytic Processes for the Production of Bio-Based Chemicals from Carbohydrates
FDCA	Sugar cane		theoretical yield FDCA from sugar g/g	0.867
FDCA	Sugar cane		fru+glu in Tomato %	28.91
FDCA	Sugar cane		theoretical yield FDCA from rice hull g/g	0.25065
FDCA	Sugar cane
FDCA	Sugar cane bagasse	theoretical	https://www.researchgate.net/figure/Theoretical-and-Overall-Yield-for-the-Conversion-of-Pure-Sugars-to-Ethylene-via-Ethanol_tbl6_259752935
FDCA	Sugar cane bagasse		Chemocatalytic Processes for the Production of Bio-Based Chemicals from Carbohydrates
FDCA	Sugar cane bagasse		theoretical yield FDCA from sugar g/g	0.867
FDCA	Sugar cane bagasse		fru+glu in Tomato %	70.84
FDCA	Sugar cane bagasse		theoretical yield FDCA from rice hull g/g	0.614183
FDCA	Sugar cane bagasse
FDCA	Sugar cane molasses	theoretical	https://www.researchgate.net/figure/Theoretical-and-Overall-Yield-for-the-Conversion-of-Pure-Sugars-to-Ethylene-via-Ethanol_tbl6_259752935
FDCA	Sugar cane molasses		Chemocatalytic Processes for the Production of Bio-Based Chemicals from Carbohydrates
FDCA	Sugar cane molasses		theoretical yield FDCA from sugar g/g	0.867
FDCA	Sugar cane molasses		fru+glu in Tomato %	55.65
FDCA	Sugar cane molasses		theoretical yield FDCA from rice hull g/g	0.482486
FDCA	Sugar cane molasses
Isoprene	Sugar cane	theoretical	glucose in Sugar cane	21.65
Isoprene	Sugar cane		yield (isoprene/Sugar cane)	0.036805
Isoprene	Sugar cane
Isoprene	Sugar cane bagasse	theoretical	glucose in Sugar cane bagasse	70.84
Isoprene	Sugar cane bagasse		yield (isoprene/Sugar cane b)	0.120428
Isoprene	Sugar cane bagasse
Isoprene	Sugar cane molasses	theoretical	glucose in Sugar cane molasses	27.37
Isoprene	Sugar cane molasses		yield (isoprene/Sugar cane m)	0.046529
Isoprene	Sugar cane molasses
Succinic Acid	Sugar cane	ref 1	https://link.springer.com/article/10.1007/s12355-015-0401-2
Succinic Acid	Sugar cane		Economical Succinic Acid Production from Sugarcane Juice by Actinobacillus succinogenes Supplemented with Corn Steep Liquor and Peanut Meal as Nitrogen Sources
Succinic Acid	Sugar cane
Succinic Acid	Sugar cane		Table 1 Effects of initial total sugars of sugarcane juice concentration on the succinic production
Succinic Acid	Sugar cane		Initial total sugars of SCJ (g/L) 50 60 70 80 90
Succinic Acid	Sugar cane		Succinic acid (g/L) 37.08 ± 0.4 45.57 ± 0.6 54.62 ± 0.2 52.33 ± 0.3 41.19 ± 0.4
Succinic Acid	Sugar cane		Acetic acid (g/L) 4.51 ± 0.2 5.57 ± 0.4 6.62 ± 0.3 6.21 ± 0.4 5.04 ± 0.5
Succinic Acid	Sugar cane		Formic acid (g/L) 0.81 ± 0.5 0.93 ± 0.3 1.12 ± 0.5 1.03 ± 0.3 0.89 ± 0.4				Succinic acid yield was
Succinic Acid	Sugar cane		Cell concentration (OD660) 6.32 ± 0.8 6.85 ± 0.6 6.56 ± 0.8 6.31 ± 0.7 5.45 ± 0.5				defined as the amount of final succinic acid from one gram
Succinic Acid	Sugar cane		Residual total sugar (g/L) 3.85 ± 0.2 5.93 ± 0.3 6.34 ± 0.4 9.67 ± 0.3 28.37 ± 0.2				sugar consumed, and expressed as a percentage
Succinic Acid	Sugar cane		Succinic acid yield (%) 74.16 ± 0.4 75.95 ± 0.2 78.03 ± 0.4 65.41 ± 0.5 45.77 ± 0.3
Succinic Acid	Sugar cane		Total sugar utilization (%) 80.35 ± 0.3 84.28 ± 0.5 85.80 ± 0.6 74.41 ± 0.3 66.83 ± 0.4
Succinic Acid	Sugar cane
Succinic Acid	Sugar cane		Succinic acid yield (%) g/g sugar consumed	74.16
Succinic Acid	Sugar cane			75.95
Succinic Acid	Sugar cane			78.03
Succinic Acid	Sugar cane			65.41
Succinic Acid	Sugar cane			45.77
Succinic Acid	Sugar cane		avrg	67.864
Succinic Acid	Sugar cane		glu+fru in suarcane	28.9099
Succinic Acid	Sugar cane		yield g/g sugarcane	0.196194
Succinic Acid	Sugar cane
Succinic Acid	Sugar cane
Succinic Acid	Sugar cane	ref 2	https://www.sciencedirect.com/science/article/pii/S1878818122001013?casa_token=lcsD2luuiMoAAAAA:vlJMbzQYVmhyG1HUNkeo1C9N4gNYO4MbU_P2YawXe8_OKkZukWqS8vICy9SNTzMjSgHqZwk#sec3
Succinic Acid	Sugar cane		Optimization of alkaline-assisted organosolv pretreatment of sugarcane trash for the production of succinic acid using response surface methodology
Succinic Acid	Sugar cane		The maximum succinic acid concentration (41.39 g/L) was obtained at the end of fermentation (48 h) with residual glucose of 2.03 g/L.
Succinic Acid	Sugar cane		The SCT hydrolysate containing a high amount of sugar was diluted to 50 g/L in other to start fermentation using A. succinogenes TISTR 1994T based on the result from glucose optimization for succinic acid production.
Succinic Acid	Sugar cane
Succinic Acid	Sugar cane		sugar used g/L	47.97
Succinic Acid	Sugar cane		SA g/L	41.39
Succinic Acid	Sugar cane		yield gSA/g sugar	0.862831
Succinic Acid	Sugar cane		sugar in sugarcane	19.8483
Succinic Acid	Sugar cane		yield gSA/g sugarcane	0.171257
Succinic Acid	Sugar cane
Succinic Acid	Sugar cane	ref 3	https://www.nature.com/articles/s41467-023-41616-9#Tab1
Succinic Acid	Sugar cane		An end-to-end pipeline for succinic acid production at an industrially relevant scale using Issatchenkia orientalis
Succinic Acid	Sugar cane		Table 1 High succinic acid production by metabolically engineered microorganisms
Succinic Acid	Sugar cane
Succinic Acid	Sugar cane		From: An end-to-end pipeline for succinic acid production at an industrially relevant scale using Issatchenkia orientalis
Succinic Acid	Sugar cane		Microorganism	Titer (g/L)	Yield (g/g glucose equivalent)	Productivity (g/L/h)	Medium	pH/neutralizers	Mode	Working volume (L)/Reactor size (L)	Reference
Succinic Acid	Sugar cane		M. succiniciproducens	134.25	0.82	21.3	CDM with glucose and glycerol	6.5/ammonia and Mg(OH)2 solutions	Fed-batch	2.5/6.6	6
Succinic Acid	Sugar cane		E. coli	113.95	0.91	3.25	Corn stalk hydrolysate supplemented with yeast extract	6.6–7.0/Mg(OH)2 and NH3·H2O	Fed-batch	1.2/3.0	66
Succinic Acid	Sugar cane		C. glutamicum	134	1.1	2.53	NaCl solution with glucose and formate	6.9/KOH	Fed-batch	0.45/1.4	67
Succinic Acid	Sugar cane		Y. lipolytica	101.4	0.37	0.7	YP with glucose	5.5/unspecified	Fed-batch	Unspecified/1.0	11
Succinic Acid	Sugar cane		Y. lipolytica	110.7	0.53	0.8	YP with glycerol	No neutralizer; final pH 3.4	Fed-batch	1.0/2.5	10
Succinic Acid	Sugar cane		I. orientalis	109.5	0.65	0.54	SC-URA with glucose and glycerol	3.0/KOH	Fed-batch	0.1/0.35	This study
Succinic Acid	Sugar cane		I. orientalis	104.6	0.63	1.25	Sugarcane juice	3.0/KOH	Fed-batch	0.1/0.35	This study
Succinic Acid	Sugar cane		I. orientalis	63.1	0.5	0.66	Sugarcane juice	3.0/ammonia solution	Batch	30/75	This study
Succinic Acid	Sugar cane			avrg	0.565
Succinic Acid	Sugar cane			sugar in sugarcane	19.8483
Succinic Acid	Sugar cane			yield gSA/g sugarcane	0.112143
Succinic Acid	Sugar cane
Succinic Acid	Sugar cane bagasse
Succinic Acid	Sugar cane bagasse	ref 1	https://link.springer.com/article/10.1007/s00449-013-0953-z#Tab2
Succinic Acid	Sugar cane bagasse		Ultrasonic pretreatment and acid hydrolysis of sugarcane bagasse for succinic acid production using Actinobacillus succinogenes
Succinic Acid	Sugar cane bagasse
Succinic Acid	Sugar cane bagasse
Succinic Acid	Sugar cane bagasse		Table 2 Effect of the total sugar concentration on succinic acid production
Succinic Acid	Sugar cane bagasse		From: Ultrasonic pretreatment and acid hydrolysis of sugarcane bagasse for succinic acid production using Actinobacillus succinogenes
Succinic Acid	Sugar cane bagasse		Total sugar concentration (g/L)	DCW (g/L)	Succinic acid (g/L)	Formic acid (g/L)	Acetic acid (g/L)	Succinic acid yield (%)
Succinic Acid	Sugar cane bagasse		10	2.14 ± 0.21a	7.8 ± 0.4	1.0 ± 0.1	2.3 ± 0.3	78.0 ± 0.4
Succinic Acid	Sugar cane bagasse		20	3.43 ± 0.16	16.9 ± 1.2	2.9 ± 0.2	7.7 ± 0.8	84.5 ± 0.7
Succinic Acid	Sugar cane bagasse		30	4.28 ± 0.27	19.7 ± 1.0	3.1 ± 0.2	9.0 ± 0.5	65.7 ± 1.2
Succinic Acid	Sugar cane bagasse		40	2.37 ± 0.13	12.5 ± 0.9	1.2 ± 0.1	4.6 ± 0.2	31.3 ± 0.7
Succinic Acid	Sugar cane bagasse		50	1.56 ± 0.19	4.6 ± 0.5	0.7 ± 0.1	8.3 ± 0.3	9.2 ± 0.3
Succinic Acid	Sugar cane bagasse		Cells were grown in anaerobic bottles with different total sugar concentrations for 48 h
Succinic Acid	Sugar cane bagasse		aEach value is an average of three parallel replicates and is represented as mean ± standard deviation
Succinic Acid	Sugar cane bagasse
Succinic Acid	Sugar cane bagasse		yield g/g sugar	78
Succinic Acid	Sugar cane bagasse			84.5
Succinic Acid	Sugar cane bagasse			65.7
Succinic Acid	Sugar cane bagasse			31.3
Succinic Acid	Sugar cane bagasse			9.2
Succinic Acid	Sugar cane bagasse		avrg	53.74
Succinic Acid	Sugar cane bagasse		sugar in sugarcane bagasse	77.3193
Succinic Acid	Sugar cane bagasse		yield g/g sugarcane bagasse	0.415514
Succinic Acid	Sugar cane bagasse
Succinic Acid	Sugar cane bagasse	ref 2	https://academic.oup.com/jimb/article/38/8/1001/5994396
Succinic Acid	Sugar cane bagasse		Succinic acid production from sugarcane bagasse hemicellulose hydrolysate by Actinobacillus succinogenes
Succinic Acid	Sugar cane bagasse
Succinic Acid	Sugar cane bagasse		Results of the fermentation process for succinic acid production carried out in a bioreactor under controlled conditions (37°C, pH 7.0, 150 rpm)
Succinic Acid	Sugar cane bagasse		Fermentation process	Conditions		Maximum values
Succinic Acid	Sugar cane bagasse			So (g l−1)	Time (h)	Low CO2 tension				High CO2 tension
Succinic Acid	Sugar cane bagasse					AS (g l−1)	Q P (g l−1 h−1)	Y P/S (g/g)	E f (%)	AS (g/l)	Y P/S (g g−1)	E f (%)	Q p (g l−1 h−1)
Succinic Acid	Sugar cane bagasse		Synthetic medium	22	24	10.04	0.47	0.45	58.4	14.2	0.64	82.8	0.67
Succinic Acid	Sugar cane bagasse		Hydrolysate	52	24	18.5	0.9	0.35	45.6	22.5	0.43	55.4	1.01
Succinic Acid	Sugar cane bagasse		S 0 Initial xylose concentration (g l−1), AS succinic acid (g l−1), Q P productivity (g l−1 h−1), Y P/S product yield in relation to the substrate, E f efficiency
Succinic Acid	Sugar cane bagasse		succinic acid yield was defined as the amount of succinic acid produced from 1 g of xylose (expressed as a percentage).
Succinic Acid	Sugar cane bagasse		yield g/g xylose	0.39
Succinic Acid	Sugar cane bagasse		xylose in sugarcane bagasse	12.5101
Succinic Acid	Sugar cane bagasse		yield g/g sugarcane bagasse	0.0487896
Succinic Acid	Sugar cane bagasse
Succinic Acid	Sugar cane bagasse	ref 3	https://www.sciencedirect.com/science/article/pii/S096085241730809X?casa_token=bLKGiNWU0BMAAAAA:QJa_ZpGXFvDGvSth9KHLNquMjPW-13VIhm8DOvEqyi5bopp3JkRAuEhkD1-1U4riEtP3Lwg
Succinic Acid	Sugar cane bagasse		Characterization of a β-glucosidase from Paenibacillus species and its application for succinic acid production from sugarcane bagasse hydrolysate
Succinic Acid	Sugar cane bagasse
Succinic Acid	Sugar cane bagasse		The final succinic acid concentration reached 26.50 g·L−1 with a yield of 0.88 g·g−1 cellobiose and 24.30 g·L−1 with a yield of 0.81 g·g−1 total sugar, respectively.
Succinic Acid	Sugar cane bagasse
Succinic Acid	Sugar cane bagasse		yield g/g tot sugar	0.81
Succinic Acid	Sugar cane bagasse		tot sugar in sugarcane bagasse	77.3193
Succinic Acid	Sugar cane bagasse		yield g/g tot sugarcane bagasse	0.626286
Succinic Acid	Sugar cane bagasse
Succinic Acid	Sugar cane bagasse	ref 4	https://www.sciencedirect.com/science/article/pii/S0960852413014831?casa_token=P13LkwXWp-YAAAAA:XkFECrqCkYh4WfnPql-Xa_X8BUrJCgMOcgm-QUWn-npMdfX2RN596xT1q98FyPeRAxQXWBo
Succinic Acid	Sugar cane bagasse		Efficient succinic acid production from lignocellulosic biomass by simultaneous utilization of glucose and xylose in engineered Escherichia coli
Succinic Acid	Sugar cane bagasse
Succinic Acid	Sugar cane bagasse		The succinic acid concentration reached 5.3 g L−1 and the yield of succinic acid was 0.46 g g−1 total sugars (Fig. 3A).
Succinic Acid	Sugar cane bagasse		The yield of succinic acid in BA305 was 0.66 g g−1 total sugars which was 43% higher than that in BA204, and the sugar consumption rate was 34% higher than that in BA204 due to simultaneous utilization of the sugars in BA305.
Succinic Acid	Sugar cane bagasse
Succinic Acid	Sugar cane bagasse		yield g/g tot sugar	0.46
Succinic Acid	Sugar cane bagasse			0.66
Succinic Acid	Sugar cane bagasse		avrg	0.56
Succinic Acid	Sugar cane bagasse		tot sugar in sugarcane bagasse	77.3193
Succinic Acid	Sugar cane bagasse		yield g/g tot sugarcane bagasse	0.432988
Succinic Acid	Sugar cane bagasse
Succinic Acid	Sugar cane bagasse	ref 5	https://www.sciencedirect.com/science/article/pii/S0960852412015210?casa_token=4jsm4Bw_dosAAAAA:0wNVsgfeB2TW7rtOZmGULsRXcl6b1jDKk-7ooQu9UQfCp1j6_4hlLcVXko-qUFyfKjdZdWE#t0015
Succinic Acid	Sugar cane bagasse		Succinic acid production from cellobiose by Actinobacillus succinogenes
Succinic Acid	Sugar cane bagasse		In batch fermentation with 18 g/l of cellobiose and 17 g/l of other sugars from sugarcane bagasse cellulose hydrolysates, a succinic acid concentration of 20.0 g/l was obtained, with a corresponding yield of 64.7%.
Succinic Acid	Sugar cane bagasse
Succinic Acid	Sugar cane bagasse		yield (g/g tot sugar)	0.647
Succinic Acid	Sugar cane bagasse		tot sugar in sugarcane bagasse	77.3193
Succinic Acid	Sugar cane bagasse		yield g/g tot sugarcane bagasse	0.500256
Succinic Acid	sugarcane molasses
Succinic Acid	sugarcane molasses
Succinic Acid	sugarcane molasses	ref 1	Production of succinic acid from sucrose and sugarcane molasses by metabolically engineered Escherichia coli
Succinic Acid	sugarcane molasses		https://www.sciencedirect.com/science/article/pii/S0960852411013848?casa_token=24Py_gt2_bgAAAAA:SYA1hM30BO6HFD-bCHt6kBOJcmCiXB0lI5eUU4KDzcg1ROG2d1U-ErPZX4BLZIHBnfMMOh4
Succinic Acid	sugarcane molasses
Succinic Acid	sugarcane molasses		Table 3. Comparisons of succinate production from sucrose and sugarcane molasses by biocatalysts.
Succinic Acid	sugarcane molasses		Organism	Medium/condition	Succinate				Reference
Succinic Acid	sugarcane molasses				Titer (g/L)	Yielda (g/g)	Productivityb (g/L/h)	Specific productivityc (g/gCDW/h)
Succinic Acid	sugarcane molasses		KJ122-pKJSUC-24T (cscKB and cscA from E. coli KO11)	150 g/L Sugarcane molasses with 10 g/L KHCO3, 10 L bioreactor simple batch fermentation, 72 h incubation, pH maintained with 1:1 mixture of 6 M KOH + 3 M K2CO3	55.8	0.96	0.77	0.325	This study
Succinic Acid	sugarcane molasses		KJ122-pKJSUC-24T (cscKB and cscA from E. coli KO11)	70 g/L Sucrose with 10 g/L KHCO3, 10 L bioreactor with simple batch fermentation, 72 h incubation, pH maintained with 1:1 mixture of 6 M KOH + 3 M K2CO3	53.4	0.9	0.74	0.409	This study
Succinic Acid	sugarcane molasses		E. coli SBS550MG transformed with pHL413 (pyc from L. lactis) pUR400 (scrKYABR from E. coli K12)	Sucrose, 20 g/L peptone, 10 g/L yeast extract, 1.0 mg/L biotin, and 1.0 mg/L thiamine, 100 mg/L ampicillin supplemented in a complex medium, fed batch (dual-phase fermentation), 90 h incubation, 0.2 L/min CO2 for maintenance of anaerobic conditions, pH maintained at 7.0 with 2.0 M Na2CO3	32.7	0.77	0.34	0.141	Wang et al., 2011
Succinic Acid	sugarcane molasses		E. coli isolated from the rumen of buffalo	Sugarcane molasses (10% (v/v)) supplemented to 10% CSL, 20 mM NaCO3, CO2 providing, 72 h incubation time	17	0.34	0.56	0.288	Agarwal et al., 2006
Succinic Acid	sugarcane molasses		A. succinogenes CGMCC1593	Sugarcane molasses supplemented to AS medium, 15 g/L yeast extract, 0.05 vvm CO2 gas, 5 L bioreactor fed-batch fermentation, 48 h incubation, pH controlled at 7.0 by 3.0 M Na2CO3	55.2	NAd	1.15	0.493	Liu et al., 2008
Succinic Acid	sugarcane molasses		A. succinogenes CGMCC1593	Sugarcane molasses (65 g/L of sugar mixture) supplemented to AS medium, 15 g/L yeast extract, and MgCO3, anaerobic bottles, batch fermentation, 60 h incubation	45.2	0.79	0.75	NA	Liu et al., 2008
Succinic Acid	sugarcane molasses		A. succinogenes CGMCC1593	Sucrose (50 g/L) supplemented to AS medium, 15 g/L yeast extract, and MgCO3, anaerobic bottles, batch fermentation, 60 h incubation	40.3
Succinic Acid	sugarcane molasses
Succinic Acid	sugarcane molasses		a	The succinate yield was calculated as grams of succinate produced divided by grams of the sugar consumed.
Succinic Acid	sugarcane molasses		b	The succinate productivity was calculated as succinate concentration produced divided by overall incubation time.
Succinic Acid	sugarcane molasses		c	The specific succinate productivity was calculated on the basis of the cell concentration (gram cell dry weight; gCDW) at the moment of taking sample.
Succinic Acid	sugarcane molasses		d	ND = No data was available.
Succinic Acid	sugarcane molasses
Succinic Acid	sugarcane molasses		yield g/g sugar consumed	0.696667
Succinic Acid	sugarcane molasses		tot sugar in sugarcane molasses	55.6474
Succinic Acid	sugarcane molasses		yield g/g tot sugarcane molasses	0.387677
Succinic Acid	sugarcane molasses
Succinic Acid	sugarcane molasses	ref 2	https://www.sciencedirect.com/science/article/pii/S1369703X14002319?casa_token=B_222GSyp9IAAAAA:ZGvgnWAdT6ozgL0TOD2O1_hCpjJlhbd0dVQdmjJVq9XWRRbwwkNEDLFlyZNgLZKzZNU1Yqk#tbl0020
Succinic Acid	sugarcane molasses		Succinic acid production from sucrose and molasses by metabolically engineered E. coli using a cell surface display system - ScienceDirect (wur.nl)
Succinic Acid	sugarcane molasses
Succinic Acid	sugarcane molasses		The yield of succinic acid was 1.20 mol mol−1 hexose.
Succinic Acid	sugarcane molasses		hexose in sugarcane molasses	55.6474
Succinic Acid	sugarcane molasses		yield g/g sugarcane molasses	0.437759
3-HP	Sugar cane	theoretical	yield g/g sugar	0.2365
3-HP			glucose in Sugar cane	19.8483
3-HP			yield (3-HP/Sugar cane)	0.0469413
3-HP
3-HP	Sugar cane bagasse	theoretical	yield g/g sugar	0.2365
3-HP			glucose in Sugar cane bagasse	64.8091
3-HP			yield (3-HP/Sugar cane bagasse)	0.153274
3-HP
3-HP
3-HP	sugarcane molasses	theoretical	yield g/g sugar	0.2365
3-HP			glucose in sugarcane molasses	27.3737
3-HP			yield (3-HP/Sugar cane molasses)	0.0647388
levulinic acid	Sugar cane	theoretical	Theoretical yield (g/g hexos)	0.521033
levulinic acid	Sugar cane		glu+fru Sugar cane (g/100g)	27.1088
levulinic acid	Sugar cane		Theoretical yield (g/g Sugar cane)	0.141246
levulinic acid	Sugar cane bagasse	ref 1	https://www.sciencedirect.com/science/article/pii/S1385894712015884
levulinic acid	Sugar cane bagasse		A kinetic study of acid catalysed hydrolysis of sugar cane bagasse to levulinic acid
levulinic acid	Sugar cane bagasse
levulinic acid	Sugar cane bagasse		The highest LA yield was obtained at 150 °C and 0.55 M H2SO4 at 63 mol%, which equates to the production of 194 kg of LA from 1 dry tonne of sugar cane bagasse.
levulinic acid	Sugar cane bagasse
levulinic acid	Sugar cane bagasse		yield g/g	0.194
levulinic acid	Sugar cane bagasse
levulinic acid	Sugar cane bagasse	ref 2	https://pubs.rsc.org/en/content/articlehtml/2014/ra/c4ra06246a
levulinic acid	Sugar cane bagasse		Levulinic acid production from Cicer arietinum, cotton, Pinus radiata and sugarcane bagasse
levulinic acid	Sugar cane bagasse
levulinic acid	Sugar cane bagasse		Under optimal reaction conditions (423 K, 1 M HCl, 2 h) the yields of levulinic acid obtained from Cicer arietinum, cotton, Pinus radiata and sugarcane bagasse were 32.6, 44.0, 19.0 and 36.5 wt%.
levulinic acid	Sugar cane bagasse
levulinic acid	Sugar cane bagasse		yield g/g	0.365
levulinic acid	Sugar cane bagasse
levulinic acid	Sugar cane bagasse	ref 3	https://link.springer.com/article/10.1007/s12649-020-01221-z
levulinic acid	Sugar cane bagasse		Optimization of Levulinic Acid Production from Depithed Sugarcane Bagasse in 1- Ethyl-3-methylimidazolium hydrogen sulfate [EMim][HSO4]
levulinic acid	Sugar cane bagasse
levulinic acid	Sugar cane bagasse		The optimum conditions were found to be 100 °C, 7 h, and 4 g of IL, which yielded 54.6% of LA from DSB.
levulinic acid	Sugar cane bagasse
levulinic acid	Sugar cane bagasse		LA yield wt%	54.6
levulinic acid	Sugar cane bagasse		Cellulose content %	54.87
levulinic acid	Sugar cane bagasse		Yth	38.9577
levulinic acid	Sugar cane bagasse		Yact	0.151023
levulinic acid	Sugar cane bagasse
levulinic acid	Sugar cane bagasse
levulinic acid	Sugar cane bagasse	ref 4	Production of Levulinic Acid from Bagasse andPaddy Straw by Liquefaction in the Presence ofHydrochloride Acid
levulinic acid	Sugar cane bagasse		https://onlinelibrary.wiley.com/doi/abs/10.1002/clen.200700100
levulinic acid	Sugar cane bagasse
levulinic acid	Sugar cane bagasse		Maximum yields of 23.7 and 22.8% levulinic acid were reached at2208C, 45 min of reaction time, and 4.45% of hydrochloride acid byweight for paddy straw and bagasse, respectively.
levulinic acid	Sugar cane bagasse
levulinic acid	Sugar cane bagasse		yield wt%	22.8
levulinic acid	Sugar cane bagasse
levulinic acid	Sugar cane bagasse	ref 5	Kinetic insights into the lignocellulosic biomass-based levulinic acid production by a mechanistic model | Cellulose (wur.nl)
levulinic acid	Sugar cane bagasse		https://link.springer.com/article/10.1007/s10570-020-03183-w
levulinic acid	Sugar cane bagasse
levulinic acid	Sugar cane bagasse		Thereby, a
levulinic acid	Sugar cane bagasse		satisfactory concordance was reached between the
levulinic acid	Sugar cane bagasse		high yields of LA of 61.1 mol%, 67.7 mol% and
levulinic acid	Sugar cane bagasse		61.4 mol% calculated by the model, and the experimental
levulinic acid	Sugar cane bagasse		yields of 60.5 ± 2.1 mol%, 65.2 ± 2.9 mol%
levulinic acid	Sugar cane bagasse		and 61.5 ± 4.0 mol% (under optimum conditions of
levulinic acid	Sugar cane bagasse		190 _x0003_C, 7.0% w/v of H2SO4, 75 min) for SCB, RH and
levulinic acid	Sugar cane bagasse		SS, respectively.
levulinic acid	Sugar cane bagasse
levulinic acid	Sugar cane bagasse		yield mol %	60.5
levulinic acid	Sugar cane bagasse		glucose in Sugar cane bagasse	64.8091
levulinic acid	Sugar cane bagasse		yield g/g	0.252699
levulinic acid	sugarcane molasses	ref 1	https://pubs.acs.org/doi/full/10.1021/acs.energyfuels.7b03987
levulinic acid	sugarcane molasses		Concentrated Levulinic Acid Production from Sugar Cane Molasses
levulinic acid	sugarcane molasses
levulinic acid	sugarcane molasses		Table 1. Comparison of the One-Pot Batch Reaction and Superimposed Reactions
levulinic acid	sugarcane molasses		reaction condition	total cane molasses used for 1 L reaction solution (g)	average yield of LA (wt %)	average yield of formic acid (wt %)
levulinic acid	sugarcane molasses		first run of the superimposed reaction	184	36.5 ± 0.4	13.5 ± 0.3
levulinic acid	sugarcane molasses		first two runs of the superimposed reaction	368 (=184 × 2)	33.8 ± 0.5	11.6 ± 0.4
levulinic acid	sugarcane molasses		first three runs of the superimposed reaction	552 (=184 × 3)	30.5 ± 0.7	10.1 ± 0.4
levulinic acid	sugarcane molasses		first four runs of the superimposed reaction	736 (=184 × 4)	26.6 ± 1.1	8.1 ± 0.4
levulinic acid	sugarcane molasses		first five runs of the superimposed reaction	920 (=184 × 5)	23.9 ± 1.3	6.7 ± 0.4
levulinic acid	sugarcane molasses		one-pot batch reaction of 277 g/L cane molasses	277	29.2 ± 0.9	11.2 ± 0.3
levulinic acid	sugarcane molasses		one-pot batch reaction of 368 g/L cane molasses	368	24.8 ± 1.0	9.1 ± 0.4
levulinic acid	sugarcane molasses		one-pot batch reaction of 552 g/L cane molasses	552	18.1 ± 1.
levulinic acid	sugarcane molasses
levulinic acid	sugarcane molasses				36.5
levulinic acid	sugarcane molasses				33.8
levulinic acid	sugarcane molasses				30.5
levulinic acid	sugarcane molasses				26.6
levulinic acid	sugarcane molasses				23.9
levulinic acid	sugarcane molasses				29.2
levulinic acid	sugarcane molasses				24.8
levulinic acid	sugarcane molasses				18.1
levulinic acid	sugarcane molasses			avrg	27.925
levulinic acid	sugarcane molasses			yield g/g	0.27925
levulinic acid	sugarcane molasses
lactic acid	Sugar cane	ref 1	https://link.springer.com/article/10.1007/s10098-011-0448-z
lactic acid	Sugar cane		Fermentative lactic acid production from a renewable carbon source under response surface optimized conditions without alkali addition: a membrane-based green approach
lactic acid	Sugar cane
lactic acid	Sugar cane		Table 2 Fermentative production indicators under varying feed dilutions at specific time periods
lactic acid	Sugar cane		From: Fermentative lactic acid production from a renewable carbon source under response surface optimized conditions without alkali addition: a membrane-based green approach
lactic acid	Sugar cane		Total sugar concentration (g l−1)	Total residual sugar after 72 h (g l−1)	Specific growth rate at 18th (hr−1)	Lactic acid concentration (g l−1)	% Yieldsp/s	Productivity at 72 h (g l−1 h−1)
lactic acid	Sugar cane		146	20.9	0.028	116.28	92.98	1.62
lactic acid	Sugar cane		131.4	18.02	0.044	106.69	94.12	1.49
lactic acid	Sugar cane		102.2	16.35	0.046	82.4	96	1.15
lactic acid	Sugar cane		87.6	11.58	0.045	72.74	95.7	1.01
lactic acid	Sugar cane		73	7.72	0.066	61.87	94.8	0.86
lactic acid	Sugar cane					avrg	94.72
lactic acid	Sugar cane		yield g/g tot sugar	0.9472
lactic acid	Sugar cane		tot sugar in sugarcane	30.8422
lactic acid	Sugar cane		yield g/g sugarcane	0.292137
lactic acid	Sugar cane
lactic acid	Sugar cane
lactic acid	Sugar cane	ref 2	https://onlinelibrary.wiley.com/doi/full/10.1002/apj.1806
lactic acid	Sugar cane		Kinetic of lactic acid production from sugarcane juice using Lactobacillus plantarum
lactic acid	Sugar cane
lactic acid	Sugar cane		Stoichiometric parameters have been estimated to be the maximum product yield coefficient YPS, 0.83 g, lactic acid/g sucrose and average cell mass yield coefficient Yxs, 0.47.
lactic acid	Sugar cane
lactic acid	Sugar cane			g LA/g sucrose	0.83
lactic acid	Sugar cane			sucrose in sugarcane	12.75
lactic acid	Sugar cane			g LA/g sugarcane	0.105825
lactic acid	Sugar cane
lactic acid	Sugar cane
lactic acid	Sugar cane	ref3	Lactic acid production from sugar-cane juice by a newly isolated Lactobacillus
lactic acid	Sugar cane		https://link.springer.com/article/10.1007/s10529-006-9003-0
lactic acid	Sugar cane
lactic acid	Sugar cane		% yield p/s	96	90
lactic acid	Sugar cane		sugar in sugarcane	30.8422	30.8422
lactic acid	Sugar cane		g LA/g sugarcane	0.296085	0.27758
lactic acid	Sugar cane		avrg	0.286832
lactic acid	Sugar cane
lactic acid	Sugar cane
lactic acid	Sugar cane	ref 4	Modelling and simulation of continuous L (+) lactic acid production from sugarcane juice in membrane integrated hybrid-reactor system
lactic acid	Sugar cane		https://www.sciencedirect.com/science/article/pii/S1369703X13001964#tbl0010
lactic acid	Sugar cane
lactic acid	Sugar cane		The yield (Yps) of the product on substrate consumptions at different cross flow velocities were experimentally calculated as 0.96 g/g, 0.94 g/g and 0.92 g/g, respectively.
lactic acid	Sugar cane
lactic acid	Sugar cane		y ps	0.96
lactic acid	Sugar cane			0.94
lactic acid	Sugar cane			0.92
lactic acid	Sugar cane		avrg g/g tot sugar	0.94
lactic acid	Sugar cane		sugar in sugarcane	30.8422
lactic acid	Sugar cane		yield g/g sugarcane	0.289917
lactic acid	Sugar cane
lactic acid	Sugar cane
lactic acid	Sugar cane	ref 5	Lactic acid production from sugarcane field residue as renewable and economical bioresource by newly isolated Pediococcus pentosaceus HLV1 | SpringerLink (wur.nl)
lactic acid	Sugar cane		https://link.springer.com/article/10.1007/s13399-022-03267-6
lactic acid	Sugar cane
lactic acid	Sugar cane		As shown in Fig. 5b, the strain P. pentosaceus HLV1 produced a good amount of lactic acid 61.90 g/L with a yield of 1.12 g of lactic acid/g of the substrate and 0.86 g/L/h productivity.
lactic acid	Sugar cane
lactic acid	Sugar cane
lactic acid	Sugar cane
lactic acid	Sugar cane		yield	1.12
lactic acid	Sugar cane		sugar in sugarcane	30.8422
lactic acid	Sugar cane		yield g/g sugarcane	0.345433
lactic acid	Sugar cane
lactic acid
lactic acid	Sugar cane bagasse	ref 1	Acid hydrolysis of sugarcane bagasse for lactic acid production
lactic acid	Sugar cane bagasse		https://www.sciencedirect.com/science/article/pii/S0960852409011584
lactic acid	Sugar cane bagasse
lactic acid	Sugar cane bagasse		The results showed that 7 g l−1 of yeast extract gave the highest yield of lactic acid (0.26 g lactic per g sugar utilised), while microbial growth and lactic acid production were not detected in the broth containing ammonium sulphate at all concentrations (data not shown).
lactic acid	Sugar cane bagasse
lactic acid	Sugar cane bagasse		yield g/g tot sugar	0.26
lactic acid	Sugar cane bagasse		tot sugar in sugarcane bagasse	77.3193
lactic acid	Sugar cane bagasse		yield g/g sugarcane	0.20103
lactic acid	Sugar cane bagasse
lactic acid	Sugar cane bagasse	ref 2	Enhanced cellulosic d-lactic acid production from sugarcane bagasse by pre-fermentation of water-soluble carbohydrates before acid pretreatmen
lactic acid	Sugar cane bagasse		https://www.sciencedirect.com/science/article/pii/S0960852422016571
lactic acid	Sugar cane bagasse
lactic acid	Sugar cane bagasse		Consequently, a higher d-lactic acid titer (57.0 g/L vs 33.2 g/L) was achieved from the whole slurry of the undetoxified and pretreated sugarcane bagasse by one-pot simultaneous saccharification and co-fermentation (SSCF), with the overall yield of 0.58 g/g dry bagasse.
lactic acid	Sugar cane bagasse
lactic acid	Sugar cane bagasse		g/g dry bagasse	0.58
lactic acid	Sugar cane bagasse		DM in sugarcane bagasse	0.91	https://www.foodwasteexplorer.eu/byWasteStream?foodname=&wastestream=Sugar%20cane%20bagasse&compgroup=&ftc=Dry%20Matter
lactic acid	Sugar cane bagasse		yield g/g sugarcane	0.5278
lactic acid	Sugar cane bagasse
lactic acid	Sugar cane bagasse	ref 3	https://www.sciencedirect.com/science/article/pii/S2589014X1930026X
lactic acid	Sugar cane bagasse		Polymer grade l-lactic acid production from sugarcane bagasse hemicellulosic hydrolysate using Bacillus coagulans
lactic acid	Sugar cane bagasse
lactic acid	Sugar cane bagasse		In this work, a Bacillus coagulans strain is evaluated as an l-lactic acid producer using sugarcane bagasse hemicellulosic hydrolysate. l-Lactic acid production reached 55.99 g/L, 0.87 g/g of yield, 1.7 g/ L h −1 of productivity and 99.4% of isomeric purity.
lactic acid	Sugar cane bagasse		Yield = lactic acid (g) / total sugar consumed (g).
lactic acid	Sugar cane bagasse		yield g/g	0.87
lactic acid	Sugar cane bagasse		tot sugar in sugarcane bagasse	77.3193
lactic acid	Sugar cane bagasse		yield g/g sugarcane	0.672678
lactic acid	Sugar cane bagasse
lactic acid	Sugar cane bagasse
lactic acid	Sugar cane bagasse	ref 4	Assessment of multiple pretreatment strategies for 2G L-lactic acid production from sugarcane bagasse | SpringerLink (wur.nl)
lactic acid	Sugar cane bagasse		https://link.springer.com/article/10.1007/s13399-020-01163-5
lactic acid	Sugar cane bagasse
lactic acid	Sugar cane bagasse		From 100.0 g of SCB, L-lactic acid production of 26.16 g, 8.78 g, 14.15 g, 14.33 g, and 24.61 g in alkali, acid, sequential acid-alkali, sequential alkali-acid, and cavitation with alkali pretreatment was obtained, respectively.
lactic acid	Sugar cane bagasse
lactic acid	Sugar cane bagasse		g/100gscb	26.16
lactic acid	Sugar cane bagasse			8.78
lactic acid	Sugar cane bagasse			14.15
lactic acid	Sugar cane bagasse			14.33
lactic acid	Sugar cane bagasse			24.61
lactic acid	Sugar cane bagasse		avrg	17.606
lactic acid	Sugar cane bagasse		yield g/g SCB	0.17606
lactic acid	Sugar cane bagasse
lactic acid	Sugar cane bagasse	ref 5	Lactic acid production from sugarcane bagasse hydrolysates by Lactobacillus pentosus: Integrating xylose and glucose fermentation - Wischral - 2019 - Biotechnology Progress
lactic acid	Sugar cane bagasse		https://aiche.onlinelibrary.wiley.com/doi/full/10.1002/btpr.2718
lactic acid	Sugar cane bagasse
lactic acid	Sugar cane bagasse		the high fermentability of these process herein developed was demonstrated by the total consumption of xylose and glucose by Lactobacillus pentosus, reaching at 65.0 g/L of lactic acid, 0.93 g/g of yield, and 1.01 g/L h of productivity.
lactic acid	Sugar cane bagasse
lactic acid	Sugar cane bagasse		yield g/g xyl +glu	0.93
lactic acid	Sugar cane bagasse		xyl +glu in sugarcane bagasse	77.3193
lactic acid	Sugar cane bagasse		yield g/g SCB	0.719069
lactic acid	Sugar cane bagasse
lactic acid	Sugar cane bagasse		LACTIC ACID		1.34	g LA/g glucose consumed	0.3082		Full article: Swollenin pre-conditioning: optimization studies and application aiming at d-lactic acid production from sugarcane bagasse (wur.nl)	Above theoretical max og 1g/g due to addition of high yeast extract concentration to fermentation medium
lactic acid	Sugar cane bagasse		LACTIC ACID		0.89	g LA/g glucose	0.2047		Lactic acid production from sugarcane bagasse by an integrated system of lignocellulose fractionation, saccharification, fermentation, and ex-situ nanofiltration - ScienceDirect (wur.nl)
lactic acid	Sugar cane bagasse		LACTIC ACID		0.83	w/w on total lignocellulosic sugars	0.354576		Production of l(+)-lactic acid from acid pretreated sugarcane bagasse using Bacillus coagulans DSM2314 in a simultaneous saccharification and fermentation strategy | Biotechnology for Biofuels and Bioproducts | Full Text (biomedcentral.com)
lactic acid	Sugar cane bagasse		LACTIC ACID		0.9	w/w on total monomeric sugars	0.430137		Production of l(+)-lactic acid from acid pretreated sugarcane bagasse using Bacillus coagulans DSM2314 in a simultaneous saccharification and fermentation strategy | Biotechnology for Biofuels and Bioproducts | Full Text (biomedcentral.com)
lactic acid	Sugar cane bagasse		LACTIC ACID		0.66	g LA/g xylose	0.315434		Fermentative valorisation of xylose-rich hemicellulosic hydrolysates from agricultural waste residues for lactic acid production under non-sterile conditions - ScienceDirect (wur.nl)	xylose rich scb
lactic acid	Sugar cane bagasse		LACTIC ACID		0.52	g LA/g dry bagasse	0.52		One-pot bioprocess for lactic acid production from lignocellulosic agro-wastes by using ionic liquid stable Lactobacillus brevis - ScienceDirect (wur.nl)
lactic acid	Sugar cane bagasse		LACTIC ACID		0.88	g LA/g carbohydrate	0.622978		Fermentation | Free Full-Text | Lactic Acid Production from Steam-Exploded Sugarcane Bagasse Using Bacillus coagulans DSM2314 (mdpi.com)
lactic acid	Sugar cane bagasse		LACTIC ACID		0.93	g LA/g C5 sugars	0.444475		Fermentation | Free Full-Text | Lactic Acid Production from Steam-Exploded Sugarcane Bagasse Using Bacillus coagulans DSM2314 (mdpi.com)		detoxified C5 stream
lactic acid	Sugar cane bagasse		LACTIC ACID		0.98	g LA/g sugars	0.468371		Lactic Acid Production from Renewable Feedstocks Using Poly(vinyl alcohol)-Immobilized Lactobacillus plantarum 23 | Industrial & Engineering Chemistry Research (wur.nl)
lactic acid	Sugar cane bagasse		LACTIC ACID		0.83	g LA/g cellulose	0.3984		Lactic acid production from waste sugarcane bagasse derived cellulose - Green Chemistry (RSC Publishing) (wur.nl)
lactic acid	Sugar cane bagasse		LACTIC ACID		76	% theoretical, cellulose			Microbial conversion of agro-wastes for lactic acid production
lactic acid	Sugar cane bagasse		LACTIC ACID		0.33	g LA/g glucan	0.0759		D-Lactic Acid Production from Sugarcane Bagasse by Genetically Engineered Saccharomyces cerevisiae - ProQuest
lactic acid	Sugar cane bagasse		LACTIC ACID		91.79	%theoretical yield sugars	0.438692		Highly selective catalytic conversion of raw sugar and sugarcane bagasse to lactic acid over YbCl3, ErCl3, and CeCl3 Lewis acid catalysts without alkaline in a hot-compressed water reaction system - ScienceDirect (wur.nl)	ErCl3 catalyst
lactic acid	Sugar cane bagasse		LACTIC ACID		0.99	g LA/g total reducing sugars	0.473151		Efficient Open Fermentative Production of Polymer-Grade L-Lactate from Sugarcane Bagasse Hydrolysate by Thermotolerant Bacillus sp. Strain P38 - ProQuest
lactic acid	Sugar cane bagasse
lactic acid	Sugar cane bagasse
lactic acid	Sugar cane bagasse
lactic acid	Sugar cane bagasse
lactic acid	Sugar cane bagasse
lactic acid	Sugar cane bagasse
lactic acid	Sugar cane bagasse
lactic acid	Sugar cane bagasse
lactic acid	Sugar cane bagasse
lactic acid	Sugar cane bagasse
lactic acid	Sugar cane molasses	ref 1	Different Strategies To Improve Lactic Acid Productivity Based on Microorganism Physiology and Optimum Operating Conditions | Industrial & Engineering Chemistry Research
lactic acid	Sugar cane molasses		https://pubs.acs.org/doi/full/10.1021/acs.iecr.8b01655
lactic acid	Sugar cane molasses
lactic acid	Sugar cane molasses		With these strategies and using molasses as a substrate, it was possible to obtain a yield of 95%, with a productivity of 5.38 g L–1 h–1, and a titer of 157.95 g/L of lactic acid.
lactic acid	Sugar cane molasses
lactic acid	Sugar cane molasses
lactic acid	Sugar cane molasses
lactic acid	Sugar cane molasses
lactic acid	Sugar cane molasses
lactic acid	Sugar cane molasses		total sugar after inversion (TSAI)
lactic acid	Sugar cane molasses
lactic acid	Sugar cane molasses		yield g/g	0.95
lactic acid	Sugar cane molasses		tot sugar in sm	55.6474
lactic acid	Sugar cane molasses		yield g/g SM	0.52865
lactic acid	Sugar cane molasses
lactic acid	Sugar cane molasses	ref 2	https://pakbs.org/pjbot/PDFs/44(1)/49.pdf
lactic acid	Sugar cane molasses		OPTIMIZATION OF LACTIC ACID PRODUCTION FROM CHEAP RAW MATERIAL: SUGARCANE MOLASSES
lactic acid	Sugar cane molasses		The maximum recovery of lactic acid with respect to initial total sugar contents of the media (9.91±0.20 g/100 ml) was 78.30%.
lactic acid	Sugar cane molasses		yield g/g tot sugar	0.783
lactic acid	Sugar cane molasses		tot sugar in sm	55.6474
lactic acid	Sugar cane molasses		yield g/g SM	0.435719
lactic acid	Sugar cane molasses
lactic acid	Sugar cane molasses	ref 3	Optimization of lactic acid production by Lactobacillus plantarum strain Hui1 in a medium containing sugarcane molasses - ProQuest
lactic acid	Sugar cane molasses		https://www.redalyc.org/journal/1803/180376043012/html/
lactic acid	Sugar cane molasses
lactic acid	Sugar cane molasses
lactic acid	Sugar cane molasses
lactic acid	Sugar cane molasses
lactic acid	Sugar cane molasses
lactic acid	Sugar cane molasses		Several carbon, nitrogen and ion sources were tested, and the optimum concentration of lactic acid achieved was 84.2 g L-1 in a medium containing as follows (in g L-1): meat extract, 18.69; tryptone, 7.88; sugar cane molasses, 140; calcium carbonate, 15; dipotassium phosphate, 1; manganese phosphate, 0.03; sodium acetate, 5, and magnesium sulphate, 0.2. In addition, a high degree of conversion fr…
lactic acid	Sugar cane molasses
lactic acid	Sugar cane molasses
lactic acid	Sugar cane molasses		yp/s g/g	0.898
lactic acid	Sugar cane molasses		tot sugar in sm	55.6474
lactic acid	Sugar cane molasses		yield g/g SM	0.499713
lactic acid	Sugar cane molasses
lactic acid	Sugar cane molasses	ref 4	https://pubs.acs.org/doi/full/10.1021/acs.jafc.0c00259
lactic acid	Sugar cane molasses		Improvement and Metabolomics-Based Analysis of d-Lactic Acid Production from Agro-Industrial Wastes by Lactobacillus delbrueckii Submitted to Adaptive Laboratory Evolution
lactic acid	Sugar cane molasses		Finally, fed-batch simultaneous enzymatic hydrolysis of soybean meal and fermentation process by evolved strain resulted in d-lactic acid levels of 112.3 g/L, with an average production efficiency of 2.4 g/(L × h), a yield of 0.98 g/g sugar, and optical purity of 99.6%.
lactic acid	Sugar cane molasses
lactic acid	Sugar cane molasses		yield g/g tot sugar	0.98
lactic acid	Sugar cane molasses		tot sugar in sm	55.6474
lactic acid	Sugar cane molasses		yield g/g SM	0.545344
lactic acid	Sugar cane molasses
lactic acid	Sugar cane molasses	ref 5	Efficient production of lactic acid from sugarcane molasses by a newly microbial consortium CEE-DL15 - ScienceDirect (wur.nl)
lactic acid	Sugar cane molasses		https://www.sciencedirect.com/science/article/pii/S1359511318316404
lactic acid	Sugar cane molasses
lactic acid	Sugar cane molasses		In batch fermentations using sugarcane molasses of 350 g/L and corn steep liquor powder of 18.5 g/L without additional nutrients, CEE-DL15 produced 112.34 g/L lactic acid (107.40 g/L L-lactic acid and 4.94 g/L D-lactic acid), with a yield of 0.81 g/g and a maximum productivity of 4.49 g/(L.h), which is the best lactic acid productivity from molasses published so far.
lactic acid	Sugar cane molasses
lactic acid	Sugar cane molasses		yield g/g hexose	0.81
lactic acid	Sugar cane molasses		hexose in SM	55.6474
lactic acid	Sugar cane molasses		yield g/g SM	0.450744
SORBITOL	sugarcane	theoretical	https://link.springer.com/article/10.1007/s00253-002-1046-0
SORBITOL	sugarcane		The biotechnological production of sorbitol
SORBITOL	sugarcane		avrg conversion of glucose and fructose %	95.2
SORBITOL	sugarcane		yield g/g glucose and fructose	0.962578
SORBITOL	sugarcane		glu+ fru in sugarcane %	27.1088
SORBITOL	sugarcane		yield g/g sugarcane	0.260944
SORBITOL	sugarcane bagasse	theoretical	https://link.springer.com/article/10.1007/s00253-002-1046-0
SORBITOL	sugarcane bagasse		The biotechnological production of sorbitol
SORBITOL	sugarcane bagasse		avrg conversion of glucose and fructose %	95.2
SORBITOL	sugarcane bagasse		yield g/g glucose and fructose	0.962578
SORBITOL	sugarcane bagasse		glu+ fru in sugarcane bagasse %	64.8091
SORBITOL	sugarcane bagasse		yield g/g sugarcane bagasse	0.623838
SORBITOL	Sugar cane molasses	ref 1	https://www.sciencedirect.com/science/article/pii/S0032959204000780
SORBITOL	Sugar cane molasses		Optimization study for sorbitol production by Zymomonas mobilis in sugar cane molasses
SORBITOL	Sugar cane molasses		Table 3. Experimental design 22 and planning in star design for investigating the effect of TRS and time of growth (runs 1–7) and TRS and temperature (runs 8–11)
SORBITOL	Sugar cane molasses		Run	Coded levels		Real levels			Measured response
SORBITOL	Sugar cane molasses		Empty Cell	X1	X2	TRSa initial (g/l)	Time (h)	Sorbitol (g/l)	Consumption of TRS (g/l)	Ypr (%)	Yp/s (g/g)	Yp (g/(l h))
SORBITOL	Sugar cane molasses		1	−1	−1	250	24	5.08	26.43	38.53	0.2	0.21
SORBITOL	Sugar cane molasses		2	1	−1	350	24	4.85	29.11	32.62	0.17	0.2
SORBITOL	Sugar cane molasses		3	−1	1	250	48	3.29	115.25	5.36	0.03	0.07
SORBITOL	Sugar cane molasses		4	1	1	350	48	8.11	134.36	11.32	0.06	0.17
SORBITOL	Sugar cane molasses		5	0	0	300	36	11.64	160.26	13.64	0.07	0.32
SORBITOL	Sugar cane molasses		6	0	0	300	36	11.84	117	18.99	0.1	0.33
SORBITOL	Sugar cane molasses		7	0	0	300	36	13.87	113.37	22.96	0.12	0.38
SORBITOL	Sugar cane molasses					TRSa (g/l)	Temperature (°C)
SORBITOL	Sugar cane molasses		8	−1.141	0	230	36	2.58	ndb	nd	nd	nd
SORBITOL	Sugar cane molasses		9	0	1.141	300	53	0	nd	nd	nd	nd
SORBITOL	Sugar cane molasses		10	1.141	0	370	36	4.91	nd	nd	nd	nd
SORBITOL	Sugar cane molasses		11	0	−1.141	300	19	1.58	nd	nd	nd	nd
SORBITOL	Sugar cane molasses		a
SORBITOL	Sugar cane molasses		TRS: total reducing sugar.
SORBITOL	Sugar cane molasses		b
SORBITOL	Sugar cane molasses		nd: not determined.
SORBITOL	Sugar cane molasses
SORBITOL	Sugar cane molasses
SORBITOL	Sugar cane molasses		yield avrg	0.107143
SORBITOL	Sugar cane molasses		sugar in Sugar cane molasses	55.6474
SORBITOL	Sugar cane molasses		yield g/g sugarcane molasses	0.0596222
xylitol	sugarcane	ref 1	Characteristics of adapted and non-adapted Candida tropicalis InaCC Y799 during fermentation of detoxified and undetoxified hemicellulosic hydrolysate from sugarcane trash for xylitol production
xylitol	sugarcane		https://link.springer.com/article/10.1007/s13399-021-02087-4
xylitol	sugarcane
xylitol	sugarcane
xylitol	sugarcane		The yeast adaptation in 75% hydrolysates and detoxification of fermentation medium produced higher xylitol yields (0.54–0.56 g xylitol/g initial xylose; 53.72–54.98% theoretical yield),
xylitol	sugarcane		in a shorter time (24 h) than did the adapted yeast to 50% hydrolysate and non-adapted yeast grown in non-detoxified medium (0.51–0.57 g xylitol/g initial xylose
xylitol	sugarcane
xylitol	sugarcane
xylitol	sugarcane		g xylitol/g initial xylose	0.54
xylitol	sugarcane			0.56
xylitol	sugarcane			0.51
xylitol	sugarcane			0.57
xylitol	sugarcane		avrg	0.545
xylitol	sugarcane		xylose in sugarcane	3.73335
xylitol	sugarcane		yield g/g sugarcane	0.0203468
xylitol	sugarcane
xylitol	sugarcane
xylitol	sugarcane	ref 2	Biochemical conversion of sugarcane straw hemicellulosic hydrolyzate supplemented with co-substrates for xylitol production
xylitol	sugarcane		https://www.sciencedirect.com/science/article/pii/S096085241501562X
xylitol	sugarcane
xylitol	sugarcane		Fermentation efficiency was calculated as the ratio between experimental and theoretical xylitol yield, which corresponds to 0.917 gg−1 according to Barbosa et al. (1988).
xylitol	sugarcane
xylitol	sugarcane		able 1. Effect of co-substrate supplementation to sugarcane straw hemicellulosic hydrolyzate on xylose consumption and xylitol production by C. guilliermondii FTI 20037.
xylitol	sugarcane		Co-substrate (g L−1)		Xylose uptake rate (g L−1 h−1)a	Final xylitol concentration (g L−1)	Xylitol volumetric productivity (g L−1 h−1)b	Fermentation efficiency (%)c
xylitol	sugarcane		Control	–	1.02 ± 0.02	31.99 ± 0.21	0.67 ± 0.00	70.03 ± 1.03	70.03
xylitol	sugarcane
xylitol	sugarcane		Maltose	5	0.96 ± 0.03	29.35 ± 0.71	0.61 ± 0.01	68.66 ± 1.19	68.66
xylitol	sugarcane			10	0.91 ± 0.02	28.26 ± 1.20	0.59 ± 0.03	70.03 ± 4.49	70.03
xylitol	sugarcane			15	0.93 ± 0.01	26.06 ± 0.64	0.54 ± 0.01	63.51 ± 1.57	63.51
xylitol	sugarcane
xylitol	sugarcane		Sucrose	5	1.07 ± 0.02	32.73 ± 1.89	0.68 ± 0.04	63.17 ± 3.15	63.17
xylitol	sugarcane			10	1.11 ± 0.02	36.11 ± 0.83	0.75 ± 0.02	70.37 ± 2.59	70.37
xylitol	sugarcane			15	1.05 ± 0.02	32.64 ± 0.48	0.68 ± 0.01	66.94 ± 1.46	66.94
xylitol	sugarcane
xylitol	sugarcane		Cellobiose	5	0.95 ± 0.03	29.35 ± 0.62	0.61 ± 0.01	68.66 ± 3.15	68.66
xylitol	sugarcane			10	0.96 ± 0.01	30.16 ± 0.78	0.63 ± 0.02	67.28 ± 3.31	67.28
xylitol	sugarcane			15	0.95 ± 0.03	31.79 ± 1.32	0.66 ± 0.03	75.52 ± 2.14	75.52
xylitol	sugarcane
xylitol	sugarcane		Glycerol	0.7	1.09 ± 0.02	31.82 ± 0.82	0.66 ± 0.02	66.25 ± 2.97	66.25
xylitol	sugarcane			1	0.98 ± 0.03	31.76 ± 0.82	0.66 ± 0.02	72.09 ± 3.09	72.09
xylitol	sugarcane			1.5	1.08 ± 0.02	33.25 ± 2.05	0.69 ± 0.04	70.72 ± 6.21	70.72
xylitol	sugarcane								68.71
xylitol	sugarcane							min	63.17
xylitol	sugarcane							max	75.52
xylitol	sugarcane
xylitol	sugarcane		theoretical xylitol yield gg−1	0.917
xylitol	sugarcane		yield	0.630071
xylitol	sugarcane		xylose in sugarcane	3.73335
xylitol	sugarcane		yield g/g sugarcane	0.0235228
xylitol	sugarcane
xylitol	sugarcane	ref 3	Rational engineering of industrial S. cerevisiae: towards xylitol production from sugarcane straw | Journal of Genetic Engineering and Biotechnology
xylitol	sugarcane		https://link.springer.com/article/10.1186/s43141-022-00359-8
xylitol	sugarcane
xylitol	sugarcane
xylitol	sugarcane		Table 2 Xylitol productivity of strains FMYX and CENPKX in YPDX under varying cultivation conditions
xylitol	sugarcane		From: Rational engineering of industrial S. cerevisiae: towards xylitol production from sugarcane straw
xylitol	sugarcane		Experiment	Strain	Varying condition	Xylitol
xylitol	sugarcane					Titre (g/L)	Yield (g/g)	Productivity (g/L.h)	Yield (g/g)
xylitol	sugarcane		Co-substrate ratio	FMYX	10 g/L glucose	13.06 ± 1.03a	0.78 ± 0.06a	0.13 ± 0.01a	0.78
xylitol	sugarcane				20 g/L glucose	15.60 ± 3.71a	0.80 ± 0.20a	0.15 ± 0.04a	0.8
xylitol	sugarcane		Fixed 20 g/L xylose; initial OD 0.5 and full aeration		30 g/L glucose	15.74 ± 0.36a*	0.91 ± 0.02a*	0.15 ± 0.00a*	0.91
xylitol	sugarcane			CENPKX	10 g/L glucose	14.29 ± 0.89ab	0.83 ± 0.06a	0.14 ± 0.01ab	0.83
xylitol	sugarcane				20 g/L glucose	14.54 ± 0.09a	0.74 ± 0.00ab	0.14 ± 0.00a	0.74
xylitol	sugarcane				30 g/L glucose	12.84 ± 0.27b	0.69 ± 0.02b	0.12 ± 0.00b	0.69
xylitol	sugarcane		Aeration	FMYX	Aerobic	15.74 ± 0.36a*	0.91 ± 0.02a*	0.15 ± 0.00a*	0.91
xylitol	sugarcane				Semi-anaerobic	10.75 ± 1.51b	0.71 ± 0.04b	0.10 ± 0.01b	0.71
xylitol	sugarcane		Fixed 20 g/L xylose; 30 g/L glucose and initial OD 0.5	CENPKX	Aerobic	12.84 ± 0.27a	0.69 ± 0.02a	0.12 ± 0.00a	0.69
xylitol	sugarcane				Semi-anaerobic	9.92 ± 0.39b	0.78 ± 0.05a	0.10 ± 0.00b	0.78
xylitol	sugarcane		Inoculum concentration	FMYX	OD 0.5	15.74 ± 0.36b*	0.91 ± 0.02a*	0.15 ± 0.00b*	0.91
xylitol	sugarcane				OD 1.0	16.97 ± 0.10a*	0.93 ± 0.02a*	0.16 ± 0.00a*	0.93
xylitol	sugarcane		Fixed 20 g/L xylose; 30 g/L glucose and full aeration	CENPKX	OD 0.5	12.84 ± 0.27b	0.69 ± 0.02b	0.12 ± 0.00b	0.69
xylitol	sugarcane				OD 1.0	15.38 ± 0.24a	0.83 ± 0.01a	0.15 ± 0.00a	0.83
xylitol	sugarcane		Letters (a, b, c) represent statistical differences (Tukey test) observed in different cultivation conditions within the same experiment and strain. Asterisk (*) represents statistical difference (Tukey test) observed between strains within the same experiment condition
xylitol	sugarcane							avrg	0.8
xylitol	sugarcane							min	0.69
xylitol	sugarcane		Yield g/g	0.8				max	0.78
xylitol	sugarcane		xylose in sugarcane	3.73335
xylitol	sugarcane		yield g/g sugarcane	0.0298668
xylitol	sugarcane
xylitol	sugarcane	ref 4	Sugarcane straw as a feedstock for xylitol production by Candida guilliermondii FTI 20037
xylitol	sugarcane		https://www.scielo.br/j/bjm/a/GzLCVkXzjv7yBpQtQQxLqNS/?lang=en
xylitol	sugarcane		In this condition the maximum xylitol yield (0.67 g g-1) was obtained under reduced initial oxygen availability
xylitol	sugarcane
xylitol	sugarcane		Yield g/g	0.67
xylitol	sugarcane		xylose in sugarcane	3.73335
xylitol	sugarcane		yield g/g sugarcane	0.0250135
xylitol	sugarcane
xylitol	sugarcane	ref 5	Influence of Different Pretreatment Methods and Yeast Strains on Xylitol Production from Sugarcane Trash Hemicellulose Hydrolysate
xylitol	sugarcane		https://link.springer.com/chapter/10.1007/978-981-19-0308-3_45
xylitol	sugarcane
xylitol	sugarcane		Xylitol yield (Yp/s) was calculated as the ratio between xylitol concentration and consumed xylose concentration
xylitol	sugarcane
xylitol	sugarcane		the yield ranged from 0.06 to 0.15 g xylitol/g xylose consumed
xylitol	sugarcane		K. marxianus TBRC 1524 produced the highest xylitol concentration (2.3 g/L) with volumetric productivity of 0.096 g/L/h, yielding 0.15 g xylitol/g xylose consumed
xylitol	sugarcane
xylitol	sugarcane		yield	0.06
xylitol	sugarcane			0.15
xylitol	sugarcane			0.096
xylitol	sugarcane			0.15
xylitol	sugarcane		avrg	0.114
xylitol	sugarcane		xylose in sugarcane	3.73335
xylitol	sugarcane		yield g/g sugarcane	0.00425602
xylitol	sugarcane bagasse
xylitol	sugarcane bagasse	ref 1	Response surface methodology for xylitol production from sugarcane bagasse hemicellulosic hydrolyzate using controlled vacuum evaporation process variables
xylitol	sugarcane bagasse		https://www.sciencedirect.com/science/article/pii/S003295920200290X
xylitol	sugarcane bagasse
xylitol	sugarcane bagasse		nder these conditions, the xylose, acetic acid and arabinose consumption levels were 93, 57 and 13.62%, respectively, and xylitol yield and production were 0.54 g/g and 24.33 g/l, respectively.
xylitol	sugarcane bagasse
xylitol	sugarcane bagasse		yield g/g	0.54
xylitol	sugarcane bagasse		xylose in sugarcane bagasse	12.5101
xylitol	sugarcane bagasse		yield g/g sugarcane bagasse	0.0675548
xylitol	sugarcane bagasse
xylitol	sugarcane bagasse	ref 2	Integrated lignocellulosic bioprocess for co-production of ethanol and xylitol from sugarcane bagasse
xylitol	sugarcane bagasse		https://www.sciencedirect.com/science/article/pii/S0926669018305806
xylitol	sugarcane bagasse
xylitol	sugarcane bagasse		Of the total glucose and xylose available in bagasse, the product yield of 0.44 g/g (ethanol) and 0.50 g/g (xylitol) were reached.
xylitol	sugarcane bagasse
xylitol	sugarcane bagasse		yield g/g	0.5
xylitol	sugarcane bagasse		xylose in sugarcane bagasse	12.5101
xylitol	sugarcane bagasse		yield g/g sugarcane bagasse	0.0625507
xylitol	sugarcane bagasse
xylitol	sugarcane bagasse	ref 3	https://www.sciencedirect.com/science/article/pii/S0032959202002443
xylitol	sugarcane bagasse		The influence of pH and dilution rate on continuous production of xylitol from sugarcane bagasse hemicellulosic hydrolysate by C. guilliermondii
xylitol	sugarcane bagasse
xylitol	sugarcane bagasse		Table 2. Effect of the pH, kLa and D on xylitol and cell yield factors, xylitol volumetric productivity and fermentation efficiency obtained by continuous fermentation of sugarcane bagasse hemicellulosic hydrolysate by C. guilliermondii
xylitol	sugarcane bagasse		Factors				Fermentative parameters
xylitol	sugarcane bagasse		pH	kLa (1/h)	D (1/h)	Yp/s (g/g)	Yx/s (g/g)	Qp (g/l h)	ε (%)
xylitol	sugarcane bagasse		4	10	0.01	0.24	0.11	0.1	26.5
xylitol	sugarcane bagasse				0.05	0.46	0.28	0.2	50
xylitol	sugarcane bagasse
xylitol	sugarcane bagasse			30	0.01	0.63	0.39	0.29	68.7
xylitol	sugarcane bagasse				0.05	0.4	0.14	0.27	43.1
xylitol	sugarcane bagasse
xylitol	sugarcane bagasse		7	10	0.01	0.32	0.15	0.17	34.7
xylitol	sugarcane bagasse				0.05	0.58	0.19	0.57	63.7
xylitol	sugarcane bagasse
xylitol	sugarcane bagasse			30	0.01	0.1	0.54	0.05	11.1
xylitol	sugarcane bagasse				0.05	0.48	0.34	0.56	54
xylitol	sugarcane bagasse		Yp/s, xylitol yield factor; Yx/s, cell yield factor; Qp, xylitol volumetric productivity; ε, fermentation efficiency.
xylitol	sugarcane bagasse
xylitol	sugarcane bagasse		avrg yield	0.40125
xylitol	sugarcane bagasse		xylose in sugarcane bagasse	12.5101
xylitol	sugarcane bagasse		yield g/g sugarcane bagasse	0.050197
xylitol	sugarcane bagasse
xylitol	sugarcane bagasse	ref 4	https://link.springer.com/chapter/10.1007/978-3-642-31887-0_7
xylitol	sugarcane bagasse		Fermentation Strategies Explored for Xylitol Production
xylitol	sugarcane bagasse	1	Cunha et al. (2006), using C. guilliermondii cells immobilized in 5 g of PVA-hydrogel to ferment 45 mL of sugarcane bagasse hemicellulosic hydrolyzate in 125-mL Erlenmeyer flasks, observed that the biocatalyst remained stable and exhibited a similar fermentative profile in five repeated-batch fermentations and obtained as an average P = 35.1 g/L, Q P = 0.49 g/L h and Y P/S = 0.58 g/g.
xylitol	sugarcane bagasse		Y P/S g/g	0.58
xylitol	sugarcane bagasse		xylose in sugarcane bagasse	12.5101
xylitol	sugarcane bagasse		yield g/g sugarcane bagasse	0.0725588
xylitol	sugarcane bagasse
xylitol	sugarcane bagasse	2	A maximum volumetric productivity (Q P) of 0.60 g/L h and a product yield (Y P/S) of 0.66 g/g were achieved at a dilution rate (D) of 0.048 h−1, leaving 11 g/L of xylose in the fermented broth.
xylitol	sugarcane bagasse		Y P/S g/g	0.66
xylitol	sugarcane bagasse		xylose in sugarcane bagasse	12.5101
xylitol	sugarcane bagasse		yield g/g sugarcane bagasse	0.082567
xylitol	Sugarcane molasses	theoretical	https://www.sciencedirect.com/science/article/pii/S0922338X98800263?casa_token=aLqBeV90biIAAAAA:uqYoRDUYXPdbjyYra-122gWl9FVoabLSx-h_EHf6fDpWVOsKLf0qIS6Sd5kzioR63hHTDi8
xylitol	Sugarcane molasses		Microbial conversion of d-xylose to xylitol
xylitol	Sugarcane molasses		avrg Yx/s (g xylitol/g xylose)	0.485909
xylitol	Sugarcane molasses		xylose in sugarcane molasses	0
xylitol	Sugarcane molasses		yield g/g sugarcane molasses	0

[truncated: 3 more sheets: Sugar Beet, rapeseed, barley]
