# Supplementary material
Source: Research Square preprint supplement (doi:10.21203/rs.3.rs-9225422/v1)
Supplement: Supplementary file 4 [file e5159f3819f6641dcbeb51e1.xlsx]

## Sheet: String
colour code	>5 papers are relevant	1-4 papers are relevant	0 paper is relevant
	The search string applied in this study
	Side Stream	corn	corn germ	corn pericarp	Wheat grain	Wheat Bran	Wheat Germ	Whole Potato	Whole Tomato	Tomato Pomace	sugarcane	sugarcane bagasse	Molasses	Filter cake	Whole Beets	Beet pulp	Molasses	Rice grain	Rice hull	Rice bran	Apple	apple pomace	orange	orange peel	banana	banana peel	potato pulp	sweet potato	sweet potato pulp	barley	Waste from malt production	spent grainsfrom beer	Rapeseed	Rapeseed meal
	Platform Chemical	Ethanol	Ethanol	Ethanol	Ethanol	Ethanol	Ethanol	Ethanol	Ethanol	Ethanol	Ethanol	Ethanol	Ethanol	Ethanol	Ethanol	Ethanol	Ethanol	Ethanol	Ethanol	Ethanol	Ethanol	Ethanol	Ethanol	Ethanol	Ethanol	Ethanol	Ethanol	Ethanol	Ethanol	Ethanol	Ethanol	Ethanol	Ethanol	Ethanol
	Search Query	("whole corn" OR "corn" OR "maize" OR "whole maize") AND ("ethanol production")	("corn germ" OR "maize germ") AND ("ethanol production")	("corn pericarp" OR "maize pericarp") AND ("ethanol production")	("wheat" OR "whole wheat") AND ("ethanol production") AND NOT ( "straw" )	("bran of wheat" OR "wheat bran") AND ("ethanol production")	("wheat germ") AND ("ethanol production")	( "potato") AND ( "ethanol production" ) AND NOT ( "sweet potato" OR "peel" OR "pulp" )	("tomato" OR "whole tomato") AND ("ethanol production")	("tomato pomace" OR "tomato seeds" OR "tomato skin") AND ("ethanol production")	("sugarcane" OR "sugar cane" OR "whole sugarcane" OR "whole sugar cane") AND ("ethanol production")	("bagasse") AND ("ethanol production")	("sugar cane molasses" OR "sugarcane molasses") AND ("ethanol production")	( "filtercake" OR "filter cake" ) AND ( "sugarcane" ) AND ( "ethanol production" )	( "beet" OR "sugar beet" OR "sugar beet" OR "whole beet" OR "beetroot" OR "sugar beetroot" ) AND ( "ethanol production" ) AND NOT ( "pulp" OR " molasses" )	("beet pulp") AND ("ethanol production")	("sugar beet molasses" OR "beet molasses") AND ("ethanol production")	( ( "rice" ) AND ( "ethanol produc*" ) ) AND NOT ( "hull" OR "husk" OR "bran" OR "straw" )	("rice hull") AND ("ethanol production")	("rice bran") AND ("ethanol production")	( ( "apple" ) AND ( "ethanol production" ) ) AND NOT ( "pomace" OR "peel" )	("apple pomace") AND ("ethanol production")	("orange" OR "citrus" OR "mandarin") AND ("ethanol production")AND NOT ( "peel" )	("orange peel" OR "citrus peel" OR "mandarin peel") AND ("ethanol production")	( "banana" ) AND ( "ethanol production" ) AND NOT ( "peel" OR "stem" OR "leaf" )	("banana peel") AND ("ethanol production")	("potato pulp") AND ("ethanol production")	("sweet potato") AND ("ethanol production")	("sweet potato pulp") AND ("ethanol production")	("barley") AND ("ethanol production")	( "malt* rootlets" OR "malt* germ" OR "malt* waste" ) AND "ethanol production"	("spent grains" AND "ethanol production"	( "rapeseed" ) AND ( "ethanol production" ) AND NOT ( "biodiesel" OR "straw" OR "stalks" OR "rapeseed oil" )	("rapeseed meal" OR "rapeseed cake" OR "rapeseed filter" OR "canola meal") AND ("ethanol production")
	Research Portal	Scopus	Scopus	Scopus	Scopus	Scopus	Scopus	Scopus	Scopus	Scopus	Scopus	Scopus	Scopus	Scopus	Scopus	Scopus	Scopus	Scopus	Scopus	Scopus	Scopus	Scopus	Scopus	Scopus	Scopus	Scopus	Scopus	Scopus	Scopus	Scopus	Scopus	Scopus	Scopus	Scopus
	Hits	2350	11	1	383	82	1	95	12	1	2212	1121	132	22	160	37	46	177	25	30	74	17	54	35	59	32	4	94	0	171	0	40	8	9
	Platform Chemical	Furfural	Furfural	Furfural	Furfural	Furfural	Furfural	Furfural	Furfural	Furfural	Furfural	Furfural	Furfural	Furfural	Furfural	Furfural	Furfural	Furfural	Furfural	Furfural	Furfural	Furfural	Furfural	Furfural	Furfural	Furfural	Furfural	Furfural	Furfural	Furfural	Furfural	Furfural	Furfural	Furfural
	Search Query	("whole corn" OR "corn" OR "maize" OR "whole maize") AND ("furfural production")	("corn germ" OR "maize germ") AND ("furfural production")	("corn pericarp" OR "maize pericarp") AND ("furfural production")	("wheat" OR "whole wheat") AND ("furfural production")AND NOT ( "straw" )	("bran" OR "bran of wheat" OR "wheat bran") AND ("furfural production")	("germ" OR "germ of wheat" OR "wheat germ") AND ("furfural production")	("potato") AND ("furfural production")	("tomato" OR "whole tomato") AND ("furfural production")	("tomato pomace" OR "tomato seeds" OR "tomato skin") AND ("furfural production")	( "sugarcane" OR "sugar cane" OR "whole sugarcane" OR "whole sugar cane" ) AND ( "furfural production" ) AND NOT ( "bagasse" )	("bagasse") AND ("furfural production")	("sugar cane molasses" OR "sugarcane molasses") AND ("furfural production")	("filtercake" OR "filter cake") AND ("furfural production")	("beet" OR "sugar beet" OR "sugar beet" OR "whole beet" OR "beetroot" OR "sugar beetroot") AND ("furfural production") AND NOT("pulp")	("beet pulp") AND ("furfural production")	("sugar beet molasses" OR "beet molasses") AND ("furfural production")	("rice") AND ("furfural production")AND NOT ( "hull" OR "husk" OR "bran" OR "straw" )	( "rice hull" OR "rice husk" ) AND ( "furfural production" ))	("rice bran") AND ("furfural production")	("apple") AND ("furfural production")AND NOT ( "pomace" OR "peel" )	("apple pomace") AND ("furfural production")	("orange" OR "citrus" OR "mandarin") AND ("furfural production")AND NOT ( "peel" )	("orange peel" OR "citrus peel" OR "mandarin peel") AND ("furfural production")	("banana") AND ("furfural production")	("banana peel") AND ("furfural production")	("potato pulp") AND ("furfural production")	("sweet potato pulp") AND ("furfural production")	("sweet potato") AND ("furfural production")	( "barley" ) AND ( "furfural production" )	( "malt* rootlets" OR "malt* germ" OR "malt* waste" ) AND "furfural production"	( "spent grains" AND "furfural production" )	("rapeseed") AND ("furfural production") AND NOT ( "straw" OR "stalks" OR "rapeseed oil" )	( "rapeseed meal" OR "rapeseed cake" OR "rapeseed filter" OR "canola meal" ) AND ( "furfural production" )
	Research Portal	Scopus	Scopus	Scopus	Scopus	Scopus	Scopus	Scopus	Scopus	Scopus	Scopus	Scopus	Scopus	Scopus	Scopus	Scopus	Scopus	Scopus	Scopus	Scopus	Scopus	Scopus	Scopus	Scopus	Scopus	Scopus	Scopus	Scopus	Scopus	Scopus	Scopus	Scopus	Scopus	Scopus
	Hits	65	0	0	2	2	0	1	0	0	3	42	0	0	0	2	0	0	14	0	0	0	1	1	1	0	0	0	0	0	0	0	0	0
	Platform Chemical	HMF	HMF	HMF	HMF	HMF	HMF	HMF	HMF	HMF	HMF	HMF	HMF	HMF	HMF	HMF	HMF	HMF	HMF	HMF	HMF	HMF	HMF	HMF	HMF	HMF	HMF	HMF	HMF	HMF	HMF	HMF	HMF	HMF
	Search Query	("whole corn" OR "corn" OR "maize" OR "whole maize") AND ("HMF production" OR "Hydroxymethylfurfural production")	("corn germ" OR "maize germ") AND ("HMF production" OR "Hydroxymethylfurfural production")	("corn pericarp" OR "maize pericarp") AND ("HMF production" OR "Hydroxymethylfurfural production")	("wheat" OR "whole wheat") AND ("HMF production" OR "Hydroxymethylfurfural production")AND NOT ( "straw" )	("bran" OR "bran of wheat" OR "wheat bran") AND ("HMF production" OR "Hydroxymethylfurfural production")	("germ" OR "germ of wheat" OR "wheat germ") AND ("HMF production" OR "Hydroxymethylfurfural production")	("potato" OR "whole potato") AND ("HMF production" OR "Hydroxymethylfurfural production")	("tomato" OR "whole tomato") AND ("HMF production" OR "Hydroxymethylfurfural production")	("tomato pomace" OR "tomato seeds" OR "tomato skin") AND ("HMF production" OR "Hydroxymethylfurfural production")	("sugarcane" OR "sugar cane" OR "whole sugarcane" OR "whole sugar cane") AND ("HMF production" OR "Hydroxymethylfurfural production")AND NOT ( "bagasse" )	("bagasse") AND ("HMF production" OR "Hydroxymethylfurfural production")	("sugar cane molasses" OR "sugarcane molasses") AND ("HMF production" OR "Hydroxymethylfurfural production")	("filtercake" OR "filter cake") AND ("HMF production" OR "Hydroxymethylfurfural production")	("beet" OR "sugar beet" OR "sugar beet" OR "whole beet" OR "beetroot" OR "sugar beetroot") AND ("HMF production" OR "Hydroxymethylfurfural production")	("beet pulp") AND ("HMF production" OR "Hydroxymethylfurfural production")	("sugar beet molasses" OR "beet molasses") AND ("HMF production" OR "Hydroxymethylfurfural production")	("rice") AND ("HMF production" OR "Hydroxymethylfurfural production")	("rice hull"OR "rice husk")) AND ("HMF production" OR "Hydroxymethylfurfural production")	("rice bran") AND ("HMF production" OR "Hydroxymethylfurfural production")	("apple") AND ("HMF production" OR "Hydroxymethylfurfural production") AND NOT ( "pomace" OR "peel" )	("apple pomace") AND ("HMF production" OR "Hydroxymethylfurfural production")	("orange" OR "citrus" OR "mandarin") AND ("HMF production" OR "Hydroxymethylfurfural production")	("orange peel" OR "citrus peel" OR "mandarin peel") AND ("HMF production" OR "Hydroxymethylfurfural production")	("banana") AND ("HMF production" OR "Hydroxymethylfurfural production")AND NOT ( "peel")	("banana peel") AND ("HMF production" OR "Hydroxymethylfurfural production")	("potato pulp") AND("HMF production" OR "Hydroxymethylfurfural production")	("sweet potato pulp") AND ("HMF production" OR "Hydroxymethylfurfural production")	("sweet potato") AND ("HMF production" OR "Hydroxymethylfurfural production")	barley AND "HMF production"	( "malt* rootlets" OR "malt* germ" OR "malt* waste" ) AND "furfural production"	"spent grains" AND " HMF production"	("rapeseed") AND( "HMF production" OR "Hydroxymethylfurfural production" ) AND NOT ( "straw" OR "stalks" OR "rapeseed oil" )	( "rapeseed meal" OR "rapeseed cake" OR "rapeseed filter" OR "canola meal" ) AND ( "HMF production" OR "Hydroxymethylfurfural production" )
	Research Portal	Scopus	Scopus	Scopus	Scopus	Scopus	Scopus	Scopus	Scopus	Scopus	Scopus	Scopus	Scopus	Scopus	Scopus	Scopus	Scopus	Scopus	Scopus	Scopus	Scopus	Scopus	Scopus	Scopus	Scopus	Scopus	Scopus	Scopus	Scopus	Scopus	Scopus	Scopus	Scopus
	Hits	12	0	0	2	2	0	1	0	0	3	9	1	0	2	0	1	11	3	0	0	1	2	0	2	3	0	0	0	0	0	1	0	0
	Platform Chemical	FDCA	FDCA	FDCA	FDCA	FDCA	FDCA	FDCA	FDCA	FDCA	FDCA	FDCA	FDCA	FDCA	FDCA	FDCA	FDCA	FDCA	FDCA	FDCA	FDCA	FDCA	FDCA	FDCA	FDCA	FDCA	FDCA	FDCA	FDCA	FDCA	FDCA	FDCA	FDCA	FDCA
	Search Query	("whole corn" OR "corn" OR "maize" OR "whole maize") AND ("FDCA production" OR "2,5-Furandicarboxylic acid production")	("corn germ" OR "maize germ") AND ("FDCA production" OR "2,5-Furandicarboxylic acid production")	("corn pericarp" OR "maize pericarp") AND ("FDCA production" OR "2,5-Furandicarboxylic acid production")	("wheat" OR "whole wheat") AND ("FDCA production" OR "2,5-Furandicarboxylic acid production")	("bran" OR "bran of wheat" OR "wheat bran") AND ("FDCA production" OR "2,5-Furandicarboxylic acid production")	("germ" OR "germ of wheat" OR "wheat germ") AND ("FDCA production" OR "2,5-Furandicarboxylic acid production")	("potato" OR "whole potato") AND ("FDCA production" OR "2,5-Furandicarboxylic acid production")	("tomato" OR "whole tomato") AND ("FDCA production" OR "2,5-Furandicarboxylic acid production")	("tomato pomace" OR "tomato seeds" OR "tomato skin") AND ("FDCA production" OR "2,5-Furandicarboxylic acid production")	("sugarcane" OR "sugar cane" OR "whole sugarcane" OR "whole sugar cane") AND ("FDCA production" OR "2,5-Furandicarboxylic acid production")	("bagasse") AND ("FDCA production" OR "2,5-Furandicarboxylic acid production")	("sugar cane molasses" OR "sugarcane molasses") AND ("FDCA production" OR "2,5-Furandicarboxylic acid production")	("filtercake" OR "filter cake") AND ("FDCA production" OR "2,5-Furandicarboxylic acid production")	("beet" OR "sugar beet" OR "sugar beet" OR "whole beet" OR "beetroot" OR "sugar beetroot") AND ("FDCA production" OR "2,5-Furandicarboxylic acid production")	("beet pulp") AND ("FDCA production" OR "2,5-Furandicarboxylic acid production")	("sugar beet molasses" OR "beet molasses") AND ("FDCA production" OR "2,5-Furandicarboxylic acid production")	( "rice" ) AND ( "Furandicarboxylic acid " )	("rice hull" OR "rice husk") AND ( "Furandicarboxylic acid production" )	("rice bran") AND ("FDCA production" OR "2,5-Furandicarboxylic acid production")	("apple") AND ("FDCA production" OR "2,5-Furandicarboxylic acid production")	("apple pomace") AND("FDCA production" OR "2,5-Furandicarboxylic acid production")	("orange" OR "citrus" OR "mandarin") AND ("FDCA production" OR "2,5-Furandicarboxylic acid production")	("orange peel" OR "citrus peel" OR "mandarin peel") AND ("FDCA production" OR "2,5-Furandicarboxylic acid production")	("banana") AND ("FDCA production" OR "2,5-Furandicarboxylic acid production")	("banana peel") AND ("FDCA production" OR "2,5-Furandicarboxylic acid production")	("potato pulp") AND ("FDCA production" OR "2,5-Furandicarboxylic acid production")	("sweet potato pulp") AND ("FDCA production" OR "2,5-Furandicarboxylic acid production")	("sweet potato") AND ("FDCA production" OR "2,5-Furandicarboxylic acid production")	barley AND "FDCA"	( "malt* rootlets" OR "malt* germ" OR "malt* waste" ) AND "FDCA"	"spent grains" AND "FDCA"	("rapeseed") AND ( "FDCA production" OR "2,5-Furandicarboxylic acid production" ) AND NOT ( "straw" OR "stalks" OR "rapeseed oil" )	( "rapeseed meal" OR "rapeseed cake" OR "rapeseed filter" OR "canola meal" ) AND ( "FDCA production" OR "2,5-Furandicarboxylic acid production" )
	Research Portal	Scopus	Scopus	Scopus	Scopus	Scopus	Scopus	Scopus	Scopus	Scopus	Scopus	Scopus	Scopus	Scopus	Scopus	Scopus	Scopus	Scopus	Scopus	Scopus	Scopus	Scopus	Scopus	Scopus	Scopus	Scopus	Scopus	Scopus	Scopus	Scopus	Scopus	Scopus	Scopus	Scopus
	Hits	0	0	0	0	0	0	0	0	0	0	0	0	0	1	0	0	2	0	0	0	0	0	0	0	0	1	0	0	0	0	0	0	0
	Platform Chemical	Isoprene	Isoprene	Isoprene	Isoprene	Isoprene	Isoprene	Isoprene	Isoprene	Isoprene	Isoprene	Isoprene	Isoprene	Isoprene	Isoprene	Isoprene	Isoprene	Isoprene	Isoprene	Isoprene	Isoprene	Isoprene	Isoprene	Isoprene	Isoprene	Isoprene	Isoprene	Isoprene	Isoprene	Isoprene	Isoprene	Isoprene	Isoprene	Isoprene
	Search Query	("whole corn" OR "corn" OR "maize" OR "whole maize") AND ("isoprene production")	("corn germ" OR "maize germ") AND ("isoprene production")	("corn pericarp" OR "maize pericarp")AND ("isoprene production")	("wheat" OR "whole wheat") AND ("isoprene production")	("bran" OR "bran of wheat" OR "wheat bran") AND ("isoprene production")	("germ" OR "germ of wheat" OR "wheat germ") AND ("isoprene production")	("potato" OR "whole potato") AND ("isoprene production")	("tomato" OR "whole tomato") AND ("isoprene production")	("tomato pomace" OR "tomato seeds" OR "tomato skin") AND ("isoprene production")	("sugarcane" OR "sugar cane" OR "whole sugarcane" OR "whole sugar cane") AND ("isoprene production")	("bagasse") AND ("isoprene production")	("sugar cane molasses" OR "sugarcane molasses") AND ("isoprene production")	("filtercake" OR "filter cake") AND ("isoprene production")	("beet" OR "sugar beet" OR "sugar beet" OR "whole beet" OR "beetroot" OR "sugar beetroot") AND ("isoprene production")	("beet pulp") AND ("isoprene production")	("sugar beet molasses" OR "beet molasses") AND ("isoprene production")	("rice") AND ("isoprene production")	("rice hull" OR "rice husk") AND ("isoprene production")	("rice bran") AND ("isoprene production")	("apple") AND ("isoprene production")	("apple pomace") AND ("isoprene production")	("orange" OR "citrus" OR "mandarin") AND ("isoprene production")	("orange peel" OR "citrus peel" OR "mandarin peel") AND ("isoprene production")	("banana") AND ("isoprene production")	("banana peel") AND ("isoprene production")	("potato pulp") AND ("isoprene production")	("sweet potato pulp") AND ("isoprene production")	("sweet potato") AND ("isoprene production")	barley AND "Isoprene"	( "malt* rootlets" OR "malt* germ" OR "malt* waste" ) AND "Isoprene"	"spent grains" AND "Isoprene"	("rapeseed") AND ( "Isoprene production" ) AND NOT ( "straw" OR "stalks" OR "rapeseed oil" )	( "rapeseed meal" OR "rapeseed cake" OR "rapeseed filter" OR "canola meal" ) AND ( "Isoprene production" )
	Research Portal	Scopus	Scopus	Scopus	Scopus	Scopus	Scopus	Scopus	Scopus	Scopus	Scopus	Scopus	Scopus	Scopus	Scopus	Scopus	Scopus	Scopus	Scopus	Scopus	Scopus	Scopus	Scopus	Scopus	Scopus	Scopus	Scopus	Scopus	Scopus	Scopus	Scopus	Scopus	Scopus	Scopus
	Hits	1	0	0	0	0	0	3	0	0	0	0	0	0	0	0	0	1	0	0	0	0	0	0	0	0	0	0	3	0	0	0	0	0
	Platform Chemical	Succinic Acid	Succinic Acid	Succinic Acid	Succinic Acid	Succinic Acid	Succinic Acid	Succinic Acid	Succinic Acid	Succinic Acid	Succinic Acid	Succinic Acid	Succinic Acid	Succinic Acid	Succinic Acid	Succinic Acid	Succinic Acid	Succinic acid	Succinic Acid	Succinic Acid	Succinic Acid	Succinic Acid	Succinic Acid	Succinic Acid	Succinic Acid	Succinic Acid	Succinic Acid	Succinic Acid	Succinic Acid	Succinic Acid	Succinic Acid	Succinic Acid	Succinic Acid	Succinic Acid
	Search Query	("whole corn" OR "corn" OR "maize" OR "whole maize") AND ("succinic acid production")	("corn germ" OR "maize germ") AND ("succinic acid production")	("corn pericarp" OR "maize pericarp") AND ("succinic acid production")	("wheat" OR "whole wheat") AND ("succinic acid production")	("bran" OR "bran of wheat" OR "wheat bran") AND ("succinic acid production")	("germ" OR "germ of wheat" OR "wheat germ") AND ("succinic acid production")	("potato" OR "whole potato") AND ("succinic acid production")	("tomato" OR "whole tomato") AND ("succinic acid production")	("tomato pomace" OR "tomato seeds" OR "tomato skin") AND ("succinic acid production")	("sugarcane" OR "sugar cane" OR "whole sugarcane" OR "whole sugar cane") AND ("succinic acid production")AND NOT ( "bagasse" OR "molasses" )	("bagasse") AND ("succinic acid production")	("sugar cane molasses" OR "sugarcane molasses") AND ("succinic acid production")	("filtercake" OR "filter cake") AND ("succinic acid production")	( "beet" OR "sugar beet" OR "sugar beet" OR "whole beet" OR "beetroot" OR "sugar beetroot" ) AND ( "succinic acid production" ) AND NOT ( "pulp" OR "molasses" )	("beet pulp") AND ("succinic acid production")	("sugar beet molasses" OR "beet molasses") AND ("succinic acid production")	("rice") AND ("succinic acid production")	("rice hull" OR "rice husk") AND ("succinic acid production")	("rice bran") AND ("succinic acid production")	("apple") AND ("succinic acid production")	("apple pomace") AND ("succinic acid production")	("orange" OR "citrus" OR "mandarin") AND ("succinic acid production") AND NOT ( "peel")	("orange peel" OR "citrus peel" OR "mandarin peel") AND ("succinic acid production")	("banana") AND ("succinic acid production")	("banana peel") AND ("succinic acid production")	("potato pulp") AND ("succinic acid production")	("sweet potato pulp") AND ("succinic acid production")	("sweet potato") AND ("succinic acid production")	( "barley" ) AND ( "succinic acid production" )	( "malt* rootlets" OR "malt* germ" OR "malt* waste" ) AND "succinic acid production"	( "spent grains" AND "succinic acid production" )	("rapeseed") AND ("succinic acid production" ) AND NOT ( "straw" OR "stalks" OR "rapeseed oil" )	( "rapeseed meal" OR "rapeseed cake" OR "rapeseed filter" OR "canola meal" ) AND ( "succinic acid production" )
	Research Portal	Scopus	Scopus	Scopus	Scopus	Scopus	Scopus	Scopus	Scopus	Scopus	Scopus	Scopus	Scopus	Scopus	Scopus	Scopus	Scopus	Scopus	Scopus	Scopus	Scopus	Scopus	Scopus	Scopus	Scopus	Scopus	Scopus	Scopus	Scopus	Scopus	Scopus	Scopus	Scopus	Scopus
	Hits	45	0	0	12	5	0	2	0	0	5	22	3	0	1	2	1	4	1	0	3	2	1	4	0	0	0	0	1	1	0	0	2	2
	Platform Chemical	3-HP / 3-HPA	3-HP / 3-HPA	3-HP / 3-HPA	3-HP / 3-HPA	3-HP / 3-HPA	3-HP / 3-HPA	3-HP / 3-HPA	3-HP / 3-HPA	3-HP / 3-HPA	3-HP / 3-HPA	3-HP / 3-HPA	3-HP / 3-HPA	3-HP / 3-HPA	3-HP / 3-HPA	3-HP / 3-HPA	3-HP / 3-HPA	3-HP	3-HP	3-HP	3-HP	3-HP	3-HP	3-HP	3-HP	3-HP	3-HP	3-HP	3-HP	3-HP	3-HP	3-HP	3-HP	3-HP
	Search Query	("whole corn" OR "corn" OR "maize" OR "whole maize") AND ( "3-HP production" OR "3-HPA production" OR "3-Hydroxypropionic acid production" OR "3-hydroxypropionaldehyde production")	("corn germ" OR "maize germ") AND ( "3-HP production" OR "3-HPA production" OR "3-Hydroxypropionic acid production" OR "3-hydroxypropionaldehyde production")	("corn pericarp" OR "maize pericarp")AND ( "3-HP production" OR "3-HPA production" OR "3-Hydroxypropionic acid production" OR "3-hydroxypropionaldehyde production")	("wheat" OR "whole wheat") AND ( "3-HP production" OR "3-HPA production" OR "3-Hydroxypropionic acid production" OR "3-hydroxypropionaldehyde production")	("bran" OR "bran of wheat" OR "wheat bran") AND ( "3-HP production" OR "3-HPA production" OR "3-Hydroxypropionic acid production" OR "3-hydroxypropionaldehyde production")	("germ" OR "germ of wheat" OR "wheat germ") AND ( "3-HP production" OR "3-HPA production" OR "3-Hydroxypropionic acid production" OR "3-hydroxypropionaldehyde production")	("potato" OR "whole potato") AND ( "3-HP production" OR "3-HPA production" OR "3-Hydroxypropionic acid production" OR "3-hydroxypropionaldehyde production")	("tomato" OR "whole tomato") AND ( "3-HP production" OR "3-HPA production" OR "3-Hydroxypropionic acid production" OR "3-hydroxypropionaldehyde production")	("tomato pomace" OR "tomato seeds" OR "tomato skin") AND ( "3-HP production" OR "3-HPA production" OR "3-Hydroxypropionic acid production" OR "3-hydroxypropionaldehyde production")	("sugarcane" OR "sugar cane" OR "whole sugarcane" OR "whole sugar cane") AND ( "3-HP production" OR "3-HPA production" OR "3-Hydroxypropionic acid production" OR "3-hydroxypropionaldehyde production")	("bagasse") AND ( "3-HP production" OR "3-HPA production" OR "3-Hydroxypropionic acid production" OR "3-hydroxypropionaldehyde production")	("sugar cane molasses" OR "sugarcane molasses") AND ( "3-HP production" OR "3-HPA production" OR "3-Hydroxypropionic acid production" OR "3-hydroxypropionaldehyde production")	("filtercake" OR "filter cake") AND ( "3-HP production" OR "3-HPA production" OR "3-Hydroxypropionic acid production" OR "3-hydroxypropionaldehyde production")	("beet" OR "sugar beet" OR "sugar beet" OR "whole beet" OR "beetroot" OR "sugar beetroot") AND ( "3-HP production" OR "3-HPA production" OR "3-Hydroxypropionic acid production" OR "3-hydroxypropionaldehyde production")	("beet pulp") AND ( "3-HP production" OR "3-HPA production" OR "3-Hydroxypropionic acid production" OR "3-hydroxypropionaldehyde production")	("sugar beet molasses" OR "beet molasses") AND ( "3-HP production" OR "3-HPA production" OR "3-Hydroxypropionic acid production" OR "3-hydroxypropionaldehyde production")	("rice") AND ( "3-HP production" OR "3-Hydroxypropionic acid production" )	("rice hull" OR "rice husk") AND ( "3-HP production" OR "3-Hydroxypropionic acid production" )	("rice bran") AND ( "3-HP production" OR "3-Hydroxypropionic acid production" )	("apple") AND ( "3-HP production" OR "3-Hydroxypropionic acid production" )	("apple pomace") AND ( "3-HP production" OR "3-Hydroxypropionic acid production" )	("orange" OR "citrus" OR "mandarin") AND ( "3-HP production" OR "3-Hydroxypropionic acid production" )	("orange peel" OR "citrus peel" OR "mandarin peel") AND ( "3-HP production" OR "3-Hydroxypropionic acid production" )	("banana") AND ( "3-HP production" OR "3-Hydroxypropionic acid production" )	("banana peel") AND ( "3-HP production" OR "3-Hydroxypropionic acid production" )	("potato pulp") AND ( "3-HP production" OR "3-Hydroxypropionic acid production" )	("sweet potato pulp") AND ( "3-HP production" OR "3-Hydroxypropionic acid production" )	("sweet potato") AND ( "3-HP production" OR "3-Hydroxypropionic acid production" )	barley AND "3-HP"	( "malt* rootlets" OR "malt* germ" OR "malt* waste" ) AND "3-HP"	"spent grains" AND "3-HP"	("rapeseed") AND ("3-HP production" OR "3-Hydroxypropionic acid production" ) AND NOT ( "straw" OR "stalks" OR "rapeseed oil" )	( "rapeseed meal" OR "rapeseed cake" OR "rapeseed filter" OR "canola meal" ) AND ( "3-HP production" OR "3-Hydroxypropionic acid production" )
	Research Portal	Scopus	Scopus	Scopus	Scopus	Scopus	Scopus	Scopus	Scopus	Scopus	Scopus	Scopus	Scopus	Scopus	Scopus	Scopus	Scopus	Scopus	Scopus	Scopus	Scopus	Scopus	Scopus	Scopus	Scopus	Scopus	Scopus	Scopus	Scopus	Scopus	Scopus	Scopus	Scopus	Scopus
	Hits	2	0	0	1	0	0	0	0	0	0	0	0	0	1	0	0	0	0	0	0	0	0	0	0	0	0	0	0	0	0	0	0	0
	Platform Chemical	Levulinic Acid	Levulinic Acid	Levulinic Acid	Levulinic Acid	Levulinic Acid	Levulinic Acid	Levulinic Acid	Levulinic Acid	Levulinic Acid	Levulinic Acid	Levulinic Acid	Levulinic Acid	Levulinic Acid	Levulinic Acid	Levulinic Acid	Levulinic Acid	Levulinic Acid	Levulinic Acid	Levulinic Acid	Levulinic Acid	Levulinic Acid	Levulinic Acid	Levulinic Acid	Levulinic Acid	Levulinic Acid	Levulinic Acid	Levulinic Acid	Levulinic Acid	Levulinic acid	Levulinic acid	Levulinic acid	Levulinic acid	Levulinic acid
	Search Query	("whole corn" OR "corn" OR "maize" OR "whole maize") AND ("levulinic acid production")	("corn germ" OR "maize germ") AND ("levulinic acid production")	("corn pericarp" OR "maize pericarp") AND ("levulinic acid production")	("wheat" OR "whole wheat") AND ("levulinic acid production")	("bran" OR "bran of wheat" OR "wheat bran") AND ("levulinic acid production")	("germ" OR "germ of wheat" OR "wheat germ") AND ("levulinic acid production")	("potato" OR "whole potato") AND ("levulinic acid production")	("tomato" OR "whole tomato") AND ("levulinic acid production")	("tomato pomace" OR "tomato seeds" OR "tomato skin") AND ("levulinic acid production")	("sugarcane" OR "sugar cane" OR "whole sugarcane" OR "whole sugar cane") AND ("levulinic acid production")AND NOT ( "bagasse" OR "molasses" )	("bagasse") AND ("levulinic acid production")	("sugar cane molasses" OR "sugarcane molasses") AND ("levulinic acid production")	("filtercake" OR "filter cake") AND ("levulinic acid production")	("beet" OR "sugar beet" OR "sugar beet" OR "whole beet" OR "beetroot" OR "sugar beetroot") AND ("levulinic acid production")	("beet pulp") AND ("levulinic acid production")	("sugar beet molasses" OR "beet molasses") AND ("levulinic acid production")	("rice") AND ("levulinic acid production")NOT ( "hull" OR "husk" OR "bran" OR "straw" )	("rice hull" OR "rice husk") AND ("levulinic acid production")	("rice bran") AND ("levulinic acid production")	("apple") AND ("levulinic acid production")	("apple pomace") AND ("levulinic acid production")	("orange" OR "citrus" OR "mandarin") AND ("levulinic acid production")AND NOT ( "peel")	("orange peel" OR "citrus peel" OR "mandarin peel") AND ("levulinic acid production")	("banana") AND ("levulinic acid production")	("banana peel") AND ("levulinic acid production")	("potato pulp") AND ("levulinic acid production")	("sweet potato pulp") AND ("levulinic acid production")	("sweet potato") AND ("levulinic acid production")	( "barley" ) AND ( "levulinic acid production" )	( "malt* rootlets" OR "malt* germ" OR "malt* waste" ) AND "levulinic acid production"	( "spent grains" AND "levulinic acid production" )	("rapeseed") AND ("levulinic acid production") AND NOT ( "straw" OR "stalks" OR "rapeseed oil" )	( "rapeseed meal" OR "rapeseed cake" OR "rapeseed filter" OR "canola meal" ) AND ("levulinic acid production")
	Research Portal	Scopus	Scopus		Scopus	Scopus	Scopus	Scopus	Scopus	Scopus	Scopus	Scopus	Scopus	Scopus	Scopus	Scopus	Scopus	Scopus	Scopus	Scopus	Scopus	Scopus	Scopus	Scopus	Scopus	Scopus	Scopus	Scopus	Scopus	Scopus	Scopus	Scopus	Scopus	Scopus
	Hits	9	0	0	3	0	0	2	1	0	1	14	1	0	1	0	1	0	5	0	0	0	0	2	0	0	0	0	0	1	0	0	0	0
	Platform Chemical	Lactic Acid	Lactic Acid	Lactic Acid	Lactic Acid	Lactic Acid	Lactic Acid	Lactic Acid	Lactic Acid	Lactic Acid	Lactic Acid	Lactic Acid	Lactic Acid	Lactic Acid	Lactic Acid	Lactic Acid	Lactic Acid	Lactic Acid	Lactic Acid	Lactic Acid	Lactic Acid	Lactic Acid	Lactic Acid	Lactic Acid	Lactic Acid	Lactic Acid	Lactic Acid	Lactic Acid	Lactic Acid	Lactic acid	Lactic acid	Lactic acid	Lactic acid	Lactic acid
	Search Query	("whole corn" OR "corn" OR "maize" OR "whole maize") AND ("lactic acid production")	("corn germ" OR "maize germ") AND ("lactic acid production")	("corn pericarp" OR "maize pericarp")AND ("lactic acid production")	( "wheat" OR "whole wheat" ) AND ( "lactic acid production" ) AND NOT ( "straw" )	("bran" OR "bran of wheat" OR "wheat bran") AND ("lactic acid production")	("germ" OR "germ of wheat" OR "wheat germ") AND ("lactic acid production")	("potato" OR "whole potato") AND ("lactic acid production")	( "tomato" OR "whole tomato" ) AND ( "lactic acid production" ) AND NOT ( "pomace" )	("tomato pomace" OR "tomato seeds" OR "tomato skin") AND ("lactic acid production")	("sugarcane" OR "sugar cane" OR "whole sugarcane" OR "whole sugar cane") AND ("lactic acid production")	("bagasse") AND ("lactic acid production")	("sugar cane molasses" OR "sugarcane molasses") AND ("lactic acid production")	( "filtercake" OR "filter cake" ) AND ( "sugarcane" ) AND ( "lactic acid production" )	( "beet" OR "sugar beet" OR "sugar beet" OR "whole beet" OR "beetroot" OR "sugar beetroot" ) AND ( "lactic acid production" ) AND NOT ( "molasses" OR "pulp" )	("beet pulp") AND ("lactic acid production")	("sugar beet molasses" OR "beet molasses") AND ("lactic acid production")	("rice") AND ("lactic acid production")NOT ( "hull" OR "husk" OR "bran" OR "straw" )	("rice hull" OR "rice husk") AND ("lactic acid production")	("rice bran") AND ("lactic acid production")	( "apple" ) AND ( "lactic acid production" ) AND NOT ( "pomace" OR "peel" OR "skin" OR "juice" )	("apple pomace") AND ("lactic acid production")	("orange" OR "citrus" OR "mandarin")AND ("lactic acid production")AND NOT ( "peel")	("orange peel" OR "citrus peel" OR "mandarin peel") AND ("lactic acid production")	( "banana" ) AND ( "lactic acid production" ) AND NOT ( "peel" OR "stem" )	("banana peel") AND ("lactic acid production")	("potato pulp") AND ("lactic acid production")	("sweet potato pulp") AND ("lactic acid production")	("sweet potato") AND ("lactic acid production")	( "barley" ) AND ( "lactic acid production" )	( "malt* rootlets" OR "malt* germ" OR "malt* waste" ) AND "lactic acid production"	( "spent grains" AND "lactic acid production" )	("rapeseed") AND ("lactic acid production") AND NOT ( "straw" OR "stalks" OR "rapeseed oil" )	( "rapeseed meal" OR "rapeseed cake" OR "rapeseed filter" OR "canola meal" ) AND ( "lactic acid production" )
	Research Portal	Scopus	Scopus	Scopus	Scopus	Scopus	Scopus	Scopus	Scopus	Scopus	Scopus	Scopus	Scopus	Scopus	Scopus	Scopus	Scopus	Scopus	Scopus	Scopus	Scopus	Scopus	Scopus	Scopus	Scopus	Scopus	Scopus	Scopus	Scopus	Scopus	Scopus	Scopus	Scopus	Scopus
	Hits	249	0	0	70	46	9	57	5	4	100	63	20	0	2	10	16	0	7	18	8	6	13	9	4	5	0	10	0	0	0	18	3	3
	Platform Chemical	Sorbitol	Sorbitol	Sorbitol	Sorbitol	Sorbitol	Sorbitol	Sorbitol	Sorbitol	Sorbitol	Sorbitol	Sorbitol	Sorbitol	Sorbitol	Sorbitol	Sorbitol	Sorbitol	Sorbitol	Sorbitol	Sorbitol	Sorbitol	Sorbitol	Sorbitol	Sorbitol	Sorbitol	Sorbitol	Sorbitol	Sorbitol	Sorbitol	Sorbitol	Sorbitol	Sorbitol	Sorbitol	Sorbitol
	Search Query	("whole corn" OR "corn" OR "maize" OR "whole maize") AND ("sorbitol production")	("corn germ" OR "maize germ") AND ("sorbitol production")	("corn pericarp" OR "maize pericarp") AND ("sorbitol production")	("wheat" OR "whole wheat") AND ("sorbitol production")	("bran" OR "bran of wheat" OR "wheat bran") AND ("sorbitol production")	("germ" OR "germ of wheat" OR "wheat germ") AND ("sorbitol production")	("potato" OR "whole potato") AND ("sorbitol production")	("tomato" OR "whole tomato") AND ("sorbitol production")	("tomato pomace" OR "tomato seeds" OR "tomato skin") AND ("sorbitol production")	("sugarcane" OR "sugar cane" OR "whole sugarcane" OR "whole sugar cane") AND ("sorbitol production")	("bagasse") AND ("sorbitol production")	("sugar cane molasses" OR "sugarcane molasses") AND ("sorbitol production")	("filtercake" OR "filter cake") AND ("sorbitol production")	("beet" OR "sugar beet" OR "sugar beet" OR "whole beet" OR "beetroot" OR "sugar beetroot") AND ("sorbitol production")	("beet pulp") AND ("sorbitol production")	("sugar beet molasses" OR "beet molasses") AND ("sorbitol production")	("rice") AND ("sorbitol production")	("rice hull" OR "rice husk") AND ("sorbitol production")	("rice bran") AND ("sorbitol production")	("apple") AND ("sorbitol production")	("apple pomace") AND ("sorbitol production")	("orange" OR "citrus" OR "mandarin") AND ("sorbitol production")	("orange peel" OR "citrus peel" OR "mandarin peel") AND ("sorbitol production")	("banana") AND ("sorbitol production")	("banana peel") AND ("sorbitol production")	("potato pulp") AND ("sorbitol production")	("sweet potato pulp") AND ("sorbitol production")	("sweet potato") AND ("sorbitol production")	( "barley" ) AND ( "sorbitol production" )	( "malt* rootlets" OR "malt* germ" OR "malt* waste" ) AND "sorbitol production"	( "spent grains" AND "sorbitol production" )	("rapeseed") AND ("sorbitol production") AND NOT ( "straw" OR "stalks" OR "rapeseed oil" )	( "rapeseed meal" OR "rapeseed cake" OR "rapeseed filter" OR "canola meal" ) AND ( "sorbitol production" )
	Research Portal	Scopus	Scopus	Scopus	Scopus	Scopus	Scopus	Scopus	Scopus	Scopus	Scopus	Scopus	Scopus	Scopus	Scopus	Scopus	Scopus	Scopus	Scopus	Scopus	Scopus	Scopus	Scopus	Scopus	Scopus	Scopus	Scopus	Scopus	Scopus	Scopus	Scopus	Scopus	Scopus	Scopus
	Hits	2	0	0	0	0	0	0	0	0	3	1	1	0	1	0	1	1	0	0	1	0	1	0	0	0	0	0	0	0	0	0	0	0
	Platform Chemical	Xylitol	Xylitol	Xylitol	Xylitol	Xylitol	Xylitol	Xylitol	Xylitol	Xylitol	Xylitol	Xylitol	Xylitol	Xylitol	Xylitol	Xylitol	Xylitol	Xylitol	Xylitol	Xylitol	Xylitol	Xylitol	Xylitol	Xylitol	Xylitol	Xylitol	Xylitol	Xylitol	Xylitol	Xylitol	Xylitol	Xylitol	Xylitol	Xylitol
	Search Query	("whole corn" OR "corn" OR "maize" OR "whole maize") AND ("xylitol production")	("corn germ" OR "maize germ") AND ("xylitol production")	("corn pericarp" OR "maize pericarp") AND ("xylitol production")	( "wheat" OR "whole wheat" ) AND ( "xylitol production" ) AND NOT ( "straw" OR "bran" )	("bran" OR "bran of wheat" OR "wheat bran") AND ("xylitol production")	("germ" OR "germ of wheat" OR "wheat germ") AND ("xylitol production")	("potato" OR "whole potato") AND ("xylitol production")	("tomato" OR "whole tomato") AND ("xylitol production")	("tomato pomace" OR "tomato seeds" OR "tomato skin") AND ("xylitol production")	("sugarcane" OR "sugar cane" OR "whole sugarcane" OR "whole sugar cane") AND ("xylitol production")	("bagasse") AND ("xylitol production")	("sugar cane molasses" OR "sugarcane molasses") AND ("xylitol production")	("filtercake" OR "filter cake") AND ("xylitol production")	("beet" OR "sugar beet" OR "sugar beet" OR "whole beet" OR "beetroot" OR "sugar beetroot") AND ("xylitol production")	("beet pulp") AND ("xylitol production")	("sugar beet molasses" OR "beet molasses") AND ("xylitol production")	("rice") AND ("xylitol production")NOT ( "hull" OR "husk" OR "bran" OR "straw" )	("rice hull" OR "rice husk") AND ("xylitol production")	("rice bran") AND ("xylitol production")	("apple") AND ("xylitol production")	("apple pomace") AND ("xylitol production")	("orange" OR "citrus" OR "mandarin") AND ("xylitol production")	("orange peel" OR "citrus peel" OR "mandarin peel") AND ("xylitol production")	("banana") AND ("xylitol production")AND NOT ( "peel" OR "stem" )	("banana peel") AND ("xylitol production")	("potato pulp") AND ("xylitol production")	("sweet potato pulp") AND ("xylitol production")	("sweet potato") AND ("xylitol production")	( "barley" ) AND ( "xylitol production" )	( "malt* rootlets" OR "malt* germ" OR "malt* waste" ) AND "xylitol production"	( "spent grains" AND "xylitol production" )	("rapeseed") AND ("xylitol production") AND NOT ( "straw" OR "stalks" OR "rapeseed oil" )	( "rapeseed meal" OR "rapeseed cake" OR "rapeseed filter" OR "canola meal" ) AND ( "xylitol production" )
	Research Portal	Scopus	Scopus	Scopus	Scopus	Scopus	Scopus	Scopus	Scopus	Scopus	Scopus	Scopus	Scopus	Scopus	Scopus	Scopus	Scopus	Scopus	Scopus	Scopus	Scopus	Scopus	Scopus	Scopus	Scopus	Scopus	Scopus	Scopus	Scopus	Scopus	Scopus	Scopus	Scopus	Scopus
	Hits	92	0	0	2	22	0	1	0	0	134	144	1	0	1	0	0	0	3	14	6	0	0	0	0	4	0	0	0	5	0	10	1	0

## Sheet: Yield_FLB_PC
PLFC	side stream	Yield	Unit of Yield	Standardized unit [w/w crop]	AVERAGE	std	Source	Notes?
ETHANOL	corn	0,487 - 0,395	L/kg Dry Corn	0.251325	0.276072	0.0499762	https://www.mdpi.com/2227-9717/7/9/578#app1-processes-07-00578
ETHANOL		36,13 - 34,69	%w/w Dry Corn	0.246738			https://www-sciencedirect-com.ezproxy.library.wur.nl/science/article/pii/S1359511316300010
ETHANOL		334.2-379.5	g Ethanol/kg Raw Corn	0.354973			Soaking in Aqueous Ammonia (SAA) Pretreatment of Whole Corn Kernels for Cellulosic Ethanol Production from the Fiber Fractions	https://www.mdpi.com/2311-5637/4/4/87
ETHANOL		34.2-37.9	yield g/g grain	0.251251			https://www.sciencedirect.com/science/article/pii/S0960852419301361?via%3Dihub#t0005
ETHANOL	corn germ	60,10 - 38,90	%w/w Germ meal	0.496333	0.496333	0	https://www.mdpi.com/2227-9717/10/4/661	SSCF Fermented 20%w/w
ETHANOL	corn pericarp	0.31-3.31	ethanol g/ 100 g dry matter	0.0107188	0.0107188	0	https://elibrary.asabe.org/abstract.asp?aid=27102
ETHANOL	whole wheat	78-55	%w/w Glucose and xylose in Wheat	0.486418	0.330876	0.0864142	https://www.sciencedirect.com/science/article/pii/S096195341300295X#tbl3fnc	SSCF 7.5
ETHANOL		50.16 - 29.98	%w/w Whole wheat	0.313589			https://www.sciencedirect.com/science/article/pii/S0957582007714428
ETHANOL		0.41	yield g/g glucose	0.290184			https://www.sciencedirect.com/science/article/pii/S1359511309000439?pes=vor#bib39
ETHANOL		0.3-0.46	yield g/g glucose	0.281084			https://analyticalsciencejournals.onlinelibrary.wiley.com/doi/full/10.1002/jctb.3822
ETHANOL		0.35-0.44	yield g/g glucose	0.283107			https://onlinelibrary.wiley.com/doi/10.1002/ceat.201400763
ETHANOL	wheat bran	21.5	%w/w Wheat bran	0.215	0.168039	0.0299909	https://www.sciencedirect.com/science/article/pii/S0141022910002607#fig0020	T. Hirsuta fermentation for 96h. 20g/l wb made 4.3g/L ethanol
ETHANOL		0.48 - 0.41	g ethanol/g glucose in Wheat bran	0.155018			https://www-sciencedirect-com.ezproxy.library.wur.nl/science/article/pii/S0961953412002784	S. cerevisiae s1
ETHANOL		0.45-0.50	yield (gethanol/g of consumed substrate)	0.167559			https://www.sciencedirect.com/science/article/pii/S0306261915011691?via%3Dihub
ETHANOL		0.31-0.49	yield (g/g glucose)	0.1476			https://www.sciencedirect.com/science/article/pii/S0306261912004357?via%3Dihub
ETHANOL		0.41-0.48	g ethanol /g consumed glucose	0.155018			https://www.sciencedirect.com/science/article/pii/S0961953412002784?via%3Dihub
ETHANOL	wheat germ	0.213778	theoretical yield	0.106889	0.106889		50% theoretical yield
ETHANOL	potato	0.4455-0.4623	g ethanol/g glucose in Potato	0.0708618	0.0714445	0.00146048	https://www.mdpi.com/2076-3417/2/4/738	Enzymatically hydrolyzed waste potato mash at pH 5.5 and 30 °C after 48 h of fermentation
ETHANOL		0.4599	g ethanol/g glucose in Potato	0.0717985			https://www.sciencedirect.com/science/article/pii/S0016236116303623?via%3Dihub
ETHANOL		0.91	Of the theoretical yield (theoretical, 0.511g)	0.0725962			https://link.springer.com/article/10.1007/s10068-013-0099-4	Production of a high concentration of ethanol from potato tuber by high gravity fermentation
ETHANOL		0.44	g ethanol/g glucose in Potato	0.0686917			https://www.mdpi.com/1422-0067/16/10/24490
ETHANOL		94%-89.7%	Of the theoretical yield (theoretical, 0.511g)	0.0732743			https://www.sciencedirect.com/science/article/pii/S0961953409000233?via%3Dihub#sec2
ETHANOL	tomato	26	m3 eth/Gg tomato	0.020514	0.020514	0	https://www.sciencedirect.com/science/article/pii/S0961953417302349	theoretical ethanol yield from fermentation of galacturonic acid followed an equimolar production of acetate and ethanol by the ethanologenic construct of E. coli KO11
ETHANOL	tomato pomace	5.21	g eth/100g dry tomato pomace	0.0521	0.0521	0	https://link-springer-com.ezproxy.library.wur.nl/article/10.1007/s12155-019-10016-7	thermal pretreatment, enzymatic hydrolisis etc, Alcoholic fermentaiton K. Marxianus DSM 5422
ETHANOL	sugarcane	74.7 - 63.85	% of theoretical yield	0.0768419	0.0758101	0.0103434	https://biotechnologyforbiofuels.biomedcentral.com/articles/10.1186/s13068-015-0224-0	sulfuric acid pretreatment, enzymatic hydrolisis, alcoholic fermentation S. cerevisiae CAT-1
ETHANOL		77.5 - 51.5	% of theoretical yield	0.0690867			https://www.scopus.com/record/display.uri?eid=2-s2.0-34548021881&origin=resultslist&sort=r-f&src=s&sid=98710797b13ce2eaab7165cc3f6aaa48&sot=b&sdt=b&s=TITLE-ABS-KEY%28%28+%22sugarcane%22+OR+%22sugar+cane%22+OR+%22whole+sugarcane%22+OR+%22whole+sugar+cane%22+%29+AND+%28+%22ethanol+production%22+%29+AND+%28+%22yield%22+%29%29&sl=133&sessionSearchId=98710797b13ce2eaab7165cc3f6aaa48	Kluyveromyces marxianus DMKU 3-1042
ETHANOL		85	% of theoretical yield	0.0938527			https://www.sciencedirect.com/science/article/pii/S0960852411002008	thermotolerant strain of P. kudriavzevii
ETHANOL		0.232-0.392	yield g/g glucose	0.0663265			https://www.sciencedirect.com/science/article/pii/S0960852412016409#t0015
ETHANOL		0.34-0.42	yield g/g glucose	0.0729426			https://onlinelibrary.wiley.com/doi/full/10.1111/gcbb.12891
ETHANOL	sugarcane bagasse	58.16 - 54.69	% of theoretical yield	0.203234	0.235241	0.0757598	https://biotechnologyforbiofuels.biomedcentral.com/articles/10.1186/s13068-015-0224-0	sulfuric acid pretreatment, enzymatic hydrolisis, alcoholic fermentation S. cerevisiae CAT-1
ETHANOL		0.49 - 0.46	g eth/g hydrolized bagasse	0.325505			https://www.scopus.com/record/display.uri?eid=2-s2.0-85173894582&origin=resultslist&sort=plf-f&src=s&sid=a82dc4bbcb1579116418651cac7c446d&sot=b&sdt=b&s=TITLE-ABS-KEY%28%28%22bagasse%22%29+AND+%28%22ethanol+production%22%29%29&sl=53&sessionSearchId=a82dc4bbcb1579116418651cac7c446d
ETHANOL		210	mg eth/g bagasse	0.21			https://www.scopus.com/record/display.uri?eid=2-s2.0-85163169278&origin=resultslist&sort=plf-f&src=s&sid=a82dc4bbcb1579116418651cac7c446d&sot=b&sdt=b&s=TITLE-ABS-KEY%28%28%22bagasse%22%29+AND+%28%22ethanol+production%22%29%29&sl=53&sessionSearchId=a82dc4bbcb1579116418651cac7c446d
ETHANOL		8.65 - 5.35	Input of bagasse, kg/L ethanol	0.122963			https://www.scopus.com/record/display.uri?eid=2-s2.0-80755187758&origin=resultslist&sort=r-f&src=s&sid=a82dc4bbcb1579116418651cac7c446d&sot=b&sdt=b&s=TITLE-ABS-KEY%28%28+%22bagasse%22+%29+AND+%28+%22ethanol+production%22+%29+AND+%22yield%22%29&sl=53&sessionSearchId=a82dc4bbcb1579116418651cac7c446d	SHF
ETHANOL		0.45-0.21	g eth/g sugar in scb	0.314502			https://sci-hub.se/10.1016/j.renene.2012.07.003
ETHANOL	sugarcane molasses	0.421 - 0.416	g eth/g sugar in molasses	0.114543	0.0988848	0.0313295	https://www.scielo.br/j/bjm/a/tMZzMhg7xVLL9QqsrKNRzSx/?lang=en#
ETHANOL		85.12 - 65.57	% theoretical yield	0.0905502			https://openscholar.dut.ac.za/bitstream/10321/888/1/nofemele_sure_et_al_2012.pdf
ETHANOL		0.46 - 0.24	g eth/g substrate	0.140667			https://www.sciencedirect.com/science/article/pii/S0961953412004424	CSTR
ETHANOL		46.2	% theoretical yield	0.0555928			https://www.sciencedirect.com/science/article/pii/S096014811000340X
ETHANOL		0.24-0.42	yield g/g glucose	0.0930705			https://www.sciencedirect.com/science/article/pii/S0960852406004512?casa_token=DCUUSwqzhwEAAAAA:AAb0EcEw6557QDvSW4FnO_HMzZ2lNRJFKv_YbEeusuUBFDllci87FSqGp6XZBwC-wa_0KQY#tbl2
ETHANOL	sugar beet	490.4	L eth/Ton Sugar Beet	0.0844763	0.0744884	0.0121963	https://www.sciencedirect.com/science/article/pii/S0959652617309824	US focus
ETHANOL		0.502 - 0.281	g/g sucrose in beets	0.0828671			https://hrcak.srce.hr/file/87226	Batch
ETHANOL		3.55	ethanol yield (m³/ha)	0.064643			https://mediathek.fnr.de/downloadable/download/sample/sample_id/168/	N. Schmitz-Bioethanol in Deutschland- Bundesministerium für Verbraucherschutz, Ernaehrung und Landwirtschaft, Münster Deutschland (2003)
ETHANOL		26.72-49.1	Ethanol (% of Dry Weight)	0.0556553			https://www.sciencedirect.com/science/article/pii/S1878818117301998?pes=vor#t0005	Steam explosion and fermentation of sugar beets from Southern Florida and the Midwestern United States
ETHANOL		0.10 (490.40)	kg dry sugar beet/MJEtOH (LEtOH/tdry sugar beet)	0.0848			https://www.sciencedirect.com/science/article/pii/S0959652617309824#tbl4	Sugar beet ethanol (Beta vulgaris L.): A promising low-carbon pathway for ethanol production in California
ETHANOL	sugar beet pulp	0.144 - 0.092	g eth/ g dry SBP	0.02596	0.0535188	0.0239688	https://www-sciencedirect-com.ezproxy.library.wur.nl/science/article/pii/S0306261911008907	E. coli KO11
ETHANOL		95 - 5.7	L eth/ 100 kg SBP	0.0652897			https://onlinelibrary.wiley.com/doi/full/10.1002/jib.181	Stationary culture, S. Cervisiae, Pasteurized, Ethanol Red
ETHANOL		97.5	gallon ethanol per ton dry SBP	0.0524689			https://www.eurekaselect.com/article/70433
ETHANOL		0.122 - 0.005	g eth/ g SBP	0.0922			Ethanol fermentation characteristics of Pichia stipitis yeast from sugar beet pulp hydrolysate: Use of new detoxification methods - ScienceDirect
ETHANOL		0.32	g eth/ g glucose	0.0316755			https://elibrary.asabe.org/abstract.asp??JID=3&AID=37124&CID=biee2010&v=3&i=4&T=1
ETHANOL	sugar beet molasses	0.52 - 0.46	g eth/ g glucose	0.1027	0.120875	0.0281243	https://dergipark.org.tr/tr/download/article-file/1369920	E Coli TS3
ETHANOL		99.5 - 78.9	% of theoretical	0.0963306			https://www.mdpi.com/2311-5637/7/2/86
ETHANOL		31.7 - 2	L eth/ 100kg Molasses	0.167882			https://onlinelibrary.wiley.com/doi/full/10.1002/jib.536?sid=worldcat.org	Immobilised S. Cervisiae cells at an initial sugar concentration of 175 g/L
ETHANOL		0.49 - 0.44	g eth/ g Molasses	0.0986892			https://www-sciencedirect-com.ezproxy.library.wur.nl/science/article/pii/S0141022911000044	S. cerevisiae entrapped in an alginate–maize stem ground tissue matrix
ETHANOL		0.42-0.49	g ethanol /g sugar	0.138772
ETHANOL	rice grain	75.02-101.38	g/L	0.39	0.403918	0.0144815	https://www.sciencedirect.com/science/article/pii/S096085241931452X?pes=vor#s0010
ETHANOL		0.463-0.47	g/g sugar	0.384002			https://pubs.rsc.org/en/content/articlelanding/2015/ra/c5ra17797a
ETHANOL		53.18	g/L	0.409859			https://www.sciencedirect.com/science/article/pii/S0196890424000463?pes=vor#b0250
ETHANOL		54.1-62.45	g/L	0.41375			https://www.nature.com/articles/s41598-022-06245-0/tables/2
ETHANOL		49.96-58.93	g/L	0.42198			https://www.nature.com/articles/s41598-022-06245-0/tables/2
ETHANOL	rice hull	0.47	g-ethanol/g-glucose in rice hull	0.164876	0.207426	0.0471445	https://www.scopus.com/record/display.uri?eid=2-s2.0-84859838302&origin=resultslist&sort=plf-f&src=s&sid=770bdfea32c2728de40361b11b940c79&sot=a&sdt=a&s=TITLE-ABS-KEY%28%28%22rice+hull%22%29+AND+%28%22ethanol+production%22%29%29&sl=55&sessionSearchId=770bdfea32c2728de40361b11b940c79&relpos=13
ETHANOL		0.303392	g ethanol/g sugar	0.14584			https://aiche.onlinelibrary.wiley.com/doi/10.1002/btpr.2275
ETHANOL		0.535	g ethanol/g sugar	0.257175			https://www.sciencedirect.com/science/article/pii/S0960852410020237?pes=vor#s0025
ETHANOL		0.52	g ethanol/g glucose	0.182416			https://www.sciencedirect.com/science/article/pii/S0960852410020237?pes=vor#s0026
ETHANOL		347.25	L ethanol/ton rice hull	0.274328			https://www.scopus.com/record/display.uri?eid=2-s2.0-79955907236&origin=resultslist&sort=plf-f&src=s&sid=770bdfea32c2728de40361b11b940c79&sot=a&sdt=a&s=TITLE-ABS-KEY%28%28%22rice+hull%22%29+AND+%28%22ethanol+production%22%29%29&sl=55&sessionSearchId=770bdfea32c2728de40361b11b940c79&relpos=15
ETHANOL		0.4575	g ethanol/g total Sugar	0.21992			https://www.sciencedirect.com/science/article/pii/S0960852412019931?pes=vor
ETHANOL	rice bran	3.498-13.4	Ethanol production (g/L)	0.04	0.070427	0.0236427	https://www-sciencedirect-com.ezproxy.library.wur.nl/science/article/pii/S1871678414006736#sec0065
ETHANOL		0.23-0.33	g/g of sugar	0.0758436			https://link.springer.com/article/10.1007/s10163-022-01538-y
ETHANOL		0.42	g/g of sugar	0.111552			https://www.degruyter.com/document/doi/10.2202/1556-3758.1453/html
ETHANOL		0.14-0.33	g/g of sugar	0.0593173			https://link.springer.com/article/10.1007/s12355-013-0219-8
ETHANOL		0.28-0.5	g/g of glucose	0.0654223			https://link.springer.com/article/10.1007/s13399-022-03252-z
ETHANOL	apple	66.5-88.9	L/ton apple	0.060979	0.0597572	0.0108147	https://link.springer.com/article/10.1007/s12155-023-10627-1
ETHANOL		0.47-0.49	g/g of sugar	0.0670527			https://link.springer.com/article/10.1007/s12010-009-8781-y#Tab1
ETHANOL		0.0618-0.0742	g ethanol /g raw material	0.068			https://www.sciencedirect.com/science/article/pii/S0960852414016125?via%3Dihub#t0020
ETHANOL		0.41-0.49	g/g of sugar	0.0640593			https://docserver-ingentaconnect-com.ezproxy.library.wur.nl/deliver/connect/asp/15566560/v8n1/s14.pdf?expires=1708548221&id=0000&titleid=72010009&checksum=69ED311529DC2160386D3FBC70F6C858&host=https://www-ingentaconnect-com.ezproxy.library.wur.nl
ETHANOL		0.19-0.341	g/g of sugar	0.038695			https://www.scopus.com/record/display.uri?eid=2-s2.0-80051684112&origin=resultslist&sort=r-f&src=s&sid=8e2249bd6afc38b3a5c479f5c24fcb22&sot=b&sdt=b&s=TITLE-ABS-KEY%28%28+%22apple%22+%29+AND+%28+%22ethanol+production%22+%29%29&sl=104&sessionSearchId=8e2249bd6afc38b3a5c479f5c24fcb22&relpos=10
ETHANOL	apple pomace	0.02-0.47	g/g of sugar	0.242982	0.265938	0.0842755	https://www.sciencedirect.com/science/article/pii/S0016236120327812?via%3Dihub#t0010
ETHANOL		0.342-0.46	g/g of sugar	0.270483			https://www.sciencedirect.com/science/article/pii/S0961953420303202?via%3Dihub#tbl2
ETHANOL		244.9	g ethanol/kg dry based apple pomace	0.220924			https://www.sciencedirect.com/science/article/pii/S0360544221027183?via%3Dihub#tbl4
ETHANOL		173.3	g ethanol/kg apple pomace	0.1733			https://www.sciencedirect.com/science/article/pii/S0960148123003518?via%3Dihub#tbl3
ETHANOL		0.389-0.945	g/g of sugar	0.422002			https://www.sciencedirect.com/science/article/pii/S0360544215006921?via%3Dihub#tbl3
ETHANOL	orange	3.7-5.4	wt% orange waste	0.0463333	0.0499384	0.0238705	https://pubs-rsc-org.ezproxy.library.wur.nl/en/content/articlelanding/2013/ra/c3ra43722a
ETHANOL		0.58-1.4	g ethanol/g reducing sugar	0.0966164			https://www.sciencedirect.com/science/article/pii/0922338X89902572?via%3Dihub
ETHANOL		0.31-0.85	g from 4.2 g of dry CPWO (Citrus processing waste from oranges)	0.0305708			https://www.scielo.br/j/jbchs/a/XkTfhPwZwKNyNpLxsXvRM6s/?lang=en&format=pdf
ETHANOL		13	ethanol production (gal/t of culled oranges)	0.038827			https://link.springer.com/article/10.1385/ABAB:113:1-3:095
ETHANOL		73.5-85.9	% theoretical yield	0.0373446			https://elibrary.asabe.org/abstract.asp?aid=29174
ETHANOL	orange peel	80	% theoretical yield	0.0644171	0.0680324	0.0025896	https://link.springer.com/article/10.1007/s11274-007-9346-2#Sec2
ETHANOL		0.40-0.46	ethanol yield (g/g sugar)	0.0693335			https://pubs.acs.org/doi/10.1021/jf903163t
ETHANOL		0.39-0.67	product yield [g ethanol / g sugars]	0.0703465			https://academic.oup.com/lambio/article-abstract/62/1/75/6699684?redirectedFrom=fulltext
ETHANOL	banana	111.5-157.2	EtOH production potential (l t−1 fw)	0.105147	0.0554365	0.0269298	https://www.sciencedirect.com/science/article/pii/S0961953411001413?via%3Dihub#tbl4
ETHANOL		346.5	the volume of bio-fuel produced (Vp) in relation to 1 t of dry biomass (mb))	0.0598721			https://www.sciencedirect.com/science/article/pii/S0360544210001817#tbl6
ETHANOL		3.66	g bioethanol/g yield cell	0.0455363			https://iopscience.iop.org/article/10.1088/1742-6596/2049/1/012084/pdf
ETHANOL		0.452	(g/g) Weight of ethanol produces/Mass of glucose utilized	0.038715			https://www.scopus.com/record/display.uri?eid=2-s2.0-84893926485&origin=resultslist&sort=r-f&src=s&sid=2000dec68bbc9a91a692683d626c4879&sot=b&sdt=b&s=TITLE-ABS-KEY%28%28+%22banana%22+%29+AND+%28+%22ethanol+production%22+%29+AND+NOT+%28+%22peel%22+OR+%22stem%22+OR+%22leaf%22+%29%29&sl=55&sessionSearchId=2000dec68bbc9a91a692683d626c4879&relpos=7
ETHANOL		0.159-0.182	Y P/RS (g ethanol/g reduced sugar)	0.0279117			https://link.springer.com/article/10.1007/s11274-023-03588-2#Tab1
ETHANOL	banana peel	144.8-217.9	Yield of Ethanol (g/Kg) of biomass	0.0258681	0.081924	0.0571669	https://www.sciencedirect.com/science/article/pii/S1364032123009486?via%3Dihub#tbl2
ETHANOL		0.024	Predicted volume of ethanol/ available banana peel (L/ton)	0.0240186			https://link.springer.com/article/10.1007/s13399-020-00880-1
ETHANOL		0.0236	EtOH yield, Yp/s ( mg mg−1)	0.06018			https://www.sciencedirect.com/science/article/pii/S0964830519306900?via%3Dihub#tbl1
ETHANOL		0.14-0.43	Ethanol product yield on sugar basis (g/g)	0.140715			https://www.sciencedirect.com/science/article/pii/S0956053X11000742?via%3Dihub#t0030
ETHANOL		0.226-0.378	ethanol yield (g/g sugar)	0.158838			https://link.springer.com/article/10.1007/s12088-007-0057-z
ETHANOL	potato pulp	79	ethanol g/L	0.0559347	0.0639545	0.00801982	https://link.springer.com/article/10.1186/s13068-016-0464-7
ETHANOL		0.025-0.183	avrg Ethanol production (mL·g-1 )	0.0719743			https://www.scientific.net/AMR.805-806.281
ETHANOL	sweet potato	0.42-1.02	Ethanol production yield (mmol EtOH/g sweet potato)	0.03174	0.103489	0.038426	https://www.sciencedirect.com/science/article/pii/S0959652611005683?via%3Dihub#tbl6
ETHANOL		76.63-84.96	Ethanol, final (g/kg)	0.110576			https://iubmb.onlinelibrary.wiley.com/doi/10.1002/bab.1190
ETHANOL		1.2-38.6	ethanol g/L	0.104342			https://link.springer.com/article/10.1007/s42452-021-04369-y
ETHANOL		0.144	yield ethanol / sweet potato	0.144			https://www.sciencedirect.com/science/article/abs/pii/S0960852412017099?via%3Dihub
ETHANOL		55.59-90.16	Yield [theoretical production %]	0.126786			https://www.scientific.net/AMR.236-238.59
ETHANOL	sweet potato pulp	0.105875	theoretical yield	0.0529373	0.0529373	0	50% theoretical yield
ETHANOL	barley	41,7-52,5	g/L yield	0.07	0.21621		(PDF) Ethanol Production from Winter Hulless Barley (researchgate.net)
ETHANOL		28,5-30	% (w/w)	0.3			Scopus - Document details - Scale-up of ethanol production from winter barley by the EDGE (enhanced dry grind enzymatic) process in fermentors up to 300 l (uu.nl)
ETHANOL		0.32-0.4	g/g of sugar	0.26			Combined fermentation for increasing efficiency of bioethanol production from Fusarium sp. contaminated barley biomass - ScienceDirect
ETHANOL		354	L/ton of barley	0.27			Bioethanol production from renewable sources_ Current perspectives and technological progress (sciencedirectassets.com)
ETHANOL		0.3621	g of ethanol g of barley THEORETICAL	0.18105			50% theoretical yield
ETHANOL	spent grains	65	g of ethanol kg of spent grains	0.065	0.128966		Evaluation of Fusarium oxysporum as an enzyme factory for the hydrolysis of brewer's spent grain with improved biodegradability for ethanol production - ScienceDirect (uu.nl)
ETHANOL		251	L of ethanol/ton of BSG	0.19829			One-pot bioethanol production from brewery spent grain using the ethanologenic Escherichia coli MS04 - ScienceDirect (uu.nl)
ETHANOL		17.9	g in 100 g of BSG	0.179			Ethanol Production from Brewers’ Spent Grain Pretreated by Dilute Phosphoric Acid | Energy & Fuels (uu.nl)
ETHANOL		0.0289625		0.0289625			Intensifying ethanol production from brewer’s spent grain waste: Use of whole slurry at high solid loadings - ScienceDirect (uu.nl)
ETHANOL		0.17358		0.17358			Improved ethanol production from the slurry of pretreated brewers’ spent grain through different co-fermentation strategies - ScienceDirect (uu.nl)
ETHANOL	rapeseed	20.2-36.6	g/L Ethanol production	0.0215832	0.0110994		Simultaneous saccharification and fermentation of lignocellulosic residues pretreated with phosphoric acid–acetone for bioethanol production	https://www.sciencedirect.com/science/article/pii/S0960852409000479?pes=vor#tbl4
ETHANOL		9.8	g/L Ethanol production	0.0372801			Integrated production of cellulosic bioethanol and succinic acid from rapeseed straw after dilute-acid pretreatment	https://doi.org/10.1016/j.biortech.2018.05.099
ETHANOL	rapeseed meal	0.0791588	theoretical yield	0.0395794	0.0395794	0	50% theoretical yield
FURFURAL	corn	93 - 1.9	% furfural yield (moles furfural/moles xylan in corn)	0.0904637	0.0542536	0.0345614	https://www.sciencedirect.com/science/article/pii/S0960852417313822
FURFURAL		73.9 - 22.7	% furfural yield (moles furfural/moles xylose in corn)	0.0119859			https://www.sciencedirect.com/science/article/pii/S0960852416316182
FURFURAL		71.2 - 48.26	% furfural yield (moles furfural/moles xylan in corn)	0.0150311			https://www.sciencedirect.com/science/article/pii/S096085241631639X
FURFURAL		79.6 - 55.6	% furfural yield (moles furfural/moles xylan in corn)	0.0893672			https://www.sciencedirect.com/science/article/pii/S0960852413016866
FURFURAL		66.2 - 24	% furfural yield (moles furfural/moles xylan in corn)	0.0644201			https://www.sciencedirect.com/science/article/pii/S0959652620354561
FURFURAL	corn germ	0	theoretical yield	0	0	0	50% theoretical yield
FURFURAL	corn pericarp	0.112716	theoretical yield	0.056358	0.056358	0	50% theoretical yield	core-shell sulfonated tin-loaded diatomite catalyst, namely SO42−/CX-DMSn
FURFURAL	whole wheat	0.0295012	theoretical yield	0.0147506	0.0147506	1	50% theoretical yield
FURFURAL	wheat bran	0.111262	theoretical yield	0.0556308	0.0556308	0	50% theoretical yield
FURFURAL	wheat germ	0	theoretical yield	0	0	0	50% theoretical yield
FURFURAL	potato	0.0014544	theoretical yield	0.0007272	0.0007272	0	50% theoretical yield
FURFURAL	tomato	0.00276336	theoretical yield	0.00138168	0.00138168	0	50% theoretical yield
FURFURAL	tomato pomace	0.0109807	theoretical yield	0.00549036	0.00549036	0	50% theoretical yield
FURFURAL	sugarcane	49.9	mg furfural / g sugarcane STRAW	0.0499	0.0499	0	Furfural production from lignocellulosic biomass by ultrasound-assisted acid hydrolysis - ScienceDirect (wur.nl)
FURFURAL	sugarcane bagasse	59.5	Furfural yield (%): % molar yield based on Xylose	0.0789146	0.161789	0.173127	A review on solvent systems for furfural production from lignocellulosic biomass - ScienceDirect
FURFURAL		18-53	Furfural yield (%): % molar yield based on Xylose	0.0470835			A review on solvent systems for furfural production from lignocellulosic biomass - ScienceDirect	UAAH conversion, HNO3
FURFURAL		15.7 - 8.5	% mass bagasse	0.1174			Furfural production from biomass–derived carbohydrates and lignocellulosic residues via heterogeneous acid catalysts - ScienceDirect	ROSENLEW & SHELL	https://www.sciencedirect.com/science/article/pii/S1364032120304639#bib61
FURFURAL		45.8	% molar yield based on Xylose	0.0607443			Rapid and simultaneous production of furfural and cellulose-rich residue from sugarcane bagasse using a pressurized phosphoric acid-acetone-water system - ScienceDirect	Aqueous system production, HUSY catalyst	https://www.sciencedirect.com/science/article/pii/S1364032120304639#bib61
FURFURAL		92	% of hemicellulose in Bagasse	0.504804			Exceptionally high yields of furfural from assorted raw biomass over solid acids - RSC Advances (RSC Publishing)	Organic system furfural production, GVL solvent, Al-beta zeolite catalyst	https://www.sciencedirect.com/science/article/pii/S0926669017300146
FURFURAL	sugarcane molasses	0	theoretical yield	0	0	0	50% theoretical yield	Biphasic system, H2O Acetone solvent, H3PO4 catalyst
FURFURAL	sugar beet	0.00778104	theoretical yield	0.00389052	0.00389052	0	50% theoretical yield	Biphasic system, H2O Toluene, SAPA-44 Catalyst
FURFURAL	sugar beet pulp	77 - 20	g furfural / 1kg dried SBP	0.0485	0.048575	7.5e-05	Comparison of pyrolysis and hydrolysis processes for furfural production from sugar beet pulp: A case study in southern Idaho, USA - ScienceDirect (wur.nl)
FURFURAL		5.49 -3.48	% furfural / SBP	0.04865			Energies | Free Full-Text | Potential of Waste Biomass from the Sugar Industry as a Source of Furfural and Its Derivatives for Use as Fuel Additives in Poland (mdpi.com)
FURFURAL	sugar beet molasses	0.00385416		0.00192708	0.00192708	0	50% theoretical yield	Pyrolizer
FURFURAL	rice grain	0	theoretical yield	0	0		50% theoretical yield	Acid Hydrolysis, 120C, 0.5% H2SO4 increased pressure
FURFURAL	rice hull	0.06	Furfural yield* of rice husk dry basis	0.052752	0.0767448	0.0210103	https://doi.org/10.1016/S0960-8524(98)00088-1
FURFURAL		0.9	of theoretical yield	0.085017			https://link.springer.com/article/10.1007/s11814-007-0101-z
FURFURAL		0.55	of the theoretical yield	0.0519548			https://link.springer.com/article/10.1007/s13399-020-00810-1
FURFURAL		8.9	Yield based on weight of raw material (%)	0.089			https://www.sciencedirect.com/science/article/pii/S0008621512002984?via=ihub#t0025
FURFURAL		10.5	Yield based on weight of raw material (%)	0.105			https://www.sciencedirect.com/science/article/pii/S0960852498000881
FURFURAL	rice bran	0.0490133	theoretical yield	0.0245066	0.0245066		50% theoretical yield
FURFURAL	apple	0.00021816	theoretical yield	0.00010908	0.00010908		50% theoretical yield
FURFURAL	apple pomace	0.0745453	theoretical yield	0.0372726	0.0372726		50% theoretical yield
FURFURAL	orange	0.0207252	theoretical yield	0.0103626	0.0103626		50% theoretical yield
FURFURAL	orange peel	0	theoretical yield	0	0		50% theoretical yield
FURFURAL	banana	0	theoretical yield	0	0		50% theoretical yield
FURFURAL	banana peel	0.172363	theoretical yield	0.0861815	0.0861815		50% theoretical yield
FURFURAL	potato pulp	0.00151786	theoretical yield	0.000758932	0.000758932		50% theoretical yield
FURFURAL	sweet potato	0.0020148	theoretical yield	0.0010074	0.0010074		50% theoretical yield
FURFURAL	sweet potato pulp	0.00290761	theoretical yield	0.00145381	0.00145381		50% theoretical yield
FURFURAL	barley	0.101618	theoretical yield	0.0508091	0.0508091		50% theoretical yield
FURFURAL	spent grains	0.071395	theoretical yield	0.0356975	0.0356975		50% theoretical yield
FURFURAL	rapeseed	0.0367963	theoretical yield	0.0183982	0.0183982		50% theoretical yield
FURFURAL	rapeseed meal	0.00886969	theoretical yield	0.00443485	0.00443485		50% theoretical yield
HMF	corn	30.9 - 10.5	% molar yield, based on cellulose in substrate	0.0108828	0.0566632	0.0798062	Corn stover valorization by one-step formic acid fractionation and formylation for 5-hydroxymethylfurfural and high guaiacyl lignin production - ScienceDirect
HMF		3.46	% wt yield	0.0346			From corn stover to 5-hydroxymethylfurfural by ball milling-microwave hydrothermal (BM-MHT) | Biomass Conversion and Biorefinery (wur.nl)
HMF		330 - 100	g HMF/ kg corn	0.215			Lignocellulosic biomass and carbohydrates as feed-stock for scalable production of 5-hydroxymethylfurfural | SpringerLink (wur.nl)	https://www.sciencedirect.com/science/article/pii/S0960852419318164
HMF	corn germ	0.116861	theoretical yield	0.0584306	0.0584306	0	50% theoretical yield	https://link.springer.com/article/10.1007/s13399-022-03648-x
HMF	corn pericarp	0.379789	theoretical yield	0.189894	0.189894	0	50% theoretical yield	https://link.springer.com/article/10.1007/s10570-021-03764-3
HMF	whole wheat	0.495437	theoretical	0.247718	0.247718	0	50% theoretical yield
HMF	wheat bran	0.243849	theoretical	0.121924	0.121924	0	50% theoretical yield
HMF	wheat germ	0.2926	theoretical	0.1463	0.1463	0	50% theoretical yield
HMF	potato	270-280	g HMF/ kg raw potato	0.275	0.275	0	Lignocellulosic biomass and carbohydrates as feed-stock for scalable production of 5-hydroxymethylfurfural | SpringerLink (wur.nl)
HMF	tomato	0.01204	theoretical	0.00602	0.00602	0	50% theoretical yield
HMF	tomato pomace	0.01169	theoretical	0.005845	0.005845	0	50% theoretical yield	https://link.springer.com/article/10.1007/s10570-021-03764-3
HMF	sugarcane	70.7	% yield, HMF / Sugarcane JUICE	0.707	0.707	0	Eco‐Friendly Production of 5‐Hydroxymethylfurfural from Sucrose Using Commercially Available Dihydric Phosphate as a Catalyst - Ma - 2018 - ChemistrySelect - Wiley Online Library (wur.nl)
HMF	sugarcane bagasse	10.05 - 3.79	% HMF per gram dry bagasse	0.0738875	0.125074	0.120719	A consolidated bioprocess design to produce multiple high-value platform chemicals from lignocellulosic biomass and its technoeconomic feasibility - ScienceDirect (wur.nl)
HMF		72	% molar yield	0.357039			High yield conversion of cellulosic biomass into 5-hydroxymethylfurfural and a study of the reaction kinetics of cellulose to HMF conversion in a biphasic system - Catalysis Science & Technology (RSC Publishing) (wur.nl)	MIBK
HMF		10	kg HMF / 1 ton Bagasse	0.01			Chemometric Approach to Quantify 5-Hydroxymethylfurfural and Furfural Obtained from Sugarcane Bagasse and Peanut Hull by UV | SpringerLink (wur.nl)
HMF		140 - 90	g HMF/ kg bagasse	0.115			Lignocellulosic biomass and carbohydrates as feed-stock for scalable production of 5-hydroxymethylfurfural | SpringerLink (wur.nl)
HMF		12.08 - 3.47	%wt	0.0694444			Scopus - Document details - Production of furan compounds from sugarcane bagasse using a catalytic system containing ZnCl<sub>2</sub>/HCl or AlCl<sub>3</sub>/HCl in a biphasic system | Signed in
HMF	sugarcane molasses	49.6 - 43.2	% theoretical of all sugars in molasses	0.181173	0.181173	0	Production of 5-(hydroxymethyl)-furfural from water-soluble carbohydrates and sugarcane molasses - ScienceDirect (wur.nl)
HMF	sugar beet	93.6-95.7	SHMF [mol %]	0.0537543	0.0429151	0.0108392	High‐Yield 5‐Hydroxymethylfurfural Synthesis from Crude Sugar Beet Juice in a Biphasic Microreactor - Abdilla‐Santes - 2019 - ChemSusChem - Wiley Online Library (wur.nl)
HMF		28.5 - 22.6	% c HMF /c mono sugar beet juice	0.032076			5-Hydroxy-2-Methylfurfural from Sugar Beet Thick Juice: Kinetic and Modeling Studies | ACS Sustainable Chemistry & Engineering	Lewis and Brønsted acids and the use of the THF/NaClaq biphasic system
HMF	sugar beet pulp	82.5 - 4.5	HMF g/ kg SBP	0.0501111	0.0501111	0	Energies | Free Full-Text | Sustainable Production of 5-Hydroxymethylfurfural from Pectin-Free Sugar Beet Pulp in a Simple Aqueous Phase System-Optimization with Doehlert Design (mdpi.com)
HMF	sugar beet molasses	0.389532	theoretical	0.194766	0.194766	0	50% theoretical yield
HMF	rice grain	17.3-35.2	yields (mol %)	0.203691	0.198168	0.0822232	https://pubs.acs.org/doi/10.1021/acssuschemeng.8b05141
HMF		18.6	yields (mol %)	0.107632			https://onlinelibrary.wiley.com/doi/10.1002/ente.202000597
HMF		18.1	yields ( wt%)	0.181			https://www.sciencedirect.com/science/article/pii/S0960852416311233?casa_token=4MKCRwh2jWMAAAAA:PYz3qUZ70Ua7bTGG4fC9Ru3BkctfZX8LzcZVXeU6ndRrygTWFdUvUDtM_LzgeLyrZNh3xFU#m0005
HMF		8.1-9.5	yields (mol %)	0.115961			https://www.sciencedirect.com/science/article/pii/S0960852416311233?casa_token=4MKCRwh2jWMAAAAA:PYz3qUZ70Ua7bTGG4fC9Ru3BkctfZX8LzcZVXeU6ndRrygTWFdUvUDtM_LzgeLyrZNh3xFU#m0005
HMF		22.6	yields (wt %)	0.226			https://onlinelibrary.wiley.com/doi/10.1002/ente.202000597
HMF		61.3	yields (mol %)	0.354723			https://chemistry-europe.onlinelibrary.wiley.com/doi/10.1002/cssc.202101889
HMF	rice hull	49-65	yields (mol %)	0.135075	0.135075	0	https://pubs.rsc.org/en/content/articlelanding/2016/cy/c6cy00820h
HMF	rice bran	0.138713	theoretical yield g/g	0.0693567	0.0693567		50% theoretical yield
HMF	apple	0.0976072	theoretical yield g/g	0.0488036	0.0488036		50% theoretical yield
HMF	apple pomace	37.3-44.5	HMF yield % holocellulose	0.0419225	0.0419225		https://link.springer.com/article/10.1007/s11696-023-03055-0
HMF	orange	0.0615337	theoretical yield g/g	0.0307668	0.0307668		50% theoretical yield
HMF	orange peel	0.110303	theoretical yield g/g	0.0551516	0.0551516		50% theoretical yield
HMF	banana	0.114594	theoretical yield g/g	0.0572968	0.0572968		50% theoretical yield
HMF	banana peel	42	Yield (%)	0.42	0.252213	0.167787	https://www.sciencedirect.com/science/article/pii/S1226086X14006996?via%3Dihub#tbl0015
HMF		22.7-71.9	Yield HMF (mol%)	0.0844268			https://www.sciencedirect.com/science/article/pii/S0960852422011129?via%3Dihub
HMF	potato pulp	0.0821212	theoretical yield g/g	0.0410606	0.0410606		50% theoretical yield
HMF	sweet potato	0.149602	theoretical yield g/g	0.0748011	0.0748011		50% theoretical yield
HMF	sweet potato pulp	0.142113	theoretical yield g/g	0.0710565	0.0710565		50% theoretical yield
HMF	barley	0.501839	theoretical yield g/g	0.250919	0.250919		50% theoretical yield
HMF	spent grains	0.208471	theoretical yield g/g	0.104235	0.104235		50% theoretical yield
HMF	rapeseed	0.0378	theoretical yield g/g	0.0189	0.0189		50% theoretical yield
HMF	rapeseed meal	0.108413	theoretical yield g/g	0.0542066	0.0542066		50% theoretical yield
FDCA	corn	105	t FDCA / 2000 t Corn Stover	0.0525	0.0525	0	Sustainable development of biorefineries: integrated assessment method for co-production pathways - Energy & Environmental Science (RSC Publishing)
FDCA	corn germ	0.144741	theoretical yield g/g	0.0723704	0.0723704		50% theoretical yield
FDCA	corn pericarp	0.470396	theoretical yield g/g	0.235198	0.235198		50% theoretical yield
FDCA	whole wheat	0.613634	theoretical yield g/g	0.306817	0.306817		50% theoretical yield
FDCA	wheat bran	0.302024	theoretical yield g/g	0.151012	0.151012		50% theoretical yield
FDCA	wheat germ	0.362406	theoretical yield g/g	0.181203	0.181203		50% theoretical yield
FDCA	potato	0.138635	theoretical yield g/g	0.0693174	0.0693174		50% theoretical yield
FDCA	tomato	0.0274839	theoretical yield g/g	0.0137419	0.0137419		50% theoretical yield
FDCA	tomato pomace	0.0682329	theoretical yield g/g	0.0341164	0.0341164		50% theoretical yield
FDCA	sugarcane	0.25065	theoretical yield g/g	0.125325	0.125325		50% theoretical yield
FDCA	sugarcane bagasse	0.614183	theoretical yield g/g	0.307091	0.307091		50% theoretical yield
FDCA	sugarcane molasses	0.482486	theoretical yield g/g	0.241243	0.241243		50% theoretical yield
FDCA	sugar beet	0.152216	theoretical yield g/g	0.076108	0.076108		50% theoretical yield
FDCA	sugar beet pulp	0.382751	theoretical yield g/g	0.191375	0.191375		50% theoretical yield
FDCA	sugar beet molasses	0.259796	theoretical yield g/g	0.129898	0.129898		50% theoretical yield
FDCA	rice grain	0.71672	theoretical yield g/g	0.35836	0.35836		50% theoretical yield
FDCA	rice hull	0.304183	theoretical yield g/g	0.152091	0.152091		50% theoretical yield
FDCA	rice bran	0.171806	theoretical yield g/g	0.0859032	0.0859032		50% theoretical yield
FDCA	apple	0.120893	theoretical yield g/g	0.0604467	0.0604467		50% theoretical yield
FDCA	apple pomace	0.495404	theoretical yield g/g	0.247702	0.247702		50% theoretical yield
FDCA	orange	0.0762139	theoretical yield g/g	0.0381069	0.0381069		50% theoretical yield
FDCA	orange peel	0.136619	theoretical yield g/g	0.0683093	0.0683093		50% theoretical yield
FDCA	banana	0.141932	theoretical yield g/g	0.0709662	0.0709662		50% theoretical yield
FDCA	banana peel	0.221075	theoretical yield g/g	0.110538	0.110538		50% theoretical yield
FDCA	potato pulp	0.101713	theoretical yield g/g	0.0508565	0.0508565		50% theoretical yield
FDCA	sweet potato	0.185293	theoretical yield g/g	0.0926465	0.0926465		50% theoretical yield
FDCA	sweet potato pulp	0.176017	theoretical yield g/g	0.0880085	0.0880085		50% theoretical yield
FDCA	barley	0.621563	theoretical yield g/g	0.310781	0.310781		50% theoretical yield
FDCA	spent grains	0.258206	theoretical yield g/g	0.129103	0.129103		50% theoretical yield
FDCA	rapeseed	0.046818	theoretical yield g/g	0.023409	0.023409		50% theoretical yield
FDCA	rapeseed meal	0.134277	theoretical yield g/g	0.0671387	0.0671387		50% theoretical yield
ISOPRENE	corn	0.040851	theoretical yield g/g	0.0204255	0.0204255		50% theoretical yield
ISOPRENE	corn germ	0.0283806	theoretical yield g/g	0.0141903	0.0141903		50% theoretical yield
ISOPRENE	corn pericarp	0.0922344	theoretical yield g/g	0.0461172	0.0461172		50% theoretical yield
ISOPRENE	whole wheat	0.12032	theoretical yield g/g	0.0601602	0.0601602		50% theoretical yield
ISOPRENE	wheat bran	0.0592204	theoretical yield g/g	0.0296102	0.0296102		50% theoretical yield
ISOPRENE	wheat germ	0.07106	theoretical yield g/g	0.03553	0.03553		50% theoretical yield
ISOPRENE	potato	0.02654	theoretical yield g/g	0.01327	0.01327		50% theoretical yield
ISOPRENE	tomato	0.002482	theoretical yield g/g	0.001241	0.001241		50% theoretical yield
ISOPRENE	tomato pomace	0.010557	theoretical yield g/g	0.0052785	0.0052785		50% theoretical yield
ISOPRENE	sugarcane	0.036805	theoretical yield g/g	0.0184025	0.0184025		50% theoretical yield
ISOPRENE	sugarcane bagasse	0.120428	theoretical yield g/g	0.060214	0.060214		50% theoretical yield
ISOPRENE	sugarcane molasses	0.046529	theoretical yield g/g	0.0232645	0.0232645		50% theoretical yield
ISOPRENE	sugar beet	0.0158378	theoretical yield g/g	0.00791888	0.00791888		50% theoretical yield
ISOPRENE	sugar beet pulp	0.0589905	theoretical yield g/g	0.0294952	0.0294952		50% theoretical yield
ISOPRENE	sugar beet molasses	0.035998	theoretical yield g/g	0.017999	0.017999		50% theoretical yield
ISOPRENE	rice grain	0.140533	theoretical yield g/g	0.0702667	0.0702667		50% theoretical yield
ISOPRENE	rice hull	0.0596437	theoretical yield g/g	0.0298218	0.0298218		50% theoretical yield
ISOPRENE	rice bran	0.0282075	theoretical yield g/g	0.0141037	0.0141037		50% theoretical yield
ISOPRENE	apple	0.00758055	theoretical yield g/g	0.00379027	0.00379027		50% theoretical yield
ISOPRENE	apple pomace	0.063852	theoretical yield g/g	0.031926	0.031926		50% theoretical yield
ISOPRENE	orange	0.00718295	theoretical yield g/g	0.00359147	0.00359147		50% theoretical yield
ISOPRENE	orange peel	0.0178978	theoretical yield g/g	0.00894892	0.00894892		50% theoretical yield
ISOPRENE	banana	0.0145609	theoretical yield g/g	0.00728047	0.00728047		50% theoretical yield
ISOPRENE	banana peel	0.0433481	theoretical yield g/g	0.0216741	0.0216741		50% theoretical yield
ISOPRENE	potato pulp	0.0199437	theoretical yield g/g	0.00997185	0.00997185		50% theoretical yield
ISOPRENE	sweet potato	0.0320131	theoretical yield g/g	0.0160065	0.0160065		50% theoretical yield
ISOPRENE	sweet potato pulp	0.0345131	theoretical yield g/g	0.0172566	0.0172566		50% theoretical yield
ISOPRENE	barley	0.0307368	theoretical yield g/g	0.0153684	0.0153684		50% theoretical yield
ISOPRENE	spent grains	0.0121578	theoretical yield g/g	0.00607888	0.00607888		50% theoretical yield
ISOPRENE	rapeseed	0.00240794	theoretical yield g/g	0.00120397	0.00120397		50% theoretical yield
ISOPRENE	rapeseed meal	0.0345131	theoretical yield g/g	0.0172566	0.0172566		50% theoretical yield
SUCCINIC ACID	corn	0.84 - 0.77	g succinic acid/ g total sugars in corn	0.701315	0.260433	0.247191	Succinic Acid Production from Corn Cob Hydrolysates by Genetically Engineered Corynebacterium glutamicum | SpringerLink (wur.nl)
SUCCINIC ACID		0.64	g succinic acid/ g total sugars in corn	0.557183			Comparison of hydrothermolysis and mild-alkaline pretreatment methods on enhancing succinic acid production from hydrolyzed corn fiber - ScienceDirect (wur.nl)
SUCCINIC ACID		0.39 - 0.06	g succinic acid/ g total sugars in corn	0.170833			Succinic acid production from corn stover by simultaneous saccharification and fermentation using Actinobacillus succinogenes - ScienceDirect (wur.nl)	Corn cob hydrolysates, oxygen deprivation, additionof sodium carbonate, Corynebacterium glutamicum
SUCCINIC ACID		0.31 - 0.09	g succinic acid/g biomass	0.175			Ionic liquid pretreatment to increase succinic acid production from lignocellulosic biomass - ScienceDirect (wur.nl)	Sodium hydroxide corn fiber hydrolysate supplemented only with yeast extract
SUCCINIC ACID		26 - 20	% Total sugar	0.200238			Enhanced succinic acid production from corncob hydrolysate by microbial electrolysis cells - ScienceDirect (wur.nl)	SSF Actinobacillus succinogenes
SUCCINIC ACID	corn germ	0.111376	theoretical yield g/g	0.0556879	0.0556879		50% theoretical yield	Corn stover, AmimCl- pretreated
SUCCINIC ACID	corn pericarp	0.465369	theoretical yield g/g	0.232685	0.232685		50% theoretical yield	Hyrolized corncob, NaOH and CaOH2 pretreatment, Actinobacillus Succinogens NJ113 MECs
SUCCINIC ACID	whole wheat	0.09 - 0.2	Yield g/g (estimated from figure)	0.145	0.369149	0.196671	Metabolic engineering of Aspergillus niger via ribonucleoprotein-based CRISPR–Cas9 system for succinic acid production from renewable biomass - ProQuest
SUCCINIC ACID		74.1	amount of succinic acid produced from 1 g sugar consumed, and was expressed as a percentage	0.554516			Fermentative production of succinic acid from straw hydrolysate by Actinobacillus succinogenes - ScienceDirect (wur.nl)
SUCCINIC ACID		0.81 - 0.6	Yield (g/g glucose)	0.464093			A wheat biorefining strategy based on solid-state fermentation for fermentative production of succinic acid - ScienceDirect (wur.nl)	Aspergillus niger via ribonucleoprotein-based CRISPR–Cas9 system
SUCCINIC ACID		0.1	Yield g/g (estimated from figure 4)	0.1			Succinic acid production from orange peel and wheat straw by batch fermentations of Fibrobacter succinogenes S85 | SpringerLink (wur.nl)
SUCCINIC ACID		0.7-1.02	g/g glucose equivalent	0.582138			https://www.sciencedirect.com/science/article/pii/S0168165609002533?via%3Dihub#tbl3
SUCCINIC ACID	wheat bran	0.27	grams acid formed/grams glucose utilized	0.094056	0.190289	0	https://link.springer.com/article/10.1007/s13213-012-0441-8	Wheat straw, F Succinogenes S85
SUCCINIC ACID		0.8225	g succinic acid/g glucose equivalent	0.286522			Cereal-based biorefinery development: Utilisation of wheat milling by-products for the production of succinic acid - ScienceDirect (wur.nl)
SUCCINIC ACID	wheat germ	0.334476	theoretical yield g/g	0.167238	0.167238		50% theoretical yield
SUCCINIC ACID	potato	0.76-0.84	YP is the yield of product with respect to the initial amount of substrate (S)	0.124894	0.124894	0	Succinic acid production by Actinobacillus succinogenes using acid and enzymatic hydrolysates of potato and beer wastes and repeated batch operation	SSF Aspergillus
SUCCINIC ACID	tomato	0.0218465	theoretical yield g/g	0.0109233	0.0109233		50% theoretical yield
SUCCINIC ACID	tomato pomace	0.0626016	theoretical yield g/g	0.0313008	0.0313008		50% theoretical yield	https://www.sciencedirect.com/science/article/pii/S0961953423003331?via%3Dihub#tbl6
SUCCINIC ACID	sugarcane	45.77-78.03	%, final succinic acid from one gram sugar consumed	0.196194	0.159865	0.0352468	Economical Succinic Acid Production from Sugarcane Juice by Actinobacillus succinogenes Supplemented with Corn Steep Liquor and Peanut Meal as Nitrogen Sources | SpringerLink (wur.nl)
SUCCINIC ACID		41.39	SA g/L	0.171257			Optimization of alkaline-assisted organosolv pretreatment of sugarcane trash for the production of succinic acid using response surface methodology - ScienceDirect (wur.nl)
SUCCINIC ACID		0.5-0.63	g succinic acid/ g glucose equivalent in Sugrcane juice	0.112143			An end-to-end pipeline for succinic acid production at an industrially relevant scale using Issatchenkia orientalis	https://link.springer.com/article/10.1007/s12355-015-0401-2
SUCCINIC ACID	sugarcane bagasse	9.2-84.5	%, final succinic acid from one gram sugar consumed	0.415514	0.493761	0.19278	Ultrasonic pretreatment and acid hydrolysis of sugarcane bagasse for succinic acid production using Actinobacillus succinogenes | Bioprocess and Biosystems Engineering (wur.nl)	https://www.sciencedirect.com/science/article/pii/S1878818122001013?casa_token=lcsD2luuiMoAAAAA:vlJMbzQYVmhyG1HUNkeo1C9N4gNYO4MbU_P2YawXe8_OKkZukWqS8vICy9SNTzMjSgHqZwk#sec3
SUCCINIC ACID		0.35-0.43	%, final succinic acid (g) from one gram xylose consumed	0.0487896			Succinic acid production from sugarcane bagasse hemicellulose hydrolysate by Actinobacillus succinogenes | Journal of Industrial Microbiology & Biotechnology (wur.nl)	https://www.nature.com/articles/s41467-023-41616-9#Tab1
SUCCINIC ACID		0.81	g succinic acid / g total sugar	0.626286			Characterization of a β-glucosidase from Paenibacillus species and its application for succinic acid production from sugarcane bagasse hydrolysate - ScienceDirect (wur.nl)	https://www.scopus.com/results/results.uri?sort=r-f&src=s&st1=%28%22potato%22+OR+%22whole+potato%22%29+AND+%28%22levulinic+acid+production%22%29&sid=929323648778dd3fbe85ba53d6a23433&sot=b&sdt=b&sl=77&s=TITLE-ABS-KEY%28%28%22bagasse%22%29+AND+%28%22succinic+acid+production%22%29%29&origin=searchbasic&editSaveSearch=&yearFrom=Before+1960&yearTo=Present&sessionSearchId=929323648778dd3fbe85ba53d6a234…
SUCCINIC ACID		0.46-0.66	g succinic acid / g total sugar	0.432988			Efficient succinic acid production from lignocellulosic biomass by simultaneous utilization of glucose and xylose in engineered Escherichia coli - ScienceDirect (wur.nl)	https://academic.oup.com/jimb/article/38/8/1001/5994396	abnormal value
SUCCINIC ACID		64.7	% g/g tot sugars	0.500256			Succinic acid production from cellobiose by Actinobacillus succinogenes	https://www.sciencedirect.com/science/article/pii/S096085241730809X?casa_token=bLKGiNWU0BMAAAAA:QJa_ZpGXFvDGvSth9KHLNquMjPW-13VIhm8DOvEqyi5bopp3JkRAuEhkD1-1U4riEtP3Lwg
SUCCINIC ACID	sugarcane molasses	0.34-0.96	g SUCCINATE / g sugar consumed in molasses	0.387677	0.412718	0.0250413	Production of succinic acid from sucrose and sugarcane molasses by metabolically engineered Escherichia coli - ScienceDirect (wur.nl)	https://www.sciencedirect.com/science/article/pii/S0960852413014831?casa_token=P13LkwXWp-YAAAAA:XkFECrqCkYh4WfnPql-Xa_X8BUrJCgMOcgm-QUWn-npMdfX2RN596xT1q98FyPeRAxQXWBo
SUCCINIC ACID		1.2	mol succinic acid/ mol hexose	0.437759			Succinic acid production from sucrose and molasses by metabolically engineered E. coli using a cell surface display system - ScienceDirect (wur.nl)	https://www.sciencedirect.com/science/article/pii/S0960852412015210?casa_token=4jsm4Bw_dosAAAAA:0wNVsgfeB2TW7rtOZmGULsRXcl6b1jDKk-7ooQu9UQfCp1j6_4hlLcVXko-qUFyfKjdZdWE#t0015
SUCCINIC ACID	sugar beet	0.117202	theoretical yield g/g	0.0586009	0.0586009		50% theoretical yield	https://www.sciencedirect.com/science/article/pii/S0960852411013848?casa_token=24Py_gt2_bgAAAAA:SYA1hM30BO6HFD-bCHt6kBOJcmCiXB0lI5eUU4KDzcg1ROG2d1U-ErPZX4BLZIHBnfMMOh4
SUCCINIC ACID	sugar beet pulp	0.62-0.8	SA yield (g/g)	0.335074	0.335074	0	Restructuring the Conventional Sugar Beet Industry into a Novel Biorefinery: Fractionation and Bioconversion of Sugar Beet Pulp into Succinic Acid and Value-Added Coproducts | ACS Sustainable Chemistry & Engineering (wur.nl)	https://www.sciencedirect.com/science/article/pii/S1369703X14002319?casa_token=B_222GSyp9IAAAAA:ZGvgnWAdT6ozgL0TOD2O1_hCpjJlhbd0dVQdmjJVq9XWRRbwwkNEDLFlyZNgLZKzZNU1Yqk#tbl0020
SUCCINIC ACID	sugar beet molasses	0.17-0.18	g/ g glucose in Molasses	0.0370568	0.0370568	0	Metabolic engineering of Aspergillus niger via ribonucleoprotein-based CRISPR–Cas9 system for succinic acid production from renewable biomass | Biotechnology for Biofuels and Bioproducts | Full Text (biomedcentral.com)
SUCCINIC ACID	rice grain	0.551505	theoretical yield g/g	0.275752	0.275752		50% theoretical yield	SBP Hydrolysate, A. succinogens	https://pubs.acs.org/doi/10.1021/acssuschemeng.8b04874?src=getftr				https://www.researchgate.net/figure/Total-solids-and-volatile-solids-of-sugar-beet-pulp-in-air-dried-sample_tbl1_366888237
SUCCINIC ACID	rice hull	0.125	yield g SA/g rice husk	0.125	0.125		https://www.sciencedirect.com/science/article/pii/S2352554115300073?via%3Dihub	at 35C, A. Niger	https://link.springer.com/article/10.1186/s13068-020-01850-5
SUCCINIC ACID	rice bran	0.177201	theoretical yield g/g	0.0886003	0.0886003		50% theoretical yield
SUCCINIC ACID	apple	0.0931952	theoretical yield g/g	0.0465976	0.0465976		50% theoretical yield
SUCCINIC ACID	apple pomace	0.449594	theoretical yield g/g	0.224797	0.224797		50% theoretical yield
SUCCINIC ACID	orange	0.0776589	theoretical yield g/g	0.0388295	0.0388295		50% theoretical yield
SUCCINIC ACID	orange peel	0.122	Yield on orange peel g/g	0.122	0.122217	0.0171491	https://link.springer.com/article/10.1007/s00253-010-2726-9
SUCCINIC ACID		4.48	SA production g/L	0.1502			https://arccjournals.com/journal/indian-journal-of-agricultural-research/AF-764
SUCCINIC ACID		0.62-0.73	Yield (gsa gtsc−1)	0.106364			https://www.sciencedirect.com/science/article/pii/S0956053X20303305#t0010
SUCCINIC ACID		0.7	Yield (gsa gtsc−1)	0.110303			https://www.sciencedirect.com/science/article/pii/S0959652617317560
SUCCINIC ACID	banana	0.109215	theoretical yield g/g	0.0546074	0.0546074		50% theoretical yield
SUCCINIC ACID	banana peel	0.328242	theoretical yield g/g	0.164121	0.164121		50% theoretical yield
SUCCINIC ACID	potato pulp	0.079659	theoretical yield g/g	0.0398295	0.0398295		50% theoretical yield
SUCCINIC ACID	sweet potato	0.144428	theoretical yield g/g	0.0722142	0.0722142		50% theoretical yield
SUCCINIC ACID	sweet potato pulp	0.13811	theoretical yield g/g	0.0690549	0.0690549		50% theoretical yield
SUCCINIC ACID	barley	0.571509	theoretical yield g/g	0.285754	0.285754		50% theoretical yield
SUCCINIC ACID	spent grains	0.111462	theoretical yield g/g	0.0557308	0.0557308		50% theoretical yield
SUCCINIC ACID	rapeseed meal	0.12	(w/w)	0.124	0.124		Simultaneous saccharification and fermentation of acid-pretreated rapeseed meal for succinic acid production using Actinobacillus succinogenes - ScienceDirect (uu.nl)
SUCCINIC ACID	rapeseed	0.0697831	theoretical yield g/g	0.0348916	0.0348916		50% theoretical yield
SUCCINIC ACID	rapeseed meal	12.4	g/100 g dry matter	0.111641	0.111641		Simultaneous saccharification and fermentation of acid-pretreated rapeseed meal for succinic acid production using Actinobacillus succinogenes	https://doi.org/10.1016/j.enzmictec.2010.12.009
3HP	corn	0.09-0.48	mol 3HP / mol sugars	0.119143	0.119143	0	Metabolic engineering to improve production of 3-hydroxypropionic acid from corn-stover hydrolysate in Aspergillus species – DOAJ
3HP	corn germ	0.116861	theoretical yield g/g	0.0584306	0.0584306		50% theoretical yield
3HP	corn pericarp	0.379789	theoretical yield g/g	0.189894	0.189894		50% theoretical yield	DDR-EH-150, A. Niger
3HP	whole wheat	0.167387	theoretical yield g/g	0.0836934	0.0836934		50% theoretical yield
3HP	wheat bran	0.0823861	theoretical yield g/g	0.041193	0.041193		50% theoretical yield
3HP	wheat germ	0.098857	theoretical yield g/g	0.0494285	0.0494285		50% theoretical yield
3HP	potato	0.0369218	theoretical yield g/g	0.0184609	0.0184609		50% theoretical yield
3HP	tomato	0.0034699	theoretical yield g/g	0.00173495	0.00173495		50% theoretical yield
3HP	tomato pomace	0.0146847	theoretical yield g/g	0.00734234	0.00734234		50% theoretical yield
3HP	sugarcane	0.0469413	theoretical yield g/g	0.0234706	0.0234706		50% theoretical yield
3HP	sugarcane bagasse	0.153274	theoretical yield g/g	0.0766368	0.0766368		50% theoretical yield
3HP	sugarcane molasses	0.0647388	theoretical yield g/g	0.0323694	0.0323694		50% theoretical yield
3HP	sugar beet	0.0415477	theoretical yield g/g	0.0207738	0.0207738		50% theoretical yield
3HP	sugar beet pulp	0.106727	theoretical yield g/g	0.0533637	0.0533637		50% theoretical yield
3HP	sugar beet molasses	0.072131	theoretical yield g/g	0.0360655	0.0360655		50% theoretical yield
3HP	rice grain	0.195507	theoretical yield g/g	0.0977533	0.0977533		50% theoretical yield
3HP	rice hull	0.0829749	yield g SA/g rice husk	0.125	0.125		50% theoretical yield
3HP	rice bran	0.0392416	theoretical yield g/g	0.0196208	0.0196208		50% theoretical yield
3HP	apple	0.0105459	theoretical yield g/g	0.00527294	0.00527294		50% theoretical yield
3HP	apple pomace	0.0888294	theoretical yield g/g	0.0444147	0.0444147		50% theoretical yield
3HP	orange	0.00999275	theoretical yield g/g	0.00499637	0.00499637		50% theoretical yield
3HP	orange peel	0.0248991	Yield on orange peel g/g	0.122	0.122		50% theoretical yield
3HP	banana	0.0202568	theoretical yield g/g	0.0101284	0.0101284		50% theoretical yield
3HP	banana peel	0.0603049	theoretical yield g/g	0.0301524	0.0301524		50% theoretical yield
3HP	potato pulp	0.0277452	theoretical yield g/g	0.0138726	0.0138726		50% theoretical yield
3HP	sweet potato	0.0445358	theoretical yield g/g	0.0222679	0.0222679		50% theoretical yield
3HP	sweet potato pulp	0.0480139	theoretical yield g/g	0.0240069	0.0240069		50% theoretical yield
3HP	barley	0.168256	theoretical yield g/g	0.0841282	0.0841282		50% theoretical yield
3HP	spent grains	0.0694575	theoretical yield g/g	0.0347288	0.0347288		50% theoretical yield
3HP	rapeseed	0.012771	theoretical yield g/g	0.0063855	0.0063855		50% theoretical yield
3HP	rapeseed meal	0.0366281	theoretical yield g/g	0.0183141	0.0183141		50% theoretical yield
LEVULINIC ACID	corn	33.63-45.45	yield%, amount LA/theoretical max from glucan (0.716x)	0.230433	0.241956	0.102968	Kinetic study of levulinic acid production from corn stalk at relatively high temperature using FeCl3 as catalyst: A simplified model evaluated - ScienceDirect (wur.nl)
LEVULINIC ACID		0.63-19.9	% wt	0.026173			Development of bioprocess for corncob-derived levulinic acid production - ScienceDirect (wur.nl)
LEVULINIC ACID		22.86-63.63	mol% LA/fructose	0.255445			High concentration levulinic acid production from corn stover - RSC Advances (RSC Publishing) (wur.nl)	230 °C, 10 min and 0.5 mol/L FeCl3.	https://www.sciencedirect.com/science/article/pii/S092666901530282X?via%3Dihub
LEVULINIC ACID		4.4-69.1	% LA*0.9/ from glucan in corn cobs	0.290529			Kinetics study of levulinic acid production from corncobs by tin tetrachloride as catalyst - ScienceDirect (wur.nl)	80 ℃, 10 % corncob, 1.0 M sulfuric acid and 30 min.	https://www.sciencedirect.com/science/article/pii/S0960852423000548?via%3Dihu	abnormal value
LEVULINIC ACID		9.24-47.1	mol % LA/glucan	0.191417			Kinetic study of levulinic acid production from corn stalk at mild temperature using FeCl3 as catalyst	SIRE and BE hydrolysate from corn stover	https://pubs.rsc.org/en/content/articlelanding/2016/ra/c6ra23768a
LEVULINIC ACID	corn germ	0.0869836	theoretical yield g/g	0.0434918	0.0434918		50% theoretical yield	193 °C, 17 min with 82 mM SnCl4 catalyzed hydrolysis of corn cobs	https://www.sciencedirect.com/science/article/pii/S0960852418304243?via%3Dihub
LEVULINIC ACID	corn pericarp	0.28269	theoretical yield g/g	0.141345	0.141345		50% theoretical yield	https://www.sciencedirect.com/science/article/pii/S0016236116308754?via%3Dihub#t0015
LEVULINIC ACID	whole wheat	19.9	%, g LA/ g wheat STRAW	0.199	0.202167	0.00316667	Levulinic acid production from wheat straw - ScienceDirect (wur.nl)
LEVULINIC ACID		19.3-21.7	yield (wt%)	0.205333			LEVULINIC ACID PRODUCTION FROM WASTE BIOMASS | Raspolli Galletti | BioResources (ncsu.edu)
LEVULINIC ACID	wheat bran	0.181505	theoretical yield g/g	0.0907524	0.0907524		50% theoretical yield	209.3 °C, 3.5% acid concentration, 15.6 liquid:solid ratio and 37.6 min of reaction time
LEVULINIC ACID	wheat germ	0.217792	theoretical yield g/g	0.108896	0.108896		50% theoretical yield	https://www.researchgate.net/publication/258993284_Levulinic_Acid_Production_from_waste_biomass
LEVULINIC ACID	potato	0.0833141	theoretical yield g/g	0.0416571	0.0416571		50% theoretical yield
LEVULINIC ACID	tomato	0.0165848	theoretical yield g/g	0.00829239	0.00829239		50% theoretical yield
LEVULINIC ACID	tomato pomace	0.041027	theoretical yield g/g	0.0205135	0.0205135		50% theoretical yield
LEVULINIC ACID	sugarcane	0.141246	theoretical yield g/g	0.0706231	0.0706231		50% theoretical yield
LEVULINIC ACID	sugarcane bagasse	19.4	% wt biomass SCB	0.194	0.238144	0.0720359	A kinetic study of acid catalysed hydrolysis of sugarcane bagasse to levulinic acid - ScienceDirect (wur.nl)
LEVULINIC ACID		36.5	% wt biomass SCB	0.365			Levulinic acid production from Cicer arietinum, cotton, Pinus radiata and sugarcane bagasse - RSC Advances (RSC Publishing) (wur.nl)	Heterogeneous Catalyst1g cellulose: 0.8430 g catalyst: 8 mL H2O
LEVULINIC ACID		54.6	LA yield wt%	0.151023			Optimization of Levulinic Acid Production from Depithed Sugarcane Bagasse in 1- Ethyl-3-methylimidazolium hydrogen sulfate [EMim][HSO4] | Waste and Biomass Valorization (wur.nl)	Hydrothermal reactor, 150 °C, 6 h, stainless steel floor stand reactor, H2SO4 (0.55 M)	https://www.sciencedirect.com/science/article/pii/S1385894712015884
LEVULINIC ACID		22.8	% wt biomass SCB	0.228			Production of Levulinic Acid from Bagasse and Paddy Straw by Liquefaction in the Presence of Hydrochloride Acid - Yan - 2008 - CLEAN – Soil, Air, Water - Wiley Online Library (wur.nl)	https://pubs.rsc.org/en/content/articlehtml/2014/ra/c4ra06246a
LEVULINIC ACID		60.5	%mol	0.252699			Kinetic insights into the lignocellulosic biomass-based levulinic acid production by a mechanistic model | Cellulose (wur.nl)	1-ethyl-3-methylimidazolium hydrogen sulfate [EMim][HSO4] ionic liquid (IL) were investigated.	https://link.springer.com/article/10.1007/s12649-020-01221-z
LEVULINIC ACID	sugarcane molasses	18.1-36.5	% wt Molasses	0.27925	0.27925	0	Concentrated Levulinic Acid Production from sugarcane Molasses | Energy & Fuels (wur.nl)
LEVULINIC ACID	sugar beet	0.0914759	theoretical yield g/g	0.0457379	0.0457379		50% theoretical yield	https://link.springer.com/article/10.1007/s10570-020-03183-w
LEVULINIC ACID	sugar beet pulp	0.230018	theoretical yield g/g	0.115009	0.115009		50% theoretical yield	https://pubs.acs.org/doi/full/10.1021/acs.energyfuels.7b03987
LEVULINIC ACID	sugar beet molasses	0-87.4	%mol., LA/sucrose	0.0221401	0.0221401	0	Maintenance of a Highly Active Solid Acid Catalyst in Sugar Beet Molasses for Levulinic Acid Production | Sugar Tech (springer.com)
LEVULINIC ACID	rice grain	0.430721	theoretical yield g/g	0.21536	0.21536		50% theoretical yield
LEVULINIC ACID	rice hull	0.118	LA/ dry rice husk (g/g)	0.10561	0.106718		https://www.sciencedirect.com/science/article/pii/S1359511317315532?via%3Dihub	acidified working molasses solution (pH 1.65) at 140 °C for 3 h.
LEVULINIC ACID		14.02-39.75	yield (wt %)	0.0574768			https://www.mdpi.com/2073-4344/10/3/327
LEVULINIC ACID		62.3-66.05	Yield (% mol)	0.146362			https://www.sciencedirect.com/science/article/pii/S2214785323006041?via%3Dihub#s0010
LEVULINIC ACID		28.8-65.2	LA yield from ISRRH (mol% )	0.117421			https://link.springer.com/article/10.1007/s10570-020-03183-w
LEVULINIC ACID	rice bran	0.103249	theoretical yield g/g	0.0516245	0.0516245		50% theoretical yield
LEVULINIC ACID	apple	0.0726523	theoretical yield g/g	0.0363261	0.0363261		50% theoretical yield
LEVULINIC ACID	apple pomace	0.297718	theoretical yield g/g	0.148859	0.148859		50% theoretical yield
LEVULINIC ACID	orange	0.0458016	theoretical yield g/g	0.0229008	0.0229008		50% theoretical yield
LEVULINIC ACID	orange peel	46.93	kg LA/ 1 ton fresh OPW	0.04694	0.0382125		https://onlinelibrary.wiley.com/doi/full/10.1002/bbb.2498
LEVULINIC ACID		86.7	LA yield (wt%)	0.0294849			https://analyticalsciencejournals.onlinelibrary.wiley.com/doi/epdf/10.1002/jctb.6484
LEVULINIC ACID	banana	0.0852959	theoretical yield g/g	0.0426479	0.0426479		50% theoretical yield
LEVULINIC ACID	banana peel	0.132858	theoretical yield g/g	0.0664289	0.0664289		50% theoretical yield
LEVULINIC ACID	potato pulp	0.0611255	theoretical yield g/g	0.0305628	0.0305628		50% theoretical yield
LEVULINIC ACID	sweet potato	0.111354	theoretical yield g/g	0.0556769	0.0556769		50% theoretical yield
LEVULINIC ACID	sweet potato pulp	0.105779	theoretical yield g/g	0.0528897	0.0528897		50% theoretical yield
LEVULINIC ACID	barley	0.373535	theoretical yield g/g	0.186768	0.186768		50% theoretical yield
LEVULINIC ACID	spent grains	0.155172	theoretical yield g/g	0.0775859	0.0775859		50% theoretical yield
LEVULINIC ACID	rapeseed	0.0281358	theoretical yield g/g	0.0140679	0.0140679		50% theoretical yield
LEVULINIC ACID	rapeseed meal	0.0806955	theoretical yield g/g	0.0403478	0.0403478		50% theoretical yield
LACTIC ACID	corn	0.54-0.7	yield on substrate (g/g)	0.605	0.644131	0.0160072	Lactic acid production from corn stover using mixed cultures of Lactobacillus rhamnosus and Lactobacillus brevis
LACTIC ACID		0.396-0.78	g LA/g corn stover	0.640857			Bioconversion of Corn Crop Residues: Lactic Acid Production through Simultaneous Saccharification and Fermentation
LACTIC ACID		0.54-0.77	g LA/g corn cob	0.636667			Bioconversion of Corn Crop Residues: Lactic Acid Production through Simultaneous Saccharification and Fermentation	https://linkinghub.elsevier.com/retrieve/pii/S0960852410015762
LACTIC ACID		694	g acid per kg of mashed corn	0.694			Lactic acid production from corn stover using mixed cultures of Lactobacillus rhamnosus and Lactobacillus brevis	https://www.mdpi.com/2071-1050/14/19/11799	REF number, table 1 to see pretreatment
LACTIC ACID	corn germ	0.126878	theoretical yield g/g	0.0634389	0.0634389		50% theoretical yield	https://www.mdpi.com/2071-1050/14/19/11800	REF number, table 1 to see pretreatment
LACTIC ACID	corn pericarp	0.530142	theoretical yield g/g	0.265071	0.265071		50% theoretical yield	https://linkinghub.elsevier.com/retrieve/pii/S0960852410015762
LACTIC ACID	whole wheat	0.51-0.9	of the theoretical maximum yield	0.530778	0.462336	0.115746	https://www.sciencedirect.com/science/article/pii/S0960852401001353
LACTIC ACID		0.33-1.01	mol LA/ mol glucose	0.261874			Kinetic modeling of hydrogen and L-lactic acid production by Thermotoga neapolitana via capnophilic lactic fermentation of starch - ScienceDirect (wur.nl)
LACTIC ACID		72.36%-76.44%	yield (g/g glucose)	0.526879			(PDF) Evolutionary Adaptation of Bacillus subtilis OCS SH-2 in Wheat Straw Hydrolysate for Bioethanol and Lactic Acid Production (researchgate.net)		Research from 2000, so old asf
LACTIC ACID		0.55-0.91	g LA/ g raw material	0.529814			An economic evaluation of the fermentative production of lactic acid from wheat flour
LACTIC ACID	wheat bran	0.18	g LA/g bran	0.18	0.302784	0.102251	(PDF) Wheat bran an inexpensive substrate for production of Lactic acid in solid state fermentation by Lactobacillus amylophilus GV6 - Optimization of fermentation conditions (researchgate.net)	https://pu.edu.pk/images/journal/zology/PDF-FILES/7_36_1_21.pdf
LACTIC ACID		0.85-0.95	g LA/g glucose consumed	0.301908			Fermentative production of l-lactic acid from hydrolysate of wheat bran by Lactobacillus rhamnosus - ScienceDirect (wur.nl)	https://www.sciencedirect.com/science/article/pii/S0960852400000572?via%3Dihub
LACTIC ACID		36	g LA/ 100 g wheat bran	0.36			Direct fermentation of starch to L(+) lactic acid in SSF by Lactobacillus amylophilus GV6 using wheat bran as support and substrate: Medium optimization using RSM
LACTIC ACID		46.3	g LA/ 100 g wheat bran	0.463			Single step fermentation of starch to l(+) lactic acid by Lactobacillus amylophilus GV6 in SSF using inexpensive nitrogen sources to replace peptone and yeast extract – Optimization by RSM - ScienceDirect (wur.nl)	https://www.sciencedirect.com/science/article/pii/S1369703X09003118#tbl3
LACTIC ACID		0.6	yield g/g glucose	0.209013			https://www.sciencedirect.com/science/article/pii/S1369703X04000920?via%3Dihub#TBL1	https://www.sciencedirect.com/science/article/pii/S0032959204000834
LACTIC ACID	wheat germ	0.31768	theoretical yield g/g	0.15884	0.15884		50% theoretical yield	https://www.sciencedirect.com/science/article/pii/S1359511305003181#tbl3
LACTIC ACID	potato	0.12	g LA/g leftover bits and pieces of potato starch	0.12	0.115376	0.0241496	Optically pure L-lactic acid production directly from leftover bits and pieces of potato starch using an amylolytic pellet-form complex Rhizopus oryzae ASC081	Effect of different carbon sources on l(+) -lactic acid production by Rhizopus oryzae
LACTIC ACID		0.88 ± 0.39	Yield (potato starch) ( mol lactic acid/mol glucose eq.)	0.0686917			Kinetic modeling of hydrogen and L-lactic acid production by Thermotoga neapolitana via capnophilic lactic fermentation of starch
LACTIC ACID		88	g/L LA from potato waste eq to 100g/L glucose	0.137383			Enhancement of l(+)-lactic acid production using acid-adapted precultures of Rhizopus arrhizus in a bubble column reactor	http://jase.tku.edu.tw/articles/jase-201306-16-2-12
LACTIC ACID		0.87-0.97	g LA/g Starch in potato starch	0.129265			Direct fermentation of potato starch wastewater to lactic acid by Rhizopus oryzae and Rhizopus arrhizus	https://www.sciencedirect.com/science/article/pii/S0960852421004661?via%3Dihub
LACTIC ACID		103.8	g/L lactic acid	0.121538			Effects of cultivation parameters on the morphology of Rhizopus arrhizus and the lactic acid production in a bubble column reactor	https://www.sciencedirect.com/science/article/pii/S138917230900200X?via%3Dihub
LACTIC ACID	tomato	0.0852959	theoretical yield g/g	0.0426479	0.0426479		50% theoretical yield	https://link.springer.com/article/10.1007/s00449-005-0398-0
LACTIC ACID	tomato pomace	27	% c LA/c tot carbohydrates in TP	0.0212603	0.0144712	0.00678905	Fermentation as a Strategy for Bio-Transforming Waste into Resources: Lactic Acid Production from Agri-Food Residues	https://analyticalsciencejournals.onlinelibrary.wiley.com/doi/10.1002/elsc.200700002
LACTIC ACID		0.19-1.69	% g LA/ g TS in TP	0.00768215			Lactic Acid production from Tomato Pomace Fermentable Sugars using Innovative Biological Treatments
LACTIC ACID	sugarcane	92.98-96	% c LA/c total sugars	0.292137	0.264029	0.0820187	Fermentative lactic acid production from a renewable carbon source under response surface optimized conditions without alkali addition: a membrane-based green approach	https://mdpi.com/2311-5637/7/1/3
LACTIC ACID		0.83	g LA/g sucrose	0.105825			Kinetic of lactic acid production from sugarcane juice using Lactobacillus plantarum NCIM 2912 - Sikder - 2014 - Asia-Pacific Journal of Chemical Engineering - Wiley Online Library (wur.nl)	https://www.aidic.it/cet/18/65/100.pdf
LACTIC ACID		90-96	% c LA/c tot sugars	0.286832			Lactic acid production from sugar-cane juice by a newly isolated Lactobacillus sp. | SpringerLink (wur.nl)	https://link.springer.com/article/10.1007/s10098-011-0448-z
LACTIC ACID		0.92-0.96	g LA/g tot sugars	0.289917			Modelling and simulation of continuous L (+) lactic acid production from sugarcane juice in membrane integrated hybrid-reactor system - ScienceDirect (wur.nl)	https://onlinelibrary.wiley.com/doi/full/10.1002/apj.1806
LACTIC ACID		1.12	g LA/g sugars consumed, sugarcane waste	0.345433			Lactic acid production from sugarcane field residue as renewable and economical bioresource by newly isolated Pediococcus pentosaceus HLV1 | SpringerLink (wur.nl)
LACTIC ACID	sugarcane bagasse	0.26	gLA/g sugar utilized	0.20103	0.459327	0.230057	Acid hydrolysis of sugarcane bagasse for lactic acid production - ScienceDirect (wur.nl)
LACTIC ACID		0.58	g LA/g dry bagasse	0.5278			Enhanced cellulosic d-lactic acid production from sugarcane bagasse by pre-fermentation of water-soluble carbohydrates before acid pretreatment - ScienceDirect (wur.nl)	https://link.springer.com/article/10.1007/s13399-022-03267-6
LACTIC ACID		0.87	g LA/g total sugars in bagasse	0.672678			Polymer grade l-lactic acid production from sugarcane bagasse hemicellulosic hydrolysate using Bacillus coagulans - ScienceDirect (wur.nl)	https://www.sciencedirect.com/science/article/pii/S0960852409011584
LACTIC ACID		8.78-26.16	g LA/g sugarcane bagasse	0.17606			Assessment of multiple pretreatment strategies for 2G L-lactic acid production from sugarcane bagasse | SpringerLink (wur.nl)	https://www.sciencedirect.com/science/article/pii/S0960852422016571
LACTIC ACID		0.93	g LA/g glucose and xylose	0.719069			Lactic acid production from sugarcane bagasse hydrolysates by Lactobacillus pentosus: Integrating xylose and glucose fermentation - Wischral - 2019 - Biotechnology Progress - Wiley Online Library (wur.nl)	https://www.sciencedirect.com/science/article/pii/S2589014X1930026X
LACTIC ACID	sugarcane molasses	95	%, w/w LA/tot sugar	0.52865	0.492034	0.0427035	Different Strategies To Improve Lactic Acid Productivity Based on Microorganism Physiology and Optimum Operating Conditions | Industrial & Engineering Chemistry Research (wur.nl)		https://link.springer.com/article/10.1007/s13399-020-01163-5
LACTIC ACID		78.3	%, w/w LA/tot sugar	0.435719			Optimization of lactic acid production from cheap raw material: Sugarcane molasses	https://aiche.onlinelibrary.wiley.com/doi/full/10.1002/btpr.2718
LACTIC ACID		0.898	g LA/ g tot sugars	0.499713			Optimization of lactic acid production by Lactobacillus plantarum strain Hui1 in a medium containing sugarcane molasses - ProQuest	https://pubs.acs.org/doi/full/10.1021/acs.iecr.8b01655
LACTIC ACID		0.98	g LA/g sugars	0.545344			Improvement and Metabolomics-Based Analysis of d-Lactic Acid Production from Agro-Industrial Wastes by Lactobacillus delbrueckii Submitted to Adaptive Laboratory Evolution | Journal of Agricultural and Food Chemistry (wur.nl)	https://pakbs.org/pjbot/PDFs/44(1)/49.pdf
LACTIC ACID		0.81	g/g hexose	0.450744			Efficient production of lactic acid from sugarcane molasses by a newly microbial consortium CEE-DL15 - ScienceDirect (wur.nl)	https://www.redalyc.org/journal/1803/180376043012/html/
LACTIC ACID	sugar beet	0.0708041	theoretical yield g/g	0.0354021	0.0354021		50% theoretical yield	https://pubs.acs.org/doi/full/10.1021/acs.jafc.0c00259
LACTIC ACID	sugar beet pulp	0.09-0.17	g LA/g exhausted sbp	0.100971	0.125242	0.0172878	Feasibility of exhausted sugar beet pulp as raw material for lactic acid production - Díaz - 2020 - Journal of the Science of Food and Agriculture - Wiley Online Library (wur.nl)	https://www.sciencedirect.com/science/article/pii/S1359511318316404
LACTIC ACID		0.582-0.922	Y (lactic acid/glucose) (mol mol−1)	0.139929			Valorisation of fungal hydrolysates of exhausted sugar beet pulp for lactic acid production
LACTIC ACID		50(370.85)	max plant capacity (min feedstock requirements) kt/year	0.134825			https://www.sciencedirect.com/science/article/pii/S0048969721056722#t0005	https://onlinelibrary.wiley.com/doi/10.1002/jsfa.10334
LACTIC ACID	sugar beet molasses	0.85- 0.91	g LA/g tot sugars	0.270428	0.204857	0.0577669	Lactic acid production on a combined distillery stillage and sugar beet molasses substrate - Mladenović - 2016 - Journal of Chemical Technology & Biotechnology - Wiley Online Library (wur.nl)	https://onlinelibrary.wiley.com/doi/10.1002/jsfa.11046
LACTIC ACID		0.978539	g LA/g sucrose	0.135975			Optimization of lactic acid production from beet molasses by Lactobacillus delbrueckii NCIMB 8130 - ProQuest	Techno-economic risk assessment, life cycle analysis and life cycle costing for poly(butylene succinate) and poly(lactic acid) production using renewable resources
LACTIC ACID		0.595667	g LA/g initial sugars	0.181675			Optimisation of lactic acid fermentation from beet molasses by strain FD173	https://analyticalsciencejournals.onlinelibrary.wiley.com/doi/full/10.1002/jctb.4838
LACTIC ACID		0.81-0.97	g LA/g sugar	0.27621			Subsequent improvement of lactic acid production from beet molasses by Enterococcus hirae ds10 using different fermentation strategies	https://link.springer.com/article/10.1023/A:1015523126741
LACTIC ACID		0.16	g LA/g molasses	0.16			Effect of different carbon sources on l(+) -lactic acid production by Rhizopus oryzae	https://sci-hub.se/https://doi.org/10.1504/IJEP.2009.026655
LACTIC ACID	rice grain	0.628267	theoretical yield g/g	0.314133	0.314133		50% theoretical yield	https://www.sciencedirect.com/science/article/pii/S2589014X20302395#t0010
LACTIC ACID	rice hull	0.49-6.71	Yield (%)	0.0410867	0.247931	0.173484	https://analyticalsciencejournals.onlinelibrary.wiley.com/doi/full/10.1002/jctb.1797	https://www.sciencedirect.com/science/article/pii/S1369703X04000920?pes=vor#TBL1
LACTIC ACID		6.79	yield g/100g RH	0.0679			https://www.sciencedirect.com/science/article/pii/S0141813023060531
LACTIC ACID		0.83	η (lactic acid) lactic acid produced/sugar consumed (g/g).	0.399003			https://www.hindawi.com/journals/bmri/2013/934171/#conclusions
LACTIC ACID		99.2	LA conversion rate (%)	0.476881			https://link.springer.com/article/10.1007/s00449-021-02591-x
LACTIC ACID		0.53	YLA/S (g g−1)	0.254785			https://link.springer.com/article/10.1007/s10570-019-02571-1
LACTIC ACID	rice bran	80.21-97.2	Lactate yield on glucose%	0.152231	0.141285	0.0154836	https://pubs.rsc.org/en/content/articlelanding/2014/ra/c3ra46140h
LACTIC ACID		68	Yield %	0.11283			https://www.sciencedirect.com/science/article/pii/S0960852407005731?via%3Dihub
LACTIC ACID		85	Yield %	0.141037			https://www.sciencedirect.com/science/article/pii/S1389172312004525?via%3Dihub
LACTIC ACID		71-98	Yield of product%	0.142697			https://www.sciencedirect.com/science/article/pii/S096085241501278X?via%3Dihub#t0005
LACTIC ACID		0.95	average yield (g g−1)	0.15763			https://pubs.rsc.org/en/content/articlelanding/2015/ra/c4ra04641b
LACTIC ACID	apple	34.1-62.7	Lactic acid production yield (g/100 g)	0.0678908	0.061321	0.00927796	https://www.sciencedirect.com/science/article/pii/S0023643806000326?via%3Dihub#tbl4
LACTIC ACID		30.2-65.8	Lactic acid production yield (g/100 g)	0.0678722			https://www.sciencedirect.com/science/article/pii/S0032959204000500
LACTIC ACID		0.4	g/g VSfeedstock	0.0482			https://www.sciencedirect.com/science/article/pii/S096085242031511X?via%3Dihub#t0015
LACTIC ACID	apple pomace	35.5	yield g/100 g Dry AP	0.319606	0.355919	0.0445343	https://analyticalsciencejournals.onlinelibrary.wiley.com/doi/10.1002/jctb.1838
LACTIC ACID		46.5	yield g/100 g Dry AP	0.418639			https://www.sciencedirect.com/science/article/pii/S0960852407000119?via%3Dihub
LACTIC ACID		36.6	yield g/100 g Dry AP	0.32951			https://pubs.acs.org/doi/10.1021/jf070442v
LACTIC ACID	orange	0.088468	theoretical yield g/g	0.044234	0.044234	0	50% theoretical yield
LACTIC ACID	orange peel	59.4-87.3	yield %	0.121018	0.117992	0.0300149	https://www.sciencedirect.com/science/article/pii/S1369703X1930052X?via%3Dihub#tbl0005
LACTIC ACID		0.88	yield (g g−1)	0.138667			https://onlinelibrary.wiley.com/doi/epdf/10.1002/jsfa.9958
LACTIC ACID		34.58-39.807	Yield (%)	0.0593633			https://onlinelibrary.wiley.com/doi/10.1002/jsfa.12537
LACTIC ACID		0.75-0.88	YP,S (g/g)	0.132243			https://link.springer.com/article/10.1007/s13399-019-00396-3
LACTIC ACID		88	yield %	0.138667			https://link.springer.com/article/10.1007/s00253-018-9432-4
LACTIC ACID	banana	0.124416	theoretical yield g/g	0.062208	0.062208		50% theoretical yield
LACTIC ACID	banana peel	0.72-0.89	yield g g−1-consumed sugars	0.403996	0.399623	0.00437344	https://www.sciencedirect.com/science/article/pii/S2589014X1930146X?via%3Dihub#t0010
LACTIC ACID		0.62-0.9	LA yield (g g−1)	0.395249			https://www.sciencedirect.com/science/article/pii/S1878818119307340?via%3Dihub#tbl3
LACTIC ACID	potato pulp	0.0907464	theoretical yield g/g	0.0453732	0.0453732		50% theoretical yield
LACTIC ACID	sweet potato	0.668	40% of the theoretical molar yield (%)	0.0628962	0.111241	0.0434324	https://link.springer.com/article/10.1007/s10570-019-02571-1
LACTIC ACID		0.85-0.91	Yield (g g−1)	0.168225			https://www.sciencedirect.com/science/article/pii/S1369703X13002738?via%3Dihub#tbl0015
LACTIC ACID		47-73	yield %	0.1026			https://link.springer.com/article/10.1007/s12010-009-8884-5
LACTIC ACID	sweet potato pulp	0.157333	theoretical yield g/g	0.0786664	0.0786664		50% theoretical yield
LACTIC ACID	barley	0.651055	theoretical yield g/g	0.325527	0.325527		50% theoretical yield
LACTIC ACID	spent grains	0.297	g/Gbsg	0.297	0.267553	0.0539076	Successive process for efficient biovalorization of Brewers’ spent grain to lignocellulolytic enzymes and lactic acid production through simultaneous saccharification and fermentation - ScienceDirect (uu.nl)
LACTIC ACID		35.54	g/L	0.290763			Effects of medium supplementation and pH control on lactic acid production from brewer's spent grain - ScienceDirect (uu.nl)
LACTIC ACID		0.34	g/g	0.34			Wastes from bioethanol and beer productions as substrates for l(+) lactic acid production – A comparative study - ScienceDirect (uu.nl)
LACTIC ACID		0.21	g/g	0.21			Brewer’s spent grain as raw material for lactic acid production by Lactobacillus delbrueckii | Biotechnology Letters (uu.nl)
LACTIC ACID		0.2	g/g	0.2			Effects of medium supplementation and pH control on lactic acid production from brewer's spent grain - ScienceDirect (uu.nl)
LACTIC ACID	rapeseed	0.148681	theoretical yield g/g	0.0743404	0.0743404		50% theoretical yield
LACTIC ACID	rapeseed meal	221	g/L				Impact of Hydrolysis Methods on the Utilization of Agricultural Residues as Nutrient Source for D-lactic Acid Production by <i>Sporolactobacillus inulinus</i> – DOAJ
SORBITOL	corn	0.838019	theoretical yield g/g	0.419009	0.419009		50% theoretical yield
SORBITOL	corn germ	0.160697	theoretical yield g/g	0.0803485	0.0803485		50% theoretical yield
SORBITOL	corn pericarp	0.522252	theoretical yield g/g	0.261126	0.261126		50% theoretical yield
SORBITOL	whole wheat	0.68128	theoretical yield g/g	0.34064	0.34064		50% theoretical yield
SORBITOL	wheat bran	0.335319	theoretical yield g/g	0.16766	0.16766		50% theoretical yield
SORBITOL	wheat germ	0.402358	theoretical yield g/g	0.201179	0.201179		50% theoretical yield
SORBITOL	potato	0.153918	theoretical yield g/g	0.0769589	0.0769589		50% theoretical yield
SORBITOL	tomato	0.0306394	theoretical yield g/g	0.0153197	0.0153197		50% theoretical yield
SORBITOL	tomato pomace	0.075795	theoretical yield g/g	0.0378975	0.0378975		50% theoretical yield
SORBITOL	sugarcane	0.260944	theoretical yield g/g	0.130472	0.130472		50% theoretical yield
SORBITOL	sugarcane bagasse	0.623838	theoretical yield g/g	0.311919	0.311919		50% theoretical yield
SORBITOL	sugarcane molasses	0.03-0.2	g sorb/g total reducing sugar	0.0596222	0.0596222	0	Optimization study for sorbitol production by Zymomonas mobilis in sugarcane molasses - ScienceDirect
SORBITOL	sugar beet	0.168996	theoretical yield g/g	0.0844981	0.0844981		50% theoretical yield
SORBITOL	sugar beet pulp	0.424945	theoretical yield g/g	0.212472	0.212472		50% theoretical yield	https://www.sciencedirect.com/science/article/pii/S0032959204000780
SORBITOL	sugar beet molasses	0.288436	theoretical yield g/g	0.144218	0.144218		50% theoretical yield
SORBITOL	rice grain	0.795731	theoretical yield g/g	0.397865	0.397865		50% theoretical yield
SORBITOL	rice hull	0.337716	theoretical yield g/g	0.168858	0.168858		50% theoretical yield
SORBITOL	rice bran	0.190746	theoretical yield g/g	0.0953732	0.0953732		50% theoretical yield
SORBITOL	apple	0.134221	theoretical yield g/g	0.0671104	0.0671104		50% theoretical yield
SORBITOL	apple pomace	0.550017	theoretical yield g/g	0.275008	0.275008		50% theoretical yield
SORBITOL	orange	0.0846157	theoretical yield g/g	0.0423078	0.0423078		50% theoretical yield
SORBITOL	orange peel	0.151679	theoretical yield g/g	0.0758396	0.0758396		50% theoretical yield
SORBITOL	banana	0.157579	theoretical yield g/g	0.0787895	0.0787895		50% theoretical yield
SORBITOL	banana peel	0.245447	theoretical yield g/g	0.122723	0.122723		50% theoretical yield
SORBITOL	potato pulp	0.112926	theoretical yield g/g	0.0564629	0.0564629		50% theoretical yield
SORBITOL	sweet potato	0.20572	theoretical yield g/g	0.10286	0.10286		50% theoretical yield
SORBITOL	sweet potato pulp	0.195421	theoretical yield g/g	0.0977106	0.0977106		50% theoretical yield
SORBITOL	barley	0.690084	theoretical yield g/g	0.345042	0.345042		50% theoretical yield
SORBITOL	spent grains	0.286671	theoretical yield g/g	0.143335	0.143335		50% theoretical yield
SORBITOL	rapeseed	0.0519792	theoretical yield g/g	0.0259896	0.0259896		50% theoretical yield
SORBITOL	rapeseed meal	0.14908	theoretical yield g/g	0.07454	0.07454		50% theoretical yield
XYLITOL	corn	0.42	g/g of xylose	0.0149597	0.0326713	0.0176845	Comparison of xylitol production from the isolated strain of Candida Se, in statistically optimized modified minimal medium and corncob hydrolyzate medium
XYLITOL		0.91-0.98	g/g xylose	0.037443			Optimization of dilute sulfuric acid pretreatment of corn stover for enhanced xylose recovery and xylitol production
XYLITOL		10%-58%	% g/g substrate	0.0143036			Particle size influence on the composition of sugars in corncob hemicellulose hydrolysate for xylose fermentation by Meyerozyma caribbica	http://www.envirobiotechjournals.com/article_abstract.php?aid=6215&iid=196&jid=1
XYLITOL		0.8684	% g/g xylose	0.0341869			Optimized Production of Xylitol from Xylose Using a Hyper-Acidophilic Candida tropicalis	https://link.springer.com/article/10.1007/s12257-016-0483-z
XYLITOL		1-2.74	g/g xylose	0.0624634			Combination of the CRP mutation and ptsG deletion in Escherichia coli to efficiently synthesize xylitol from corncob hydrolysates - ProQuest	https://www.sciencedirect.com/science/article/pii/S096085242101018X
XYLITOL	corn germ	0	theoretical yield g/g	0	0		50% theoretical yield	https://www.mdpi.com/2218-273X/5/3/1979
XYLITOL	corn pericarp	0.0753159	theoretical yield g/g	0.037658	0.037658		50% theoretical yield	https://link.springer.com/article/10.1007/s00253-019-10324-0
XYLITOL	whole wheat	0.0197124	theoretical yield g/g	0.00985622	0.00985622		50% theoretical yield
XYLITOL	wheat bran	300	g input for 1 L xylitol (xylitol concentration: 6.134 g/L)	0.0204467	0.0698701	0.0364116	Life cycle assessment of fermentative xylitol production from wheat bran: A comparative evaluation of sulphuric acid and chemical-free wet air oxidation-based pretreatment - ScienceDirect (wur.nl)
XYLITOL		0.39-0.71	yield g/g xylose	0.0820636			Optimized Bioconversion of Xylose Derived from Pre-Treated Crop Residues into Xylitol by Using Candida boidinii	https://link.springer.com/article/10.1007/s13399-020-01221-y
XYLITOL		0.68-0.72	yield g xylitol/g xylose	0.1071			Optimised fractionation of wheat bran for arabinose biopurification and xylitol fermentation by Ogataea zsoltii within a biorefinery process	https://www.sciencedirect.com/science/article/pii/S095965262302824X?casa_token=AJVwBlQT4awAAAAA:iBE6Ui5a4rPA9r4mYyLL37VyFgt7coeu9x2puuBiwdn-YedaKrYdNlUSC4CAOSj830Yn6MA#tbl1
XYLITOL	wheat germ	0	theoretical yield g/g	0	0		50% theoretical yield	https://www.mdpi.com/2073-4395/11/1/79
XYLITOL	potato	0.000971818	theoretical yield g/g	0.000485909	0.000485909		50% theoretical yield	https://www.sciencedirect.com/science/article/pii/S0926669019305163?via%3Dihub#sec0010
XYLITOL	tomato	0.000445004	theoretical yield g/g	0.000222502	0.000222502		50% theoretical yield
XYLITOL	tomato pomace	0.00733419	theoretical yield g/g	0.0036671	0.0036671		50% theoretical yield
XYLITOL	sugarcane	0.51-0.57	g/g xylose	0.0203468	0.0206012	0.00873024	Characteristics of adapted and non-adapted Candida tropicalis InaCC Y799 during fermentation of detoxified and undetoxified hemicellulosic hydrolysate from sugarcane trash for xylitol production | SpringerLink (wur.nl)
XYLITOL		63.17-75.52	Fermentation efficiency (%) of theoretical xylitol yield (0.917g/g)	0.0235228			Biochemical conversion of sugarcane straw hemicellulosic hydrolyzate supplemented with co-substrates for xylitol production - ScienceDirect (wur.nl)
XYLITOL		0.06-0.15	c/c xylose	0.00425602			Influence of Different Pretreatment Methods and Yeast Strains on Xylitol Production from Sugarcane Trash Hemicellulose Hydrolysate	https://link.springer.com/article/10.1007/s13399-021-02087-4
XYLITOL		0.69-0.78	g/g xylose	0.0298668			Rational engineering of industrial S. cerevisiae: towards xylitol production from sugarcane straw | Journal of Genetic Engineering and Biotechnology | Full Text (springeropen.com)	https://www.sciencedirect.com/science/article/pii/S096085241501562X
XYLITOL		0.67	g/g xylose	0.0250135			Sugarcane straw as a feedstock for xylitol production by Candida guilliermondii FTI 20037 - ScienceDirect (wur.nl)	sugarcane trash hemicellulose hydrolisate	https://link.springer.com/chapter/10.1007/978-981-19-0308-3_45
XYLITOL	sugarcane bagasse	0.54	g/g xylose	0.0675548	0.0670857	0.0107298	Response surface methodology for xylitol production from sugarcane bagasse hemicellulosic hydrolyzate using controlled vacuum evaporation process variables	https://link.springer.com/article/10.1186/s43141-022-00359-8
XYLITOL		0.5	g/g xylose	0.0625507			Integrated lignocellulosic bioprocess for co-production of ethanol and xylitol from sugarcane bagasse	https://www.scielo.br/j/bjm/a/GzLCVkXzjv7yBpQtQQxLqNS/?lang=en
XYLITOL		0.1-0.63	g/g xylose	0.050197			The influence of pH and dilution rate on continuous production of xylitol from sugarcane bagasse hemicellulosic hydrolysate by C. guilliermondii	https://www.sciencedirect.com/science/article/pii/S003295920200290X
XYLITOL		0.58	g/g xylose	0.0725588			Fermentation Strategies Explored for Xylitol Production	https://www.sciencedirect.com/science/article/pii/S0926669018305806
XYLITOL		0.66	g/g xylose	0.082567			Fermentation Strategies Explored for Xylitol Production	https://www.sciencedirect.com/science/article/pii/S0032959202002443
XYLITOL	sugarcane molasses	0	theoretical yield g/g	0	0		50% theoretical yield	https://link.springer.com/chapter/10.1007/978-3-642-31887-0_7	Cunha et al. (2006)
XYLITOL	sugar beet	5.39054e-05	theoretical yield g/g	2.69527e-05	2.69527e-05		50% theoretical yield	https://link.springer.com/chapter/10.1007/978-3-642-31887-0_8
XYLITOL	sugar beet pulp	0.00476818	theoretical yield g/g	0.00238409	0.00238409		50% theoretical yield
XYLITOL	sugar beet molasses	0.00259694	theoretical yield g/g	0.00129847	0.00129847		50% theoretical yield
XYLITOL	rice grain	0	theoretical yield g/g	0	0		50% theoretical yield
XYLITOL	rice hull	0.08-0.58	YP/S* (g/g)	0.0457184	0.0606873	0.0149689	https://link.springer.com/article/10.1007/s13399-024-05372-0
XYLITOL		0.0756562	Yxylp/s (g g−1)	0.0756562			https://link.springer.com/article/10.1007/s11274-016-2166-5
XYLITOL	rice bran	0.0327742	theoretical yield g/g	0.0163871	0.0163871		50% theoretical yield
XYLITOL	apple	0.000123542	theoretical yield g/g	6.17712e-05	6.17712e-05		50% theoretical yield
XYLITOL	apple pomace	0.0498105	theoretical yield g/g	0.0249053	0.0249053		50% theoretical yield
XYLITOL	orange	0.0138484	theoretical yield g/g	0.0069242	0.0069242		50% theoretical yield
XYLITOL	orange peel	0	theoretical yield g/g	0	0		50% theoretical yield
XYLITOL	banana	0	theoretical yield g/g	0	0		50% theoretical yield
XYLITOL	banana peel	0.06	Xylitol (g/L)	0.0142214	0.0359036	0.0216822	https://www.mdpi.com/2076-3417/11/12/5516
XYLITOL		0.115171	theoretical yield g/g	0.0575857			50% theoretical yield
XYLITOL	potato pulp	0.00101422	theoretical yield g/g	0.000507112	0.000507112		50% theoretical yield
XYLITOL	sweet potato	0.00134627	theoretical yield g/g	0.000673135	0.000673135		50% theoretical yield
XYLITOL	sweet potato pulp	0.00194284	theoretical yield g/g	0.000971422	0.000971422		50% theoretical yield
XYLITOL	barley	0.0679004	theoretical yield g/g	0.0339502	0.0339502		50% theoretical yield
XYLITOL	spent grains	0.02303	g/g	0.7	0.189294	0.255507	Acid hydrolysis and fermentation of brewer's spent grain to produce xylitol - Mussatto - 2005 - Journal of the Science of Food and Agriculture - Wiley Online Library (uu.nl)
XYLITOL		0.05684	g/g	0.05684			Xylitol production by Debaryomyces hansenii in brewery spent grain dilute-acid hydrolysate: effect of supplementation | Biotechnology Letters (uu.nl)
XYLITOL		0.07644	g/g	0.07644			Establishment of the optimum initial xylose concentration and nutritional supplementation of brewer's spent grain hydrolysate for xylitol production by Candida guilliermondii - ScienceDirect (uu.nl)
XYLITOL		0.04949	g/g	0.04949			Evaluation of the detoxification of brewery’s spent grain hydrolysate for xylitol production by Debaryomyces hansenii CCMI 941 - ScienceDirect
XYLITOL		0.0637	g/g	0.0637			Kinetic Behavior of Candida guilliermondii Yeast during Xylitol Production from Brewerapos;s Spent Grain Hemicellulosic Hydrolysate (uu.nl)
XYLITOL	rapeseed	0.024587	theoretical yield g/g	0.0122935	0.0122935		50% theoretical yield
XYLITOL	rapeseed meal	0.00592666	theoretical yield g/g	0.00296333	0.00296333		50% theoretical yield
